# Supplementary material for: Molecular Characterization Based on Whole-Genome Sequencing of Streptococcus pneumoniae in Children Living in Southwest China During 2017-2019
Source: Front Cell Infect Microbiol. 2021 Nov 2;11:726740. doi: 10.3389/fcimb.2021.726740 (PMC8593041; doi:10.3389/fcimb.2021.726740)
Supplement: Supplementary file 2 [file DataSheet_1.fasta]

>Vaccine~~~tuf~~~001~~~RESISTANCES~~~R6
ATGGCAAAAGAAAAATACGATCGTAGTAAACCACACGTTAACATTGGTACTATCGGACACGTTGACCACG
GTAAAACTACCCTAACTGCAGCTATCACAACTGTTTTGGCACGTCGCTTGCCTTCATCAGTTAACCAACC
TAAAGACTATGCGTCTATCGATGCTGCTCCAGAAGAACGCGAACGCGGTATCACTATCAACACTGCGCAC
GTTGAGTACGAAACTGAAAAACGTCACTACGCTCACATCGACGCTCCAGGACACGCGGACTACGTTAAAA
ACATGATCACTGGTGCTGCTCAAATGGACGGAGCTATCCTTGTAGTAGCTTCAACTGACGGACCAATGCC
ACAAACTCGTGAGCACATCCTTCTTTCACGTCAGGTTGGTGTTAAACACCTTATCGTCTTCATGAACAAA
GTTGACTTGGTTGACGACGAAGAATTGCTTGAATTGGTTGAAATGGAAATCCGTGACCTATTGTCAGAAT
ACGACTTCCCAGGTGACGATCTTCCAGTTATCCAAGGTTCAGCACTTAAAGCTCTTGAAGGTGACTCTAA
ATACGAAGACATCGTTATGGAATTGATGAACACAGTTGATGAGTATATCCCAGAACCAGAACGTGACACT
GACAAACCATTGCTTCTTCCAGTCGAGGACGTATTCTCAATCACTGGACGTGGTACAGTTGCTTCAGGAC
GTATCGACCGTGGTATCGTTAAAGTCAACGACGAAATCGAAATCGTTGGTATCAAAGAAGAAACTCAAAA
AGCAGTTGTTACTGGTGTTGAAATGTTCCGTAAACAACTTGACGAAGGTCTTGCTGGAGATAACGTAGGT
GTCCTTCTTCGTGGTGTTCAACGTGATGAAATCGAACGTGGACAAGTTATCGCTAAACCAGGTTCAATCA
ACCCACACACTAAATTCAAAGGTGAAGTCTACATCCTTACTAAAGAAGAAGGTGGACGTCACACTCCATT
CTTCAACAACTACCGTCCACAATTCTACTTCCGTACTACTGACGTTACAGGTTCAATCGAACTTCCAGCA
GGTACTGAAATGGTAATGCCTGGTGATAACGTGACAATCGACGTTGAGTTGATTCACCCAATCGCCGTAG
AACAAGGTACTACATTCTCTATCCGTGAGGGTGGACGTACTGTTGGTTCAGGTATGGTTACAGAAATCGA
AGCTTAA
>Vaccine~~~tuf~~~002~~~RESISTANCES~~~TIGR4
atggcaaaagaaaaatacgatcgtagtaaaccacacgttaacattggtactatcggacacgttgaccacggtaaaactaccctaactgcagctatcacaactgttttggcacgtcgcttgccttcatcagttaaccaacctaaagactatgcgtctatcgatgctgctccagaagaacgcgaacgcggtatcactatcaacactgcgcacgttgagtacgaaactgaaaaacgtcactacgctcacatcgacgctccaggacacgcggactacgttaaaaacatgatcactggtgctgctcaaatggacggagctatccttgtagtagcttcaactgacggaccaatgccacaaactcgtgagcacatccttctttcacgtcaggttggtgttaaacaccttatcgtcttcatgaacaaagttgacttggttgacgacgaagaattgcttgaattggttgaaatggaaatccgtgacctattgtcagaatacgacttcccaggtgacgatcttccagttatccaaggttcagcacttaaagctcttgaaggtgactctaaatacgaagacatcgttatggaattgatgaacacagttgatgagtatatcccagaaccagaacgtgacactgacaaaccattgcttcttccagtcgaggacgtattctcaatcactggacgtggtacagttgcttcaggacgtatcgaccgtggtatcgttaaagtcaacgacgaaatcgaaatcgttggtatcaaagaagaaactcaaaaagcagttgttactggtgttgaaatgttccgtaaacaacttgacgaaggtcttgctggagataacgtaggtgtccttcttcgtggtgttcaacgtgatgaaatcgaacgtggacaagttatcgctaaaccaggttcaatcaacccacacactaaattcaaaggtgaagtctacatccttactaaagaagaaggtggacgtcacactccattcttcaacaactaccgtccacaattctacttccgtactactgacgttacaggttcaatcgaacttccagcaggtactgaaatggtaatgcctggtgataacgtgacaatcgacgttgagttgattcacccaatcgccgtagaacaaggtactacattctctatccgtgagggtggacgtactgttggttcaggtatggttacagaaatcgaagcttaa
>Vaccine~~~ply~~~003~~~RESISTANCES~~~R6
atggcaaataaagcagtaaatgactttatactagctatgaattacgataaaaagaaactcttgacccatcagggagaaagtattgaaaatcgtttcatcaaagagggtaatcagctacccgatgagtttgttgttatcgaaagaaagaagcggagcttgtcgacaaatacaagtgatatttctgtaacagctaccaacgacagtcgcctctatcctggagcacttctcgtagtggatgagaccttgttagagaataatcccactcttcttgcggttgatcgtgctccgatgacttatagtattgatttgcctggtttggcaagtagcgatagctttctccaagtggaagaccccagcaattcaagtgttcgcggagcggtaaacgatttgttggctaagtggcatcaagattatggtcaggtcaataatgtcccagctagaatgcagtatgaaaaaataacggctcacagcatggaacaactcaaggtcaagtttggttctgactttgaaaagacagggaattctcttgatattgattttaactctgtccattcaggtgaaaagcagattcagattgttaattttaagcagatttattatacagtcagcgtagacgctgttaaaaatccaggagatgtgtttcaagatactgtaacggtagaggatttaaaacagagaggaatttctgcagagcgtcctttggtctatatttcgagtgttgcttatgggcgccaagtctatctcaagttggaaaccacgagtaagagtgatgaagtagaggctgcttttgaagctttgataaaaggagtcaaggtagctcctcagacagagtggaagcagattttggacaatacagaagtgaaggcggttattttagggggcgacccaagttcgggtgcccgagttgtaacaggcaaggtggatatggtagaggacttgattcaagaaggcagtcgctttacagcagatcatccaggcttgccgatttcctatacaacttcttttttacgtgacaatgtagttgcgacctttcaaaacagtacagactatgttgagactaaggttacagcttacagaaacggagatttactgctggatcatagtggtgcctatgttgcccaatattatattacttgggatgaattatcctatgatcatcaaggtaaggaagtcttgactcctaaggcttgggacagaaatgggcaggatttgacggctcactttaccactagtattcctttaaaagggaatgttcgtaatctctctgtcaaaattagagagtgtaccgggcttgcctgggaatggtggcgtacggtttatgaaaaaaccgatttgccactagtgcgtaagcggacgatttctatttggggaacaactctctatcctcaggtagaggataaggtagaaaatgactag
>Vaccine~~~ply~~~004~~~RESISTANCES~~~TIGR4
atggcaaataaagcagtaaatgactttatactagctatgaattacgataaaaagaaactcttgacccatcagggagaaagtattgaaaatcgtttcatcaaagagggtaatcagctacccgatgagtttgttgttatcgaaagaaagaagcggagcttgtcgacaaatacaagtgatatttctgtaacagctaccaacgacagtcgcctctatcctggagcacttctcgtagtggatgagaccttgttagagaataatcccactcttcttgcggtcgatcgtgctccgatgacttatagtattgatttgcctggtttggcaagtagcgatagctttctccaagtggaagaccccagcaattcaagtgttcgcggagcggtaaacgatttgttggctaagtggcatcaagattatggtcaggtcaataatgtcccagctagaatgcagtatgaaaaaatcacggctcacagcatggaacaactcaaggtcaagtttggttctgactttgaaaagacagggaattctcttgatattgattttaactctgtccattcaggcgaaaagcagattcagattgttaattttaagcagatttattatacagtcagcgtagatgctgttaaaaatccaggagatgtgtttcaagatactgtaacggtagaggatttaaaacagagaggaatttctgcagagcgtcctttggtctatatttcgagtgttgcttatgggcgccaagtctatctcaagttggaaaccacgagtaagagtgatgaagtagaggctgcttttgaagctttgataaaaggagtcaaggtagctcctcagacagagtggaaacagattttggacaatacagaagtgaaggcggttattttagggggcgacccaagttcgggtgcccgagttgtaacaggcaaggtggatatggtagaggacttgattcaagaaggcagtcgctttacagcagatcatccaggcttgccgatttcctatacaacttcttttttacgtgacaatgtagttgcgacctttcaaaatagtacagactatgttgagactaaggttacagcttacagaaacggagatttactgctggatcatagtggtgcctatgttgcccaatattatattacttggaatgaattatcctatgatcatcaaggtaaggaagtcttgactcctaaggcttgggacagaaatgggcaggatttaacggctcactttaccactagtattcctttaaaagggaatgttcgtaatctctctgtcaaaattagagagtgtaccgggcttgcctgggaatggtggcgtacggtttatgaaaaaaccgatttgccactagtgcgtaagcggacgatttctatttggggaacaactctctatcctcaggtagaagataaggtagaaaatgactag
>Vaccine~~~pepO~~~005~~~RESISTANCES~~~TIGR4
atgacacgttatcaagatgatttttatgatgctatcaatggagaatggcaacagacagctgaaatcccagcagataagtctcaaacaggaggttttgttgatttagaccaggaaattgaagacctgatgttggcgacaacagacaagtggttagcaggtgaagaagtgcctgaggatgctatcttggaaaactttgtcaaataccaccgcctagttcgtgattttgacaagagagaagctgacggtatcacacctgtcttaccactccttaaagaattccaagaattggaaacttttgcggattttacagctaaactagcagagtttgagcttgcaggaaaaccaaacttccttccttttggtgtatcgccagactttatggatgctagaatcaatgttctatgggctagcgctccaagcacaatcttgccagatacgacctactatgcagaagaacatcctcagcgcgaagagctcttgactctttggaaagaaagcagcgcaaatctcctcaaggcttatgatttctctgatgaagaaattgaagacttgctagaaaaaagacttgaattggaccgccgagttgcggcagtggtgctctctaatgaagaaagttcagaatatgctaaactctatcatccatattcttacgaagatttcaagaaattcgcgcctgccctacctttggatgacttcttcaaagcagttattgggcaattaccagacaaggttattgtagacgaggaacgtttctggcaagcagcagagcaattctacagtgaggaatcctggtctctccttaaagcaaccttgattttgagtgttgtcaatctttcaaccagctatttaacagaggatatccgtgttttgtctggtgcctacagccgtgccctttctggagttccagaggcaaaagataaggtcaaagcagcttatcatctagcacaagaacctttcaagcaagccctggggctttggtacgcccgtgagaagttctctccagaagccaaggcggatgtggagaaaaaagtggcaaccatgattgatgtctataaggagcgtctgcttaagaatgactggctcactccagaaacctgtaaacaggctatcgtgaagctcaatgtgatcaaaccttatattggctatccagaagaattgcctgcacgttacaaggataaggtagtgaatgaaactgccagtctttttgagaatgctctagcctttgcgcgtgtggaaatcaagcacagttggagtaagtggaaccagcctgtagactataaggaatggggcatgcctgctcatatggtcaatgcctactacaatcctcagaagaacctgattgtctttccagcggccattttacaggcgcctttctatgacttgcatcagtcatcttctgctaactacggtggtattggggcagtgattgcccatgaaatttcccacgcctttgatactaacggggcttcctttgacgaaaatggtagcctcaaggattggtggacagagagcgactatgctgccttcaaggagaaaacacaaaaagtcattgaccaatttgatggacaggattcttatggagcaaccattaacggtaaattgactgtatcagaaaacgtggctgacttgggaggaatcgcagcagcgcttgaagcagctaagagagaagcagacttctcagcagaagagttcttctacaacttcggtcgcatctggcgcatgaaaggtcgtccagaatttatgaaacttttggctagcgtcgatgtgcacgcaccagccaaactccgtgtcaatgtgcaagtaccaaacttcgacgatttctttacaacctatgatgtcaaagaaggagacggaatgtggcgttcaccagaggagcgcgtgattatttggtaa
>Vaccine~~~pepO~~~006~~~RESISTANCES~~~R6
atgacacgttatcaagatgatttttatgatgctatcaatggagaatggcaacagacagctgaaatcccagcagataagtctcaaacaggaggttttgttgatttagaccaggaaattgaagacctgatgttggcgacaacagacaagtggttagcaggtgaagaagtgcctgaggatgctatcttggaaaactttgtcaaataccaccgcctagttcgtgattttgacaagagagaagctgacggtatcacacctgtcttaccactccttaaagaattccaagaattggaaacttttgcggattttacagctaaactagcagagtttgagcttgcaggaaaaccaaacttccttccttttggtgtatcgccagactttatggatgctagaatcaatgttctatgggctagcgctccaagcacaatcttgccagatacgacctactatgcagaagaacatcctcagcgcgaagagctcttgactctttggaaagaaagcagcgcaaatctcctcaaggcttatgatttctctgatgaagaaattgaagacttgctagaaaaaagacttgaattggaccgccgagttgcggcagtggtgctctctaatgaagaaagttcagaatatgctaaactctatcatccatattcttacgaagatttcaagaaattcgcgcctgccctacctttggatgacttcttcaaagcagttattgggcaattaccagacaaggttattgtagacgaggaacgtttctggcaagcagcagagcaattctacagtgaggaatcctggtctctccttaaagcaaccttgattttgagtgttgtcaatctttcaaccagctatttaacagaggatatccgtgttttgtctggtgcctacagccgtgccctttctggagttccagaggcaaaagataaggtcaaagcagcttatcatctagcacaagaacctttcaagcaagccctggggctttggtacgcccgtgagaagttctctccagaagccaaggcggatgtggagaaaaaagtggcaaccatgattgatgtctataaggagcgtctgcttaagaatgactggctcactccagaaacctgtaaacaggctatcgtgaagctcaatgtgatcaaaccttatattggctatccagaagaattgcctgcacgttacaaggataaggtagtgaatgaaactgccagtctttttgagaatgctctagcctttgcgcgtgtggaaatcaagcacagttggagtaagtggaaccagcctgtagactataaggaatggggcatgcctgctcatatggtcaatgcctactacaatcctcagaagaacctgattgtctttccagcggccattttacaggcgcctttctatgacttgcatcagtcatcttctgctaactacggtggtattggggcagtgattgcccatgaaatttcccacgcctttgatactaacggggcttcctttgacgaaaatggtagcctcaaggattggtggacagagagcgactatgctgccttcaaggagaaaacacaaaaagtcattgaccaatttgatggacaggattcttatggagcaaccattaacggtaaattgactgtatcagaaaacgtggctgacttgggaggaatcgcagcagcgcttgaagcagctaagagagaagcagacttctcagcagaagagttcttctacaacttcggtcgcatctggcgcatgaaaggtcgtccagaatttatgaaacttttggctagcgtcgatgtgcacgcaccagccaaactccgtgtcaatgtgcaagtaccaaacttcgacgatttctttacaacctatgatgtcaaagaaggagacggaatgtggcgttcaccagaggagcgcgtgattatttggtaa
>Vaccine~~~nanB~~~007~~~RESISTANCES~~~R6
atgaataaaagaggtctttattcaaaactaggaatttctgttgtaggcattagtcttttaatgggagtccccgctttgattcatgcgaatgaattaaactatggtcaactgtccatatctcctatttttcaaggaggttcatatcaactgaacaataagagtatagatatcagccctttgttattagataaattgtctggagatagtcagacagtagtaatgaaatttaaagcagataaaccaaactctcttcaagctttgtttggcctatctaatagtaaagcaggctttaaaaataattacttttcaattttcatgagagattctggtgagataggtgtagaaataagagacgcccaaaagggaataaattatttattttctagaccagcttcattatggggaaagcataaaggacaggcagttgaaaatacactagtatttgtatctgattctaaagataaaacatacacaatgtatgttaatggaatagaagtgttctctgaaacagttgatacatttttgccaatttcaaatataaatggtatagataaggcaacactaggagctgttaatcgtgaaggtaaggaacattacctcgcaaaaggaagtattgatgaaatcagtctatttaacaaagcaattagtgatcaggaagtttcaactattcccttatcaaatccatttcagttaattttccaatcaggagattctactcaagctaactattttagaataccgacactatatacattaagtagtggaagagttctatcaagtattgatgcacgttatggtgggactcatgattctaaaagtaagattaatattgccacttcttatagtgatgataatgggaaaacgtggagtgagccaatttttgctatgaagtttaatgactatgaggagcagttagtttactggccacgagataataaattaaagaatagtcaaattagtggaagtgcttcattcatagattcatccattgttgaagataaaaaatctgggaaaacgatattactagctgatgttatgcctgcgggtattggaaataataatgcaaataaagccgactcaggttttaaagaaataaatggtcattattatttaaaactaaagaagaatggagataacgatttccgttatacagttagagaaaatggtgtcgtttatgatgaaacaactaataaacctacaaattatactataaatgataagtatgaagttttggagggaggaaagtctttaacagtcgaacaatattcggttgattttgatagtggctctttaagagaaaggcataatggaaaacaggttcctatgaatgttttctacaaagattcgttatttaaagtgactcctactaattatatagcaatgacaactagtcagaatagaggagagagttgggaacaatttaagttgttgcctccgttcttaggagaaaaacataatggaacttacttgtgtcccggacaaggtttagcattaaaatcaagtaacagattgatttttgcaacatatactagtggagaactaacctatctcatttctgatgatagtggtcaaacatggaagaaatcctcagcttcaattccgtttgaaaatgcaacagcagaagcacaaatggttgaactgagagatggtgtgattagaacattctttagaaccactacaggtaagatagcttatatgactagtagagattctggagaaacatggtcggaagtttcgtatattgatggaatccaacaaacttcatatggcacacaagtatctgcaattaaatactctcaattaattgatggaaaagaagcagtcattttgagtacaccaaattctagaagtggccgtaagggaggtcaattagttgtcggtttagtcaataaagaagatgatagtattgattggaaataccactatgatattgatttgccttcgtatggttatgcctattctgcgattacagaattgccaaatcatcacataggtgtactgtttgaaaaatatgattcgtggtcgagaaatgaattgcatttaagcaatgtagttcagtatatagatttggaaattaatgatttaacaaaataa
>Vaccine~~~nanA~~~008~~~RESISTANCES~~~R6
atgtcttatttcagaaatcgggatatagatatagagaggaacagtatgaatcggagtgttcaagaacgtaagtgtcgttatagcattaggaaactatcggtaggagcggtttctatgattgtaggagcagtggtatttggaacgtctcctgttttagctcaagaaggggcaagtgagcaacctctggcaaatgaaactcaactttcgggggagagctcaaccctaactgatacagaaaagagccagccttcttcagagactgaactttctggcaataagcaagaacaagaaaggaaagataagcaagaagaaaaaattccaagagattactatgcacgagatttggaaaatgtcgaaacagtgatagaaaaagaagatgttgaaaccaatgcttcaaatggtcagagagttgatttatcaagtgaactagataaactaaagaaacttgaaaacgcaacagttcacatggagtttaagccagatgccaaggccccagcattctataatctcttttctgtgtcaagtgctactaaaaaagatgagtacttcactatggcagtttacaataatactgctactctagaggggcgtggttcggatgggaaacagttttacaataattacaacgatgcacccttaaaagttaaaccaggtcagtggaattctgtgactttcacagttgaaaaaccgacagcagaactacctaaaggccgagtgcgcctctacgtaaacggggtattatctcgaacaagtctgagatctggcaatttcattaaagatatgccagatgtaacgcatgtgcaaatcggagcaaccaagcgtgccaacaatacggtttgggggtcaaatctacagattcggaatctcactgtgtataatcgtgctttaacaccagaagaggtacaaaaacgtagtcaactttttaaacgctcagatttagaaaaaaaactacctgaaggagcggctttaacagagaaaacggacatattcgaaagcgggcgtaacggtaaaccaaataaagatggaatcaagagttatcgtattccagcacttctcaagacagataaaggaactttgatcgcaggtgcagatgaacgccgtctccattcgagtgactggggtgatatcggtatggtcatcagacgtagtgaagataatggtaaaacttggggtgaccgagtaaccattaccaacttacgtgacaatccaaaagcttctgacccatcgatcggttcaccagtgaatatcgatatggtgttggttcaagatcctgaaaccaaacgaatcttttctatctatgacatgttcccagaagggaagggaatctttggaatgtcttcacaaaaagaagaagcctacaaaaaaatcgatggaaaaacctatcaaatcctctatcgtgaaggagaaaagggagcttataccattcgagaaaatggtactgtctatacaccagatggtaaggcgacagactatcgcgttgttgtagatcctgttaaaccagcctatagcgacaagggggatctatacaagggtaaccaattactaggcaatatctacttcacaacaaacaaaacttctccatttagaattgccaaggatagctatctatggatgtcctacagtgatgacgacgggaagacatggtcagcgcctcaagatattactccgatggtcaaagccgattggatgaaattcttgggtgtaggtcctggaacaggaattgtacttcggaatgggcctcacaagggacggattttgataccggtttatacgactaataatgtatctcacttaaatggctcgcaatcttctcgtatcatctattcagatgatcatggaaaaacttggcatgctggagaagcggtcaacgataaccgtcaggtagacggtcaaaagatccactcttctacgatgaacaatagacgtgcgcaaaatacagaatcaacggtggtacaactaaacaatggagatgttaaactctttatgcgtggtttgactggagatcttcaggttgctacaagtaaagacggaggagtgacttgggagaaggatatcaaacgttatccacaggttaaagatgtctatgttcaaatgtctgctatccatacgatgcacgaaggaaaagaatacatcatcctcagtaatgcaggtggaccgaaacgtgaaaatgggatggtccacttggcacgtgtcgaagaaaatggtgagttgacttggctcaaacacaatccaattcaaaaaggagagtttgcctataattcgctccaagaattaggaaatggggagtatggcatcttgtatgaacatactgaaaaaggacaaaatgcctataccctatcatttagaaaatttaattgggactttttgagcaaagatctgatttctcctaccgaagcgaaagtgaagcgaactagagagatgggcaaaggagttattggcttggagttcgactcagaagtattggtcaacaaggctccaacccttcaattggcaaatggtaaaacagcacgcttcatgacccagtatgatacaaaaaccctcctatttacagtggattcagaggatatgggtcaaaaagttacaggtttggcagaaggtgcaattgaaagtatgcataatttaccagtctctgtggcgggcactaagctttcgaatggaatgaacggaagtgaagctgctgttcatgaagtgccagaatacacaggcccattagggacatccggcgaagagccagctccaacagtcgagaagccagaatacacaggcccactagggacatccggcgaagagccagccccgacagtcgagaagccagaatacacaggcccactagggacagctggtgaagaagcagctccaacagtcgagaagccagaatttacagggggagttaatggtacagagccagctgttcatgaaatcgcagagtataagggatctgattcgcttgtaactcttactacaaaagaagattatacttacaaagctcctcttgctcagcaggcacttcctgaaacaggaaacaaggagagtgacctcctagcttcactaggactaacagctttcttccttggtctgtttacgctagggaaaaagagagaacaataa
>Vaccine~~~PutativenNeuraminidase~~~009~~~RESISTANCES~~~TIGR4
atgaaaaaaaatattaaacaatatgtaaccttaggtactgtagtggtattatcagcatttgttgctaactcagttgcagctcaggagactgaaacttctgaagtatcaacaccaaagttggtgcaacctgttgcaccaacgactccgatttcggaagtacaacctacatcggataactcttcggaagttactgtacaacctcgaacagttgaaactactgttaaggatccatcttctacagcggaagaaactcctgtcttagaaaaaaataatgttactttaacagggggcggagaaaatgttactaaagagttaaaggataaatttactagcggtgactttactgtagtgattaagtacaatcagtcaagtgagaaaggcttacaagctctgtttggaatatctaattccaaacccggtcaacaaaatagttatgtagatgtgttccttagagacaatggtgagttggggatggaagcgcgtgatacttcttccaataaaaataacctagtatccagacctgcttcagtttggggtaagtacaaacaagaggctgtgactaacactgttgcagtagtagcagattcagtcaaaaaaacatattctttatacgcaaatggtacaaaagtagtagaaaagaaagtggataatttcctaaacatcaaggatattaaaggtattgattactatatgcttgggggagtgaaacgtgcaggaaaaacggcgtttggttttaacggaacactagaaaatatcaaattctttaatagtgcattggatgaagaaactgttaaaaagatgacaacaaacgctgttactggacatttaatttatacggctaatgatacaacaggttctaactatttccgtattccagttctgtatacttttagcaatggtcgggtattttcaagcattgacgctcgttacggtggaactcatgatttcttgaataaaattaatattgctacaagttatagtgatgataatggtaagacatggactaaaccaaaattaacattggcattcgatgattttgcgccagtaccattagaatggcctcgtgaagttggtggacgtgacttacaaatcagcggtggtgcaacctatattgactctgttattgttgaaaaaaagaacaaacaagtactcatgtttgctgatgtgatgcctgctggagtaagttttagagaagcaactagaaaagattcaggttataaacaaattgatggtaattattaccttaaattaaggaaacaaggtgatactgattacaattatactattcgtgagaatggtactgtatacgacgatcgtaccaacagaccaactgaattttcagtagataaaaatttcggtattaaacaaaatggtaattatttgacggtagagcaatattcggtttcatttgaaaataataaaaagactgaatatcgtaatgggactaaagtccatatgaatatcttctacaaagatgcattgtttaaagtagtgccaacgaactatattgcatatatttctagcaatgatcatggcgaatcttggtctgcaccaactttattacctcctataatgggacttaatcggaatgcgccatatttaggtcctggacgtggaatcattgaaagctcaactggacgtattcttattccgtcttacactggtaaagagtctgcgttcatttatagtgacgataatggagcatcttggaaagttaaagtagtgccacttccttctagttggtcagcagaagcacaatttgtagaattgagtccaggagtaattcaagcatatatgcgtacaaataatggtaaaattgcatatttaacaagtaaagacgcaggtactacttggagtgcaccggaatatttgaaatttgtttcaaatccaagttatggaacacaattatcaatcatcaattatagccaattgattgatggtaaaaaggctgtcattttaagtactccaaactccacaaatggtcgtaaacacggacaaatttggattggtctaattaatgatgataatacaattgattggcgttatcatcacgacgttgattatagtaactatggatactcatattcaacattgacagagttaccaaatcatgaaattggattgatgtttgaaaaatttgattcatggtctcgtaatgaacttcatatgaaaaatgttgtaccatatataacatttaagattgaagatctgaaaaagaattaa
>Vaccine~~~dnaJ~~~010~~~RESISTANCES~~~TIGR4
atgaacaatactgaattttatgatcgtctgggggtatccaaaaacgcttcggcagacgaaatcaaaaaggcttatcgtaagctttccaaaaaatatcacccagatatcaacaaggagcctggtgctgaggacaagtacaaggaagttcaagaagcctatgagactttgagtgacgaccaaaaacgtgctgcctatgaccagtatggtgctgcaggcgccaatggtggttttggtggagctggtggtttcggcggtttcaatggggcaggtggcttcggtggttttgaggatattttctcaagtttcttcggcggaggcggttcttcgcgcaatccaaacgctcctcgccaaggagatgatctccagtatcgtgtcaatttgacctttgaagaagctatcttcggaactgagaaggaagttaagtatcatcgtgaagctggctgtcgtacatgtaatggatctggtgctaagccagggacaagtccagtcacttgtggacgctgtcatggcgctggtgtcattaacgtcgatacgcagactcctcttggtatgatgcgtcgccaagtaacctgtgatgtctgtcacggtcgaggaaaagaaatcaaatatccatgtacaacctgtcatggaacaggtcatgagaaacaagctcatagcgtacatgtgaaaatccctgctggtgtggaaacaggtcaacaaattcgcctcgctggtcaaggtgaagcaggctttaacggtggaccttatggtgacttgtatgtagtagtttctgtggaagctagcgacaagtttgaacgtgaaggaacgactatcttctacaatctcaacctcaactttgtccaagcggctcttggtgatacagtagatattccaactgttcacggtgatgttgaattggttattccagagggaactcagactggtaagaagttccgcctacgtagtaagggggcaccgagccttcgtggcggtgcagttggtgaccaatacgttactgttaatgtcgtaacaccgacaggcttgaacgaccgccaaaaagtagccttgaaagaattcgcggctgctggtgacttgaaagtaaatccaaagaaaaaaggcttctttgaccatattaaagatgcctttgatggagaataa
>Vaccine~~~papP~~~011~~~RESISTANCES~~~TIGR4
atggagatttgccaacaaattttagaaaaaattaaagaatacgacaccattatcattcatcgtcatatgaaaccagaccctgatgccttgggaagtcaggtgggattgaaagccttgctggaacatcatttcccagaaaaaaccatcaaagccgtcggttttgatgaaccaactcttacttggatggctgagatggatcttgttgaagatagagcctaccaaggcgcacttgtcatcgtctgtgatacagctaatactgctcgtatcgatgataagcgctatagtcaaggtgattttctcattaagattgaccaccatccaaatgatgatgtatacggtgacctgtcttgggtcgatactagttcaagtagcgctagcgagatgattaccctatttgcccaaacaacccaactagccttggcagatcgcgatgctgagttgctctttgcaggaattgtcggtgatacaggtcgcttcctctacccttctaccactgcacggactcttcgcctggctgcttatttgagagaacataactttgactttgcggctctcactcgcaaaatggacactatgagctacaaaattgctaaactgcaaggctacatctacgaccatctggaagtggatgaaaatggtgctgctcgcgttatcctgagtcagaaaatcttgaaacaatacaatataaccgatgctgaaactgcggccattgtaggtgcacctggacgcattgacagagtgagtctctggggaatttttgtcgaacaggctgatggccactaccgagttcgcttacgcagtaaagtccatcctatcaatgaaattgccaaggagcatgatggtggaggccaccctctagcaagtggtgctaattcctatagcctagaagaaaacgaaatcatctaccaaaagttaaaaaacttgcttaaaaactga
>Vaccine~~~phtD~~~012~~~RESISTANCES~~~TIGR4
atgaaaattaataaaaaatatctagcaggttcagtggcagtccttgccctaagtgtttgttcctatgaacttggtcgtcaccaagctggtcaggttaagaaagagtctaatcgagtttcttatatagatggtgatcaggctggtcaaaaggcagaaaacttgacaccagatgaagtcagtaagagggaggggatcaacgccgaacaaatcgtcatcaagattacggatcaaggttatgtgacctctcatggagaccattatcattactataatggcaaggtcccttatgatgccatcatcagtgaagagctcctcatgaaagatccgaattatcagttgaaggattcagacattgtcaatgaaatcaagggtggttatgttatcaaggtagatggaaaatactatgtttaccttaaggatgcagctcatgcggataatattcggacaaaagaagagattaaacgtcagaagcaggaacacagtcataatcacgggggtggttctaacgatcaagcagtagttgcagccagagcccaaggacgctatacaacggatgatggttatatcttcaatgcatctgatatcattgaggacacgggtgatgcttatatcgttcctcacggcgaccattaccattacattcctaagaatgagttatcagctagcgagttagctgctgcagaagcctattggaatgggaagcagggatctcgtccttcttcaagttctagttataatgcaaatccagctcaaccaagattgtcagagaaccacaatctgactgtcactccaacttatcatcaaaatcaaggggaaaacatttcaagccttttacgtgaattgtatgctaaacccttatcagaacgccatgtggaatctgatggccttattttcgacccagcgcaaatcacaagtcgaaccgccagaggtgtagctgtccctcatggtaaccattaccactttatcccttatgaacaaatgtctgaattggaaaaacgaattgctcgtattattccccttcgttatcgttcaaaccattgggtaccagattcaagaccagaacaaccaagtccacaatcgactccggaacctagtccaagtccgcaacctgcaccaaatcctcaaccagctccaagcaatccaattgatgagaaattggtcaaagaagctgttcgaaaagtaggcgatggttatgtctttgaggagaatggagtttctcgttatatcccagccaaggatctttcagcagaaacagcagcaggcattgatagcaaactggccaagcaggaaagtttatctcataagctaggagctaagaaaactgacctcccatctagtgatcgagaattttacaataaggcttatgacttactagcaagaattcaccaagatttacttgataataaaggtcgacaagttgattttgaggctttggataacctgttggaacgactcaaggatgtcccaagtgataaagtcaagttagtggatgatattcttgccttcttagctccgattcgtcatccagaacgtttaggaaaaccaaatgcgcaaattacctacactgatgatgagattcaagtagccaagttggcaggcaagtacacaacagaagacggttatatctttgatcctcgtgatataaccagtgatgagggggatgcctatgtaactccacatatgacccatagccactggattaaaaaagatagtttgtctgaagctgagagagcggcagcccaggcttatgctaaagagaaaggtttgacccctccttcgacagaccatcaggattcaggaaatactgaggcaaaaggagcagaagctatctacaaccgcgtgaaagcagctaagaaggtgccacttgatcgtatgccttacaatcttcaatatactgtagaagtcaaaaacggtagtttaatcatacctcattatgaccattaccataacatcaaatttgagtggtttgacgaaggcctttatgaggcacctaaggggtatactcttgaggatcttttggcgactgtcaagtactatgtcgaacatccaaacgaacgtccgcattcagataatggttttggtaacgctagcgaccatgttcgtaaaaataaggtagaccaagacagtaaacctgatgaagataaggaacatgatgaagtaagtgagccaactcaccctgaatctgatgaaaaagagaatcacgctggtttaaatccttcagcagataatctttataaaccaagcactgatacggaagagacagaggaagaagctgaagataccacagatgaggctgaaattcctcaagtagagaattctgttattaacgctaagatagcagatgcggaggccttgctagaaaaagtaacagatcctagtattagacaaaatgctatggagacattgactggtctaaaaagtagtcttcttctcggaacgaaagataataacactatttcagcagaagtagatagtctcttggctttgttaaaagaaagtcaaccggctcctatacagtag
>Vaccine~~~rlrA~~~013~~~RESISTANCES~~~TIGR4
atgctaaacaaatacattgaaaaaagaattacagataaaattaccattttaaatatattattggatattcggtctattgaactagatgaactgtctactttaacttcattacaatctaaaagtctcctaagcattttgcaggaattacaagaaacattcgaggaagagttgacatttaatttagatacgcaacaagttcaattaatcgaacaccattctcatcaaacgaattattacttccatcagctttataaccaatcaactattttaaaaatactccgcttctttctactacaaggtaatcaaagctttaacgaatttacacaaaaagagtatatttccatcgcaacaggctaccgcgtacgacaaaagtgtggcttgttactacgttcagtaggtttggaccttgtgaaaaatcaagtagttggtcctgaatatcgcattcgttttttaattgcactcctccagtttcattttggtattgagatttatgatttgaatgatggaagtatggattgggtcacacatatgattgtgcagtctaattctcaactcagtcatgaactgttagaaatcacacctgacgagtatgttcattttagcatactagtggcactcacttggaaacgtcgggaatttccacttgagttccctgagtccaaagagtttgaaaaattaaaaaacctctttatgtatccgattttgatggaacattgccaaacttacttagagccacatgccaacatgacttttactcaggaagaactggattatatctttttggtttattgttctgctaattcttcgttttccaaggacaaatggaatcaagaaaaaaagactcatactattcaactgattcttcagcatacaagaggaaagcatctactatccaagttcaagaatatcttaggaaatgacatttcgaattctctttcttttttaacagcactgactttcttaacaagaacgtttttgtttggtttacaaaatctagttccctattataattattacgaacattatgggattgaaagcgacaagccactgtatcatatttcgaaagcaattgttcaagagtggatgactgagcagaagattgaaggagttatcgaccagcatcggctgtaccttttctcactctacttgacagaaaccatcttttcctcactacctgctatcccgatttttatcattttaaataatcaagcagatgtaaacttaataaagtccattattttacggaattttactgacaaagttgcctctgttacaggatacaatattctaattagtcctcctccttcagaggagcatttgacagagccattgattattattacaacgaaagaatacctgccttacgttaaaaagcagtatcccaaagggaaacatcactttttgacgattgccttagatttgcatgttagccaacagcgtctcatctatcagacaattgtagatatccgaaaagaggcttttgacaaacgggtcgcaatgattgctaaaaaggctcactatttgttataa
>Vaccine~~~sipA(lepB)~~~014~~~RESISTANCES~~~TIGR4
atgaattcatttaaaaatttcttaaaagagtggggattgttcctcctaattctgtcattactagctttaagtcgtatctttttttggagcaatgttcgcgtagaaggacattccatggatccgaccctagcggatggcgaaattctcttcgttgtaaaacaccttcctattgaccgttttgatatcgtggtggcccatgaggaagatggcaataaggacatcgtcaagcgcgtgattggaatgcctggcgacaccattcgttacgaaaatgataaactctacatcaatgacaaagaaacggacgagccttatctagcagactatatcaaacgcttcaaggatgacaaactccaaagcacttactcaggcaagggctttgaaggaaataaaggaactttctttagaagtatcgctcaaaaagctcaagccttcacagttgatgtcaactacaacaccaactttagctttactgttccagaaggagaataccttctcctcggagatgaccgcttggtttcgagcgacagccgccacgtaggtaccttcaaagcaaaagatatcacaggggaagctaaattccgcttatggccaatcacccgtatcggaacattttaa
>Vaccine~~~pfbA~~~015~~~RESISTANCES~~~TIGR4
ttgttaaaaatagtaaaaaaattggaggttctgatgaaatattttgttcctaatgaggtattcagtattcgtaaattaaaggtggggacttgctcggtactattggcaatttcaattttgggaagccaaggtattttatcggatgaagttgttactagttcttcaccgatggctacaaaagagtcttctaatgcaattactaatgatttagataattcaccaactgttaatcagaatcgttctgctgaaatgattgcctctaattcaaccactaatggtttagataattcgttaagtgttaatagtatcagctctaatggtactattcgttccaattcacaattagacaacagaacagttgaatctacagtaacatctactaatgaaaataagagttataaggaagatgttataagtgacagaattatcaaaaaagaatttgaagatactgctttaagtgtaaaagattatggtgcggtaggtgatgggattcatgatgatcgacaagcaattcaagatgcaatagatgctgcagctcaagggctaggtggaggaaatgtatattttcctgaaggaacttatttagtaaaagaaattgtttttttaaaaagtcatacacacttagaattgaatgagaaagctacaattctaaatggtataaatattaagaatcacccttccattgtttttatgacaggtttatttacggatgatggtgcgcaagtagaatggggcccaacagaagatattagttattctggtggtacgattgatatgaacggtgctttgaatgaagaaggaactaaagcaaaaaatctaccacttataaattcttcaggtgcatttgctattgggaattcaaataacgtaactataaaaaatgtaacattcaaggatagttatcaagggcatgctattcaaattgcaggttcgaaaaatgtattagttgataattctcgttttcttgggcaagccttacccaaaacgatgaaggatgggcaaatcataagtaaggagagcattcagattgaaccattaactagaaaaggttttccttatgccttgaatgatgatgggaaaaaatctgaaaatgtgactattcaaaattcctattttggcaaaagtgataaatctggggaattagtaacagcaattggcacacactatcaaacattgtcgacacagaacccctctaatattaaaattcaaaataatcattttgataacatgatgtatgcaggtgtacgttttacaggattcactgatgtattaatcaaaggaaatcgctttgataagaaagttaaaggagagagtgtacattatcgagaaagcggagcagctttagtaaatgcttatagctataaaaacactaaagacctattagatttaaataaacaggtggttatcgccgaaaatatatttaatattgccgatcctaaaacaaaagcgatacgagttgcaaaagatagtgcagaatatttaggaaaagtatcagatattactgtaacaaaaaatgtaattaataataattctaaggaaacagaacaaccaaatattgaattattacgagttagtgataatttagtagtctcagagaatagtatattcgggggtaaagaaggaattgttattgaggattcaaagggtaaaataaccgttttaaataaccaattttataatttatccggtaagtatatatcattcatcaaatctaatgcaaatgggaaagaacctgttatacgtgatagcgatggtaatttcaatattgtaacggagaatgggctttacaaaattgtaacaaataatttaagtgataaaaacgaaaaagaaaaaaacaaagaggaaaaacaatctaattcaaataatgtaattgatagtaaccagaagaacggagagtttaactcaagtaaagataatagacaaatgaatgacaagatcgacaataaacaagataataagacagaagaagtaaactataaaatagttggagatggcagagaaactgaaaatcatattaataaatctaaagaaatagtagatgtaaaacaaaaattaccaaagactggttcgaataagattatggaactattcttaacagtgacaggaattggtttacttttgacactaaaagggttgaagtattatggtaaagataaataa
>Vaccine~~~plyD~~~016~~~RESISTANCES~~~DESC
aacggagatttactgctggatcatagtggtgcctatgttgcccaatattatattacttgggatgaattatcctatgatcatcaaggtaaggaagtcttgactcctaaggcttgggacagaaatgggcaggatttgacggctcactttaccactagtattcctttaaaagggaatgttcgtaatctctctgtcaaaattagagagGCtaccgggcttgcctgggaatggtggcgtacggtttatgaaaaaaccgatttgccactagtgcgtaagcggacgatttctatttggggaacaactctctatcctcaggtagaggataaggtagaaaatgactag
>Vaccine~~~tufA~~~017~~~RESISTANCES~~~DESC
gagtatatcccagaaccagaacgtgacactgacaaaccattgcttcttccagtcgaggacgtattctcaatcactggacgtggtacagttgcttcaggacgtatcgaccgtggtatcgttaaagtcaacgacgaaatcgaaatcgttggtatcaaagaagaaactcaaaaagcagttgttactggtgttgaaatgttccgtaaacaacttgacgaaggtcttgctggagataacgtaggtgtccttcttcgtggtgttcaacgtgatgaaatcgaacgtggacaagttatcgctaaaccaggttcaatcaacccacacactaaattcaaaggtgaagtctacatccttactaaagaagaaggtggacgtcacactccattcttcaacaactaccgtccacaa
>Vaccine~~~nanA1~~~018~~~RESISTANCES~~~DESC
caagaaggggcaagtgagcaacctctggcaaatgaaactcaactttcgggggagagctcaaccctaactgatacagaaaagagccagccttcttcagagactgaactttctggcaataagcaagaacaagaaaggaaagataagcaagaagaaaaaattccaagagattactatgcacgagatttggaaaatgtcgaaacagtgatagaaaaagaagatgttgaaaccaatgcttcaaatggtcagagagttgatttatcaagtgaactagataaactaaagaaacttgaaaacgcaacagttcacatggagtttaagccagatgccaaggccccagcattctataatctcttttctgtgtcaagtgctactaaaaaagatgagtacttcactatggcagtttacaataatactgctactctagaggggcgtggttcggatgggaaacagttttacaataattacaacgatgcacccttaaaagttaaaccaggtcagtggaattctgtgactttcacagttgaaaaaccgacagcagaactacctaaaggccgagtgcgcctctacgtaaacggggtattatctcgaacaagtctgagatctggcaatttcattaaagatatgccagatgtaacgcatgtgcaaatcggagcaaccaagcgtgccaacaatacggtttgggggtcaaatctacagattcggaatctcactgtgtataatcgtgctttaacaccagaagaggtacaaaaacgtagtcaactttttaaacgctcagatttagaaaaaaaactacctgaaggagcggctttaacagagaaaacggacatattcgaaagcgggcgtaacggtaaaccaaataaagatggaatcaagagttatcgtattccagcacttctcaagacagataaaggaactttgatcgcaggtgcagatgaacgccgtctccattcgagtgactggggtgatatcggtatggtcatcagacgtagtgaagataatggtaaaacttggggtgaccgagtaaccattaccaacttacgtgacaatccaaaagcttctgacccatcgatcggttcaccagtg
>Vaccine~~~nanA2~~~019~~~RESISTANCES~~~DESC
caagaaggggcaagtgagcaacctctggcaaatgaaactcaactttcgggggagagctcaaccctaactgatacagaaaagagccagccttcttcagagactgaactttctggcaataagcaagaacaagaaaggaaagataagcaagaagaaaaaattccaagagattactatgcacgagatttggaaaatgtcgaaacagtgatagaaaaagaagatgttgaaaccaatgcttcaaatggtcagagagttgatttatcaagtgaactagataaactaaagaaacttgaaaacgcaacagttcacatggagtttaagccagatgccaaggccccagcattc
>Vaccine~~~nanA3~~~020~~~RESISTANCES~~~DESC
aaaacttggcatgctggagaagcggtcaacgataaccgtcaggtagacggtcaaaagatccactcttctacgatgaacaatagacgtgcgcaaaatacagaatcaacggtggtacaactaaacaatggagatgttaaactctttatgcgtggtttgactggagatcttcaggttgctacaagtaaagacggaggagtgacttgggagaaggatatcaaacgttatccacaggttaaagat
>vaccine3~~~tufA~~~01~~~[Streptococcus_pneumoniae R6_spr1343]
atggcaaaagaaaaatacgatcgtagtaaaccacacgttaacattggtactatcggacacgttgaccacggtaaaactaccctaactgcagctatcacaactgttttggcacgtcgcttgccttcatcagttaaccaacctaaagactatgcgtctatcgatgctgctccagaagaacgcgaacgcggtatcactatcaacactgcgcacgttgagtacgaaactgaaaaacgtcactacgctcacatcgacgctccaggacacgcggactacgttaaaaacatgatcactggtgctgctcaaatggacggagctatccttgtagtagcttcaactgacggaccaatgccacaaactcgtgagcacatccttctttcacgtcaggttggtgttaaacaccttatcgtcttcatgaacaaagttgacttggttgacgacgaagaattgcttgaattggttgaaatggaaatccgtgacctattgtcagaatacgacttcccaggtgacgatcttccagttatccaaggttcagcacttaaagctcttgaaggtgactctaaatacgaagacatcgttatggaattgatgaacacagttgatgagtatatcccagaaccagaacgtgacactgacaaaccattgcttcttccagtcgaggacgtattctcaatcactggacgtggtacagttgcttcaggacgtatcgaccgtggtatcgttaaagtcaacgacgaaatcgaaatcgttggtatcaaagaagaaactcaaaaagcagttgttactggtgttgaaatgttccgtaaacaacttgacgaaggtcttgctggagataacgtaggtgtccttcttcgtggtgttcaacgtgatgaaatcgaacgtggacaagttatcgctaaaccaggttcaatcaacccacacactaaattcaaaggtgaagtctacatccttactaaagaagaaggtggacgtcacactccattcttcaacaactaccgtccacaattctacttccgtactactgacgttacaggttcaatcgaacttccagcaggtactgaaatggtaatgcctggtgataacgtgacaatcgacgttgagttgattcacccaatcgccgtagaacaaggtactacattctctatccgtgagggtggacgtactgttggttcaggtatggttacagaaatcgaagcttaa
>vaccine3~~~pepO~~~02~~~[Streptococcus_pneumoniae R6_spr1491]
atgacacgttatcaagatgatttttatgatgctatcaatggagaatggcaacagacagctgaaatcccagcagataagtctcaaacaggaggttttgttgatttagaccaggaaattgaagacctgatgttggcgacaacagacaagtggttagcaggtgaagaagtgcctgaggatgctatcttggaaaactttgtcaaataccaccgcctagttcgtgattttgacaagagagaagctgacggtatcacacctgtcttaccactccttaaagaattccaagaattggaaacttttgcggattttacagctaaactagcagagtttgagcttgcaggaaaaccaaacttccttccttttggtgtatcgccagactttatggatgctagaatcaatgttctatgggctagcgctccaagcacaatcttgccagatacgacctactatgcagaagaacatcctcagcgcgaagagctcttgactctttggaaagaaagcagcgcaaatctcctcaaggcttatgatttctctgatgaagaaattgaagacttgctagaaaaaagacttgaattggaccgccgagttgcggcagtggtgctctctaatgaagaaagttcagaatatgctaaactctatcatccatattcttacgaagatttcaagaaattcgcgcctgccctacctttggatgacttcttcaaagcagttattgggcaattaccagacaaggttattgtagacgaggaacgtttctggcaagcagcagagcaattctacagtgaggaatcctggtctctccttaaagcaaccttgattttgagtgttgtcaatctttcaaccagctatttaacagaggatatccgtgttttgtctggtgcctacagccgtgccctttctggagttccagaggcaaaagataaggtcaaagcagcttatcatctagcacaagaacctttcaagcaagccctggggctttggtacgcccgtgagaagttctctccagaagccaaggcggatgtggagaaaaaagtggcaaccatgattgatgtctataaggagcgtctgcttaagaatgactggctcactccagaaacctgtaaacaggctatcgtgaagctcaatgtgatcaaaccttatattggctatccagaagaattgcctgcacgttacaaggataaggtagtgaatgaaactgccagtctttttgagaatgctctagcctttgcgcgtgtggaaatcaagcacagttggagtaagtggaaccagcctgtagactataaggaatggggcatgcctgctcatatggtcaatgcctactacaatcctcagaagaacctgattgtctttccagcggccattttacaggcgcctttctatgacttgcatcagtcatcttctgctaactacggtggtattggggcagtgattgcccatgaaatttcccacgcctttgatactaacggggcttcctttgacgaaaatggtagcctcaaggattggtggacagagagcgactatgctgccttcaaggagaaaacacaaaaagtcattgaccaatttgatggacaggattcttatggagcaaccattaacggtaaattgactgtatcagaaaacgtggctgacttgggaggaatcgcagcagcgcttgaagcagctaagagagaagcagacttctcagcagaagagttcttctacaacttcggtcgcatctggcgcatgaaaggtcgtccagaatttatgaaacttttggctagcgtcgatgtgcacgcaccagccaaactccgtgtcaatgtgcaagtaccaaacttcgacgatttctttacaacctatgatgtcaaagaaggagacggaatgtggcgttcaccagaggagcgcgtgattatttggtaa
>vaccine3~~~danJ~~~03~~~[Streptococcus_pneumoniae TIGR_SP_0519]
atgaacaatactgaattttatgatcgtctgggggtatccaaaaacgcttcggcagacgaaatcaaaaaggcttatcgtaagctttccaaaaaatatcacccagatatcaacaaggagcctggtgctgaggacaagtacaaggaagttcaagaagcctatgagactttgagtgacgaccaaaaacgtgctgcctatgaccagtatggtgctgcaggcgccaatggtggttttggtggagctggtggtttcggcggtttcaatggggcaggtggcttcggtggttttgaggatattttctcaagtttcttcggcggaggcggttcttcgcgcaatccaaacgctcctcgccaaggagatgatctccagtatcgtgtcaatttgacctttgaagaagctatcttcggaactgagaaggaagttaagtatcatcgtgaagctggctgtcgtacatgtaatggatctggtgctaagccagggacaagtccagtcacttgtggacgctgtcatggcgctggtgtcattaacgtcgatacgcagactcctcttggtatgatgcgtcgccaagtaacctgtgatgtctgtcacggtcgaggaaaagaaatcaaatatccatgtacaacctgtcatggaacaggtcatgagaaacaagctcatagcgtacatgtgaaaatccctgctggtgtggaaacaggtcaacaaattcgcctcgctggtcaaggtgaagcaggctttaacggtggaccttatggtgacttgtatgtagtagtttctgtggaagctagcgacaagtttgaacgtgaaggaacgactatcttctacaatctcaacctcaactttgtccaagcggctcttggtgatacagtagatattccaactgttcacggtgatgttgaattggttattccagagggaactcagactggtaagaagttccgcctacgtagtaagggggcaccgagccttcgtggcggtgcagttggtgaccaatacgttactgttaatgtcgtaacaccgacaggcttgaacgaccgccaaaaagtagccttgaaagaattcgcggctgctggtgacttgaaagtaaatccaaagaaaaaaggcttctttgaccatattaaagatgcctttgatggagaataa
>vaccine3~~~papP~~~04~~~[Streptococcus_pneumoniae TIGR_SP_1298]
atggagatttgccaacaaattttagaaaaaattaaagaatacgacaccattatcattcatcgtcatatgaaaccagaccctgatgccttgggaagtcaggtgggattgaaagccttgctggaacatcatttcccagaaaaaaccatcaaagccgtcggttttgatgaaccaactcttacttggatggctgagatggatcttgttgaagatagagcctaccaaggcgcacttgtcatcgtctgtgatacagctaatactgctcgtatcgatgataagcgctatagtcaaggtgattttctcattaagattgaccaccatccaaatgatgatgtatacggtgacctgtcttgggtcgatactagttcaagtagcgctagcgagatgattaccctatttgcccaaacaacccaactagccttggcagatcgcgatgctgagttgctctttgcaggaattgtcggtgatacaggtcgcttcctctacccttctaccactgcacggactcttcgcctggctgcttatttgagagaacataactttgactttgcggctctcactcgcaaaatggacactatgagctacaaaattgctaaactgcaaggctacatctacgaccatctggaagtggatgaaaatggtgctgctcgcgttatcctgagtcagaaaatcttgaaacaatacaatataaccgatgctgaaactgcggccattgtaggtgcacctggacgcattgacagagtgagtctctggggaatttttgtcgaacaggctgatggccactaccgagttcgcttacgcagtaaagtccatcctatcaatgaaattgccaaggagcatgatggtggaggccaccctctagcaagtggtgctaattcctatagcctagaagaaaacgaaatcatctaccaaaagttaaaaaacttgcttaaaaactga
>vaccine3~~~pfbA~~~05~~~[Streptococcus_pneumoniae TIGR_SP_1833]
atgaaatattttgttcctaatgaggtattcagtattcgtaaattaaaggtggggacttgctcggtactattggcaatttcaattttgggaagccaaggtattttatcggatgaagttgttactagttcttcaccgatggctacaaaagagtcttctaatgcaattactaatgatttagataattcaccaactgttaatcagaatcgttctgctgaaatgattgcctctaattcaaccactaatggtttagataattcgttaagtgttaatagtatcagctctaatggtactattcgttccaattcacaattagacaacagaacagttgaatctacagtaacatctactaatgaaaataagagttataaggaagatgttataagtgacagaattatcaaaaaagaatttgaagatactgctttaagtgtaaaagattatggtgcggtaggtgatgggattcatgatgatcgacaagcaattcaagatgcaatagatgctgcagctcaagggctaggtggaggaaatgtatattttcctgaaggaacttatttagtaaaagaaattgtttttttaaaaagtcatacacacttagaattgaatgagaaagctacaattctaaatggtataaatattaagaatcacccttccattgtttttatgacaggtttatttacggatgatggtgcgcaagtagaatggggcccaacagaagatattagttattctggtggtacgattgatatgaacggtgctttgaatgaagaaggaactaaagcaaaaaatctaccacttataaattcttcaggtgcatttgctattgggaattcaaataacgtaactataaaaaatgtaacattcaaggatagttatcaagggcatgctattcaaattgcaggttcgaaaaatgtattagttgataattctcgttttcttgggcaagccttacccaaaacgatgaaggatgggcaaatcataagtaaggagagcattcagattgaaccattaactagaaaaggttttccttatgccttgaatgatgatgggaaaaaatctgaaaatgtgactattcaaaattcctattttggcaaaagtgataaatctggggaattagtaacagcaattggcacacactatcaaacattgtcgacacagaacccctctaatattaaaattcaaaataatcattttgataacatgatgtatgcaggtgtacgttttacaggattcactgatgtattaatcaaaggaaatcgctttgataagaaagttaaaggagagagtgtacattatcgagaaagcggagcagctttagtaaatgcttatagctataaaaacactaaagacctattagatttaaataaacaggtggttatcgccgaaaatatatttaatattgccgatcctaaaacaaaagcgatacgagttgcaaaagatagtgcagaatatttaggaaaagtatcagatattactgtaacaaaaaatgtaattaataataattctaaggaaacagaacaaccaaatattgaattattacgagttagtgataatttagtagtctcagagaatagtatattcgggggtaaagaaggaattgttattgaggattcaaagggtaaaataaccgttttaaataaccaattttataatttatccggtaagtatatatcattcatcaaatctaatgcaaatgggaaagaacctgttatacgtgatagcgatggtaatttcaatattgtaacggagaatgggctttacaaaattgtaacaaataatttaagtgataaaaacgaaaaagaaaaaaacaaagaggaaaaacaatctaattcaaataatgtaattgatagtaaccagaagaacggagagtttaactcaagtaaagataatagacaaatgaatgacaagatcgacaataaacaagataataagacagaagaagtaaactataaaatagttggagatggcagagaaactgaaaatcatattaataaatctaaagaaatagtagatgtaaaacaaaaattaccaaagactggttcgaataagattatggaactattcttaacagtgacaggaattggtttacttttgacactaaaagggttgaagtattatggtaaagataaataa
>vaccine3~~~prtA~~~06~~~[Streptococcus_pneumoniae R6_SPR0561]
atgaaaaaaagcacagtattgtcactaactacagctgcagttattttagcagcctatgcccctaatgaggtagtcttagcagacacatctagctctgaagatgctttaagcatctctgataaagaaaaagtagtagtagataaggaaacagaaaataaagagaaacataaagatattcataatgctatagaaacttcaaaggatactgaagaaaagaaaacaacaattattgaggaaaaagaagttgttagtaaaaatcctgtaatagacactaaaactagcaatgaagaagcaaaaatcaaagaagaaaattccaatcaatcccaaggagatcatacggactcatttgtgaataaaaacacagaaaatcccaaaaaagaagataaagttgtctatattgctgaatttaaagataaagaatctggagaaaaagcaatcaagggactatcaaatcttaagaatacaaaagttttatatacttatgatagaatttttaacggtagtgccatagaaacaactccagataacttggacaaaattaaacaaatagaaggtatttcatcgattgaaagggcacaaaaagtccaacccatgatgaatcatgccagaaaggaaattggagttgaggaagctattgattacctaaagtctatcaatgctccgtttgggaaaaattttgatggtagaggtatggtcatttcaaatatcgatactggaacagattatagacataaggctatgagaatcgatgatgatgccaaagcctcaatgagatttaaaaaagaagacttaaaaggaactgataaaaattattggttgagtgataaaatccctcatgcgttcaattattataatggtggcaaaatcactgtagaaaaatatgatgatggaagggattattttgacccacatgggatgcatattgcagggattcttgctggaaatgatactgaacaagatatcaaaaactttaacggcatagatggaattgcacctaatgcacaaattttctcttacaaaatgtattctgacgcaggatctgggtttgcgggtgatgaaacaatgtttcatgctattgaagattctatcaaacacaacgttgatgttgtttcggtatcatctggttttacaggaacaggtcttgtaggtgagaaatattggcaagctattcgggcattaagaaaagcaggcattccaatggttgtcgctacgggtaactatgcgacttctgcttcaagttcttcatgggatttagtagcaaataatcatctgaaaatgaccgacactggaaatgtaacacgaactgcagcacatgaggatgcgatagcggtcgcttctgctaaaaatcaaacagttgagtttgataaagttaacataggtggagaaagttttaaatacagaaatataggggcctttttcgataagaataaaatcacaacaaatgaagatggaacaaaagctcctagtaaattaaaatttgtatatataggcaaggggcaagaccaagatttgataggtttggatcttaggggcaaaattgcagtaatggatagaatttatacaaaggatttaaaaaatgcttttaaaaaagctatggataagggtgcacgcgccattatggttgtaaatactgtaaattactacaatagagataattggacagagcttccagctatgggatatgaagcggatgaaggtactaaaagtcaagtgttttcaatttcaggagatgatggtgtaaagctatggaacatgattaatcctgataaaaaaactgaagtcaaaagaaataataaagaagattttaaagataaattggagcaatactatccaattgatatggaaagttttaattccaacaaaccgaatgtaggtgacgaaaaagagattgactttaagtttgcacctgacacagacaaagaactctataaagaagatatcatcgttccagcaggatccacatcttgggggccaagaatagatttacttttaaaacccgatgtttcagcacctggtaaaaatattaaatctacgcttaatgttattaatggcaaatcaacttatggctatatgtcaggaactagtatggcgactccaatcgtggcagcttctactgttttgattagaccgaaattaaaggaaatgcttgaaagacctgtattgaaaaatcttaagggagatgacaaaatagatcttacaagtcttacaaaaattgccctacaaaatactgctcgacctatgatggatgcaacttcttggaaagaaaaaagtcaatactttgcatcacctagacaacagggagcaggcctaattaatgtggccaatgctttgagaaatgaagttgtagcaactttcaaaaacactgattctaaaggtttggtaaactcatatggttccatttctcttaaagaaataaaaggtgataaaaaatactttacaatcaagcttcacaatacatcaaacagacctttgacttttaaagtttcagcatcagcgataactacagattctctaactgacagattaaaacttgatgaaacatataaagatgaaaaatctccagatggtaagcaaattgttccagaaattcacccagaaaaagtcaaaggagcaaatatcacatttgagcatggtactttcactataggcgcaaattctagctttgatttgaatgcggttataaatgttggagaggccaaaaacaaaaataaatttgtagaatcatttattcattttgagtcagtggaagaaatggaagctctaaactccaacgggaagaaaataaacttccaaccttctttgtcgatgcctctaatgggatttgctgggaattggaaccacgaaccaatccttgataaatgggcttgggaagaagggtcaagatcaaaaacactgggaggttatgatgatgatggtaaaccgaaaattccaggaaccttaaataagggaattggtggagaacatggtatagataaatttaatccagcaggagttatacaaaatagaaaagataaaaatacaacatccctggatcaaaatccagaattatttgctttcaataaccaagggatcaacgctccatcatcaagtggttctaagattgctaacatttatcctttagattcaaatggaaatcctcaagatgctcaacttgaaagaggattaacaccttctccacttgtattaagaagtgcagaagaaggattgatttcaatagtaaatacaaataaagagggagaaaatcaaagagacttaaaagtcatttcgagagaacactttattagaggaattttaaattctaaaagcaatgatgcaaagggaatcaaatcatctaaactaaaagtttggggtgacttgaagtgggatggactcatctataatcctagaggtagagaagaaaatgcaccagaaagtaaggataatcaagatcctgctactaagataagaggtcaatttgaaccgattgcggaaggtcaatatttctataaatttaaatatagattaactaaagattacccatggcaggtttcctatattcctgtaaaaattgataacaccgcccctaagattgtttcggttgatttttcaaatcctgaaaaaattaagttgattacaaaggatacttatcataaggtaaaagatcagtataagaatgaaacgctatttgcgagagatcaaaaagaacatcctgaaaaatttgacgagattgcgaacgaagtttggtatgctggcgccgctcttgttaatgaagatggagaggttgaaaaaaatcttgaagtaacttacgcaggtgagggtcaaggaagaaatagaaaacttgacaaagacggaaataccatttatgaaattaaaggtgcaggagatttaagaggaaaaatcattgaagtcattgcattagatggttctagcaatttcacaaagattcatagaattaaatttgctgatcaggctgatgaaaaggggatgatttcttattacctagtagatcctgacaaagatgcttctaaatatgaaaaacttggtgaaatttctgaagataaactcaaaaatgcaaagagcccagaggaaaataccaataataatcaagctaaggatgaagattcaaaaccagatgaaaaaagttcagttgagggagaagctagccttgaaataaataaaactatttcaacaattagagagtttgaaaataaagacctaaagaaactcattaaaaagaaatttagagaagttaatgattttacaagtgaaactggtaagagaatagaggaatacgattataaatacgatgataagggaaatattattgcttatgacgatggtagtgccttacaatatgaaactgaaaaatttgacgaaataaaatcaaaaatttatggtgttctaagcccatctaaagatggacactttgaaattcttggaaagataagcaatgtttctaaaaatgccaaggtatattatggaaatagctataaatcgatagaaatcaaagcgactaagtatgattcacattcaaaaacgatgatatttgatttatacgctaatattaatgatattgtagatggattagcttttgctggagatatgagattatttgttaaagatgacaatcaaataaaagctgaaactaagattagaatgcctgaaaaaaataaggaaactaaagcagaatatccctatgtatcaagttatgggaatgtaatcgaattaggagaaggagatctttcaaagaacaaaccagacaatttaactaaaatggaatctggtaaaatctattctgattcagaaaaacaacaatatctgttaaaggataacatcattctaagaaaaggctatgcactaaaagtgactacctataatcctggaaaaacggatatgttagaaggaaatggagtctatagcaaggaagatatagcaaaaatacaaaaggccaatcctaatctaagagtcctttcagaaacaacaatttatgctgatagtagaaatgttgaagatggaagaagtacccaagctgtattaatgtcggctttggacggctttaacattataaggtatcaagtgtttacatttaaaatgaacgataaaggggaagctatcgataaagacggaaatcttgtgacagattcttctaaacttgtattatttggtaaggatgataaagaatacactggagaggataagtccaatgtagaagctataaaagaagatggctccatgttatttattgataccaaaccagtaaacctttcaatggataagaactactttaatccatctaaatctaataaaatttatgtacgaaatccagaattttatttaagaggtaagatttctgataagggtggttttaactgggaattgagagttaatgaatcggttgtagataattatttaatctacggagatttacacattgataacactagagattttaatattaagctgaatgttaaagacggtgacatcatggactggggaatgaaagactataaagcaaacggatttccagataaggtaacagatatggatggaaatgtttatcttcaaactggctatagcgatttgaatgctaaagcagttggagtccactatcagtttttatatgataatgttaaacctgaagtaaacattgatcctaagggaaatactagtatcgaatatgctgatggaaaatctgtagtctttaacatcaatgataaaagaaataatggattcgatggtgagattcaagaacaacatatttatgtaaatggaaaagaatatacatcatttgatgatattaaacaaataacagacaagacactaaacattaagattgttgtaaaagattttgcaagaaatacaaccgtaaaagaattcattttaaataaagatacgggagaggtaagtgaattaaaacctcatagggtaactgtgaccattcaaaatggaaaagaaatgagttcaacgatagtgtcggaagaagattttattttacctgtttataagggtgaattagaaaaaggataccaatttgatggttgggaaatttctggtttcgaaggtaaaaaagacgctggctatgttattaatctatcaaaagatacctttataaaacctgtattcaagaaaatagaggagaaaaaggaggaagagaataaacctacttttgatgtatcgaaaaagaaagataacccacaagtaaatcatagtcaattaaatgaaagtcacagaaaagaggatttacaaagagaagatcattcacaaaaatctgattcaactaaggatgttacagctacagttcttgataaaaacaatatcagtagtaaatcaactactaacaatcctaataagttgccaaaaactggaacagcaagcggagcccagacactattagctgccggaataatgtttatagtaggaatttttcttggattgaagaaaaaaaatcaagattaa
>vaccine3~~~pvaA~~~07~~~[Streptococcus_pneumoniae R6_spr0930]
atgtttaaacgaattcgaagagtgcttgtactagcagtcttcctttttgctggctataaagcttaccgcgttcatcaagatgtcaaacaagtcatgacctatcaacccatggtgcgagaaatgttgagtgaaaaagacaccccagcaaacgaagagcttgtgcttgctatgatttatactgaaacaaaaggaaaagaaggcgatgttatgcagtctagtgagtctgcaagtggttccaccaacaccatcaatgataatgcctctagcattcggcaaggcattcaaactctgacaggcaatctctatctggcgcagaagaagggtgtagatatctggacagctgttcaagcctataattttggacctgcctatatcgattttatcgcccaaaatggcaaggaaaataccttggctctagccaaacagtactctcgtgagactgttgcccccttgcttggtaataggactggaaagacttatagttatattcaccccatttccatttttcacggtgctgaactctatgtaaatggaggaaactattattattctagacaggtacgacttaacctttacatcatcaaatgtttcactctcttttcaacatctggctag
>vaccine3~~~gndA~~~08~~~[Streptococcus_pneumoniae TIGR4_sp0375]
atgacaaaagctaactttggtgtcgtaggtatggccgtaatgggtcgtaaccttgcccttaatattgaatctcgtggttacacagttgctatctacaaccgtagtaaagaaaaaacggaagatgtgattgcttgccatcctgaaaagaactttgtaccaagctatgacgttgaaagttttgtaaactcaatcgaaaaacctcgtcgtatcatgctgatggttcaagctggacctggtacagatgctactatccaagcccttcttccacaccttgacaagggtgatatcttgattgacggaggaaatactttctacaaagataccatccgtcgtaatgaagaattggcaaactctggtatcaactttatcggtactggggtttctggtggtgaaaaaggtgcccttgaaggtccttctatcatgcctggtggacaaaaagaagcctacgaattggttgcggatgttcttgaagaaatctcagctaaagcaccagaagatggcaaaccatgtgtgacttacatcggtcctgatggagctggtcactatgtgaaaatggttcacaatggtattgagtacggtgatatgcaattgatcgcagaaagctatgacttgatgcaacacttgctaggcctttctgcagaagatatggctgaaatctttactgagtggaacaagggtgaattagacagctacttgattgaaatcacagctgatatcttgagccgtaaagacgatgaaggccaagatggaccaatcgtagactacatccttgatgctgcaggtaacaagggaactggtaaatggactagccaatcatctcttgaccttggtgtaccattgtcactgattactgagtcagtgtttgcacgctacatttcaacttacaaagaagaacgtgtacatgctagcaaggtgcttccaaaaccagctgccttcaactttgaaggagacaaggctgaattgattgaaaagatccgtcaagccctttacttctcaaaaatcatttcatacgcacaaggatttgctcaattgcgtgtagcctctaaagaaaacaactggaacttgccatttgcagatatcgcatctatctggcgtgatggctgtatcatccgttctcgtttcttgcaaaagattacagatgcttacaaccgcgatgcagatcttgccaaccttcttttggacgagtacttcttggatgttactgctaagtaccaacaagcagtacgtgatatcgtagctcttgcggttcaagcaggtgtgccagtgccaactttctcagcagctattacttactttgatagctaccgttcagctgaccttccagctaacttgatccaagcacaacgtgactactttggtgctcacacttaccaacgtaaagacaaagaaggaaccttccactactcttggtatgacgaaaaataa
>vaccine3~~~clpP~~~09~~~[Streptococcus_pneumoniae R6_spr0656]
atgattcctgtagttattgaacaaacaagccgtggagaacgttcttacgatatttactcacgtcttctcaaagaccgcatcattatgctgacaggtccggttgaagacaatatggctaactctgttattgcccaactgcttttcttggatgcccaagatagtacaaaagatatttacctttatgtcaatacaccaggtggttctgtttcagctggtttggcaatcgtagataccatgaactttatcaaggcagatgtccaaaccattgttatgggaatggctgcatctatgggaacagtcatcgcatcaagtggagcaaaaggcaaacgtttcatgcttccaaatgctgaatacatgattcaccaaccaatgggcggtacaggtggtggtacccaacaaactgatatggctatcgctgcagaacacttgctcaaaactcgtaataccttggaaaaaatcttggctgaaaattcaggtcagtcaatggaaaaagtccatgcagatgcagaacgtgataactggatgagcgcccaggaaacacttgaatatggctttattgatgaaattatggccaacaattcattgaactaa
>vaccine3~~~ppmA~~~10~~~[Streptococcus_pneumoniae R6_spr0884]
atgaagaaaaaattattggcaggtgccatcacactattatcagtagcaactttagcagcttgttcgaaagggtcagaaggagcagaccttatcagcatgaaaggggatgtcatcacagaacatcaattttatgagcaagtgaaaaacaacccttcagcccaacaagtcttgttaaatatgaccatccaaaaagtttttgaaaaacaatatggctcagagcttgatgataaagaggttgatgatactattgccgaagaaaaaaaacaatatggcgaaaactaccaacgtgtcttgtcacaagcaggtatgactcttgaaacacgtaaagctcaaattcgtacaagtaaattagttgagttggcagttaagaaggtagcagaagctgaattgacagatgaagcctataagaaagcctttgatgagtacactccagatgtaacggctcaaatcatccgtcttaataatgaagataaggccaaagaagttctcgaaaaagccaaggcagaaggtgctgattttgctcaattagccaaagataattcaactgatgaaaaaacaaaagaaaatggtggagaaattacctttgattctgcttcaacagaagtacctgagcaagtcaaaaaagccgctttcgctttagatgtggatggtgtttctgatgtgattacagcaactggcacacaagcctacagtagccaatattacattgtaaaactcactaagaaaacagaaaaatcatctaatattgatgactacaaagaaaaattaaaaactgttatcttgactcaaaaacaaaatgattcaacatttgttcaaagcattatcggaaaagaattgcaagcagccaatatcaaggttaaggaccaagccttccaaaatatctttacccaatatatcggtggtggagattcaagctcaagcagtagtacatcaaacgaatag
>vaccine3~~~eng~~~11~~~[Streptococcus_pneumoniae TIGR4_sp0368]
atgaataaaggattatttgaaaaacgttgtaaatatagtattcggaaattttcattaggtgttgcttctgttatgattggagctgcattctttgggacaagtccggttcttgcagatagcgtgcagtctggttccacggcgaacttaccagctgatttagctactgctcttgcaacagcaaaagagaatgatgggcgtgattttgaagcgcctaaggtgggagaagaccaaggttctccagaagttacagatggacctaagacagaagaagaactattagcacttgaaaaagaaaaaccggctgaagaaaaaccaaaagaggataaacctgcagctgctaaacctgaaacacctaagacggtaacccctgaatggcaaacggtagcgaataaagagcaacagggaacagtcactatccgagaagaaaaaggtgtccgctacaaccaactatcctcaactgctcaaaatgataacgcaggcaaaccagccctgtttgaaaagaagggcttgaccgttgatgccaatggaaatgcaactgttgatttaaccttcaaagatgattctgaaaagggcaaatcacgctttggtgtctttttgaaatttaaagataccaagaataatgtttttgtcggttatgacaaggatggctggttctgggagtataaatctccaacaactagcacttggtatagaggtagtcgtgttgctgctcctgaaacaggatcaacaaaccgtctctctatcactctcaagtcagacggtcagctaaatgccagcaataatgatgtcaatctctttgacacagtgactctaccagctgcggtcaatgaccatcttaaaaatgagaagaagattcttctcaaggcgggctcttatgacgatgagcgaacagttgttagcgttaaaacggataaccaagagggggtaaaaacagaggatacccctgctgaaaaagaaacaggtcctgaagttgatgatagcaaggtgacttatgacacgattcagtctaaggtcctcaaagcagtgattgaccaagccttccctcgtgtcaaggaatacagcttgaacgggcatactttgccaggacaggtgcaacagttcaaccaagtctttatcaataaccaccgaatcacccctgaagtcacttataagaaaatcaatgagacaacagcagagtacttgatgaagcttcgcgatgatgctcacttaatcaatgcggaaatgacagtacgcttgcaagttgtagacaatcaattgcactttgatgtgactaagattgtcaaccacaatcaagtcactccaggtcaaaagattgatgacgaaagcaaactactttcttctattagtttcctcggcaatgctttagtctctgtttctagtaatcaaactggtgctaagtttgatggggcaaccatgtcaaacaatacgcatgtcagcggagatgatcatatcgatgtaaccaatccaatgaaggatttggctaagggttacatgtatggatttgtttctacagataagcttgctgctggtgtttggagtaactctcaaaacagctatggtggtggttcgaatgactggactcgtttgacagcttataaagaaacagtcggaaatgccaactatgtaggaatccacagctctgaatggcaatgggaaaaagcttataagggcattgttttcccagaatacacgaaggaacttccaagtgctaaggttgttatcactgaagatgccaatgcagacaagaacgttgattggcaagatggtgccattgcttatcgtagcattatgaacaatcctcaaggttgggaaaaagttaaggatatcacagcttaccgtatcgcgatgaactttggttctcaagcacaaaacccattccttatgaccttggatggtatcaagaaaatcaatctccatacagatggtcttgggcaaggtgttctccttaaaggatatggtagcgaaggccatgactctggtcacttgaactatgctgatattggtaagcgtatcggtggtgtcgaagacttcaagaccctaattgagaaggctaagaaatatggagctcatctaggtatccacgttaacgcttcagaaacttatcctgagtctaaatacttcaatgaaaaaattctccgtaagaatccagatggaagctatagctatggttggaactggctagatcaaggtatcaacattgatgctgcctatgacctagctcatggtcgtttggcacgttgggaagatttgaagaaaaaacttggtgacggtctcgactttatctatgtggacgtttggggtaatggtcaatcaggtgataacggtgcctgggctacccacgttcttgctaaagaaattaacaaacaaggctggcgctttgcgatcgagtggggccatggtggtgagtacgactctaccttccatcactgggcagctgacttgacctacggtggctacaccaataaaggtatcaacagtgccatcacccgctttatccgtaaccaccaaaaagatgcttgggtaggggactacagaagttatggtggtgcagccaactatccactgctaggtggctacagcatgaaagactttgaaggctggcagggaagaagtgactacaatggctatgtaaccaacttatttgcccatgacgtcatgactaagtacttccaacacttcactgtaagtaaatgggaaaatggtacaccggtgactatgaccgataacggtagcacctataaatggactccagaaatgcgagtggaattggtagatgctgacaataataaagtagttgtaactcgtaagtcaaatgatgtcaatagtccacaatatcgcgaacgtacagtaacgctcaacggacgtgtcatccaagatggttcagcttacttgactccttggaactgggatgcaaatggtaagaaactttctactgataaggaaaagatgtactacttcaatacgcaggccggtgcaacaacttggacccttccaagcgattgggcaaagagcaaggtttacctttacaagctaactgaccaaggtaagacagaagagcaagaactaactgtaaaagatggtaaaattaccctagatcttctagcaaatcaaccatacgttctctatcgttcgaaacaaactaatcctgaaatgtcatggagtgaaggcatgcacatctatgaccaaggatttaatagcggtaccttgaaacattggaccatttcaggcgatgcttctaaggcagaaattgtcaagtctcaaggggcaaacgatatgcttcgtattcaaggaaacaaagaaaaagttagtctcactcagaaattaactggcttgaaaccaaataccaagtatgccgtttatgttggtgtagataaccgtagtaatgccaaggcaagtatcactgtgaatactggtgaaaaagaagtgactacttataccaataagtctctcgcgctcaactatgttaaggcctacgcccacaatacacgtcgtgacaatgctacagttgacgatacaagttacttccaaaacatgtacgccttctttacaactggagcggacgtctcaaatgttactctgacattgagtcgtgaagctggtgatcaagcaacttactttgatgaaattcgtacctttgaaaacaattcaagcatgtacggagacaagcatgatacaggtaaaggcaccttcaagcaagactttgaaaatgttgctcagggtatcttcccatttgtagtgggtggtgtcgaaggtgttgaagataaccgcactcacttgtctgaaaaacacaatccatatacacaacgtggttggaatggtaagaaagtcgatgatgttatcgaaggaaattggtcactcaagacaaatggactagtgagccgtcgtaacttggtttaccaaaccatcccacaaaacttccgttttgaagcaggtaagacctaccgtgtaacctttgaatacgaagcaggatcagacaatacctatgcttttgtagtcggtaagggagaattccagtcaggtcgtcgtggtactcaagcaagcaacttggaaatgcatgaattgccaaatacttggacagattctaagaaagccaagaaggcaaccttccttgtgacaggtgcagaaacaggcgatacttgggtaggtatctactcaactggaaatgcaagtaatactcgtggtgattctggtggaaatgccaacttccgtggttataacgacttcatgatggataatcttcaaatcgaagaaattaccctaacaggtaagatgttgacagaaaatgctctgaagaactacttgccaacggttgccatgactaactacaccaaagagtctatggatgctttgaaagaggcggtctttaacctcagtcaggccgatgatgatatcagtgtggaagaagcgcgtgcagagattgccaagattgaagctttgaagaatgctttggttcagaagaagacggctttggtagcagatgactttgcaagtcttacagctcctgctcaggctcaagaaggtcttgcaaatgcctttgatggcaatgtgtctagtctatggcatacatcttggaatggtggagatgtaggcaagcctgcaactatggtcttgaaagaaccaactgaaatcacaggacttcgctatgttccgcgtggatcaggttcaaatggtaacttgcgagatgtgaaacttgttgtgacagatgagtctggcaaggagcatacctttactgcaactgattggccaaataacaacaaaccaaaagatattgactttggtaagacaatcaaggctaagaaaattgtccttactggtaccaagacatacggagatggtggagataaataccaatctgcagcggaacttatctttactcgtccacaggtagcagaaacacctcttgacttgtcaggctatgaagcagctttggttaaggctcagaaattaacagacaaagacaatcaagaggaagtagctagcgttcaggcaagcatgaaatatgcgacggataaccatctcttgacggaaagaatggtggaatactttgcagattatctcaaccaattaaaagattctgctacgaaaccagatgctccaactgtagagaaacctgagtttaaacttagatctttagcttccgagcaaggtaagacgccagattataagcaagaaatagctagaccagaaacacctgaacaaatcttgccagcaacaggtgagagtcaatctgacacagccctcatcctagcaagtgttagtctagccctatctgctctctttgtagtaaaaacgaagaaagactag
>vaccine3~~~pcpA~~~12~~~[Streptococcus_pneumoniae TIGR4_sp2136]
ctatcctacccactcaccgttagcattgactcgatagccatcgggtgtagtcgtgtttactaataaatctcctgaattataggtatagtaccatttaccagaaactgtaacccaaccagtagccattgaacctgattcatttaagtaataccataagcctttgtctttaacccaaccagtagccattgaacctgattcatttaagtagtaccataagcctttgtctttaacccaaccagtagccattgaacctgattcgtttaagtaataccataagcctttgtctttaacccaaccagtagccattgaacctgattcatttaagtagtaccataagcctttgtctttaacccaaccagtagccattgaacctgattcgtttaagtaataccataaacctttgtctttaacccaaccagtagccattgaacctgattcgtttaagtaataccataaacctttgtctttaacccaaccaactactccctgattagaattctttttaggtttagctacatcagtttcttgttttatattatctactttttcaacaatgatatcattactagtagataaatttgatttaagaacatcttttatatgttctgatgttacatagaacttaacagtttcaggaattgcaaatgtatcttttttcacagaaaactctgtacttttattcttaatatgaatttcctttaatgaatctaagacgccacttaggaagaaggacggcaatgagttgatattattaccaattgttaaactttttaattttggtaaaccgttcataacgtgtttaccaaaatttttaacattatctggtaatataagttcttttaattctaaattaccgtaaaaggctaaacgttcaatagtttctaaactatttggtaagctaatttcttcaagtttaatcgcatctgcaaatgcaaaagtaccgattttttctaaaccttcattcaattcgagttttttcaagtaagaatttttattaaacgaatatgatgcaagttcttttgtctccttaggcgttttataactttcgtcatttttttgacttggataataaattaattgggttttatcttttgaaaacaaaacaccatcaactgaggcaaacgattcatttccttcttcaacatcaacatgttttaagctagtagtgagtctaaatagattacttcctaatgttttaaccgattttggtaatgttagtttctctaaatttgataaattagcaaaagcctcatgtgatattaattctaattttgaacttgaggaaaaggttagctttttcaatttttgactaaaagaaaatgcacttgttccaatatattctagagatgcaggcaattcaatctcttctaattcagaaaaatcaaaagctctatcttcaattttctccagctgactgcctttgtcaaaaataatagttttagctttacttccatggaagccttttttttgtattttttttatgcttgatgggatagtaatagagctaggatagtagacaattctacctgtttcatctggataataactaaaagcttgactagctacttcagtaacggtaaatactttatcacctactgtgatttttgtaggaatcgtgaatggttttccatcttgaccagcttcaaactctacaggagtaactccattacccacttgaacagttcctatgttaccttctacagttagaaccttatatttgatattattttgttgaataatacttccaactttagtctctttgattacttccgaactaggagtatctgctaggattggttcattagggacatatgctgctaaaataaccgcagctgtagttaatgataatattgtagtttttttcat
>vaccine3~~~PcsB~~~13~~~[Streptococcus_pneumoniae TIGR4_SP2216]
ttaatctgcataaatatatgtaacaaaaccttcagaagttgttgttggattgaaccatccacggtgatttccaattgtacgattacctgcataatttgattctgatacttggatacgtgttgttgattcaacagctgtaacaaccgctacgtgaccatatccaccatcattccaacatgcaattgctccaacttgaggtgttgaacctgtacggaaacctgctgctgctgcacttgtagcccactgtgctccattaccccagtagtctccagcccaaggtgccaatgtttttactccccatgtacattctccaattggataacttgaagcgtttgtactgtatgttggacgaacttttgcacggacaggtgctgctgcagattcagatactgcttgcacttgagctgttaagttagtgtttgctgaagcaagtactgattgttgttggctagctcgtttttctttataagctgcttctgctaccgcagctgcacgagcctctgcctcagctgctgctttttgctctaatagacttgctttttccccttcagctgtcgctttctcagcagcaagacttaattcagcagcttttagttctgcctgtttcgtagtcaatgcttgagcatcatcagccaatttttgttgattagcaattacagtattgatagcatcattatttgctacttgtttttcagaaatagcttttttatctgccttttgttgttctaacattttgttgtttgcagatacgatttcactcattgcagcaacacgtgaaatagcttctgtaattgattttgagtttacaatggtattgatatagctagttacggctccatttgtttgagcactacgagcttgtttttccaacgattggttacgagaaacaatgtttttagaaagttctgtaatctcaccctcgagtttcttagattctgcttgtaatctatcattttcagcttgcaagttagactgctcagcttgaatagctgatacttgctcctgaatttggtcaacttgtttttgggcttcttgttgttgtgctgttaagttactaattttattatcttgagcagcaattttgtcatcagtcgtttctgcatgcgcagttgttaaaacagctacttgagaaaccattactgtacttaataaaagtgacgctaagatttttttcttcat
>vaccine3~~~StkP_pknB~~~14~~~[Streptococcus_pneumoniae TIGR4_SP1732]
ttaaggagtagctgaagttgttttaggtttgtagattgaaatcttgactctagtcttattgaggtctaccttttcacctgctctaggactttgttcaacaaccatgccttctgcactacctgcaggcgctgtcgtcacttctacaacttctatattagcttccttaatcccaacaatttgaatcaaattgttcttagtaaactccaagctagaaccaatgtaactcggcatggcaacacttgtaacttttttagctactgtcaagacaatttgagtaggtttactcacatcataagtcgttccggcacctggactttgtttcataatcgttcctggttcgctttcgctggactcttcttcctctatcttaatcaaattctcaggaaccttcttctgcttgagttctgagattacttctgtagagttccgtccaatatagttccctaattgaatcgtcgtagcttttttagctactgtcaaaacaatttgagttgccttgctcaagtcataggtcgtaccttctggtagactttgcttcaggaccgttccagcctcactctcattcgactcttcttcctcaattttaatcaaattatctggaacttttttctcttttaattccgcaatgacatcagaggatttccgaccgacataattactaatttggaaagattgcttgcctgatgagacaaccaaattgattttcgttccttcttttcgaccagttccagcgccaggatctgtacggataatccgcccttcttccaccttttcactagcctctgtcttctcctcaccaatctcaaaattggcttttttgagcgttgccttggcctctgcaactgtctgacctgccacatctggaatggcaatggttgcaggagttctggatagtatccaaataagagaagctgccaccaatacaaggctggccaacaaaatcaggtaacgcatcttaaatctatgttttttcggtgcttgtggttggtaagtttcctctgtcacagcctggcttgggtttttgattgatttgtgttctgtttgcgcttgaaccttaggaatagatgtcaaggtactctgagaaaccttcggcaaggtcttggtatctgccttgctcgtttcatcaaagattaacttactttcatttctacgattgtaggacaagctactagacaagtccacatacatctctgaaaccgagcggtagcgattggtcaactttttagcagttgccttgataataacattttctaaagcctgaggtacagatggattttctgcaataacggacggcaggggtttctggaaatgctggagggcaatggtcaccgcgctatccccgtcataagggatatggcctgtcagcatctcatagaaaataatccccatggcatagatatcactctgcacagtcgccttcgaaccacgcgcctgctctggtgacaagtaatgaactgagcccaacatcgagttagtctgggtcagacttgtctctgcaaaggctacagcaatcccaaagtctgtgaccttggcagtcccatctggtgtcaagaggatattttgaggtttcaagtccctgtgaacaattcctcgagtatgggccaagcgcatagccaagagaatttgtcccatgatacggactgcttcttcattagaaagaggataatgttccttgatatagcgtttgaggtccagtccagccacatactccatagctaggtactgttgaccgtcttcctcgccaatatctgttatccgaacgatatgaggatggtctagatctgccatagctctcgcttcacgctgaaaacgagctacagctatcgggtccgtctggtagttggtcctcagaaccttcactgccacttcttccccatctaagattaagtctttggctaggtagacatccgccatacctcctcgaccaatctgtttgacaatccgatagcgtccggcaaaaatcttgccgatttggatcat
>vaccine3~~~potD~~~15~~~[Streptococcus_pneumoniae TIGR4_sp1386]
ctacttccgatacattttaaactgtaggaagaggtcgctatatttccctgtccatttatggtcaaatttctcataaacttctaggtgtttcatggtttcaacatcgggatagaaggccttatcttcctttgtttcctctgggagcaattccttcgctggtaggtttggtgttgaatagccgacatactccgcattttggagagcattttcaggtttcaacataaagttgataaaggcataggctgagttttggtttttaactgttttgggaatgaccatattgtcaaaccaaagattgctggcctctgtcggtaccacataacgtagattttcatttttttctaacatttggctggcttcaccagagaaggtcacgccgattgcaacattattctgaatcatatagcccttcatctcgtccgcaacgatagccttgatatttggagtcagtttgtagagcttatccactgtctcttccaactgctgcagatccttggagttgaggctgtagccgagggaattgagtcctagtcccagcacctcacgcgccccatcaaagagcatgatagaattcttatactccggcttccaaaggtcatcccaatgctcaggcgcttcatctaccatggtttcgttgtagacaattcctaaggttccccagaagtaagggatggagaatttattacctgggtcaaaggactggttgagaaactctggtccgatattttcgattccttcaatttttgaataatcaagcggaaccaagaggtcttcgtccttcatcttgttaatcatgtattcacttggaatggcaatatcgtaggtcgttccaccctgctttatcttagtgtacatggcttcgttggagtcaaaagtctcgtactgaacttgaattcctgtttcttctgtaaactgagtcaagagttcaggatcgatatagtctccccagttatagataaccaatttttgactatctcgactattgattttactatctaaatgagtcgcaattccccacaagacaaggataatcgctgcaattcctgctaaaaatgaatagatttttttcat
>vaccine3~~~pgdA~~~16~~~[Streptococcus_pneumoniae TIGR4_sp1479]
ttattcatcacgactatagtacagctcatgagcttttaggcgagtattgagcatctctggtatggtcacaaaggtataaccttgatttttcaaatactcaatgacccttggcaaggcattgactgtcggactgtgaatatcatgcatcaaaacgatagagccattagctacttgatactgaatttctgtcaaaatagatgcttcatttttactcttccagtccagactatccacatcccacatgataaagctcaaatccaagctattgcgaatatcatctgtaatagcaccataaggtggacgcatgagtttagaactagaacccagcactttagttagcacatcctcagtatcagtaatctgctttttagcttcatcaagagagagttgcgagagaatcggatggctccagctatggtttccaacaacatgaccttcagattttatcctcttcaccaagtcctcattcccagaaacatttttcccaagcacaaagaaagtcgctttaatatcatatttagctagggtctctaatacctgcggggtcgttgctggatttggaccatcatcaaaggttagagcgacaactttttgatgtttcttatcaaagtaagattggtacaaggccgcatctttttcgagtaagtacgaagattggataacatcaaagaaagcagatactggcaaggctatctcttctaaattttcaaccacaggacttggataaaggataatctgactatccttgtaatcaaaattccatgcagacaagtcttggtcagagaagttttttacaatctgctcactctggtcttgctctatttttttatcctctatgaaggaggtcaactcttttatcagctgttccttagccttactagcatctgaaaacagttggtcaagtgtaaaaggttgcccatcttctgttaagtgaacctttcctagactggtcttttcagtctcttcaatcttaaaagcaactaaatcatagatttgtttggtcacattacgattaacgactccctttaaacctgactcttcttgctctgtatagtagaaaacaagattgtccttactttctagcttgtccttaacatcttgatttatcagctccctaacagaggaaatcactttctccccttggagaggataataggcaatcacttcggcttgcccctgacgaaaatgctccttctgatttccctcactcaattgatcatctttctcttttttgagcgattcaatcttttgctcaaaacttttttgctggtagatcttaaaagcaataaatccgcctaataggcaaatagaaattgctaaaataccaatcaaagccaa
>vaccine3~~~strH~~~17~~~[Streptococcus_pneumoniae TIGR4_sp0057]
ttagtcttcttttcttttagtgagtccataggctgctagtgtggacatgagtcctgcgactactagtcctgcagaatcgtgagttcctgtttcaggaagttttttctctgttaccacaggagctggatcttgaggaagaactttgctttcctcagcaggagcagttgatggagctggttggcttgggatttctagttttggtttttcttcagcaatagcggcttgtccgttttcatcgcctacatgtgttaccatagttccgacttcgactatttgagtaacggcttcctgtgctacgacactatttacaagtgttttcacttccttaccatcggcagaagtgctcacagagtagaagttgctacgatgtccattgacgcccttagtaatgacttgtgtttttcctttgagtaagagtggattttcacaagtcactgtggtaaatggaatttcttcttcttggatatccagtctaggttttacctcagtagttggtgcaagaccactttcatcacccttgtgagttacaggagcgccaacttcaaccacttggtttataacttctttggttacctggctatcaaggactgtttctgttgtttttccattttcagtgagtacagagatgtaatgagttcgttcacctttgactcctgctgtgataatattttcctgaccggctgggaggttaggattttctttcttgataacttcaaatggaatttcttcagttcttgtgatgagttctggtctggtttcaacattggcagccacttcattttcatctaggcttcctgaatgagttacagctggtttgaggccttgaagagcggcttttaggttggctacaagcgtgtcaagctcagcttgtttattacggttgaggttgtaatttagagctgttttagctgcgtcaagggcctcaagactttctttactatatccttctaagtttgtaggaattttagctaattcttcgcggagagcattataattagcacgaaagtagtctttgttgtggtctgcaaaggcagtcatgagttcaaagatttcctcttccttgtattcagcgcttggtctatctgcccagattgaaagcatacttccgactgttggaagatctacttcaggatatttggtagaagctagttgattgaatggtgtttttccagtattctcaatagctttcttgaggaaaccaccaccatcttctggtttttgaccaagaatgtagtaccagtcaccgttggtattcaagaatttatagcctttgcttgctaggtattgaggtgatgcgaggttatatccccaccagcctttagaccagtaagaaatcaagacatctttgtcaaactgaacatcgtccttgtcttcatagtagaagccatcgttgaaggccattggttgaagccctctttctttggccatagctgcgagggtgttggcatattcggcaaatttgccatagagttgataccacttgaggtagtaccagccttgggcactagtcgcatcgttggcgtattcgtcagtaccaaagttgaaaatctttgttttacctgcaaagaagtccatgtatttaccgatgagggcttttacaaagttcatcgcttcttcgtttttcaagtccatagttgtttttgaaactttatcaaagtgggcttgaggatttttaatacctaatttttccatggcaaccagcatagcatccatgtgacctggactgttaatagctgggatgagaccgatgtccttagatttagcgtattcaattagctctgttacttctgcctgtgttagtgcagtaccgtttggatcgtcgtagtaagctttagttccttcgataatagcttttttaacgtcatcactagcataggtttttccgttggcagtaatggtcatatcatcgagtagaaagcgaagtccgtcatttcctagaaggagatggacatcagaatatccgagctcactggccttgtctacgatgcgtttgagctggttcagagtaaagtatttgcgtccagcatcgattgagattaccttgtttttggcaagtttttcaacctcacgtttagcttcttcttctttttgagcttcaggcgtgagggtcaagttgttgacagtttcttgaagtttagcaatggcttgatcaatcgtatcttgttgggcacggctaaggttgctatcgagagagcgaatagctttttcagcttcttttacggccgtgacgctttctgcagtataacggttcaggtcttttggtacctcgttaagtgcttgctctgcagattcataatcagctgcgaagtattcagcgttggcatttgcaaaatgacgcatgagtttgaagaggcgtgatggtgaataacgtgcagatggagtgtcagcccaagcagctaccataccaccgatgattgggatatcagctccttctgtttttggtacagaagtgattggtgtgtttttaataccattgagcccctgatcgagattgtaccagccttggccatcagcgtttcgtccaagaacgtagtaccaagcatcattggtattaaggatttggtgacctttttcagctagtagtttagaagaagcgacatcgtagcctccccaaccaccagtccacatagaaacgatgatgtctttgtcaaaactaccaaagcttgtgtcgctattgtagtagataccgtcgttaaaagccattggtttgagaccgtgcgattttacaatacgagcgaggtcattggcgtaggcaataaatttttcatagccttttacagggtagccttcgtttggatagtatttatcagcttgaagcacactccaacctttagcatctgtcgcatcattggcatattcatcaagtccgatgttgaagatttcagtctttttcgcgaaataagcagcatacttgtcgataagggcttttgtaaaagcgacagcttgttcgttgtcaagatcgacagtacgggctgatttcttcccaaaatagctaaagttagggttttggattcccaattctttcatggcattgagaatcgcatccatgtgtccaggactatttactgtcggaatgagaccgatacctttatctttggcatagttaatcagatctgtcatttgactttctgttaagtgattgccgtttggatcgttgtaataatcatttgtacctttttcaatggcgcgtttgacatcgtcactggcataggtcttgccgttagctgtgatgctcatatcgtccaacatgaaacggagtccatcatttccgactaataggtgtaaatcagtgtagccataatgtttcgctttatcgatgatttccttgagctgttctggtgagaaatatttacgtccagcatcaatagaaacaattttctttttcgctagtttttcatttacagttgcagcacgttcctttcctgcctctgttgccggtttgtcagcctctgctttcgcttcatcttttttagctggtttatccttgtcagtcttgtctgtatttgactctttagaatcaacctctttcgcttcttcctttttagggctagcttcttctgcctttttattagcagtttctttttcagcagaagttggagttaccacttctgctttatcactaggagttgaactaacttcctcttgtggtttttcttctgtttttggaagactagctaccttatcagtagctggagtttctgtttctacagtttttggagcttctggttgaagcactgctttaggtgtttcctcagtccgattttcggatgattgaggggaatcagaaaccgtatggatggtcggttggttttctgtagtagtaggagtaactccatcggctgcaacagtctgtgcttggaaggcaaatccaattagaacagaagctgctcctacagcgtatttacgaatagaaaaacgctgttgtttttcatgtttcat
>vaccine3~~~bgaA~~~18~~~[Streptococcus_pneumoniae TIGR4_sp0648]
atggggaaaggccattggaatcggaaaagagtttatagcattcgtaagtttgctgtgggagcttgctcagtaatgattgggacttgtgcagttttattaggaggaaatatagctggagaatctgtagtttatgcggatgaaacacttattactcatactgctgagaaacctaaagaggaaaaaatgatagtagaagaaaaggctgataaagctttggaaactaaaaatatagttgaaaggacagaacaaagtgaacctagttcaactgaggctattgcatctgagaagaaagaagatgaagccgtaactccaaaagaggaaaaagtgtctgctaaaccggaagaaaaagctccaaggatagaatcacaagcttcaaatcaagaaaaaccgctcaaggaagatgctaaagctgtaacaaatgaagaagtgaatcaaatgattgaagacaggaaagtggattttaatcaaaattggtactttaaactcaatgcaaattctaaggaagccattaaacctgatgcagacgtatctacgtggaaaaaattagatttaccgtatgactggagtatctttaacgatttcgatcatgaatctcctgcacaaaatgaaggtggacagctcaacggtggggaagcttggtatcgcaagactttcaaactagatgaaaaagacctcaagaaaaatgttcgccttacttttgatggcgtctacatggattctcaagtttatgtcaatggtcagttagtggggcattatccaaatggttataaccagttctcatatgatatcaccaaataccttcaaaaagatggtcgtgagaatgtgattgctgtccatgcagtcaacaaacagccaagtagccgttggtattcaggaagtggtatctatcgtgatgtgactttacaagtgacagataaggtgcatgttgagaaaaatgggacaactattttaacaccaaaacttgaagaacaacaacatggcaaggttgaaactcatgtgaccagcaaaatcgtcaatacggacgacaaagaccatgaacttgtagccgaatatcaaatcgttgaacgaggtggtcatgctgtaacaggcttagttcgtacagcgagtcgtaccttaaaagcacatgaatcaacaagcctagatgcgattttagaagttgaaagaccaaaactctggactgttttaaatgacaaacctgccttgtacgaattgattacgcgtgtttaccgtgacggtcaattggttgatgctaagaaggatttgtttggttaccgttactatcactggactccaaatgaaggtttctctttgaatggtgaacgtattaaattccatggagtatccttgcaccacgaccatggggcgcttggagcagaagaaaactataaagcagaatatcgccgtctcaaacaaatgaaggagatgggagttaactccatccgtacaacccacaaccctgctagtgagcaaaccttgcaaatcgcagcagaactaggtttactcgttcaggaagaggcctttgatacgtggtatggtggcaagaaaccttatgactatggacgtttctttgaaaaagatgccactcacccagaagctcgaaaaggtgaaaaatggtctgattttgacctacgtaccatggtcgaaagaggcaaaaacaaccctgctatcttcatgtggtcaattggtaatgaaataggtgaagctaatggtgatgcccactctttagcaactgttaaacgtttggttaaggttatcaaggatgttgataagactcgctatgttaccatgggagcagataaattccgtttcggtaatggtagcggagggcatgagaaaattgctgatgaactcgatgctgttggatttaactattctgaagataattacaaagcccttagagctaagcatccaaaatggttgatttatggatcagaaacatcttcagctacccgtacacgtggaagttactatcgccctgaacgtgaattgaaacatagcaatggacctgagcgtaattatgaacagtcagattatggaaatgatcgtgtgggttgggggaaaacagcaaccgcttcatggacttttgaccgtgacaacgctggctatgctggacagtttatctggacaggtacggactatattggtgaacctacaccatggcacaaccaaaatcaaactcctgttaagagctcttactttggtatcgtagatacagccggcattccaaaacatgacttctatctctaccaaagccaatgggtttctgttaagaagaaaccgatggtacaccttcttcctcactggaactgggaaaacaaagaattagcatccaaagtagctgactcagaaggtaagattccagttcgtgcttattcgaatgcttctagtgtagaattgttcttgaatggaaaatctcttggtcttaagactttcaataaaaaacaaaccagcgatgggcggacttaccaagaaggtgcaaatgctaatgaactttatcttgaatggaaagttgcctatcaaccaggtaccttggaagcaattgctcgtgatgaatctggcaaggaaattgctcgagataagattacgactgctggtaagccagcggcagttcgtcttattaaggaagaccatgcgattgcagcagatggaaaagacttgacttacatctactatgaaattgttgacagccaggggaatgtggttccaactgctaataatctggttcgcttccaattgcatggccaaggtcaactggtcggtgtagataacggagaacaagccagccgtgaacgctataaggcgcaagcagatggttcttggattcgtaaagcatttaatggtaaaggtgttgccattgtcaaatcaactgaacaagcagggaaattcaccctgactgcccactctgatctcttgaaatcgaaccaagtcactgtctttactggtaagaaagaaggacaagagaagactgttttggggacagaagtgccaaaagtacagaccattattggagaggcacctgaaatgcctaccactgttccgtttgtatacagtgatggtagccgtgcagaacgtcctgtaacctggtcttcagtagatgtgagcaagcctggtattgtaacggtgaaaggtatggctgacggacgagaagtagaagctcgtgtagaagtgattgctcttaaatcagagctaccagttgtgaaacgtattgctccaaatactgacttgaattctgtagacaaatctgtttcctatgttttgattgatggaagtgttgaagagtatgaagtggacaagtgggagattgccgaagaagataaagctaagttagcaattccaggttctcgtattcaagcgaccggttatttagaaggtcaaccaattcatgcaacccttgtggtagaagaaggcaatcctgcggcacctgcagtaccaactgtaacggttggtggtgaggcagtaacaggtcttactagtcaaaaaccaatgcaataccgcactcttgcttatggagctaagttgccagaagtcacagcaagtgctaaaaatgcagctgttacagttcttcaagcaagcgcagcaaacggcatgcgtgcgagcatctttattcagcctaaagatggtggccctcttcaaacctatgcaattcaattccttgaagaagcgccaaaaattgctcacttgagcttgcaagtggaaaaagctgacagtctcaaagaagaccaaactgtcaaattgtcggttcgagctcactatcaagatggaacgcaagctgtattaccagctgataaagtaaccttctctacaagtggtgaaggggaagtcgcaattcgtaaaggaatgcttgagttgcataagccaggagcagtcactctgaacgctgaatatgagggagctaaagaccaagttgaactcactatccaagccaatactgagaagaagattgcgcaatccatccgtcctgtaaatgtagtgacagatttgcatcaggaaccaagtcttccagcaacagtaacagttgagtatgacaaaggtttccctaaaactcataaagtcacttggcaagctattccgaaagaaaaactagactcctatcaaacatttgaagtactaggtaaagttgaaggaattgaccttgaagcgcgtgcaaaagtctctgtagaaggtatcgtttcagttgaagaagtcagtgtgacaactccaatcgcagaagcaccacaattaccagaaagtgttcggacatatgattcaaatggtcacgtttcatcagctaaggttgcatgggatgcgattcgtccagagcaatacgctaaggaaggtgtctttacagttaatggtcgcttagaaggtacgcaattaacaactaaacttcatgttcgcgtatctgctcaaactgagcaaggtgcaaacatttctgaccaatggaccggttcagaattgccacttgcctttgcttcagactcaaatccaagcgacccagtttcaaatgttaatgacaagctcatttcctacaataaccaaccagccaatcgttggacaaactggaatcgtactaatccagaagcttcagtcggtgttctgtttggagattcaggtatcttgagcaaacgctccgttgataatctaagtgtcggattccatgaagaccatggagttggtgtaccgaagtcttatgtgattgagtattatgttggtaagactgtcccaacagctcctaaaaaccctagttttgttggtaatgaggaccatgtctttaatgattctgccaactggaaaccagttactaatctaaaagcccctgctcaactcaaggctggagaaatgaaccactttagctttgataaagttgaaacctatgctgttcgtattcgcatggttaaagcagataacaagcgtggaacgtctatcacagaggtacaaatctttgcgaaacaagttgcggcagccaagcaaggacaaacaagaatccaagttgacggcaaagacttagcaaacttcaaccctgatttgacagactactaccttgagtctgtagatggaaaagttccggcagtcacagcaagtgttagcaacaatggtctcgctaccgtcgttccaagcgttcgtgaaggtgagccagttcgtgtcatcgcgaaagctgaaaatggcgacatcttaggagaataccgtctgcacttcactaaggataagagcttactttctcataaaccagttgctgcggttaaacaagctcgcttgctacaagtaggtcaagcacttgaattgccgactaaggttccagtttacttcacaggtaaagacggctacgaaacaaaagacctgacagttgaatgggaagaagttccagcggaaaatctgacaaaagcaggtcaatttactgttcgaggccgtgtccttggtagtaaccttgttgctgagatcactgtacgagtgacagacaaacttggtgagactctttcagataaccctaactatgatgaaaacagtaaccaggcctttgcttcagcaaccaatgatattgacaaaaactctcatgaccgcgttgactatctcaatgacggagatcattcagaaaatcgtcgttggacaaactggtcaccaacaccatcttctaatccagaagtatcagcgggtgtgattttccgtgaaaatggtaagattgtagaacggactgttacacaaggaaaagttcagttctttgcagatagtggtacggatgcaccatctaaactcgttttagaacgctatgtcggtccagagtttgaagtgccaacctactattcaaactaccaagcctacgacgcagaccatccattcaacaatccagaaaattgggaagctgttccttatcgtgcggataaagacattgcagctggtgatgaaatcaacgtaacatttaaagctatcaaagccaaagctatgagatggcgtatggagcgtaaagcagataagagcggtgttgcgatgattgagatgaccttccttgcaccaagtgaattgcctcaagaaagcactcaatcaaagattcttgtagatggaaaagaacttgctgatttcgctgaaaatcgtcaagactatcaaattacctataaaggtcaacggccaaaagtctcagttgaagaaaacaatcaagtagcttcaactgtggtagatagtggagaagatagctttccagtacttgttcgcctcgtttcagaaagtggaaaacaagtcaaggaataccgtatccacttgactaaggaaaaaccagtttctgagaagacagttgctgctgtacaagaagatcttccaaaaatcgaatttgttgaaaaagatttggcatacaagacagttgagaaaaaagattcaacactgtatctaggtgaaactcgtgtagaacaagaaggaaaagttggaaaagaacgtatctttacagcgattaatcctgatggaagtaaggaagaaaaactccgtgaagtggtagaagttccgacagaccgcatcgtcttggttggaaccaaaccagtagctcaagaagctaaaaaaccacaagtgtcagaaaaagcagatacaaaaccaattgattcaagtgaagctagtcaaactaataaagcccagttaccaagtacaggtagtgcggcaagccaagcagcagtagcagcaggtttaactcttctaggtttgagtgcaggattagtagttactaaaggtaaaaaagaagactag
>vaccine3~~~pppA~~~19~~~[Streptococcus_pneumoniae TIGR4_sp1572]
ttacaaaccaggtgcttgtccaagttcggctgcaagcatccaaattgttttatctgtttcagttttagcgcctgcaaagataccgtttgtcacatcgtcaccttcttcatcagtgacatccaaacctttttggaaaagttctgacaagtaacggtagataacaagaacacgttccaagctttcttcaacattacggtattcaccagcttcttcttcgatttcactattttgaaggaactctgtcaatgtagagaatgggcttccaccgagtgtaatcaagcgttcactgatttcatccaattgaccgtcaagagcttccatgtactcatccatttttggatgccatacaaggaaaccacgaccatgcatataccagtgcacttggtgcaaagcaacgtgagctacatacaaatcagcaacagcttggttcaagacttcctttgtttttgccaatgctactggcgctgcttttgtcaatgatgttacgtcttttactgcttcttttttcaattctaccat
>vaccine3~~~phtA_R6~~~20~~~[Streptococcus_pneumoniae R6_spr1060]
ttgcaactagaaatatcaaatagaaagagagtttcgatgaaaattaataagaaataccttgttggttctgcggcagctttgattttaagtgtttgttcttacgagttgggactgtatcaagctagaacggttaaggaaaataatcgtgtttcctatatagatggaaaacaagcgacgcaaaaaacggagaatttgactcctgatgaggttagcaagcgtgaaggaatcaatgctgagcaaatcgtcatcaagataacagaccaaggctatgtcacttcacatggcgaccactatcattattacaatggtaaggttccttatgatgcgattttcagtgaagaattactcatgaaagatccaaactataagctaaaagatgaggatattgttaatgaggtcaagggtggatatgttatcaaggtagatggaaaatactatgtttaccttaaggatgctgcccacgcggataacgtccgtacaaaagaggaaatcaatcgacaaaaacaagaacatagtcaacatcgtgaaggtgggactccaagaaacgatggtgctgttgccttggcacgttcgcaaggacgctatactacagatgatggttatatctttaatgcttctgatatcatagaggatactggtgatgcttatatcgttcctcatggagatcattaccattacattcctaagaatgagttatcagctagcgagttggctgctgcagaagccttcctatctggtcggggaaatctgtcaaattcaagaacctatcgccgacaaaatagcgataacacttcaagaacaaactgggtaccttctgtaagcaatccaggaactacaaatactaacacaagcaacaacagcaacactaacagtcaagcaagtcaaagtaatgacattgatagtctcttgaaacagctctacaaactgcctttgagtcaacgacatgtagaatctgatggccttgttttcgacccagcgcaaatcacaagtcgaacagctagaggtgttgcagtgccacacggagatcattaccacttcatcccttactctcaaatgtctgaattggaagaacgaatcgctcgtattattccccttcgttatcgttcaaaccattgggtaccagattcaaggccagaacaaccaagtccacaaccgactccggaacctagtccaggcccgcaacctgcaccaaatcttaaaatagactcaaattcttctttggttagtcagctggtacgaaaagttggggaaggatatgtattcgaagaaaagggcatctctcgttatgtctttgcgaaagatttaccatctgaaactgttaaaaatcttgaaagtaagttatcaaaacaagagagtgtttcacacactttaactgctaaaaaagaaaatgttgctcctcgtgaccaagaattttatgataaagcatataatctgttaactgaggctcataaagccttgtttgaaaataagggtcgtaattctgatttccaagccttagacaaattattagaacgcttgaatgatgaatcgactaataaagaaaaattggtagatgatttattggcattcctagcaccaattacccatccagagcgacttggcaagccaaattctcaaattgagtatactgaagacgaagttcgtattgctcaattagctgataagtatacaacgtcagatggttacatttttgatgaacatgatataatcagtgatgaaggagatgcatatgtaacgcctcatatgggccatagtcactggattggaaaagacagcctttctgataaggaaaaagttgcagctcaagcctatactaaagaaaaaggtatcctacctccatctccagacgcagatgttaaagcaaatccaactggagatagtgcagcagctatttacaatcgtgtgaaaggggaaaaacgaattccactcgttcgacttccatatatggttgagcatacagttgaggttaaaaacggtaatttgattattcctcataaggatcattaccataatattaaatttgcttggtttgatgatcacacatacaaagctccaaatggctataccttggaagatttgtttgcgacgattaagtactacgtagaacaccctgacgaacgtccacattctaatgatggatggggcaatgccagtgagcatgtgttaggcaagaaagaccacagtgaagatccaaataagaacttcaaagcggatgaagagccagtagaggaaacacctgctgagccagaagtccctcaagtagagactgaaaaagtagaagcccaactcaaagaagcagaagttttgcttgcgaaagtaacggattctagtctgaaagccaatgcaacagaaactctagctggtttacgaaataatttgactcttcaaattatggataacaatagtatcatggcagaagcagaaaaattacttgcgttgttaaaaggaagtaatccttcatctgtaagtaaggaaaaaataaactaa
>vaccine3~~~phtA_D39~~~21~~~[Streptococcus_pneumoniae D39]
atgaaaattaataagaaataccttgttggttctgcggcagctttgattttaagtgtttgttcttacgagttgggactgtatcaagctagaacggttaaggaaaataatcgtgtttcctatatagatggaaaacaagcgacgcaaaaaacggagaatttgactcctgatgaggttagcaagcgtgaaggaatcaatgctgagcaaatcgtcatcaagataacagaccaaggctatgtcacttcacatggcgaccactatcattattacaatggtaaggttccttatgatgcgattttcagtgaagaattactcatgaaagatccaaactataagctaaaagatgaggatattgttaatgaggtcaagggtggatatgttatcaaggtagatggaaaatactatgtttaccttaaggatgctgcccacgcggataacgtccgtacaaaagaggaaatcaatcgacaaaaacaagaacatagtcaacatcgtgaaggtgggactccaagaaacgatggtgctgttgccttggcacgttcgcaaggacgctatactacagatgatggttatatctttaatgcttctgatatcatagaggatactggtgatgcttatatcgttcctcatggagatcattaccattacattcctaagaatgagttatcagctagcgagttggctgctgcagaagccttcctatctggtcggggaaatctgtcaaattcaagaacctatcgccgacaaaatagcgataacacttcaagaacaaactgggtaccttctgtaagcaatccaggaactacaaatactaacacaagcaacaacagcaacactaacagtcaagcaagtcaaagtaatgacattgatagtctcttgaaacagctctacaaactgcctttgagtcaacgacatgtagaatctgatggccttgttttcgacccagcgcaaatcacaagtcgaacagctagaggtgttgcagtgccacacggagatcattaccacttcatcccttactctcaaatgtctgaattggaagaacgaatcgctcgtattattccccttcgttatcgttcaaaccattgggtaccagattcaaggccagaacaaccaagtccacaaccgactccggaacctagtccaggcccgcaacctgcaccaaatcttaaaatagactcaaattcttctttggttagtcagctggtacgaaaagttggggaaggatatgtattcgaagaaaagggcatctctcgttatgtctttgcgaaagatttaccatctgaaactgttaaaaatcttgaaagtaagttatcaaaacaagagagtgtttcacacactttaactgctaaaaaagaaaatgttgctcctcgtgaccaagaattttatgataaagcatataatctgttaactgaggctcataaagccttgtttgaaaataagggtcgtaattctgatttccaagccttagacaaattattagaacgcttgaatgatgaatcgactaataaagaaaaattggtagatgatttattggcattcctagcaccaattacccatccagagcgacttggcaagccaaattctcaaattgagtatactgaagacgaagttcgtattgctcaattagctgataagtatacaacgtcagatggttacatttttgatgaacatgatataatcagtgatgaaggagatgcatatgtaacgcctcatatgggccatagtcactggattggaaaagacagcctttctgataaggaaaaagttgcagctcaagcctatactaaagaaaaaggtatcctacctccatctccagacgcagatgttaaagcaaatccaactggagatagtgcagcagctatttacaatcgtgtgaaaggggaaaaacgaattccactcgttcgacttccatatatggttgagcatacagttgaggttaaaaacggtaatttgattattcctcataaggatcattaccataatattaaatttgcttggtttgatgatcacacatacaaagctccaaatggctataccttggaagatttgtttgcgacgattaagtactacgtagaacaccctgacgaacgtccacattctaatgatggatggggcaatgccagtgagcatgtgttaggcaagaaagaccacagtgaagatccaaataagaacttcaaagcggatgaagagccagtagaggaaacacctgctgagccagaagtccctcaagtagagactgaaaaagtagaagcccaactcaaagaagcagaagttttgcttgcgaaagtaacggattctagtctgaaagccaatgcaacagaaactctagctggtttacgaaataatttgactcttcaaattatggataacaatagtatcatggcagaagcagaaaaattacttgcgttgttaaaaggaagtaatccttcatctgtaagtaaggaaaaaataaactaa
>vaccine3~~~phtA_CGSP14~~~22~~~[Streptococcus_pneumoniae CGSP14_SPCG_1122]
ttgcaactagaaatatcaaatagaaagagagtttcgatgaaaattaataagaaataccttgttggttctgcggcagctttgattttaagtgtttgttcttacgagttgggactgtatcaagctagaacggttaaggaaaataatcgtgtttcctatatagatggaaaacaagcgacgcaaaaaacggagaatttgactcctgatgaggttagcaagcgtgaaggaatcaatgccgaacaaatcgtcatcaaaataacagaccaaggctatgtcacttcacatggggaccactatcattattacaatggtaaggttccttatgacgctatcatcagtgaagaattgctgatgaaggatccaaactaccagctaaaggacgaggatattatcagtgaaatcaagggtggttatgtgattaaggtagatggaaaatactatgtttaccttaaggatgcagctcatgcggataatgtccgtacaaaagaagaaatcaatcggcaaaaacaagaacatagtcagcatcgtgaaggagggacttcaagaaacgatggtgcggtagcctttgcacgttcacagggacgctacaccacagatgatggttatatctttaatgcttctgatatcattgaagatactggtgatgcttatatcgttcctcacggcgaccattaccattacattcctaagaatgagttatcagctagcgagttagctgctgcaaaagccttcctatctggtcggggaaatctgtcaaattcaagaacctatcgccgacaaaatagcgataacacttcaagaacaaactgggtaccttctgtaagcaattcaggaactacaaatactaacacaagcaacaacagcaacactaacagtcaagcaagtcaaagtaatgacattgatagtctcttgaaacagctctacaaactgcctttgagtcaacgccatgtagaatctgatggccttattttcgacccagcgcaaatcacaagtcgaaccgccagaggtgtagctgtccctcatggtaaccattaccactttatcccttatgaacaaatgtctgaattggaagaacgaattgctcgtattattccccttcgttatcgttcaaaccattgggtaccagattcaagaccagaagaaccaagtccacaacctagtccaagtccgcaacctgcaccaaatcctcaaccagctccaagcaatccaattgatgagaaattggtcaaagaagctgttcgaaaagtaggcgatggttatgtctttgagaagaatggagtttctcgttatatcccagccaagaatctttcagcagaaacagcagcaggcattgatagcaaactggccaagcaggaaagtttatctcataagctaggaactaagaaaactgacctcccatctagtgatcgagaattttacaataagacttatgacttactagcaagaattcaccaagatttacttgataataaaggtcgacaagttgattttgaggctttggataacctgttggaacgactcaaggatgtctcaagtgataaagtcaagttagtggaagatattcttgccttcttagctccgattcgtcatccagaacgtttaggaaaaccaaatgcgcaaattacctacactgatgatgagattcaagtagccaagttggcaggcaagtacacaacagaagacggttatatctttgatcctcgtgatataaccagtgatgagggggatgcctatgtaactccacatatgacccatagccactggattaaaaaagatagtttgtctgaagctgagagagcggcagcccaggcttatgctaaagagaaaggtttgacccctccttcgacagaccatcaggattcaggaaatactgaggcaaaaggagcagaagctatctacaaccgcgtgaaagcagctaagaaggtgccacttgatcgtatgccttacaatcttcaatatactgtagaagtcaaaaacggtagtttaatcatacctcattatgaccattaccataacatcaaatttgagtggtttgacgaaggcctttatgaggcacctaaggggtatactcttgaggatcttttggcgactgtcaagtactatgtcgaacatccaaacgaacgtccgcattcagataatggttttggtaacgctagcgaccatgttcaaagaaacaaaaatggtcaagctgataccaatcaaacggaaaaaccaaacgaggagaaacctcagacagaaaaacctgaggaagaaacccctcgagaagagaaaccgcaaagcgagaaaccagagtctccaaaaccaacagaggaaccagaagaagaatcaccagaagaatcaccagaggaatcagaagaacctcaggtcgagactgaaaaggttaaagaaaaactgagagaggctgaagatttacttggaaaaatccaggatccaattatcaagtccaatgccaaagagactctcacaggattaaaaaataatttactatttggcacccaggacaacaatactattatggcagaagctgaaaaactattggctttattaaaggagaataagtaa
>vaccine3~~~phtA_TIGR4~~~23~~~[Streptococcus_pneumoniae TIGR4_SP_1175]
atgaaagatccaaactataagctaaaagatgaggatattgttaatgaggtcaagggtggatatgttatcaaggtagatggaaaatactatgtttaccttaaggatgctgcccacgcggataacgtccgtacaaaagaggaaatcaatcgacaaaaacaagagcatagtcaacatcgtgaaggtggaactccaagaaacgatggtgctgttgccttggcacgttcgcaaggacgctatactacagatgatggttatatctttaatgcttctgatatcatagaggatactggtgatgcttatatcgttcctcatggagatcattaccattacattcctaagaatgagttatcagctagcgagttggctgctgcagaagccttcctatctggtcgaggaaatctgtcaaattcaagaacctatcgccgacaaaatagcgataacacttcaagaacaaactgggtaccttctgtaagcaatccaggaactacaaatactaacacaagcaacaacagcaacactaacagtcaagcaagtcaaagtaatgacattgatagtctcttgaaacagctctacaaactgcctttgagtcaacgacatgtagaatctgatggccttgtctttgatccagcacaaatcacaagtcgaacagctagaggtgttgcagtgccacacggagatcattaccacttcatcccttactctcaaatgtctgaattggaagaacgaatcgctcgtattattccccttcgttatcgttcaaaccattgggtaccagattcaaggccagaacaaccaagtccacaaccgactccggaacctagtccaggcccgcaacctgcaccaaatcttaaaatagactcaaattcttctttggttagtcagctggtacgaaaagttggggaaggatatgtattcgaagaaaagggcatctctcgttatgtctttgcgaaagatttaccatctgaaactgttaaaaatcttgaaagcaagttatcaaaacaagagagtgtttcacacactttaactgctaaaaaagaaaatgttgctcctcgtgaccaagaattttatgataaagcatataatctgttaactgaggctcataaagccttgtttgaaaataagggtcgtaattctgatttccaagccttagacaaattattagaacgcttgaatgatgaatcgactaataaagaaaaattggtagatgatttattggcattcctagcaccaattacccatccagagcgacttggcaaaccaaattctcaaattgagtatactgaagacgaagttcgtattgctcaattagctgataagtatacaacgtcagatggttacatttttgatgaacatgatataatcagtgatgaaggagatgcatatgtaacgcctcatatgggccatagtcactggattggaaaagatagcctttctgataaggaaaaagttgcagctcaagcctatactaaagaaaaaggtatcctacctccatctccagacgcagatgttaaagcaaatccaactggagatagtgcagcagctatttacaatcgtgtgaaaggggaaaaacgaattccactcgttcgacttccatatatggttgagcatacagttgaggttaaaaacggtaatttgattattcctcataaggatcattaccataatattaaatttgcttggtttgatgatcacacatacaaagctccaaatggctataccttggaagatttgtttgcgacgattaagtactacgtagaacaccctgacgaacgtccacattctaatgatggatggggcaatgccagtgagcatgtgttaggcaagaaagaccacagtgaagatccaaataagaacttcaaagcggatgaagagccagtagaggaaacacctgctgagccagaagtccctcaagtagagactgaaaaagtagaagcccaactcaaagaagcagaagttttgcttgcgaaagtaacggattctagtctgaaagccaatgcaacagaaactctagctggtttacgaaataatttgactcttcaaattatggataacaatagtatcatggcagaagcagaaaaattacttgcgttgttaaaaggaagtaatccttcatctgtaagtaaggaaaaaataaactaa
>vaccine3~~~phtB_CGSP14~~~24~~~[Streptococcus_pneumoniae CGSP14_SPCG_0977]
atgaaaatcaataaaaaatatctagcaggttcagtggcagtccttgccctaagtgtttgttcctatgaacttggtcgtcaccaagctggtcaggttaagaaagagtctaatcgagtttcttatatagatggtgatcaggctggtcaaaaggcagaaaacttgacaccagatgaagtcagtaagagggaggggatcaacgccgaacaaatcgtcatcaagattacggatcaaggttatgtgacctctcatggagaccattatcattactataatggcaaggtcccttatgatgccatcatcagtgaagagctcctcatgaaagatccgaattatcagttgaaggattcagacattgtcaatgaaatcaagggtggctatgtgattaaggtagacggaaaatactatgtttaccttaaagatgcggcccatgcggacaatattcggacaaaagaagagattaaacgtcagaagcaggaacacagtcataatcataactcaagagcagataatgctgttgctgcagccagagcccaaggacgttatacaacggatgatgggtatatcttcaatgcatctgatatcattgaggacacgggtgatgcttatatcgttcctcacggcgaccattaccattacattcctaagaatgagttatcagctagcgagttagctgctgcagaagcctattggaatgggaagcagggatctcgtccttcttcaagttctagttataatgcaaatccagttcaaccaagattgtcagagaaccacaatctgactgtcactccaacttatcatcaaaatcaaggggaaaacatttcaagccttttacgtgaattgtatgctaaacccttatcagaacgccatgtagaatctgatggccttattttcgacccagcgcaaatcacaagtcgaaccgccagaggtgtagctgtccctcatggtaaccattaccactttatcccttatgaacaaatgtctgaattggaagaacgaattgctcgtattattccccttcgttatcgttcaaaccattgggtaccagattcaagaccagaagaaccaagtccacaacctagtccaagtccgcaacctgcaccaaatcctcaaccagctccaagcaatccaattgatgagaaattggtcaaagaagctgttcgaaaagtaggcgatggttatgtctttgaggagaatggagtttctcgttatatcccagccaaggatctttcagcagaaacagcagcaggcattgatagcaaactggccaagcaggaaagtttatctcataagctaggagctaagaaaactgacctcccatctagtgatcgagaattttacaataaggcttatgacttactagcaagaattcaccaagatttacttgataataaaggtcgacaagttgattttgaggctttggataacctgttggaacgactcaaggatgtctcaagtgataaagtcaagttagtggaagatattcttgccttcttagctccgattcgtcatccagaacgtttaggaaaaccaaatgcgcaaattacctacactgatgatgagattcaagtagccaagttggcaggcaagtacacaacagaagacggttatatctttgatcctcgtgatataaccagtgatgagggggatgcctatgtaactccacatatgacccatagccactggattaaaaaagatagtttgtctgaagctgagagagcggcagcccaggcttatgctaaagagaaaggtttgacccctccttcgacagaccatcaggattcaggaaatactgaggcaaaaggagcagaagctatctacaaccgcgtgaaagcagctaagaaggtgccacttgatcgtatgccttacaatcttcaatatactgtagaagtcaaaaacggtagtttaatcatacctcattatgaccattaccataacatcaaatttgagtggtttgacgaaggcctttatgaggcacctaaggggtatactcttgaggatcttttggcgactgtcaagtactatgtcgaacatccaaacgaacgtccgcattcagataatggttttggtaacgctagcgaccatgttcgtaaaaataaggcagaccaagacagtaaacctgatgaagataaggaacatgatgaagtaagtgagccaactcaccctgaatctgatgaaaaagagaatcacgctggtttaaatccttcagcagataatctttataaaccaagcactgatacggaagagacagaggaagaagctgaagataccacagatgaggctgaaattcctcaagtagagaattctgttattaacgctaagatagcagatgcggaggccttgctagaaaaagtaacagatcctagtattagacaaaatgctatggagacattgactggtctaaaaagtagtcttcttctcggaacgaaagataataacactatttcagcagaagtagatagtctcttggctttgttaaaaaaaagtcaaccggctccgatacagtag
>vaccine3~~~phtB_Hungary19A_6~~~25~~~[Streptococcus_pneumoniae Hungary19A_6_SPH_1104]
atgaaaatcaataaaaaatatctagcaggttcagtggcagtccttgccctaagtgtttgttcctatgaacttggtcgtcaccaagctggtcaggttaagaaagagtctaatcgagtttcttatatagatggtgatcaggctggtcaaaaggcagaaaatttgacaccagatgaagtcagtaagagagaggggatcaacgccgaacaaatcgtcatcaagattacggatcaaggttatgtgacctctcatggagaccattatcattactataatggcaaggtcccttatgatgccatcatcagtgaagagctcctcatgaaagatccgaattatcagttgaaggattcagacattgtcaatgaaatcaagggtggttatgtcattaaggtaaacggtaaatactatgtttaccttaaggatgcagctcatgcggataatattcggacaaaagaagagattaaacgtcagaagcaggaacacagtcataatcacgggggtggttctaacgatcaagcagtagttgcagccagagcccaaggacgctatacaacggatgatggttatatcttcaatgcatctgatatcatcgaagatacgggcgatgcctatatcgttcctcatggcaatcacttccactatattcctaagagtgatttatctgccagtgaattagctgctgcccaagcctattggaatgggaagcagggatctcgtccttcttcaagttctagtcataatgcaaatccagctcaaccaagattgtcagagaaccacaatctgactgtcactccaacttatcatcaaaatcaaggggaaaacatttcaagccttttacgtgaattgtatgctaaacccttatcagaacgccatgtggaatcggatggccttattttcgacccagcgcaaatcacaagtcgaaccgccagaggtgtagctgtccctcatggtaaccattaccactttatcccttatgaacaaatgtctgaattggaagaacgaattgctcgtattattccccttcgttatcgttcaaaccattgggtaccagattcaagaccagaacaacccagtccacaaccgactccggaacctagtccaagtccgcaacctgcaccaaatcctcaaccagctccaagcaatccaattgatgagaaattggtcaaagaagctgttcgaaaagtaggcgatggttatgtctttgaggagaatggagtttctcgttatatcccagccaaggatctttcagcagaaacagcagcaggcattgatagcaaactggccaagcaggaaagtttatctcataagctaggagctaagaaaactgacctcccatctagtgatagagaattttacaataaggcttatgacttactagcaagaattcaccaagatttacttgataataaaggtcgacaagttgattttgaggctttggataacctgttggaacgactcaaggatgtctcaagtgataaagtcaagttagtggatgatattcttgccttcttagctccgattcgtcatccagaacgtttaggaaaaccaaattcgcaaattacctacactgatgatgagattcaagtagccaagttggcaggcaagtacacaacagaagacggttatatctttgatcctcgtgatataaccagtgatgagggggatgcctatgtaactccacatatgacccatagccactggattaaaaaagatagtttgtctgaagctgagagagcggcagcccaggcttatgctaaagagaaaggtttgacccctccttcgacagaccatcaggattcaggaaatactgaggcaaaaggagcagaagctatctacaaccgcgtgaaagcagctaagaaggtgccacttgatcgtatgccttacaatcttcaatatactgtagaagtcaaaaacggtagtttaatcatacctcattatgaccattaccataacatcaaatttgagtggtttgacgaaggcctttatgaggcacctaaggggtatactcttgaggatcttttggcgactgtcaagtactatgtcgaacatccaaacgaacgtccgcattcagataatggttttggtaacgctagcgaccatgttcaaagaaacaaaaatggtcaagctgataccaatcaaacggagaaacctcagacagaaaaacctgaggaagataaggaacatgatgaagtaagtgagccaactcaccctgaatctgatgaaaaagagaatcacgctggtttaaatccttcagcagataatctttataaaccaagcactgatacggaagagacagaggaagaagctgaagatactacagatgaggctgaaattcctcaagtagagcattctgttattaacgctaagatagcagaggcggaggccttgctagaaaaagtaacagattctagtattagacaaaatgctatggagacattgactggtctaaaaagtagtcttcttctcggaacgaaagataataatactatttcagcagaagtagatagtctcttggctttgttaaaagaaagtcaaccggctcctatacagtag
>vaccine3~~~phtB_TIGR4~~~26~~~[Streptococcus_pneumoniae TIGR4_SP_1174]
atgaaaattaataaaaaatatctagcaggttcagtggcagtccttgccctaagtgtttgttcctatgagcttggacgttaccaagctggtcaggataagaaagagtctaatcgagttgcttatatagatggtgatcaggctggtcaaaaggcagaaaacttgacaccagatgaagtcagtaagagggaggggatcaacgccgaacaaattgttatcaagattacggatcaaggttatgtgacctctcatggagaccattatcattactataatggcaaggttccttatgatgccatcatcagtgaagagctcctcatgaaagatccgaattatcagttgaaggattcagacattgtcaatgaaatcaagggtggttatgtcattaaggtaaacggtaaatactatgtttaccttaaggatgcagctcatgcggataatattcggacaaaagaagagattaaacgtcagaagcaggaacgcagtcataatcataactcaagagcagataatgctgttgctgcagccagagcccaaggacgttatacaacggatgatgggtatatcttcaatgcatctgatatcattgaggacacgggtgatgcttatatcgttcctcacggcgaccattaccattacattcctaagaatgagttatcagctagcgagttagctgctgcagaagcctattggaatgggaagcagggatctcgtccttcttcaagttctagttataatgcaaatccagctcaaccaagattgtcagagaaccacaatctgactgtcactccaacttatcatcaaaatcaaggggaaaacatttcaagccttttacgtgaattgtatgctaaacccttatcagaacgccatgtggaatctgatggccttattttcgacccagcgcaaatcacaagtcgaaccgccagaggtgtagctgtccctcatggtaaccattaccactttatcccttatgaacaaatgtctgaattggaaaaacgaattgctcgtattattccccttcgttatcgttcaaaccattgggtaccagattcaagaccagaagaaccaagtccacaaccgactccagaacctagtccaagtccgcaaccagctccaagcaatccaattgatgagaaattggtcaaagaagctgttcgaaaagtaggcgatggttatgtctttgaggagaatggagtttctcgttatatcccagccaaggatctttcagcagaaacagcagcaggcattgatagcaaactggccaagcaggaaagtttatctcataagctaggaactaagaaaactgacctcccatctagtgatcgagaattttacaataaggcttatgacttactagcaagaattcaccaagatttacttgataataaaggtcgacaagttgattttgaggctttggataacctgttggaacgactcaaggatgtctcaagtgataaagtcaagttagtggaagatattcttgccttcttagctccgattcgtcatccagaacgtttaggaaaaccaaatgcgcaaattacctacactgatgatgagattcaagtagccaagttggcaggcaagtacacaacagaagacggttatatctttgatcctcgtgatataaccagtgatgagggggatgcctatgtaactccacatatgacccatagccactggattaaaaaagatagtttgtctgaagctgagagagcggcagcccaggcttatgctaaagagaaaggtttgacccctccttcgacagaccatcaggattcaggaaatactgaggcaaaaggagcagaagctatctacaaccgcgtgaaagcagctaagaaggtgccacttgatcgtatgccttacaatcttcaatatactgtagaagtcaaaaacggtagtttaatcatacctcattatgaccattaccataacatcaaatttgagtggtttgacgaaggcctttatgaggcacctaaggggtatactcttgaggatcttttggcgactgtcaagtactatgtcgaacatccaaacgaacgtccgcattcagataatggttttggtaacgctagcgaccatgttcaaagaaacaaaaatggtcaagctgataccaatcaaacggaaaaaccaagcgaggagaaacctcagacagaaaaacctgaggaagaaacccctcgagaagagaaaccgcaaagcgagaaaccagagtctccaaaaccaacagaggaaccagaagaatcaccagaggaatcagaagaacctcaggtcgagactgaaaaggttgaagaaaaactgagagaggctgaagatttacttggaaaaatccaggatccaattatcaagtccaatgccaaagagactctcacaggattaaaaaataatttactatttggcacccaggacaacaatactattatggcagaagctgaaaaactattggctttattaaaggagagtaagtaa
>vaccine3~~~phtD_R6~~~27~~~[Streptococcus_pneumoniae R6_SPR_0907]
atgaaaatcaataaaaaatatctagcaggttcagtggcagtccttgccctaagtgtttgttcctatgaacttggtcgtcaccaagctggtcaggttaagaaagagtctaatcgagtttcttatatagatggtgatcaggctggtcaaaaggcagaaaatttgacaccagatgaagtcagtaagagagaggggatcaacgccgaacaaattgttatcaagattacggatcaaggttatgtgacctctcatggagaccattatcattactataatggcaaggttccttatgatgccatcatcagtgaagaacttctcatgaaagatccgaattatcagttgaaggattcagacattgtcaatgaaatcaagggtggctatgtgattaaggtagacggaaaatactatgtttaccttaaagatgcggcccatgcggacaatattcggacaaaagaagagattaaacgtcagaagcaggaacgcagtcataatcacaactcaagagcagataatgctgttgctgcagccagagcccaaggacgttatacaacggatgatgggtatatcttcaatgcttctgatatcattgaagatactggtgatgcttatatcgttcctcacggcgaccattaccattacattcctaagagtgatttgtctgccagtgaattagctgctgcccaagcctattggaatgggaagcagggatctcgtccttcttcaagttctagtcataatgcaaatccagctcaaccaagattgtcagagaaccacaatctgactgtcactccaacttatcatcaaaatcaaggggaaaacatttcaagccttttacgtgaattgtatgctaaacccttatcagaacgccatgtagaatctgatggccttattttcgacccagcgcaaatcacaagtcgaaccgccaatggtgttgctgtaccgcacggagaccattatcactttattccttattcacaactgtcacctttggaagaaaaattggctcgtattattccccttcgttatcgttcaaaccattgggtaccagattcaagaccagaacaaccaagtccacaatcgactccggaacctagtccaagtccgcaacctgcaccaaatcctcaaccagctccaagcaatccaattgatgagaaattggtcaaagaagctgttcgaaaagtaggcgatggttatgtctttgaggagaatggagttcctcgttatatcccagccaaggatctttcagcagaaacagcagcaggcattgatagcaaactggccaagcaggaaagtttatctcataagctaggagctaagaaaactgacctcccatctagtgatagagaattttacaataaggcttatgacttactagcaagaattcatcaagatttacttgataataaaggtcgacaagttgattttgaggctttggataacctgttggaacgactcaaggatgtctcaagtgataaagtcaagttagtggatgatattcttgccttcttagctccgattcgtcatccagaacgtttaggaaaaccaaatgcgcaaattacctacactgatgatgagattcaagtagccaagttggcaggcaagtacacaacagaagacggttatatctttgatcctcgtgatataaccagtgatgagggggatgcctatgtaactccacatatgacccatagccactggattaaaaaagatagtttgtctgaagctgagagagcggcagcccaggcttatgctaaagagaaaggtttgacccctccttcgacagaccatcaggattcaggaaatactgaggcaaaaggagcagaagctatctacaaccgcgtgaaagcagctaagaaggtgccacttgatcgtatgccttacaatcttcaatatactgtagaagtcaaaaacggtagtttaatcatacctcattatgaccattaccataacatcaaatttgagtggtttgacgaaggcctttatgaggcacctaaggggtatagtcttgaggatcttttggcgactgtcaagtactatgtcgaacatccaaacgaacgtccgcattcagataatggttttggtaacgctagcgaccatgttcaaagaaacaaaaatggtcaagctgataccaatcaaacggaaaaaccaaacgaggagaaacctcagacagaaaaacctgaggaagataaggaacatgatgaagtaagtgagccaactcaccctgaatctgatgaaaaagagaatcacgttggtttaaatccttcagcagataatctttataaaccaagcactgatacggaagagacagaggaagaagctgaagatactacagatgaggctgaaattcctcaagtagagcattctgttattaacgctaagatagcagaggcggaggccttgctagaaaaagtaacagattctagtattagacaaaatgctgtggagacattgactggtctaaaaagtagtcttcttctcggaacgaaagataataacactatttcagcagaagtagatagtctcttggctttgttaaaagaaagtcaaccgactcctatacagtag
>vaccine3~~~phtD_D39~~~28~~~[Streptococcus_pneumoniae D39_SPD_0889]
atgaaaatcaataaaaaatatctagcaggttcagtggcagtccttgccctaagtgtttgttcctatgaacttggtcgtcaccaagctggtcaggttaagaaagagtctaatcgagtttcttatatagatggtgatcaggctggtcaaaaggcagaaaatttgacaccagatgaagtcagtaagagagaggggatcaacgccgaacaaattgttatcaagattacggatcaaggttatgtgacctctcatggagaccattatcattactataatggcaaggttccttatgatgccatcatcagtgaagaacttctcatgaaagatccgaattatcagttgaaggattcagacattgtcaatgaaatcaagggtggctatgtgattaaggtagacggaaaatactatgtttaccttaaagatgcggcccatgcggacaatattcggacaaaagaagagattaaacgtcagaagcaggaacgcagtcataatcacaactcaagagcagataatgctgttgctgcagccagagcccaaggacgttatacaacggatgatgggtatatcttcaatgcttctgatatcattgaagatactggtgatgcttatatcgttcctcacggcgaccattaccattacattcctaagagtgatttgtctgccagtgaattagctgctgcccaagcctattggaatgggaagcagggatctcgtccttcttcaagttctagtcataatgcaaatccagctcaaccaagattgtcagagaaccacaatctgactgtcactccaacttatcatcaaaatcaaggggaaaacatttcaagccttttacgtgaattgtatgctaaacccttatcagaacgccatgtagaatctgatggccttattttcgacccagcgcaaatcacaagtcgaaccgccaatggtgttgctgtaccgcacggagaccattatcactttattccttattcacaactgtcacctttggaagaaaaattggctcgtattattccccttcgttatcgttcaaaccattgggtaccagattcaagaccagaacaaccaagtccacaatcgactccggaacctagtccaagtccgcaacctgcaccaaatcctcaaccagctccaagcaatccaattgatgagaaattggtcaaagaagctgttcgaaaagtaggcgatggttatgtctttgaggagaatggagttcctcgttatatcccagccaaggatctttcagcagaaacagcagcaggcattgatagcaaactggccaagcaggaaagtttatctcataagctaggagctaagaaaactgacctcccatctagtgatagagaattttacaataaggcttatgacttactagcaagaattcatcaagatttacttgataataaaggtcgacaagttgattttgaggctttggataacctgttggaacgactcaaggatgtctcaagtgataaagtcaagttagtggatgatattcttgccttcttagctccgattcgtcatccagaacgtttaggaaaaccaaatgcgcaaattacctacactgatgatgagattcaagtagccaagttggcaggcaagtacacaacagaagacggttatatctttgatcctcgtgatataaccagtgatgagggggatgcctatgtaactccacatatgacccatagccactggattaaaaaagatagtttgtctgaagctgagagagcggcagcccaggcttatgctaaagagaaaggtttgacccctccttcgacagaccatcaggattcaggaaatactgaggcaaaaggagcagaagctatctacaaccgcgtgaaagcagctaagaaggtgccacttgatcgtatgccttacaatcttcaatatactgtagaagtcaaaaacggtagtttaatcatacctcattatgaccattaccataacatcaaatttgagtggtttgacgaaggcctttatgaggcacctaaggggtatagtcttgaggatcttttggcgactgtcaagtactatgtcgaacatccaaacgaacgtccgcattcagataatggttttggtaacgctagcgaccatgttcaaagaaacaaaaatggtcaagctgataccaatcaaacggaaaaaccaaacgaggagaaacctcagacagaaaaacctgaggaagataaggaacatgatgaagtaagtgagccaactcaccctgaatctgatgaaaaagagaatcacgttggtttaaatccttcagcagataatctttataaaccaagcactgatacggaagagacagaggaagaagctgaagatactacagatgaggctgaaattcctcaagtagagcattctgttattaacgctaagatagcagaggcggaggccttgctagaaaaagtaacagattctagtattagacaaaatgctgtggagacattgactggtctaaaaagtagtcttcttctcggaacgaaagataataacactatttcagcagaagtagatagtctcttggctttgttaaaagaaagtcaaccgactcctatacagtag
>vaccine3~~~phtD_TIGR4~~~29~~~[Streptococcus_pneumoniae TIGR4_SP_1003]
atgaaaattaataaaaaatatctagcaggttcagtggcagtccttgccctaagtgtttgttcctatgaacttggtcgtcaccaagctggtcaggttaagaaagagtctaatcgagtttcttatatagatggtgatcaggctggtcaaaaggcagaaaacttgacaccagatgaagtcagtaagagggaggggatcaacgccgaacaaatcgtcatcaagattacggatcaaggttatgtgacctctcatggagaccattatcattactataatggcaaggtcccttatgatgccatcatcagtgaagagctcctcatgaaagatccgaattatcagttgaaggattcagacattgtcaatgaaatcaagggtggttatgttatcaaggtagatggaaaatactatgtttaccttaaggatgcagctcatgcggataatattcggacaaaagaagagattaaacgtcagaagcaggaacacagtcataatcacgggggtggttctaacgatcaagcagtagttgcagccagagcccaaggacgctatacaacggatgatggttatatcttcaatgcatctgatatcattgaggacacgggtgatgcttatatcgttcctcacggcgaccattaccattacattcctaagaatgagttatcagctagcgagttagctgctgcagaagcctattggaatgggaagcagggatctcgtccttcttcaagttctagttataatgcaaatccagctcaaccaagattgtcagagaaccacaatctgactgtcactccaacttatcatcaaaatcaaggggaaaacatttcaagccttttacgtgaattgtatgctaaacccttatcagaacgccatgtggaatctgatggccttattttcgacccagcgcaaatcacaagtcgaaccgccagaggtgtagctgtccctcatggtaaccattaccactttatcccttatgaacaaatgtctgaattggaaaaacgaattgctcgtattattccccttcgttatcgttcaaaccattgggtaccagattcaagaccagaacaaccaagtccacaatcgactccggaacctagtccaagtccgcaacctgcaccaaatcctcaaccagctccaagcaatccaattgatgagaaattggtcaaagaagctgttcgaaaagtaggcgatggttatgtctttgaggagaatggagtttctcgttatatcccagccaaggatctttcagcagaaacagcagcaggcattgatagcaaactggccaagcaggaaagtttatctcataagctaggagctaagaaaactgacctcccatctagtgatcgagaattttacaataaggcttatgacttactagcaagaattcaccaagatttacttgataataaaggtcgacaagttgattttgaggctttggataacctgttggaacgactcaaggatgtcccaagtgataaagtcaagttagtggatgatattcttgccttcttagctccgattcgtcatccagaacgtttaggaaaaccaaatgcgcaaattacctacactgatgatgagattcaagtagccaagttggcaggcaagtacacaacagaagacggttatatctttgatcctcgtgatataaccagtgatgagggggatgcctatgtaactccacatatgacccatagccactggattaaaaaagatagtttgtctgaagctgagagagcggcagcccaggcttatgctaaagagaaaggtttgacccctccttcgacagaccatcaggattcaggaaatactgaggcaaaaggagcagaagctatctacaaccgcgtgaaagcagctaagaaggtgccacttgatcgtatgccttacaatcttcaatatactgtagaagtcaaaaacggtagtttaatcatacctcattatgaccattaccataacatcaaatttgagtggtttgacgaaggcctttatgaggcacctaaggggtatactcttgaggatcttttggcgactgtcaagtactatgtcgaacatccaaacgaacgtccgcattcagataatggttttggtaacgctagcgaccatgttcgtaaaaataaggtagaccaagacagtaaacctgatgaagataaggaacatgatgaagtaagtgagccaactcaccctgaatctgatgaaaaagagaatcacgctggtttaaatccttcagcagataatctttataaaccaagcactgatacggaagagacagaggaagaagctgaagataccacagatgaggctgaaattcctcaagtagagaattctgttattaacgctaagatagcagatgcggaggccttgctagaaaaagtaacagatcctagtattagacaaaatgctatggagacattgactggtctaaaaagtagtcttcttctcggaacgaaagataataacactatttcagcagaagtagatagtctcttggctttgttaaaagaaagtcaaccggctcctatacagtag
>vaccine3~~~phtE_R6~~~30~~~[Streptococcus_pneumoniae R6_SPR_0908]
atgaaattcagtaaaaaatatatagcagctggatcagctgttatcgtatccttgagtctatgtgcctatgcactaaaccagcatcgttcgcaggaaaataaggacaataatcgtgtctcttatgtagatggcagccagtcaagtcagaaaagtgaaaacttgacaccagaccaggttagccagaaagaaggaattcaggccgagcaaattgtaatcaaaattacagatcagggctatgtaacgtcacacggtgaccactatcattactataatgggaaagttccttatgatgccctctttagtgaagaactcttgatgaaggatccaaactatcaacttaaagacgctgatattgtcaatgaagtcaagggtggttatatcatcaaggtcgatggaaaatattatgtctacctgaaagatgcagctcatgctgataatgttcgaactaaagatgaaatcaatcgtcaaaaacaagaacatgtcaaagataatgagaaggttaactctaatgttgctgtagcaaggtctcagggacgatatacgacaaatgatggttatgtctttaatccagctgatattatcgaagatacgggtaatgcttatatcgttcctcatggaggtcactatcactacattcccaaaagcgatttatctgctagtgaattagcagcagctaaagcacatctggctggaaaaaatatgcaaccgagtcagttaagctattcttcaacagctagtgacaataacacgcaatctgtagcaaaaggatcaactagcaagccagcaaataaatctgaaaatctccagagtcttttgaaggaactctatgattcacctagcgcccaacgttacagtgaatcagatggcctggtctttgaccctgctaagattatcagtcgtacaccaaatggagttgcgattccgcatggcgaccattaccactttattccttacagcaagctttctgccttagaagaaaagattgccagaagggtgcctatcagtggaactggttctacagtttctacaaatgcaaaacctaatgaagtagtgtctagtctaggcagtctttcaagcaatccttcttctttaacgacaagtaaggagctctcttcagcatctgatggttatatttttaatccaaaagatatcgttgaagaaacggctacagcttatattgtaagacatggtgatcatttccattacattccaaaatcaaatcaaattgggcaaccgactcttccaaacaatagtctagcaacaccttctccatctcttccaatcaatccaggaatttcacatgagaaacatgaagaagatggatacggatttgatgctaatcgtattatcgctgaagatgaatcaggatttatcatgagtcacggtaatcataatcattacttcttcaagaaggacttgacagaagagcaaattaaagctgcgcaaaaacatttagaggaagttaaaactagtcataatggattagattctttgtcatctcatgaacaggattatccaggtaatgccaaagaaatgaaagatttagataaaaaaatcgaagaaaaaattgctggcattatgaaacaatatggtgtcaaacgtgaaagtattgtcgtgaataaagaaaaaaatgcgattatttatccgcatggagatcatcatcatgcagatccgattgatgaacataaaccggttggaattggtcattctcacagtaactatgaactgtttaaacccgaagaaggagttgctaaaaaagaagggaataaagtttatactggagaagaattaacgaatgttgttaatttgttaaaaaatagtacgtttaataatcaaaactttactctagccaatggtcaaaaacgcgtttcttttagttttccgcctgaattggagaaaaaattaggtatcaatatgctagtaaaattaataacaccagatggaaaagtattggagaaagtatctggtaaagtatttggagaaggagtagggaatattgcaaactttgaattagatcagccttatttaccaggacaaacatttaagtatactatcgcttcaaaagattatccagaagtaagttatgatggtacatttacagttccaacctctttagcttacaaaatggccagtcaaacgattttctatcctttccatgcaggggatacttatttaagagtgaaccctcaatttgcagtgcctaaaggaactgatgctttagtcagagtgtttgatgaatttcatggaaatgcttatttagaaaataactataaagttggtgaaatcaaattaccgattccgaaattaaaccaaggaacaaccagaacggccggaaataaaattcctgtaaccttcatggcaaatgcttatttggacaatcaatcgacttatattgtggaagtacctatcttggaaaaagaaaatcaaactgataaaccaagtattctaccacaatttaaaaggaataaagcacaagaaaactcaaaacttgatgaaaaggtagaagaaccaaagactagtgagaaggtagaaaaagaaaaactttctgaaactgggaatagtactagtaattcaacgttagaagaagttcctacagtggatcctgtacaagaaaaagtagcaaaatttgctgaaagttatgggatgaagctagaaaatgtcttgtttaatatggacggaacaattgaattatatttaccatcgggagaagtcattaaaaagaatatggcagattttacaggagaagcacctcaaggaaatggtgaaaataaaccatctgaaaatggaaaagtatctactggaacagttgagaaccaaccaacagaaaataaaccagcagattctttaccagaggcaccaaacgaaaaacctgtaaaaccagaaaactcaacggataatggaatgttgaatccagaagggaatgtggggagtgaccctatgttagatccagcattagaggaagctccagcagtagatcctgtacaagaaaaattagaaaaatttacagctagttacggattaggcttagatagtgttatattcaatatggatggaacgattgaattaagattgccaagtggagaagtgataaaaaagaatttatctgatctcatagcgtaa
>vaccine3~~~phtE_D39~~~31~~~[Streptococcus_pneumoniae D39_SPD_0890]
atgaaattcagtaaaaaatatatagcagctggatcagctgttatcgtatccttgagtctatgtgcctatgcactaaaccagcatcgttcgcaggaaaataaggacaataatcgtgtctcttatgtagatggcagccagtcaagtcagaaaagtgaaaacttgacaccagaccaggttagccagaaagaaggaattcaggccgagcaaattgtaatcaaaattacagatcagggctatgtaacgtcacacggtgaccactatcattactataatgggaaagttccttatgatgccctctttagtgaagaactcttgatgaaggatccaaactatcaacttaaagacgctgatattgtcaatgaagtcaagggtggttatatcatcaaggtcgatggaaaatattatgtctacctgaaagatgcagctcatgctgataatgttcgaactaaagatgaaatcaatcgtcaaaaacaagaacatgtcaaagataatgagaaggttaactctaatgttgctgtagcaaggtctcagggacgatatacgacaaatgatggttatgtctttaatccagctgatattatcgaagatacgggtaatgcttatatcgttcctcatggaggtcactatcactacattcccaaaagcgatttatctgctagtgaattagcagcagctaaagcacatctggctggaaaaaatatgcaaccgagtcagttaagctattcttcaacagctagtgacaataacacgcaatctgtagcaaaaggatcaactagcaagccagcaaataaatctgaaaatctccagagtcttttgaaggaactctatgattcacctagcgcccaacgttacagtgaatcagatggcctggtctttgaccctgctaagattatcagtcgtacaccaaatggagttgcgattccgcatggcgaccattaccactttattccttacagcaagctttctgccttagaagaaaagattgccagaagggtgcctatcagtggaactggttctacagtttctacaaatgcaaaacctaatgaagtagtgtctagtctaggcagtctttcaagcaatccttcttctttaacgacaagtaaggagctctcttcagcatctgatggttatatttttaatccaaaagatatcgttgaagaaacggctacagcttatattgtaagacatggtgatcatttccattacattccaaaatcaaatcaaattgggcaaccgactcttccaaacaatagtctagcaacaccttctccatctcttccaatcaatccaggaatttcacatgagaaacatgaagaagatggatacggatttgatgctaatcgtattatcgctgaagatgaatcaggatttatcatgagtcacggtaatcataatcattacttcttcaagaaggacttgacagaagagcaaattaaagctgcgcaaaaacatttagaggaagttaaaactagtcataatggattagattctttgtcatctcatgaacaggattatccaggtaatgccaaagaaatgaaagatttagataaaaaaatcgaagaaaaaattgctggcattatgaaacaatatggtgtcaaacgtgaaagtattgtcgtgaataaagaaaaaaatgcgattatttatccgcatggagatcatcatcatgcagatccgattgatgaacataaaccggttggaattggtcattctcacagtaactatgaactgtttaaacccgaagaaggagttgctaaaaaagaagggaataaagtttatactggagaagaattaacgaatgttgttaatttgttaaaaaatagtacgtttaataatcaaaactttactctagccaatggtcaaaaacgcgtttcttttagttttccgcctgaattggagaaaaaattaggtatcaatatgctagtaaaattaataacaccagatggaaaagtattggagaaagtatctggtaaagtatttggagaaggagtagggaatattgcaaactttgaattagatcagccttatttaccaggacaaacatttaagtatactatcgcttcaaaagattatccagaagtaagttatgatggtacatttacagttccaacctctttagcttacaaaatggccagtcaaacgattttctatcctttccatgcaggggatacttatttaagagtgaaccctcaatttgcagtgcctaaaggaactgatgctttagtcagagtgtttgatgaatttcatggaaatgcttatttagaaaataactataaagttggtgaaatcaaattaccgattccgaaattaaaccaaggaacaaccagaacggccggaaataaaattcctgtaaccttcatggcaaatgcttatttggacaatcaatcgacttatattgtggaagtacctatcttggaaaaagaaaatcaaactgataaaccaagtattctaccacaatttaaaaggaataaagcacaagaaaactcaaaacttgatgaaaaggtagaagaaccaaagactagtgagaaggtagaaaaagaaaaactttctgaaactgggaatagtactagtaattcaacgttagaagaagttcctacagtggatcctgtacaagaaaaagtagcaaaatttgctgaaagttatgggatgaagctagaaaatgtcttgtttaatatggacggaacaattgaattatatttaccatcgggagaagtcattaaaaagaatatggcagattttacaggagaagcacctcaaggaaatggtgaaaataaaccatctgaaaatggaaaagtatctactggaacagttgagaaccaaccaacagaaaataaaccagcagattctttaccagaggcaccaaacgaaaaacctgtaaaaccagaaaactcaacggataatggaatgttgaatccagaagggaatgtggggagtgaccctatgttagatccagcattagaggaagctccagcagtagatcctgtacaagaaaaattagaaaaatttacagctagttacggattaggcttagatagtgttatattcaatatggatggaacgattgaattaagattgccaagtggagaagtgataaaaaagaatttatctgatctcatagcgtaa
>vaccine3~~~phtE_CGSP14~~~32~~~[Streptococcus_pneumoniae CGSP14_SPCG_0978]
atgaaatttagtaaaaaatatatagcagctggatcagctgttatcgtatccttgagtctatgtgcctatgcactaaaccagcatcgttcgcaggaaaataaggacaataatcgtgtctcttatgtggatggcagccagtcaagtcagaaaagtgaaaacttgacaccagaccaggttagccagaaagaaggaattcaggctgagcaaattgtaatcaaaattacagatcagggctatgtaacgtcacacggtgaccactatcattactataatgggaaagttccttatgatgccctctttagtgaagaactcttgatgaaggatccaaactatcaacttaaagacgctgatattgtcaatgaagtcaagggtggttatatcatcaaggtcgatggaaaatattatgtctacctgaaagatgcagctcatgctgataatgttcgaactaaagatgaaatcaatcgtcaaaaacaagaacatgtcaaagataatgagaaggttaactctaatgttgctgtagcaaggtctcagggacgatatacgacaaatgatggttatgtctttaatccagctgatattatcgaagatacgggtaatgcttatatcgttcctcatggaggtcactatcactacattcccaaaagcgatttatctgctagtgaattagcagcagctaaagcacatctggctggaaaaaatatgcaaccgagtcagttaagctattcttcaacagctagtgacaataacacgcaatctgtagcaaaaggatcaactagcaagccagcaaataaatctgaaaatctccagagtcttttgaaggaactctatgattcacctagcgcccaacgttacagtgaatcagatggcctggtctttgaccctgctaagattatcagtcgtacaccaaatggagttgcgattccgcatggcgaccattaccactttattccttacagcaagctttctgccttagaagaaaagattgccagaatggtgcctatcagtggaactggttctacagtttctacaaatgcaaaacctaatgaagtagtgtctagtctaggcagtctttcaagcaatccttcttctttaacgacaagtaaggagctctcttcagcatctgatggttatatttttaatccaaaagatatcgttgaagaaacggctacagcttatattgtaagacatggtgatcatttccattacattccaaaatcaaatcaaattgggcaaccgactcttccaaacaatagtctagcaacaccttctccatctcttccaatcaatccaggaacttcacatgagaaacatgaagaagatggatacggatttgatgctaatcgtattatcgctgaagatgaatcaggttttgtcatgagtcacggagaccacaatcattatttcttcaagaaggacttgacagaagagcaaattaaggctgcgcaaaaacatttagaggaagttaaaactagtcataatggattagattctttgtcatctcatgaacaggattatccaggtaatgccaaagaaatgaaagatttagataaaaaaatcgaagaaaaaattgctggcattatgaaacaatatggtgtcaaacgtgaaagtattgtcgtgaataaagaaaaaaatgcgattatttatccgcatggagatcaccatcatgcagatccgattgatgaacataaaccggttggaattggtcattctcacagtaactatgaactgtttaaacccgaagaaggagttgctaaaaaagaagggaataaagtttatactggagaagaattaacgaatgttgttaatttgttaaaaaatagtacgtttaataatcaaaactttactctagccaatggtcaaaaacgcgtttcttttagttttccgcctgaattggagaaaaaattaggtatcaatatgctagtaaaattaataacaccagatggaaaagtattggagaaagtatctggtaaagtatttggagaaggagtagggaatattgcaaactttgaattagatcaaccttatttaccaggacaaacatttaagtatactatcgcttcaaaagattatccagaagtaagttatgatggtacatttacagttccaacctctttagcttacaaaatggccagtcaaacgattttctatcctttccatgcaggggatacttatttaagagtgaaccctcaatttgcagtgcctaaaggaactgatgctttagtcagagtgtttgatgaatttcatggaaatgcttatttagaaaataactataaagttggtgaaatcaaattaccgattccgaaattaaaccaaggaacaaccagaacggccggaaataaaattcctgtaaccttcatggcaaatgcttatttggacaatcaatcgacttatattgtggaagtacctatcttggaaaaagaaaatcaaactgataaaccaagtattctaccacaatttaaaaggaataaagcacaagaaaactcaaaacttgatgaaaaggtagaagaaccaaagactagtgagaaggtagaaaaagaaaaactttctgaaactgggaatagtactagtaattcaacgttagaagaagttcctacagtggatcctgtacaagaaaaagtagcaaaatttgctgaaagttatgggatgaagctagaaaatgtcttgtttaatatggacggaacaattgaattatatttaccatcaggagaagtcattaaaaagaatatggcagattttacaggagaagcacctcaaggaaatggtgaaaataaaccatctgaaaatggaaaagtatctactggaacagttgagaaccaaccaacagaaaataaaccagcagattctttaccagaggcaccaaacgaaaaacctgtaaaaccagaaaactcaacggataatggaatgttgaatccagaagggaatgtggggagtgaccctatgttagatccagcattagaggaagctccagcagtagatcctgtacaagaaaaattagaaaaatttacagctagttacggattaggcttagatagtgttatattcaatatggatggaacgattgaattaagattgccaagtggagaagtgataaaaaagaatttatctgatttcatagcgtaa
>vaccine3~~~phtE_Hungary19A_6~~~33~~~[Streptococcus_pneumoniae Hungary19A_6_SPH_1105]
atgaaatttagtaaaaaatatatagcagctggatcagctgttatcgtatccttgagtctatgtgcctatgcactaaaccagcatcgttcgcaggaaaataaggacaataatcgtgtctcttatgtggatggcagccagtcaagtcagaaaagtgaaaacttgacaccagaccaggttagccagaaagaaggaattcaggctgagcaaattgtaatcaaaattacagatcagggctatgtaacgtcacacggtgaccactatcattactataatgggaaagttccttatgatgccctctttagtgaagaactcttgatgaaggatccaaactatcaacttaaagacgctgatattgtcaatgaagtcaagggtggttatatcatcaaggtcgatggaaaatattatgtctacctgaaagatgcagctcatgctgataatgttcgaactaaagatgaaatcaatcgtcaaaaacaagaacatgtcaaagataatgagaaggttaactctaatgttgctgtagcaaggtctcagggacgatatacgacaaatgatggttatgtctttaatccagctgatattatcgaagatacgggtaatgcttatatcgttcctcatggaggtcactatcactacattcccaaaagcgatttatctgctagtgaattagcagcagctaaagcacatctggctggaaaaaatatgcaaccgagtcagttaagctattcttcaacagctagtgacaataacacgcaatctgtagcaaaaggatcaactagcaagccagcaaataaatctgaaaatctccagagtcttttgaaggaactctatgattcacctagcgcccaacgttacagtgaatcagatggcctggtctttgaccctgctaagattatcagtcgtacaccaaatggagttgcgattccgcatggcgaccattaccactttattccttacagcaagctttctgctttagaagaaaagattgccagaatggtgcctatcagtggaactggttctacagtttctacaaatgcaaaacctaatgaagtagtgtctagtctaggcagtctttcaagcaatccttcttctttaacgacaagtaaggagctctcttcagcatctgatggttatatttttaatccaaaagatatcgttgaagaaacggctacagcttatattgtaagacatggtgatcatttccattacattccaaaatcaaatcaaattgggcaaccgactcttccaaacaatagtctagcaacaccttctccatctcttccaatcaatccaggaacttcacatgagaaacatgaagaagatggatacggatttgatgctaatcgtattatcgctgaagatgaatcaggttttgtcatgagtcacggagaccacaatcattatttcttcaagaaggacttgacagaagagcaaattaaggctgcgcaaaaacatttagaggaagttaaaactagtcataatggattagattctttgtcatctcatgaacaggattatccaggtaatgccaaagaaatgaaagatttagataaaaaaatcgaagaaaaaattgctggcattatgaaacaatatggtgtcaaacgtgaaagtattgtcgtgaataaagaaaaaaatgcgattatttatccgcatggagatcaccatcatgcagatccgattgatgaacataaaccggttggaattggtcattctcacagtaactatgaactgtttaaacccgaagaaggagttgctaaaaaagaagggaataaagtttatactggagaagaattaacgaatgttgttaatttgttaaaaaatagtacgtttaataatcaaaactttactctagccaatggtcaaaaacgcgtttcttttagttttccgcctgaattggagaaaaaattaggtatcaatatgctagtaaaattaataacaccagatggaaaagtattggagaaagtatctggtaaagtatttggagaaggagtagggaatattgcaaactttgaattagatcaaccttatttaccaggacaaacatttaagtatactatcgcttcaaaagattatccagaagtaagttatgatggtacatttacagttccaacctctttagcttacaaaatggccagtcaaacgattttctatcctttccatgcaggggatacttatttaagagtgaaccctcaatttgcagtgcctaaaggaactgatgctttagtcagagtgtttgatgaatttcatggaaatgcttatttagaaaataactataaagttggtgaaatcaaattaccgattccgaaattaaaccaaggaacaaccagaacggccggaaataaaattcctgtaaccttcatggcaaatgcttatttggacaatcaatcgacttatattgtggaagtacctatcttggaaaaagaaaatcaaactgataaaccaagtattctaccacaatttaaaaggaataaagcacaagaaaactcaaaacttgatgaaaaggtagaagaaccaaagactagtgagaaggtagaaaaagaaaaactttctgaaactgggaatagtactagtaattcaacgttagaagaagttcctacagtggatcctgtacaagaaaaagtagcaaaatttgctgaaagttatgggatgaagctagaaaatgtcttgtttaatatggacggaacaattgaattatatttaccatcaggagaagtcattaaaaagaatatggcagattttacaggagaagcacctcaaggaaatggtgaaaataaaccatctgaaaatggaaaagtatctactggaacagttgagaaccaaccaacagaaaataaaccagcagattctttaccagaggcaccaaacgaaaaacctgtaaaaccagaaaactcaacggataatggaatgttgaatccagaagggaatgtggggagtgaccctatgttagatccagcattagaggaagctccagcagtagatcctgtacaagaaaaattagaaaaatttacagctagttacggattaggcttagatagtgttatattcaatatggatggaacgattgaattaagattgccaagtggagaagtgataaaaaagaatttatctgatttcatagcgtaa
>vaccine3~~~phtE_TIGR4~~~34~~~[Streptococcus_pneumoniae TIGR4_SP_1004]
atgaaatttagtaaaaaatatatagcagctggatcagctgttatcgtatccttgagtctatgtgcctatgcactaaaccagcatcgttcgcaggaaaataaggacaataatcgtgtctcttatgtggatggcagccagtcaagtcagaaaagtgaaaacttgacaccagaccaggttagccagaaagaaggaattcaggctgagcaaattgtaatcaaaattacagatcagggctatgtaacgtcacacggtgaccactatcattactataatgggaaagttccttatgatgccctctttagtgaagaactcttgatgaaggatccaaactatcaacttaaagacgctgatattgtcaatgaagtcaagggtggttatatcatcaaggtcgatggaaaatattatgtctacctgaaagatgcagctcatgctgataatgttcgaactaaagatgaaatcaatcgtcaaaaacaagaacatgtcaaagataatgagaaggttaactctaatgttgctgtagcaaggtctcagggacgatatacgacaaatgatggttatgtctttaatccagctgatattatcgaagatacgggtaatgcttatatcgttcctcatggaggtcactatcactacattcccaaaagcgatttatctgctagtgaattagcagcagctaaagcacatctggctggaaaaaatatgcaaccgagtcagttaagctattcttcaacagctagtgacaataacacgcaatctgtagcaaaaggatcaactagcaagccagcaaataaatctgaaaatctccagagtcttttgaaggaactctatgattcacctagcgcccaacgttacagtgaatcagatggcctggtctttgaccctgctaagattatcagtcgtacaccaaatggagttgcgattccgcatggcgaccattaccactttattccttacagcaagctttctgccttagaagaaaagattgccagaatggtgcctatcagtggaactggttctacagtttctacaaatgcaaaacctaatgaagtagtgtctagtctaggcagtctttcaagcaatccttcttctttaacgacaagtaaggagctctcttcagcatctgatggttatatttttaatccaaaagatatcgttgaagaaacggctacagcttatattgtaagacatggtgatcatttccattacattccaaaatcaaatcaaattgggcaaccgactcttccaaacaatagtctagcaacaccttctccatctcttccaatcaatccaggaacttcacatgagaaacatgaagaagatggatacggatttgatgctaatcgtattatcgctgaagatgaatcaggttttgtcatgagtcacggagaccacaatcattatttcttcaagaaggacttgacagaagagcaaattaaggctgcgcaaaaacatttagaggaagttaaaactagtcataatggattagattctttgtcatctcatgaacaggattatccaagtaatgccaaagaaatgaaagatttagataaaaaaatcgaagaaaaaattgctggcattatgaaacaatatggtgtcaaacgtgaaagtattgtcgtgaataaagaaaaaaatgcgattatttatccgcatggagatcaccatcatgcagatccgattgatgaacataaaccggttggaattggtcattctcacagtaactatgaactgtttaaacccgaagaaggagttgctaaaaaagaagggaataaagtttatactggagaagaattaacgaatgttgttaatttgttaaaaaatagtacgtttaataatcaaaactttactctagccaatggtcaaaaacgcgtttcttttagttttccgcctgaattggagaaaaaattaggtatcaatatgctagtaaaattaataacaccagatggaaaagtattggagaaagtatctggtaaagtatttggagaaggagtagggaatattgcaaactttgaattagatcaaccttatttaccaggacaaacatttaagtatactatcgcttcaaaagattatccagaagtaagttatgatggtacatttacagttccaacctctttagcttacaaaatggccagtcaaacgattttctatcctttccatgcaggggatacttatttaagagtgaaccctcaatttgcagtgcctaaaggaactgatgctttagtcagagtgtttgatgaatttcatggaaatgcttatttagaaaataactataaagttggtgaaatcaaattaccgattccgaaattaaaccaaggaacaaccagaacggccggaaataaaattcctgtaaccttcatggcaaatgcttatttggacaatcaatcgacttatattgtggaagtacctatcttggaaaaagaaaatcaaactgataaaccaagtattctaccacaatttaaaaggaataaagcacaagaaaacttaaaacttgatgaaaaggtagaagaaccaaagactagtgagaaggtagaaaaagaaaaactttctgaaactgggaatagtactagtaattcaacgttagaagaagttcctacagtggatcctgtacaagaaaaagtagcaaaatttgctgaaagttatgggatgaagctagaaaatgtcttgtttaatatggacggaacaattgaattatatttaccatcgggagaagtcattaaaaagaatatggcagattttacaggagaagcacctcaaggaaatggtgaaaataaaccatctgaaaatggaaaagtatctactggaacagttgagaaccaaccaacagaaaataaaccagcagattctttaccagaggcaccaaacgaaaaacctgtaaaaccagaaaactcaacggataatggaatgttgaatccagaagggaatgtggggagtgaccctatgttagatccagcattagaggaagctccagcagtagatcctgtacaagaaaaattagaaaaatttacagctagttacggattaggcttagatagtgttatattcaatatggatggaacgattgaattaagattgccaagtggagaagtgataaaaaagaatttatctgatctcatagcgtaa
>vaccine3~~~cbpD_CGSP14~~~35~~~[Streptococcus_pneumoniae CGSP14]
ATGAAAATTTTACCGTTTATAGCAAGAGGAACAAGTTATTACTTGAAGATGTCAGTTAAA
AAGCTTGTTCCTTTTTTAGTAGTAGGATTGATGCTAGCAGCTGGTGATAGTGTCTATGCC
TATTCCAGAGGAAATGGATCGATTGCGCGTGGGGATGATTATCCTGCTTATTATAAAAAT
GGGAGCCAGGAGATTGATCAGTGGCGCATGTATTCTCGTCAATGTACTTCTTTTGTAGCC
TTTCGTTTGAGTAATGTCAATGGTTTTGAAATTCCGGCAGCTTATGGAAATGCGAATGAA
TGGGGACATCGTGCTCGTCGGGAAGGTTATCGTGTAGATAATACACCGACGATTGGTTCC
ATTACTTGGTCTACTGCAGGAACTTATGGTCATGTTGCCTGGGTGTCAAATGTAATGGGA
GATCAGATTGAGATTGAGGAATATAACTATGGTTATACAGAATCCTATAATAAACGAATT
ATAAAAGCAAACACGATGACAGGATTTATTCATTTTAAAGATTTGGATGGTGGCAGTGTT
GGGAATAGTCAATCCTCAACTTCAACAGGCGGAACTCATTATTTTAAGACCAAGTCTGCT
ATTAAAACTGAACCCCTAGTTAGTGCAACTGTGATTGATTACTATTATCCTGGAGAGAAG
GTTCATTATGATCAAATTCTCGAAAAAGACGGCTACAAGTGGTTGAGTTATACTGCCTAT
AATGGAAGCTATCGTTATGTTCAATTGGAGGCTGTGAATAAAAATCCTCTAGGTAATTCT
GTTCTTTCTTCAACAGGTGGAACTCATTATTTTAAGACCAAGTCTGCTATCAAAACTGAA
CCCCTAGTTAGTGCAACTGTGATTGATTACTATTATCCTGGGGAGAAGGTTCATTATGAT
CAGATACTTGAAAAAGACGGCTACAAGTGGTTGAGTTATACGGCTTATAACGGAAGTCGT
CGCTATATACAGCTAGAGGGAGTGACTTCTTCACAAAATTATCAGAATCAATCAGGAAAT
ATCTCTAGCTATGGATCCAATAATAGTTCAACTGTCGGTTGGAAGAAAATAAATGGTAGT
TGGTATCATTTCAAATCAAATGGTTCTAAATCAACAGGATGGCTGAAAGACGGTTCTAGC
TGGTATTATTTGAAATTATCTGGTGAAATGCAGACAGGATGGTTAAAGGAGAATGGCTCG
TGGTATTATCTGGGTAGTTCAGGGGCAATGAAAACAGGCTGGTACCAGGTCTCTGGTAAG
TGGTATTATTCTTACTCTTCAGGCGCCTTAGCTGTTAATACGACGGTGGATGGCTACAGA
GTAAACAGTGATGGAGAACGAGTATAG
>vaccine3~~~cbpD_D39~~~36~~~[Streptococcus_pneumoniae D39]
ATGAAAATTTTACCGTTTATAGCAAGAGGAACAAGTTATTACTTGAAGATGTCAGTTAAA
AAGCTTGTTCCTTTTTTAGTAGTAGGATTGATGCTAGCAGCTGGTGATAGTGTCCATGCC
TATTCCAGAGGAAATGGATCGATTGCGCGTGGGGATGATTATCCTGCTTATTATAAAAAT
GGGAGCCAGGAGATTGATCAGTGGCGCATGTATTCTCGTCAGTGTACTTCTTTTGTAGCC
TTTCGTTTGAGTAATGTCAATGGTTTTGAAATTCCGGCAGCTTATGGAAATGCGAATGAA
TGGGGACATCGTGCTCGTCGGGAAGGTTATCGTGTAGATAATACACCGACGATTGGTTCC
ATTACTTGGTCTACTGCAGGAACTTATGGTCATGTTGCCTGGGTGTCAAATGTAATGGGA
GATCAGATTGAGATTGAGGAATATAACTATGGTTATACAGAATCCTATAATAAACGAGTT
ATAAAAGCAAACACGATGACAGGATTTATTCATTTTAAAGATTTGGATAGTGGCAGTGTT
GGGAATAGTCAATCCTCAGCTTCAACAGGCGGAACTCATTATTTTAAGACCAAGTCTGCT
ATTAAAACTGAACCCCTAGTTAGTGCAACTGTGATTGATTACTATTATCCTGGGGAGAAG
GTTCATTATGATCAGATACTTGAAAAAGACGGCTATAAGTGGTTGAGTTATACTGCCTAT
AATGGAAGCTATCGTTATGTTCAATTGGAGGCTGTGAATAAAAATCCTCTAGGTAATTCT
GTTCTTTCTTCAACAGGAGGAACTCATTATTTTAAGATCAAGTCTGCTATTAAAACTGAA
CCCCTAGTTAGTGCAACTGTGATTGATTACTATTATCCTGGAGAGAAGGTTCATTATGAT
CAGATACTTGAAAAAGACGGCTATAAGTGGTTGAGTTATACGGCTTATAACGGAAGTCGT
CGCTATATACAGCTAGAGGGAGTGACTTCTTCACAAAATTATCAGAATCAATCAGGAAAT
ATCTCTAGCTATGGATCCAATAATAGTTCAACTGTCGGTTGGAAGAAAATAAATGGTAGT
TGGTATCATTTCAAATCAAATGGTTCTAAATCAACAGGATGGCTGAAAGACGGTTCTAGC
TGGTATTATTTGAAATTATCTGGTGAAATGCAGACAGGATGGTTAAAGGAGAATGGCTCG
TGGTATTATCTGGGTAGTTCAGGGGCAATGAAAACAGGCTGGTACCAGGTCTCTGGTGAG
TGGTATTATTCTTACTCTTCAGGCGCCTTAGCTATTAATACGACGGTGGATGGCTACAGA
GTAAACAGTGATGGAGAACGAGTATAG
>vaccine3~~~cbpD_Hungary19A_6~~~37~~~[Streptococcus_pneumoniae Hungary19A_6]
ATGAAAATTTTACCGTTTATAGCAAGAGGAACAAGTTATTACTTGAAGATGTCAGTTAAA
AAGCTTGTTCCTTTTTTAGTAGTAGGATTGATGCTAGCAGCTGGTGATAGTGTCTATGCC
TATTCCAGAGGAAATGGATCGATTGCGCGTGGGGATGATTATCCTGCTTATTATAAAAAT
GGGAGCCAGGAGATTGATCAGTGGCGCATGTATTCTCGTCAATGTACTTCTTTTGTAGCC
TTTCGTTTGAGTAATGTCAATGGTTTTGAAATTCCGGCAGCTTATGGAAATGCGAATGAA
TGGGGACATCGTGCTCGTCGGGAAGGTTATCGTGTAGATAATACACCGACGATTGGTTCC
ATTACTTGGTCTACTGCAGGAACTTATGGTCATGTTGCCTGGGTGTCAAATGTAATGGGA
GATCAGATTGAGATTGAGGAATATAACTATGGTTATACAGAATCCTATAATAAACGAATT
ATAAAAGCAAACACGATGACAGGATTTATTCATTTTAAAGATTTGGATGGTGGCAGTGTT
GGGAATAGTCAATCCTCAACTTCAACAGGCGGAACTCATTATTTTAAGACCAAGTCTGCT
ATTAAAACTGAACCCCTAGTTAGTGCAACTGTGATTGATTACTATTATCCTGGAGAGAAG
GTTCATTATGATCAAATTCTCGAAAAAGACGGCTACAAGTGGTTGAGTTATACTGCCTAT
AATGGAAGCTATCGTTATGTTCAATTGGAGGCTGTGAATAAAAATCCTCTAGGTAATTCT
GTTCTTTCTTCAACAGGTGGAACTCATTATTTTAAGACCAAGTCTGCTATCAAAACTGAA
CCCCTAGTTAGTGCAACTGTGATTGATTACTATTATCCTGGGGAGAAGGTTCATTATGAT
CAGATACTTGAAAAAGACGGCTACAAGTGGTTGAGTTATACGGCTTATAACGGAAGTCGT
CGCTATATACAGCTAGAGGGAGTGACTTCTTCACAAAATTATCAGAATCAATCAGGAAAT
ATCTCTAGCTATGGATCCAATAATAGTTCAACTGTCGGTTGGAAGAAAATAAATGGTAGT
TGGTATCATTTCAAATCAAATGGTTCTAAATCAACAGGATGGCTGAAAGATGGTTCTAGC
TGGTATTATTTGAAATTATCTGGTGAAATGCAGACAGGATGGTTAAAGGAGAATGGCTCG
TGGTATTATCTGGGTAGTTCAGGGGCAATGAAAACAGGCTGGTACCAGGTCTCTGGTAAG
TGGTATTATTCTTACTCTTCAGGCGCCTTAGCTGTTAATACGACGGTGGATGGCTACAGA
GTAAACAGTGATGGAGAACGAGTATAG
>vaccine3~~~cbpD_R6~~~38~~~[Streptococcus_pneumoniae R6]
ATGAAAATTTTACCGTTTATAGCAAGAGGAACAAGTTATTACTTGAAGATGTCAGTTAAA
AAGCTTGTTCCTTTTTTAGTAGTAGGATTGATGCTAGCAGCTGGTGATAGTGTCTATGCC
TATTCCAGAGGAAATGGATCGATTGCGCGTGGGGATGATTATCCTGCTTATTATAAAAAT
GGGAGCCAGGAGATTGATCAGTGGCGCATGTATTCTCGTCAGTGTACTTCTTTTGTAGCC
TTTCGTTTGAGTAATGTCAATGGTTTTGAAATTCCGGCAGCTTATGGAAATGCGAATGAA
TGGGGACATCGTGCTCGTCGGGAAGGTTATCGTGTAGATAATACACCGACGATTGGTTCC
ATTACTTGGTCTACTGCAGGAACTTATGGTCATGTTGCCTGGGTGTCAAATGTAATGGGA
GATCAGATTGAGATTGAGGAATATAACTATGGTTATACAGAATCCTATAATAAACGAGTT
ATAAAAGCAAACACGATGACAGGATTTATTCATTTTAAAGATTTGGATAGTGGCAGTGTT
GGGAATAGTCAATCCTCAGCTTCAACAGGCGGAACTCATTATTTTAAGACCAAGTCTGCT
ATTAAAACTGAACCCCTAGTTAGTGCAACTGTGATTGATTACTATTATCCTGGGGAGAAG
GTTCATTATGATCAGATACTTGAAAAAGACGGCTATAAGTGGTTGAGTTATACTGCCTAT
AATGGAAGCTATCGTTATGTTCAATTGGAGGCTGTGAATAAAAATCCTCTAGGTAATTCT
GTTCTTTCTTCAACAGGAGGAACTCATTATTTTAAGATCAAGTCTGCTATTAAAACTGAA
CCCCTAGTTAGTGCAACTGTGATTGATTACTATTATCCTGGAGAGAAGGTTCATTATGAT
CAGATACTTGAAAAAGACGGCTATAAGTGGTTGAGTTATACGGCTTATAACGGAAGTCGT
CGCTATATACAGCTAGAGGGAGTGACTTCTTCACAAAATTATCAGAATCAATCAGGAAAT
ATCTCTAGCTATGGATCCAATAATAGTTCAACTGTCGGTTGGAAGAAAATAAATGGTAGT
TGGTATCATTTCAAATCAAATGGTTCTAAATCAACAGGATGGCTGAAAGACGGTTCTAGC
TGGTATTATTTGAAATTATCTGGTGAAATGCAGACAGGATGGTTAAAGGAGAATGGCTCG
TGGTATTATCTGGGTAGTTCAGGGGCAATGAAAACAGGCTGGTACCAGGTCTCTGGTGAG
TGGTATTATTCTTACTCTTCAGGCGCCTTAGCTATTAATACGACGGTGGATGGCTACAGA
GTAAACAGTGATGGAGAACGAGTATAG
>vaccine3~~~cbpD_TIGR4~~~39~~~[Streptococcus_pneumoniae TIGR4]
ATGAAAATTTTACCGTTTATAGCAAGAGGAACAAGTTATTACTTGAAGATGTCAGTTAAA
AAGCTTGTTCCTTTTTTAGTAGTAGGATTGATGCTAGCAGCTGGTGATAGTGTCTATGCC
TATTCCAGAGGAAATGGATCGATTGCGCGTGGGGATGATTATCCTGCTTATTATAAAAAT
GGGAGCCAGGAGATTGATCAGTGGCGCATGTATTCTCGTCAGTGTACTTCTTTTGTAGCC
TTTCGTTTGAGTAATGTCAATGGTTTTGAAATTCCGGCAGCTTATGGAAATGCGAATGAA
TGGGGACATCGTGCTCGTCGGGAAGGTTATCGTGTAGATAATACACCGACGATTGGTTCC
ATTACTTGGTCTACTGCAGGAACTTATGGTCATGTTGCCTGGGTGTCAAATGTAATGGGA
GATCAGATTGAGATTGAGGAATATAACTATGGTTATACAGAATCCTATAATAAACGAGTT
ATAAAAGCAAACACGATGACAGGATTTATTCATTTTAAAGATTTGGATGGTGGCAGTGTT
GGGAATAGTCAATCCTCAACTTCAACAGGCGGAACTCATTATTTTAAGACCAAGTCTGCT
ATTAAAACTGAACCTCTAGCTAGCGGAACTGTGATTGATTACTATTATCCTGGGGAGAAG
GTTCATTATGATCAGATACTTGAAAAAGACGGCTATAAGTGGTTGAGTTATACTGCCTAT
AATGGAAGCTATCGTTATGTTCAATTGGAGGCTGTGAATAAAAATCCTCTAGGTAATTCT
GTTCTTTCTTCAACAGGTGGAACTCATTATTTTAAGACCAAGTCTGCTATCAAAACTGAA
CCCCTAGTTAGTGCAACTGTGATTGATTACTATTATCCTGGAGAGAAGGTTCATTATGAT
CAAATTCTCGAAAAAGACGGCTACAAGTGGTTGAGTTATACGGCTTATAACGGAAGTCGT
CGCTATATACAGCTAGAGGGAGTGACTTCTTCACAAAATTATCAGAATCAATCAGGAAAC
ATCTCTAGCTATGGATCCCATAGTAGTTCAACTGTCGGTTGGAAGAAAATAAATGGTAGT
TGGTATCATTTCAAATCAAATGGTTCTAAATCAACAGGATGGCTGAAAGACGGTTCTAGC
TGGTATTATTTGAAATTATCTGGTGAAATGCAGACAGGATGGTTAAAGGAAAATGGTTTG
TGGTATTATCTGGGTAGTTCAGGGGCAATGAAAACAGGCTGGTACCAGGTCTCTGGTAAG
TGGTATTATTCTTACTCTTCAGGCGCCTTAGCTGTTAATACGACGGTGGATGGCTACAGA
GTAAACAGTGATGGAGAACGAGTATAG
>vaccine3~~~cbpG_CGSP14~~~40~~~[Streptococcus_pneumoniae CGSP14]
TTGATTAAAATTGATAATACTTTACAGTATCCGTATTCGACTTCAGCTATGGTTTTATCT
AAGTATTATGGAGTAGCCGATGGAATGAATGTAGAAGGGAGGGGAAGTGCGAATTTTATT
AAAGATAATGTGTTAATTACAGCGGCTCACAACTACTACAGACATGACTATGGGAAAGAA
GCGGATGATATTTATGTTCTTCCGGCTGTTAGTCCAAGTCAAGAACTATTTGGAAAGATC
AAAGTAAAGGAAGTTCGTTATTTGAAGGAATTTAGAAATTTAAATTCTAAGGATGCAAGG
GAATATGACTTGGCTTTATTAATTCTAGAAGAGCCCATTGGTGCAAAATTAGGGACTTTG
GGTCTTCCTACTAGTCAAAAAAATTTGACAGGAATAACTGTGACTATCACAGGCTATCCA
TCATATAATTTTAAAATTCATCAAATGTATACAGATAAAAAACAAGTTTTAAGTGATGAT
GGCATGTTCTTGGATTACCAAGTTGATACTTTAGAGGGGTCTAGTGGATCTACAGTTTAT
GATGCTAGTCACCGTGTAGTAGGAGTGCATACTTTAGGAGATGGAGCTAATCAAATTAAC
AGTGCAGTTAAATTAAATGAACGAAATTTGCCATTTATTTATTCGGTTCTTAAAGGTTAC
TCTCTTGAAGGATGGAAGAAAATAAATGGTAGTTGGTACCATTATAGACAACATGATAAA
CAAACGGGTTGGCAGGAGATAAATGATACTTGGTATTATTTAGACAGTTCCGGTAAGATG
CTTACAGATTGGCAAAAAGTAAATGGAAAATGGTATTATCTCAATTCAAATGGAGCAATG
GTTACAGGTAGCCAAACTATCGATGGTAAAGTTTATAACTTCGCTTCATCTGGTGAGTGG
ATTTAA
>vaccine3~~~cbpG_R6~~~41~~~[Streptococcus_pneumoniae R6]
TTGATTAAAATTGATAATACTTTACAGTATCCATATTCGACTTCAGCTATGGTTTTATCT
AAGTATTATGGAGTAGCCGATGGAATGAATGTAGAAGGGAGGGGAAGTGCGAATTTTATT
AAAGATAATGTGTTAATTACAGCGGCTCACAACTACTACAGACATGACTATGGGAAAGAA
GCGGATGATATTTATGTTCTTCCGGCTGTTAGTCCAAGTCAAGAACTATTTGGAAAGATC
AAAGTAAAGGAAGTTCGTTATTTGAAGGAATTTAGAAATTTAAATTCTAAGGATGCAAGG
GAATATGACTTGGCTTTATTAATTCTAGAAAAGCCCATTGGTGCAAAATTAGGGACTTTG
GGTCTTCCTACTAGTCAAAAAAATTTGACAGGAATAACTGTGACTATCACAGGCTATCCA
TCATATAATTTTAAAATTCATCAAATGTATACAGATAAAAAACAAGTTTTAAGTGATGAT
GGCATGTTCTTGGATTACCAAGTTGATACTTTAGAGGGGTCTAGTGGATCTACAGTTTAT
GATGCTAGTCACCGTGTAGTAGGAGTGCATACTTTAGGAGATGGAGCTAATCAAATTAAC
AGTGCAGTTAAATTAAATGAACGAAATTTGCCATTTATTTATTTATTCGGTTCTTAA
>vaccine3~~~cbpG_TIGR4~~~42~~~[Streptococcus_pneumoniae TIGR4]
ATGGTTTTATCTAAGTATTATGGAGTAGCCGATGGAATGAATGTAGAAGGGAGGGGAAGT
GCGAATTTTATTAAAGATAATGTGTTAATTACAGCGGCTCACAACTACTACAGACATGAC
TATGGGAAAGAAGCGGATGATATTTATGTTCTTCCGGCTGTTAGTCCAAGTCAAGAACCA
TTTGGAAAGATCAAAGTAAAGGAAGTTCGTTATTTGAAGGAATTTAGAAATTTAAATTCT
AAGGATGCAAGGGAATATGACTTGGCTTTATTAATTCTAGAAGAGCCCATTGGTGCAAAA
TTAGGGACTTTGGGTCTTCCTACTAGTCAAAAAAATTTGACAGGAATAACTGTGACTATC
ACAGGCTATCCATCATATAATTTTAAAATTCATCAAATGTATACAGATAAAAAACAAGTT
TTAAGTGATGATGGCATGTTCTTGGATTACCAAGTTGATACTTTAGAGGGGTCTAGTGGA
TCTACAGTTTATGATGCTAGTCACCGTGTAGTAGGAGTGCATACTTTAGGAGATGGAGCT
AATCAAATTAACAGTGCAGTTAAATTAAATGAACGAAATTTGCCATTTATTTATTCGGTT
CTTAAAGGTTACTCTCTTGAAGGATGGAAGAAAATAAATGGTAGTTGGTACCATTATAGA
CAACATGATAAACAAACGGGTTGGCAGGAGATAAATGATACTTGGTATTATTTAGACAGT
TCCGGTAAGATGCTTACAGATTGGCAAAAAGTAAATGGAAAATGGTATTATCTCAATTCA
AATGGAGCAATGGTTACAGGTAGCCAAACTATCGATGGTAAAGTTTATAACTTCGCTTCA
TCTGGTGAGTGGATTTAA
>vaccine3~~~hysA_R6~~~43~~~[Streptococcus_pneumoniae R6]
TTGATTTTACAATATGTTTATTGGAGTGTATACATGCAAACAAAAACAAAGAAGCTCATT
GTGAGTTTGTCTTCACTTGTTTTATCAGGATTTTTATTAAACCATTATATGACAGTTGGA
GCGGAAGAAACGACTACGAATACCATTCAGCAAAGCCAGAAGGAAGTTCAGTATCAGCAA
AGGGATACAAAAAATTTAGTTGAAAATGGTGATTTTGGTCAGACGGAGGACGGAAGCAGT
CCGTGGACAGGAAGCAAAGCTCAGGGGTGGTCAGCTTGGGTAGACCAGAAGAATAGTTCT
GCAGATGCCTCAACTCGAGTCATTGAGGCTAAGGATGGGGCTATCACTATCTCAAGCCCT
GAGAAATTAAGGGCAGCGGTTCACCGTATGGTTCCTATTGAAGCTAAGAAAAAGTATAAA
CTGCGTTTCAAGATTAAAACAGATAATAAAGTCGGGATTGCCAAAGTTCGTATCATTGAG
GAAAGTGGTAAGGACAAGCGATTGTGGAATTCTGCAACGACGTCAGGAACAAAGGACTGG
CAGACCATTGAAGCAGACTATAGCCCGACTTTAGATGTTGATAAAATCAAGCTGGAGTTA
TTCTATGAAACAGGAACTGGGACTGTTTCCTTTAAGGATATTGAGCTGGTAGAGGTAGCA
GACCAGCCTTCTGAGGATTCTCAAACAGATAAACAACTTGAGGAAAAGATTGATTTACCA
ATTGGAAAAAAACATGTTTTTTCTCTTGCGGACTATACTTATAAGGTAGAAAATCCTGAC
GTTGCTTCAGTCAAAAATGGAATTTTAGAACCTCTTAAGGAAGGGACAACCAATGTCATT
GTCAGTAAAGATGGCAAGGAAGTGAAAAAGATTCCTTTGAAGATTCTAGCCTCTGTTAAG
GATACATACACAGACCGTTTGGATGACTGGAATGGCATCATCGCTGGGAATCAATACTAT
GATTCTAAAAATGAACAGATGGCCAAATTAAACCAGGAATTGGAAGGAAAGGTAGCTGAT
AGCCTATCCAGTATTTCAAGTCAGGCGGACCGCATCTATTTGTGGGAAAAATTTTCAAAT
TATAAAACGTCTGCAAATCTGACTGCCACTTATCGGAAATTGGAGGAGATGGCCAAGCAA
GTGACCAATCCTTCTTCTCGTTATTATCAAGATGAAACTGTCGTTCGAACAGTCAGGGAT
TCCATGGAATGGATGCATAAACATGTCTACAATAGTGAAAAGAGCATTGTTGGGAACTGG
TGGGATTATGAAATCGGTACACCTCGTGCCATCAACAATACCTTGTCTCTGATGAAAGAA
TACTTCTCTGATGAGGAAATTAAAAAATATACAGATGTGATTGAAAAATTTGTACCAGAT
CCCGAACATTTCCGAAAGACGACTGATAACCCATTCAAGGCTCTAGGTGGAAACTTAGTT
GATATGGGAAGGGTAAAAGTAATAGCTGGTTTACTGCGTAAGGATGATCAAGAAATTTCT
TCTACCATTCGCTCGATTGAGCAAGTGTTCAAGTTGGTAGACCAAGGTGAAGGTTTTTAT
CAAGATGGATCCTATATCGACCACACCAATGTTGCCTATACGGGTGCTTATGGGAATGTT
TTGATTGATGGCCTGTCTCAACTGTTGCCAGTCATTCAAAAGACCAAGAATCCAATCGAT
AAAGATAAAATGCAAACCATGTACCACTGGATTGATAAATCGTTTGCTCCTTTGCTGGTG
AATGGAGAGCTGATGGATATGAGTCGTGGACGCTCGATCAGTCGTGCAAATAGCGAGGGG
CACGTGGCCGCAGTAGAAGTACTAAGAGGGATTCACCGAATAGCGGATATGTCTGAAGGA
GAAACCAAACAACGTTTGCAGAGTCTTGTGAAGACCATTGTTCAATCGGATAGTTATTAT
GATGTCTTTAAGAATTTGAAGACTTATAAGGATATCAGTTTGATGCAATCCTTGTTAAGT
GATGCAGGAGTCGCAAGTGTTCCAAGAACAAGTTACCTATCTGCCTTTAACAAGATGGAT
AAAACAGCCATGTACAATGCAGAGAAAGGGTTTGGATTTGGCTTGTCACTCTTTTCCAGT
CGTACCTTGAATTACGAACACATGAACAAGGAAAATAAACGTGGTTGGTATACGAGTGAT
GGGATGTTCTATCTTTACAATGGCGATTTGAGTCACTATAGCGATGGCTACTGGCCAACA
GTTAATCCATATAAGATGCCTGGTACAACAGAGACGGATGCTAAGAGAGCGGATAGCGAT
ACAGGTAAAGTTTTACCGTCTGCTTTCGTTGGAACGAGCAAACTAGATGATGCCAATGCG
ACAGCAACCATGGATTTCACCAACTGGAATCAAACATTGACTGCTCATAAGAGCTGGTTT
ATGCTAAAGGATAAGATTGCCTTTTTAGGAAGCAATATCCAAAACACTTCAACAGATACT
GCTGCAACTACAATTGACCAGAGAAAACTGGAATCAAGTAATCCATATAAAGTCTATGTC
AATGATAAAGAAGCCTCCCTTACAGAACAAGAAAAGGATTATCCTGAAACCCAAAGTGTC
TTTTTAGAATCGTCCGATTCGAAAAAGAATATTGGTTACTTTTTCTTTAAGAAGAGTTCA
ATCAGTATGAGTAAGGCTTTGCAAAAGGGAGCCTGGAAGGATATCAATGAAGGACAGTCA
GACAAGGAAGTTGAAAATGAATTTCTTACGATTAGTCAGGCTCATAAGCAAAATGGAGAT
TCTTATGGCTATATGCTCATTCCTAACGTGGATCGTGCCACCTTCAATCAAATGATAAAA
GAGTTAGAAAGTAGCCTCATCGAAAATAACGAAACCCTTCAGTCTGTTTATGATGCCAAA
CAAGGAGTTTGGGGCATTGTGAAATATGATGATTCTGTCTCTACTATTTCCAACCAATTC
CAAGTTTTGAAACGTGGAGTCTATACTATTCGAAAAGAAGGGGATGAATATAAGATTGCC
TACTATAATCCTGAAACCCAGGAATCAGCTCCAGATCAGGAAGTCTTTAAAAAGCTAGAG
CAAGCAGCTCAGCCACAAGTACAGAATTCAAAAGAAAAGGAAAAATCTGAAGAGGAAAAG
AACCATTCGGATCAAAAGAATCTCCCTCAGACAGGAGAAGGTCAGTCAATCTTGGCAAGT
CTAGGGTTCTTGCTACTTGGGGCGTTTTATTTATTCCGTAGAGGAAAGAACAACTAA
>vaccine3~~~iga_CGSP14~~~44~~~[Streptococcus_pneumoniae CGSP14]
ATGGAAAAGTATTTTGGTGAAAAACAAGAGCGTTTTTCATTTAGAAAATTATCAGTAGGA
CTTGTATCTGCAACGATTTCAAGTTTATTTTTTATGTCTGTATTAGCTAGTTCATCTGTG
GATGCTCAAGAAACTGCGGGAGTTCACTATAAATATGTGGCAGATTCAGAGCTATCATCA
GAAGAAAAGAAGCAGCTTGTCTATGATATTCCGACATACGTGGAGAATGATGATGAAACT
TATTATCTTGTTTATAAGTTAAATTCTCAAAATCAACTGGCGGAATTACCAAATACTGGA
AGCAAGAATGAGAGGCAAGCCCTAGTTGCTGGTGCTAGCTTAGCTGCTCTGGGAATTTTA
ATTTTTGCTGTTTCCAAGAAAAAGGTTAAGAATAAAACGGTATTACATTTAGTATTGGTT
GCAGGAATAGGAAATGGTGTCTTAGTTTCAGTCCATGCTTTAGAAAATCATCTTTTGCTA
AATTACAATACGGACTATGAATTGACCTCTGGAGAAAAATTACCTCTTCCTAAAGAGATT
TCAGGTTACACTTATATTGGATATATCAAAGAGGGAAAAACGACTTCTGATTTTGAAGTA
AGTAATCAAGAAAAATCAGCAGCCACTCCTACAAAACAACAAAAGGTGGATTATAATGTT
ACACCAAATTTTGTAGACCATCCATCAACAGTACAAGCTATTCAGGAACAAACACCTGTT
TCTTCAACTAAGCCGACAGAAGTTCAAGTAGTTGAAAAACCTTTCTCTACTAAATTAATC
AATCCAAGAAAAGAAGAGAAACAATCTTCAGATTCTCAAGAACAATTAGCCGAACATAAG
AATCTAGAAACGAAGAAAGAGGAGAAGATTTCTCCAAAAGAAAAGACTGGGGTAAATACA
TTAAATCCACAGGATGAAGTTTTATCAGGTCAATTGAACAAACCTGAACTCTTATATCGT
GAGGAAACTATAGAGACAAAAATAGATTTTCAAGAAGAAACTCAAGAAAATCCTGATTTA
GCTGAAGGAACTGTAAGAGTAAAACAAGAAGGTAAATTAGGTAAGAAAGTTGAAATCGTC
AGAATATTCTCTGTAAACAAGGAAGAAGTTTCGCGAGAAATTGTTTCAACTTCAACGACT
GCGCCTAGTCCAAGAATAGTCGAAAAAGGTACTAAAAAAACTCAAGTTATAAAGGAACAA
CCTGAGACTGGTGTAGAACATAAGGACGTACAGTCTGGAGCTATTGTTGAACCCGCAATT
CAGCCTGAGTTGCCCGAAGCAGTAGTAAGTGATAAAGGCGTACCAGAAGTTCAACCAGCG
TTATCGGAAGCAGTCGTAACCGACAAAGGTGAGCCCGCTGTCCAACCAGAGCTATCGGAA
GCAGTCGTAACCGACAAAGGTGAGCCCGCTGTCCAACCAGAGCTATCGGAAGCAGTCGTA
ACCGACAAAGGTGAGCCCGCTGTCCAACCAGAGCTACCGGAAGCAGTAGTAAGTGATAAA
GGTGAACCAGCAGTCCAACCAGAGCTACCGGAAGCGGTTGTGACTGACAAAGGTGAGACT
GAGGTTCAACCAGAGTCGCCAGATACTGTGGTAAGTGATAAAGGTGAACCTAAACAGGTA
GCACCGCTTCCAGAATATACAGGACCACAAGCCAGCGCTATTGTTGAACCAGAGCAGGTA
GCACCACTACCAGAATACACAGGGGTACAAGCCGGATCGATAGTCGAGCCAGAGAAAGTA
GAAGCACCGAAAGAATATACTGGTAAAATCGAACAACCTAGTGCAGAAGATACTAAACCT
GAAAATGAGGCAAGCTCTACAAATGGGGAATCGGAACGTCCTAAAGATAAAATTAAAGAA
GAAAAACAAGTCGACAAGAAACTAGAACTTAGAAATGTTTCAAACGTGGAATTATATACG
GTAGAAAATAATAAATATCGACATATTACGGCTGTAGATGGTGCTTTAGATAGTTCATTG
AAGTATTTCATGAAGGTAAAATCAGAAAATTTTAAAGATATAATGTTGCCTGTTACTAAA
ATTGAAAGTACAACAAAAAACAATAAAGAAGTATACAAAATTGTGGCTCATGCAGAAAAT
CTAATTCAACACGAAAACAATGTTATTTCGAATGACTATACATATTATTTACCAAAAACT
CAGCAAAGTGAAACTGGCGTCTATACATCATTTAAAAATTTAGTTGATGCAATGAATAGT
GACCCTAATGGAACATTCCATTTAGGTGCAACTATGGATGCTCGTGAAGTTGAACTTCCG
GATGATCAAGAAAGTTATGTAAAAAATGAATTTTACGGAAAATTAATAGGTGAAAATAAT
GGTAAGTATTATGCTATTTATAACTTGAAAAAACCTTTATTTAAAACTCTAAACACCGCT
ACTATTCAGAATCTTTCAATAAAAGAAGCGAATGTTTCTTCTAAAGAAGATGCTGCTACA
ATATCGAAAGAAGCAAAATACAATACTCTTATAGATAATGTTCATTCTGATGGTATTATA
GCTGGTGAACGTGGAATTGGTGGATTGGTTTCAAAAGTAGATAACTCGAGAATTTCTAAT
AGTAGTTTTACAGGCAGAATAACTAACACATATGATACAACTGCAGGGTATGAAATTGGT
GGTTTAGTAGGTAAACTTTCTGGTTCGCTTGCTTCTATAGAGAAATCAATAGCATCGATT
GACATAGCCTCTAATGCAAAATCAGGAGATCAAATTGTTGGTGGTATAGCCGGAGTTGTT
GAGAAAAGTGCGACAATTAAGTATAGCTATGTTGAAGGAAATGTTAACAATGTGCGACAC
TTTGGTAAAGTTGGGGGAGTTGCAGGTAATCTTTGGGATAGAGATTCACAAGATGTAAGT
AAATCAGGTAAACTATCATATGTTTTAAGTGATGTCAATGTTACGAATGGTAATGCTATA
GCTGGCTATAATTTCAATGGAATAAAAACGATTGAAACATATAGCAATAAAAATAATAAG
GTAGTAAACGTAGTACAAGAAGATGATGAGGTTGTGACTAAAGATTCAGATGTACAAAGA
GGTACGGTATTAGATGCTGATAAAGTAAAAGAGAAAAAGGTAGAATTGGTTTCTAAACAC
AGCACTAAAGTAGAAGATTTTGATTTTACTTCAAGATACAATACTAATTACAATGAAGTA
ACAGGTTACCAACAGTCGAGAGAACAAGTATATAAAAATATTGAAAAATTACTTCCTTTC
TATAACAGAGAAACAATAGTTAAGTATGGTAATTTAGTAGAGGATAACAGTGACTTATTT
ACTAAAAAACTTCTATCAGTTGTTCCTATGAAGAACAATGAAGTAATAACTGATATTAAT
AAAAATAAACAAGAAATAAACAAATTGTTATTACATTTTGAAGGTAACAAATCACGAGTA
TTAAATATTGCATATAAGAATGATTTCTCTAAAGTTGCTGAGTATGATATAGCTAATACA
AAATTAATGTATACACCTAATACAATGCTGCATGATTATAATAATATTGTAAAAACTATT
TTAAATGATCTGAAATCTGTTCAATATAGTTCAGCTGACGTTAGAAAAGTATTAGATATT
TCTGGTAATATAAAATTAACAGAGTTATATTTAGGTGAACAATTTGAAAAAACAAAAGCA
AATATAGAAGACAGTTTATCAAAACTACTTACTGCAGATGCTGCAATAGTGGAAAATAAC
AATAAGGTAATAGATAATTATGTAATTGAGAAAATAAAAAATAATAAGGAAGCCTTATTG
TTAGGATTAACGTATTTAGAACGCTGGTATAATTTTAATTATGGAGAAACCAATGCTAAA
GATTTAATAATGTACCACTTGGATTTCTTTGGTAAATCAAATAGTTCTGCATTAGATAAT
GTTATTGAGTTAGGTAAATCTGGATTTAACAATTTATTAGCAAAAAATAATGTAATTACT
TATAATGTATTATTAGCGAAAAATTATGGAACTGAAAGTTTATTTAAAGCATTAGAAGGA
TATAGAAAAGTATTCTTACCAACAATTTCTAACAATGAGTGGTTTAAAAAACAAACAAAA
GCATATATTGTAGAAGAAAAATCTACAATTGAAGAGGGAAGAGAAAAACAAGGAAAAGAG
GGAACTAAATATTCTATTGGGGTATATGATAGATTAACTAATCCATCTTGGAAATATCAA
AGTATGGTCTTACCACTATTAACTTTACCTGAAGAAAAAACAGTGTTTATGATAGCGAAT
ATTTCCACTATTGGATTTGGAGCCTATGACAGATATAGAAGTTCAGAATATCCTAAGGGA
GAAAAGTTAAACAAATTTGTAGAAGATAACGCCAAAGAAGCGGCTAAACGATTTAGAGAT
CATTATGATTATTGGTATAAGATATTAGATAACGATAATAAAGAAAAATTATATAGAAGT
ATTCTAGTATATGATGCTTTCAAATTTGGTACTGACAAAGATAAAGACAAAGTAACTCAT
CAAGCTACTTTTGAAACTGATCATCCAGCTATAAAATACTTCTTTGGACCTGCGGGAAAT
AATGTTGTTCATAATGGACACGGAGCATATGCTACCGGAGATGCATTCTATTATATGGCA
TATCGTATGTTGGATAAAGATGGAGCTGTAACATATACTCATGAAATGACACATAACTCA
GATAGAGAGATTTATCTTGGAGGATATGGAAGAAGAAGCGGATTAGGACCTGAGTTTTAT
GCAAAAGGATTATTACAAGCTCCGGATCATCCATATGATCCAACAATAACAATTAACTCT
GTCTTGAAATATGAGGATTCAGAAAATTCAACAAGACTTCAAGTAGCTGATCCAACTCAA
CGATTTAATAGTGCAGAAGACCTACATAATTATATGCATAATATGTTTGATGTAATTTAT
ATGTTAGAATATTTAGAAGGAAAAGCTGTAGCTAATTTAGAAACAAATCAAAAATATGAG
TTACTAAGAAAAATTGAAAATAAATTTGATCTTGATCAAGACGGTAATAATGTATACGCG
ACAAATGTTGTTCGCAGATTAACGATGGATGAAGTTAATAAATTAAATTCTTTTGATAGT
TTAATTGAAAATGATATTATTACTAGCAGAGGGTACAAAGACCAAGAATATAAGAGAAAT
GGTTATTATACAATTGATTTATTTTCACCGATTTATTCAGCTCTTAGTGGAGAGAAAGGG
ACTCCTGGTGATTTAATGGGACGCCGTATAGCATTCGAATTATTAGCTGCAAAAGGATAT
AAAGAGGGCATGGTACCTTATATCTCAAATCAATATGAAAAAGATGCAAAAGCGGCGGGA
AGTAAGATTAATTCTTATGGTAAAGAAGTAGGTTTAGTTACAGATGAATTAGTACTTGAA
AAAGTATTTAATGGTCAATATAAAACTTGGACACAATTCAAGAAGGATATGTATAAGGAA
AGAGAAAAACAATTCAGTAAACTAAATAGAGTTAACTTTATTAATCCTAATAATCCATTG
AGTCGTCAACGAAATGTATCGGTTACGGATATAGGTGTACTAGAGAGAATGATTGTCGAA
GCAGTGAGAGATGATGCGCAAGATGACGTAGCAAAATTTTACCCAGAAACAAATAGTAGA
GTTCTTAAACTGAAAAAAGCAATATATAAAGCTTATCTTGACCAAACAAATGATTTTAGA
AGTTCAATTTTTGAGAATAAAAAATAG
>vaccine3~~~iga_D39~~~45~~~[Streptococcus_pneumoniae D39]
ATGGAAAAGTATTTTGGTGAAAAACAAGAGCGTTTTTCATTTAGAAAATTATCAGTAGGA
CTTGTATCTGCAACGATTTCAAGTTTATTTTTTATGTCTGTATTAGCTAGTTCATCTGTG
GATGCTCAAGAAACTGCGGGAGTTCACTATAAATATGTGGCAGATTCAGAGCTATCATCA
GAAGAAAAGAAGCAGCTTGTCTATGATATTCCGACATACGTGGAGAATGATGATGAAACT
TATTATCTTGTTTATAAGTTAAATTCTCAAAATCAACTGGCGGAATTACCAAATACTGGA
AGCAAGAATGAGAGGCAAGCCCTAGTTGCTGGTGCTAGCTTAGCTGCTCTGGGAATTTTA
ATTTTTGCTGTTTCCAAGAAAAAGGTTAAGAATAAAACGGTATTACATTTAGTATTGGTT
GCGGGAATGGGAAATGGTGTCTTAGTTTCAGTCCATGCTTTAGAAAATCATCTTTTGCTA
AATTACAATACGGACTATGAATTGACCTCTGGAGAAAAATTACCTCTTCCTAAAGAGATT
TCAGGTTACACTTATATTGGATATATCAAAGAGGGAAAAACGACTTCTGATTTTGAAGTA
AGTAATCAAGAAAAATCAGCAGCCACTCCTACAAAACAACAAAAGGTGGATTATAATGTT
ACACCAAATTTTGTAGACCATCCATCAACAGTACAAGCTATTCAGGAACAAACACCTGTT
TCTTCAACTAAGCCGACAGAAGTTCAAGTAGTTGAAAAACCTTTCTCTACTGAATTAATC
AATCCAAGAAAAGAAGAGAAACAATCTTCAGATTCTCAAGAACAATTAGCCGAACATAAG
AATCTAGAAACGAAGAAAGAGGAGAAGATTTCTCCAAAAGAAAAGACTGGGGTAAATACA
TTAAATCCACAGGATGAAGTTTTATCAGGTCAATTGAACAAACCTGAACTCTTATATCGT
GAGGAAACTATAGAGACAAAAATAGATTTTCAAGAAGAAATTCAAGAAAATCCTGATTTA
GCTGAAGGAACTGTAAGAGTAAAACAAGAAGGTAAATTAGGTAAGAAAGTTGAAATCGTC
AGAATATTCTCTGTAAACAAGGAAGAAGTTTCGCGAGAAATTGTTTCAACTTCAACGACT
GCGCCTAGTCCAAGAATAGTCGAAAAAGGTACTAAAAAAACTCAAGTTATAAAGGAACAA
CCTGAGACTGGTGTAGAACATAAGGACGTACAGTCTGGAGCTATTGTTGAACCCGCAATT
CAGCCTGAGTTGCCCGAAGCTGTAGTAAGTGATAAAGGCGAACCAGAAGTTCAACCGACA
TTACCCGAAGCAGTTGTGACCGACAAAGGTGAGACTGAGGTTCAACCAGAGTCGCCAGAT
ACTGTGGTAAGTGATAAAGGTGAACCAGAGCAGGTAGCCCCATTGCCAGAATATAAGGGT
AATATTGAGCAAGTAAAACCTGAAACTCCGGTTGAGAAGACCAAAGAACAAGGTCCAGAA
AAAACTGAAGAAGTTCCAGTAAAACCAACAGAAGAAACACCAGTAAATCCAAATGAAGGT
ACTACAGAAGGAACCTCAATTCAAGAAGCAGAAAATCCAGTTCAACCTGCAGAAGAATCA
ACAACGAATTCAGAGAAAGTATCACCAGATACATCTAGCGAAAATACTGGGGAAGTGTCC
AGTAATCCTAGTGATTCGACAACCTCAGTTGGAGAATCAAATAAACCAGAACATAATGAC
TCTAAAAATGAAAATTCAGAAAAAACTGTAGAAGAAGTTCCAGTAAATCCAAATGAAGGC
ACAGTAGAAGGTACCTCAAATCAAGAAACAGAAAAACCAGTTCAACCTGCAGAAGAAACA
CAAACAAACTCTGGGAAAATAGCTAACGAAAATACTGGAGAAGTATCCAATAAACCTAGT
GATTCAAAACCACCAGTTGAAGAATCAAATCAACCAGAAAAAAACGGAACTGCAACAAAA
CCAGAAAATTCAGGTAATACAACATCAGAGAATGGACAAACAGAACCAGAGAAAAAACTC
GAATTAAGAAATGTTTCTGATATTGAGTTGTATAGTCAGACGAATGGAACCTACAGACAA
CATGTTTCATTGGATGGAATTCCAGAGAATACGGATACTTACTTTGTCAAGGTAAAATCT
TCAGCATTTAAAGATGTCTATATACCAGTAGCTTCAATAACCGAAGAGAAAAGAAATGGG
CAGTCAGTTTATAAAATCACAGCCAAAGCTGAGAAACTCCAGCAAGAACTAGAAAATAAA
TATGTCGACAATTTCACCTTCTACCTCGATAAGAAGGCTAAAGAGGAAAATACAAACTTT
ACTTCCTTTAGCAACCTGGTCAAAGCTATAAACCAAAATCCCTCTGGAACCTATCATTTA
GCGGCCAGCCTGAATGCTAACGAAGTGGAGCTTGGTCCTGATGAAAGATCCTATATCAAG
GACACCTTTACTGGTCGTTTAATCGGTGAAAAAGATGGCAAGAATTATGCTATCTATAAT
TTGAAAAAACCTCTGTTTGAAAACTTGAGTGGTGCTACAGTAGAAAAACTGAGTCTAAAA
AATGTTGCTATTTCAGGGAAAAATGATATTGGTTCACTGGCAAATGAAGCTACGAATGGC
ACAAAGATTAAACAAGTTCATGTTGATGGTGTTCTGGCTGGAGAACGTGGTGTCGGTGGT
TTGTTGGCTAAGGCAGACCAATCAAGCATCGCAGAGAGCAGTTTCAAGGGAAGAATTGTC
AATACCTATGAAACGACTGATGCCTACAATATTGGCGGTCTGGTCGGTCATTTAACAGGA
AAAAATGCGTCTATTGCTAAATCCAAAGCGACAGTAACCATTTCGTCAAACACCAATAGG
TCAGATCAGACTGTCGGTGGTCTTGCAGGTCTAGTAGACCAAGATGCGCATATACAGAAC
AGTTATGCGGAAGGTGATATTAATAATGTCAAGCACTTTGGTAAAGTCGCTGGTGTGGCA
GGATATTTGTGGGATCGAACTTCTGGTGAGGAAAAACACGCTGGTGAATTGACCAATGTT
CTTAGCGATGTCAATGTAACAAACGGAAATGCCATCACTGGATACCACTATACAGGAATG
AAGGTAGCTAATACATTTAGTAGTAAGGCTAATAGAGTTTTCAATGTCACTTTAGAGAAG
GATGAGGTCGTCAGCAAGGAATCCTTTGAAGAAAGAGGAACAATGCTAGATGCTTCTCAA
ATTGTAAGCAAAAAAGCAGAAATAAATCCTCTCACTCTACCAACGGTGGAACCCCTCTCA
ACAAGTGGCAAGAAAGACAGTGATTTTTCTAAGATAGCCCATTATCAAGCTAACCGTGCT
TTGGTTTATAAGAACATTGAAAAATTGTTACCTTTTTATAATAAGTCAACCATCGTCAAA
TACGGAAACCTGGTTAAGGAGAACAGTCTCTTATACCAAAAAGAACTCTTATCTGCAGTT
ATGATGAAGGATGACCAAGTAATCACAGATATTGTTTCCAACAAACAGACTGCAAACAAA
CTCTTACTTCACTATAATGACCATTCATCTGAGAAATTTGATCTCAAGTACCAGACTGAT
TTTGCCAATCTAGCAGAATATAATCTAGGTAATACGGGACTTCTCTACACTCCTAACCAA
TTCTTATATGATCGAGACTCTATTGTTAAGGAAGTCTTGCCTGAGTTGCAGAAGCTTGAT
TACCAGTCAGATGCTATCAGAAAGACACTTGGTATTTCTCCAGAAGTTAAGTTAACCGAG
CTCTATTTAGAAGACCAGTTCTCCAAAACAAAACAAAATCTGGGAGACAGCTTGAAAAAA
CTTTTGTCAGCAGATGCCGGTCTAGCTAGCGATAACTCAGTCACCAGAGGCTATCTTGTA
GATAAAATCAAGAATAATAAGGAAGCCTTGCTACTCGGTTTAACTTATTTAGAACGTTGG
TATAACTTTAACTATGGTCAAGTGAATGTCAAAGACCTAGTTATGTATCATCCAGACTTC
TTTGGTAAAGGAAATACTTCCCCACTAGATACTCTGATTGAGTTAGGTAAATCTGGCTTT
AACAATCTTCTAGCTAAGAATAATGTCGATACTTATGGTATCAGTCTTGCCAGTCAACAT
GGAGCGACAGATTTGTTTAGCACGCTGGAACATTACCGAAAAGTCTTTTTACCAAATACA
AGCAATAATGACTGGTTTAAATCAGAGACTAAGGCTTACATTGTCGAAGAAAAATCCACT
ATCGAAGAGGTGAAAACGAAGCAAGGGTTAGCTGGCACCAAGTATTCTATCGGTGTTTAT
GATCGTATCACGAGTGCCACATGGAAATACCGCAATATGGTCTTGCCTCTCCTGACCTTG
CCAGAGAGATCCGTATTTGTCATCTCGACCATGTCTAGTCTAGGATTTGGAGCTTATGAT
CGCTACCGCAGTAGTGACCATAAAGCGGGCAAGGCTCTCAATGATTTTGTTGAAGAAAAT
GCGCGTGAAACAGCCAAACGTCAGCGAGATCACTACGATTATTGGTATCGTATTTTAGAT
GAACAGTCACGCGAAAAACTCTATCGTACGATTCTCCTTTATGATGCCTATAAGTTTGGG
GATGACACAACATCAGGAAAAGCTACAGCGGAGGCTAAGTTTGATAGCTCCAATCCAGCT
ATGAAGAACTTCTTTGGACCAGTTGGCAATAAGGTAGTACACAACCAGCATGGAGCCTAC
GCTACAGGGGACGGCGTCTACTATATGTCTTACCGCATGCTGGACAAGGATGGAGCCATT
ACTTATACCCATGAAATGACCCATGATTCGGATCAGGATATTTACCTTGGTGGCTATGGT
CGAAGAAATGGCTTGGGACCAGAGTTCTTCGCAAAAGGCTTATTGCAAGCCCCTGACCAA
CCAAGTGACGCAACCATTACCATTAATTCTATCTTGAAACACTCAAAATCAGATAGTACA
GAGGGATCCCGTCTTCAAGTCTTGGATCCGACAGAGAGATTCCAAAACGCAGCAGATCTT
CAGAACTATGTCCATAACATGTTTGACCTTATCTACATGATGGAATATCTCGAAGGGCAG
TCAATCGTTAATAAACTAAGTGTTTACCAGAAAATGGCGGCTCTCAGAAAAATTGAGAAC
AAGTATGTGAAAGATCCAGCAGATGGAAATGAGGTTTATGCCACTAACGTAGTCAAAGAA
TTGACAGAAGCAGAGGCCCGAAACCTGAATAGTTTTGAAAGTTTGATTGACCACAACATC
TTATCAGCTCGTGAGTACCAGTCTGGCGACTATGAACGAAATGGCTACTATACCATCAAA
CTCTTTGCCCCAATCTATTCAGCTCTCAGCAGTGAGAAAGGCACACCAGGGGACCTTATG
GGACGTAGGATTGCGTACGAACTTTTGGCTGCCAAAGGCTTTAAGGATGGAATGGTACCT
TATATCTCAAACCAATACGAAGAAGATGCTAAACAACAAGGGCAAACTATCAATCTTTAT
GGTAAAGAACGGGGCTTGGTGACCGATGAGCTTGTTTTGAAAAAGGTATTTGACGGTAAG
TATAAAACTTGGGCAGAATTTAAGACAGCTATGTACCAAGAACGGGTGGATCAGTTTGGA
AACTTGAAGCAGGTGACCTTTAAAGATCCGACAAAACCATGGCCAAGCTATGGCACAAAG
ACTATCAATAATGTGGATGAATTGCAAGCCCTCATGGACCAAGCTGTTCTCAAGGATGCT
GAAGGTCCACGTTGGAGTAATTATGATCCAGAAATCGACAGTGCCGTTCATAAGTTGAAG
AGAGCAATCTTTAAAGCCTATCTTGACCAAACAAATGATTTTAGAAGTTCAATTTTTGAG
AATAAAAAATAG
>vaccine3~~~iga_Hungary19A_6~~~46~~~[Streptococcus_pneumoniae Hungary19A_6]
ATGGAAAAGTATTTTGGTGAAAAACAAGAGCGTTTTTCATTTAGAAAATTATCAGTAGGA
CTTGTATCTGCAACGATTTCAAGTTTATTTTTTATGTCTGTATTAGCTAGTTCATCTGTG
GATGCTCAAGAAACTGCGGGAGTTCACTATAAATATGTGGCAGATTCAGAGCTATCATCA
GAAGAAAAGAAGCAGCTTGTCTATGATATTCCGACATACGTGGAGAATGATGATGAAACT
TATTATCTTGTTTATAAGTTAAATTCTCAAAATCAACTGGCGGAATTACCAAATACTGGA
AGCAAGAATGAGAGGCAAGCCCTAGTTGCTGGTGCTAGCTTAGCTGCTCTGGGAATTTTA
ATTTTTGCTGTTTCCAAGAAAAAGGTTAAGAATAAAACGGTATTACATTTAGTATTGGTT
GCGGGAATAGGAAATGGTGTCTTAGTTTCAGTCCATGCTTTAGAAAATCATCTTTTGCTA
AATTACAATACGGACTATGAATTGACCTCTGGAGAAAAATTACCTCTTCCTAAAGAGATT
TCAGGTTACACTTATATTGGATATATCAAAGAGGGAAAAACGACTTCTGATTTTGAAGTA
AGTAATCAAGAAAAATCAGCAGCCACTCCTACAAAACAACAAAAGGTGGATTATAATGTT
ACACCAAATTTTGTAGACCATCCATCAACAGTACAAGCTATTCAGGAACAAACACCTGTT
TCTTCAACTAAGCCGACAGAAGTTCAAGTAGTTGAAAAACCTTTCTCTACTGAATTAATC
AATCCAAGAAAAGAAGAGAAACAATCTTCAGATTCTCAAGAACAATTAGCCGAACATAAG
AATCTAGAAACGAAGAAAGAGGAGAAGATTTCTCCAAAAGAAAAGACTGGGGTAAATACA
TTAAATCCACAGGATGAAGTTTTATCAGGTCAATTGAACAAACCTGAACTCTTATATCGT
GAGGAAACTATAGAGATAAAAATAGATTTTCAAGAAGAAATTCAAGAAAATCCTGATTTA
GTTGAAGGAATTGTAAGAGTAAAACAAGAAGGTAAATTAGGTAAGAAAGTTGAAATCGTC
AGAATATTCTCTGTAAACAAGGAAGAAGTTTCGCGAGAAATTGTTTCAACTTCAACGACT
GCGCCTATTCCAAGAATAGTCGAAAAAGGTACTAAAAAAACTCAAGTTATAAAGGAACAA
CCTGAGACTGGTGTAGAACATAAGGACGTACAGTCTGGAGCTATTGTTGAACCCGCAATT
CAGCCTGAGTTGCCCGAAGCTGTAGTAAGTGACAAAGGCGTACCAGAAGTTCAACCAGCG
TTGTCCAAAGCAGTTATAACCGACAAAGGTGAGACTGAGGTTCAACCAGAGTCGCCAGAT
ACTGTGGTAAGTGATAAAGGTGAACCAGCAGTCCAACCAGAGTCGCCAGATACTGTGGTA
AGTGATAAAGGTGAACCTAAACAGGTAGCACCGCTTCCAGAATATACAGGACCACAAGCC
AGCGCTATTGTTGAACCAGAGCAGGTAGCACCACTACCAGAATACACAGGGGTACAAGCC
GGAGCTATTGTTGAACCCGCAGTCCAGCCAGCGTTACCCGAAGCAGTTGTAAGCGATAAA
GGCGTACCAGAAGTTCAGCCTGAGTTGCCCGAAGCAGTAGTAAGTGATAAAGGCGTACCA
GAAGTTCAGCCTGAATTACCCGAAGCAGTTGTAAGTGATAAAGGTGAACCAGAGCAGGTA
GCACCATTGCCAGAATATAAGGGGAATATTGAGCAAGTAAAACCTGAAACTCCGGTTGAG
AAACTTCAAGAGGAAGAACCAGAGAAAACAATAGAACTAAGAAGTGTTTCTGATGTGGAA
CTCTATAGTTATGAAGCTAATCAATCAAAACAACATACAATCTTAGATAAAGTACCAGAT
AATAAATCTGCTTATTTCATCAAAGTGAAGTCAGCTAAATTTAAAGATGTACTGCTCCCA
GTTTCAAACATTGAGGACACTACAAAAGACGGTAAAGTAGTCTATAAAATTACAGCTAGA
TTGGAACACTTAAAACAATCTGTAGACAATCAATACCAAGATAATTTTACTTATTATCTT
CCAAAAGTTGTTCAAAACGATGGCCCTATCTACACATCATTTAAAAAATTAGTAACTGAT
ATGAATAGTAGACCTGATGGAACATTTATACTTGGCGCGACCATGAATGCTCGTGAGTTT
GAGTTGGGTGAAAATCAAGAAAGTTATGTTACAAAGAATTTCACAGGGACATTAATTGGT
AGTCATCAAGGTAAACATTATGCTATCTATAATTTGAAAAAGCCATTATTCAATACATTA
AATAATGCTGCTATTCAGGATCTCACCTTGAAAGATGTCAATATTTCTGGTAAGAATCAT
GTCGCATCAGTTGCTATGGAAGCCACAAATTCTTCAACTTTAGATAACGTTCACGCAAAT
GGAATCATTGCTGGTGAACTAGGTATCGGAGGACTTGTCCAAAAAGTTGATAATTCTACA
GTAAGAAATAGTAGCTTCACCGGAAGAATAACAAATACTTTTGTTACAACTTCTCAGTAT
GCAATTGGTGGTCTAGTCGGTCAATTAACCGGTGCTAATGCTAGGGTAGCTCATTCTATT
TCAACAGTAGTCATTTCAAGTAATGGAGAACATTCTAATCAAACAATTGGTGGTATTGTT
GGTATTGTAGAAAATAATGCGACTGTAGAAAATAGTTATGCTGAAGGTGAAATAAATAAT
GCTAAACCATTCGCTAGAGTTGGTGGAGTTGCAGGTTCCCTATGGACACAAGAAGGCGGA
ACAGATAACAATACTGGTCGCTTGACAAATGTTCTCAGCGATATGAATATTACAAATGGG
AATGCGATTTCTGGTTACCACTTCAATGGTATAAAGGAAACAAATGTCTATAGTAATAAA
GAAAACAAAGTAGTCAACGTTCAAGCAGTTGGAGATGAGGTAATGTCAGTTGATTCCACT
GTAGAACGTGGTACTGAGATTGAAAAAACATCAGTTCAAGCTAAGAAAGATGAGATTACT
AAAAAACACACTATCACAGTGGAAGATTTCACAAATTCTGTTAAACAGGATGTAGATTAT
ACCAAGGCAGCACATTATCAATCAACAAGAGAAGTTGCATATAAAAATATAGAAAAATTA
TTACCTTTCTATAATAGAGATACTATTGTGAAATATGGAAATCAATTATCTACTGATCAT
AACCTGTTTAAGAAAGAATTGTTGTCTGTTGTAGCTATGAAAAATGATGAAGTAGTCTCA
GATATCACTTCAAACAAGAACTCTATCAATCACTTACTACTACATTACAAAGACGGAACA
TCTGAGAAAGTAGATTTAACCTACAATAGTGACTTTGCAAATCTGGCTGAGTATAATATT
GAAAATACTGGTCTAGTATACACACCAAATGCTTTCCTAAAAAATTATACGCCTATAATA
GACAGAGTTAAAAATGATTTAACTGCAGTACCGTATAATCCAACTGCTCTTAAGAATTTG
TTAGGAATCTCTGATAATGTTAAATTAACAGAACTTTATCTAGATGAGCAATTCACTAAG
ACCAAAGAGCACTTAACTGAAACTCTTAAAAAATTACTTTCAGCTGATGCTGCTGTTTCT
GGAAATAATGATATAATTGACAATTACATTGTTGATAAAATCAAGCGAAACAAAGAAGCC
TTGATGCTAGGATTAACCTATCTAGAACGCTGGTATGATTTCAAATTCGATAAGGCTAGC
GCAAAAGATTTGCTTATGTTCCATATGGATTTCTTTGGTAAGGGAAATACCTCTCCGCTA
GATGCAATTATCGAATTAGGTAAATCTGGCTACAACAATCTCTTGGCCAAAAATAATGTG
GTTACTTACAATGCCTTGTTAACGAATAACTACGGTACAAAAGATCTGTTTAGTGCTTTA
GAAGGCTACCGTAAAGCATTTGCACCGCATCAAACTAACAATGAATGGTTTAAATCACAG
ACTAAGGCTTACATTGTCGAAGAAAAATCCAATATCGAAGAGGTGAAAACGAAGCAAGGA
CTAGTTGGCACTAAGTATTCTATTGGTGTCTATGACCGTATCACTAGTGCCACATGGAAA
TACCGCAATATGGTCTTGCCGCTCCTAACCTTGCCGGAGAAATCAGTCTTTGTCATCTCG
ACCATCTCTAGTCTAGGATTTGGAGCTTATGATCGTTACCGCAATAGTGAGCACAAAGCA
GGCAAGGACCTCAATGATTTTGTTGAAGAAAATGCACGTGAAACAGCCAAACATCAGCGA
GATCACTACGATTATTGGTATCGTATTTTAGACGACAATGCACGTGAAAAACTTTATAGA
AATATTTTGCTTTACGATGCTTATAAATTTGGCGATGATAATACCGTAGGGAAAGCTACA
GAAGTGGCAGATTTTGATAATCCAAATCCTGCAATGCAACATTTCTTTGGACCTGTTGGA
AATAAAGTTGGGCATAATCAACACGGTGCTTATGCTACAGGTGATGCAGTTTATTATATG
GGTTATCGAATGTTGGATAAGGATGGAGCTATTACTTATACGCATGAGATGACACATGAC
TCAGATCAGGACATTTATCTTGGAGGATATGGTCGAAGAAGTGGCTTGGGACCAGAGTTC
TTTGCTAAAGGATTATTACAAGCACCAGACCATCCAGATGATGCGACCATTACCATCAAC
TCCATCTTGAAACATTCGAAATCTGATAGTACAGAAAGTCGACGATTACAAGTACTTGAT
CCAACTACAAGATTTAATAATGCAGATGATTTGAAGCAATATGTCCACAACATGTTTGAC
GTTGTTTATATGTTGGAATATCTCGAAGGAAATTCAATTCTTAAATTGGATACGAATCAA
AAACAACAACTTCTTAGAAAAGTTACAAATGAGTACCATCCTGATCCTGATGGAAATAAG
GTCTATGCAACAAATGTTGTCAGAAATATAACAGTAGAAGAAGTTGAAAGACTACGTTCA
TTCAATGATTTGATTGATAATAATATTCTTTCGTCTAGGGAATATGCCTCAGGTAAATAC
GAAAGAAATGGCTATTTCACTATTAAATTATTTGCGCCGATTTATGCAGCATTAAGTAAT
GATGACGGAACGCCAGGTGATCTGATGGGACGTCGTATGGCCTATGAACTATTAGCTGCA
AAAGGCTTTAAAGATGGTATGGTGCCATATATCTCAAATCAATTTGAAGCAGATGCTAGG
GCAAATAATAAAACGATTACCTCATATGGTAAGACCAAAGGATTAGTAACAGATACATTA
GTTCTTCAAAGATTATTTAATGGACAATACAATACCTGGAGTGATTTTAAGAAAGCTATG
TATAAAGAACGTCAGGATAAATTCAATAAATTGAACAAAATTTCATTTAAAGATCCGTCT
CAACCTTGGACGCGCAATATTATTAAGACAATTCACAGTGTAAATGAACTGCAGAACTTA
ATGAATGAAGCTGTCCGCAAGGATACAGAAACTCCTCATTGGTATAACTATAATCCAGAA
ATAGACAGTGCAGTTCATAAGTTGAAGAGAGCAATCTTTAAAGCCTATCTTGACCAAACA
AATGATTTTAGAAGTTCAATTTTTGAGAATAAAAAATAG
>vaccine3~~~iga_R6~~~47~~~[Streptococcus_pneumoniae R6]
ATGGAAAAGTATTTTGGTGAAAAACAAGAGCGTTTTTCATTTAGAAAATTATCAGTAGGA
CTTGTATCTGCAACGATTTCAAGTTTATTTTTTATGTCTGTATTAGCTAGTTCATCTGTG
GATGCTCAAGAAACTGCGGGAGTTCACTATAAATATGTGGCAGATTCAGAGCTATCATCA
GAAGAAAAGAAGCAGCTTGTCTATGATATTCCGACATACGTGGAGAATGATGATGAAACT
TATTATCTTGTTTATAAGTTAAATTCTCAAAATCAACTGGCGGAATTACCAAATACTGGA
AGCAAGAATGAGAGGCAAGCCCTAGTTGCTGGTGCTAGCTTAGCTGCTCTGGGAATTTTA
ATTTTTGCTGTTTCCAAGAAAAAGGTTAAGAATAAAACGGTATTACATTTAGTATTGGTT
GCGGGAATGGGAAATGGTGTCTTAGTTTCAGTCCATGCTTTAGAAAATCATCTTTTGCTA
AATTACAATACGGACTATGAATTGACCTCTGGAGAAAAATTACCTCTTCCTAAAGAGATT
TCAGGTTACACTTATATTGGATATATCAAAGAGGGAAAAACGACTTCTGATTTTGAAGTA
AGTAATCAAGAAAAATCAGCAGCCACTCCTACAAAACAACAAAAGGTGGATTATAATGTT
ACACCAAATTTTGTAGACCATCCATCAACAGTACAAGCTATTCAGGAACAAACACCTGTT
TCTTCAACTAAGCCGACAGAAGTTCAAGTAGTTGAAAAACCTTTCTCTACTGAATTAATC
AATCCAAGAAAAGAAGAGAAACAATCTTCAGATTCTCAAGAACAATTAGCCGAACATAAG
AATCTAGAAACGAAGAAAGAGGAGAAGATTTCTCCAAAAGAAAAGACTGGGGTAAATACA
TTAAATCCACAGGATGAAGTTTTATCAGGTCAATTGAACAAACCTGAACTCTTATATCGT
GAGGAAACTATAGAGACAAAAATAGATTTTCAAGAAGAAATTCAAGAAAATCCTGATTTA
GCTGAAGGAACTGTAAGAGTAAAACAAGAAGGTAAATTAGGTAAGAAAGTTGAAATCGTC
AGAATATTCTCTGTAAACAAGGAAGAAGTTTCGCGAGAAATTGTTTCAACTTCAACGACT
GCGCCTAGTCCAAGAATAGTCGAAAAAGGTACTAAAAAAACTCAAGTTATAAAGGAACAA
CCTGAGACTGGTGTAGAACATAAGGACGTACAGTCTGGAGCTATTGTTGAACCCGCAATT
CAGCCTGAGTTGCCCGAAGCTGTAGTAAGTGATAAAGGCGAACCAGAAGTTCAACCGACA
TTACCCGAAGCAGTTGTGACCGACAAAGGTGAGACTGAGGTTCAACCAGAGTCGCCAGAT
ACTGTGGTAAGTGATAAAGGTGAACCAGAGCAGGTAGCCCCATTGCCAGAATATAAGGGT
AATATTGAGCAAGTAAAACCTGAAACTCCGGTTGAGAAGACCAAAGAACAAGGTCCAGAA
AAAACTGAAGAAGTTCCAGTAAAACCAACAGAAGAAACACCAGTAAATCCAAATGAAGGT
ACTACAGAAGGAACCTCAATTCAAGAAGCAGAAAATCCAGTTCAACCTGCAGAAGAATCA
ACAACGAATTCAGAGAAAGTATCACCAGATACATCTAGCGAAAATACTGGGGAAGTGTCC
AGTAATCCTAGTGATTCGACAACCTCAGTTGGAGAATCAAATAAACCAGAACATAATGAC
TCTAAAAATGAAAATTCAGAAAAAACTGTAGAAGAAGTTCCAGTAAATCCAAATGAAGGC
ACAGTAGAAGGTACCTCAAATCAAGAAACAGAAAAACCAGTTCAACCTGCAGAAGAAACA
CAAACAAACTCTGGGAAAATAGCTAACGAAAATACTGGAGAAGTATCCAATAAACCTAGT
GATTCAAAACCACCAGTTGAAGAATCAAATCAACCAGAAAAAAACGGAACTGCAACAAAA
CCAGAAAATTCAGGTAATACAACATCAGAGAATGGACAAACAGAACCAGAGAAAAAACTC
GAATTAAGAAATGTTTCTGATATTGAGTTGTATAGTCAGACGAATGGAACCTACAGACAA
CATGTTTCATTGGATGGAATTCCAGAGAATACGGATACTTACTTTGTCAAGGTAAAATCT
TCAGCATTTAAAGATGTCTATATACCAGTAGCTTCAATAACCGAAGAGAAAAGAAATGGG
CAGTCAGTTTATAAAATCACAGCCAAAGCTGAGAAACTCCAGCAAGAACTAGAAAATAAA
TATGTCGACAATTTCACCTTCTACCTCGATAAGAAGGCTAAAGAGGAAAATACAAACTTT
ACTTCCTTTAGCAACCTGGTCAAAGCTATAAACCAAAATCCCTCTGGAACCTATCATTTA
GCGGCCAGCCTGAATGCTAACGAAGTGGAGCTTGGTCCTGATGAAAGATCCTATATCAAG
GACACCTTTACTGGTCGTTTAATCGGTGAAAAAGATGGCAAGAATTATGCTATCTATAAT
TTGAAAAAACCTCTGTTTGAAAACTTGAGTGGTGCTACAGTAGAAAAACTGAGTCTAAAA
AATGTTGCTATTTCAGGGAAAAATGATATTGGTTCACTGGCAAATGAAGCTACGAATGGC
ACAAAGATTAAACAAGTTCATGTTGATGGTGTTCTGGCTGGAGAACGTGGTGTCGGTGGT
TTGTTGGCTAAGGCAGACCAATCAAGCATCGCAGAGAGCAGTTTCAAGGGAAGAATTGTC
AATACCTATGAAACGACTGATGCCTACAATATTGGCGGTCTGGTCGGTCATTTAACAGGA
AAAAATGCGTCTATTGCTAAATCCAAAGCGACAGTAACCATTTCGTCAAACACCAATAGG
TCAGATCAGACTGTCGGTGGTCTTGCAGGTCTAGTAGACCAAGATGCGCATATACAGAAC
AGTTATGCGGAAGGTGATATTAATAATGTCAAGCACTTTGGTAAAGTCGCTGGTGTGGCA
GGATATTTGTGGGATCGAACTTCTGGTGAGGAAAAACACGCTGGTGAATTGACCAATGTT
CTTAGCGATGTCAATGTAACAAACGGAAATGCCATCACTGGATACCACTATACAGGAATG
AAGGTAGCTAATACATTTAGTAGTAAGGCTAATAGAGTTTTCAATGTCACTTTAGAGAAG
GATGAGGTCGTCAGCAAGGAATCCTTTGAAGAAAGAGGAACAATGCTAGATGCTTCTCAA
ATTGTAAGCAAAAAAGCAGAAATAAATCCTCTCACTCTACCAACGGTGGAACCCCTCTCA
ACAAGTGGCAAGAAAGACAGTGATTTTTCTAAGATAGCCCATTATCAAGCTAACCGTGCT
TTGGTTTATAAGAACATTGAAAAATTGTTACCTTTTTATAATAAGTCAACCATCGTCAAA
TACGGAAACCTGGTTAAGGAGAACAGTCTCTTATACCAAAAAGAACTCTTATCTGCAGTT
ATGATGAAGGATGACCAAGTAATCACAGATATTGTTTCCAACAAACAGACTGCAAACAAA
CTCTTACTTCACTATAATGACCATTCATCTGAGAAATTTGATCTCAAGTACCAGACTGAT
TTTGCCAATCTAGCAGAATATAATCTAGGTAATACGGGACTTCTCTACACTCCTAACCAA
TTCTTATATGATCGAGACTCTATTGTTAAGGAAGTCTTGCCTGAGTTGCAGAAGCTTGAT
TACCAGTCAGATGCTATCAGAAAGACACTTGGTATTTCTCCAGAAGTTAAGTTAACCGAG
CTCTATTTAGAAGACCAGTTCTCCAAAACAAAACAAAATCTGGGAGACAGCTTGAAAAAA
CTTTTGTCAGCAGATGCCGGTCTAGCTAGCGATAACTCAGTCACCAGAGGCTATCTTGTA
GATAAAATCAAGAATAATAAGGAAGCCTTGCTACTCGGTTTAACTTATTTAGAACGTTGG
TATAACTTTAACTATGGTCAAGTGAATGTCAAAGACCTAGTTATGTATCATCCAGACTTC
TTTGGTAAAGGAAATACTTCCCCACTAGATACTCTGATTGAGTTAGGTAAATCTGGCTTT
AACAATCTTCTAGCTAAGAATAATGTCGATACTTATGGTATCAGTCTTGCCAGTCAACAT
GGAGCGACAGATTTGTTTAGCACGCTGGAACATTACCGAAAAGTCTTTTTACCAAATACA
AGCAATAATGACTGGTTTAAATCAGAGACTAAGGCTTACATTGTCGAAGAAAAATCCACT
ATCGAAGAGGTGAAAACGAAGCAAGGGTTAGCTGGCACCAAGTATTCTATCGGTGTTTAT
GATCGTATCACGAGTGCCACATGGAAATACCGCAATATGGTCTTGCCTCTCCTGACCTTG
CCAGAGAGATCCGTATTTGTCATCTCGACCATGTCTAGTCTAGGATTTGGAGCTTATGAT
CGCTACCGCAGTAGTGACCATAAAGCGGGCAAGGCTCTCAATGATTTTGTTGAAGAAAAT
GCGCGTGAAACAGCCAAACGTCAGCGAGATCACTACGATTATTGGTATCGTATTTTAGAT
GAACAGTCACGCGAAAAACTCTATCGTACGATTCTCCTTTATGATGCCTATAAGTTTGGG
GATGACACAACATCAGGAAAAGCTACAGCGGAGGCTAAGTTTGATAGCTCCAATCCAGCT
ATGAAGAACTTCTTTGGACCAGTTGGCAATAAGGTAGTACACAACCAGCATGGAGCCTAC
GCTACAGGGGACGGCGTCTACTATATGTCTTACCGCATGCTGGACAAGGATGGAGCCATT
ACTTATACCCATGAAATGACCCATGATTCGGATCAGGATATTTACCTTGGTGGCTATGGT
CGAAGAAATGGCTTGGGACCAGAGTTCTTCGCAAAAGGCTTATTGCAAGCCCCTGACCAA
CCAAGTGACGCAACCATTACCATTAATTCTATCTTGAAACACTCAAAATCAGATAGTACA
GAGGGATCCCGTCTTCAAGTCTTGGATCCGACAGAGAGATTCCAAAACGCAGCAGATCTT
CAGAACTATGTCCATAACATGTTTGACCTTATCTACATGATGGAATATCTCGAAGGGCAG
TCAATCGTTAATAAACTAAGTGTTTACCAGAAAATGGCGGCTCTCAGAAAAATTGAGAAC
AAGTATGTGAAAGATCCAGCAGATGGAAATGAGGTTTATGCCACTAACGTAGTCAAAGAA
TTGACAGAAGCAGAGGCCCGAAACCTGAATAGTTTTGAAAGTTTGATTGACCACAACATC
TTATCAGCTCGTGAGTACCAGTCTGGCGACTATGAACGAAATGGCTACTATACCATCAAA
CTCTTTGCCCCAATCTATTCAGCTCTCAGCAGTGAGAAAGGCACACCAGGGGACCTTATG
GGACGTAGGATTGCGTACGAACTTTTGGCTGCCAAAGGCTTTAAGGATGGAATGGTACCT
TATATCTCAAACCAATACGAAGAAGATGCTAAACAACAAGGGCAAACTATCAATCTTTAT
GGTAAAGAACGGGGCTTGGTGACCGATGAGCTTGTTTTGAAAAAGGTATTTGACGGTAAG
TATAAAACTTGGGCAGAATTTAAGACAGCTATGTACCAAGAACGGGTGGATCAGTTTGGA
AACTTGAAGCAGGTGACCTTTAAAGATCCGACAAAACCATGGCCAAGCTATGGCACAAAG
ACTATCAATAATGTGGATGAATTGCAAGCCCTCATGGACCAAGCTGTTCTCAAGGATGCT
GAAGGTCCACGTTGGAGTAATTATGATCCAGAAATCGACAGTGCCGTTCATAAGTTGAAG
AGAGCAATCTTTAAAGCCTATCTTGACCAAACAAATGATTTTAGAAGTTCAATTTTTGAG
AATAAAAAATAG
>vaccine3~~~iga_TIGR4~~~48~~~[Streptococcus_pneumoniae TIGR4]
ATGGAAAAGTATTTTGGTGAAAAACAAGAGCGTTTTTCATTTAGAAAATTATCAGTAGGA
CTTGTATCTGCAACGATTTCAAGTTTATTTTTTATGTCTGTATTAGCTAGTTCATCTGTG
GATGCTCAAGAAACTGCGGGAGTTCACTATAAATATGTGGCAGATTCAGAGCTATCATCA
GAAGAAAAGAAGCAGCTTGTCTATGATATTCCGACATACGTGGAGAATGATGATGAAACT
TATTATCTTGTTTATAAGTTAAATTCTCAAAATCAACTGGCGGAATTGCCAAATACTGGA
AGCAAGAATGAGAGGCAAGCCCTAGTTGCTGGTGCTAGCTTAGCTGCTATGGGAATTTTA
ATTTTTGCTGTTTCCAAGAAAAAGGTTAAGAATAAAACGGTATTACATTTAGTATTGGTT
GCAGGGATAGGAAATGGTGTCTTAGTTTCAGTCCATGCTTTAGAAAATCATCTTTTGCTA
AATTACAATACGGACTATGAATTGACCTCTGGAGAAAAATTACCTCTTCCTAAAGAGATT
TCAGGTTACACTTATATTGGATATATCAAAGAGGGAAAAACGACTTCTGAGTCTGAAGTA
AGTAATCAAAAGAGTTCAGTTGCCACTCCTACAAAACAACAAAAGGTGGATTATAATGTT
ACACCGAATTTTGTAGACCATCCATCAACAGTACAAGCTATTCAGGAACAAACACCTGTT
TCTTCAACTAAGCCGACAGAAGTTCAAGTAGTTGAAAAACCTTTCTCTACTGAATTAATC
AATCCAAGAAAAGAAGAGAAACAATCTTCAGATTCTCAAGAACAATTAGCCGAACATAAG
AATCTAGAAACGAAGAAAGAGGAGAAGATTTCTCCAAAAGAAAAGACTGGGGTAAATACA
TTAAATCCACAGGATGAAGTTTTATCAGGTCAATTGAACAAACCTGAACTCTTATATCGT
GAGGAAACTATGGAGACAAAAATAGATTTTCAAGAAGAAATTCAAGAAAATCCTGATTTA
GCTGAAGGAACTGTAAGAGTAAAACAAGAAGGTAAATTAGGTAAGAAAGTTGAAATCGTC
AGAATATTCTCTGTAAACAAGGAAGAAGTTTCGCGAGAAATTGTTTCAACTTCAACGACT
GCGCCTAGTCCAAGAATAGTCGAAAAAGGTACTAAAAAAACTCAAGTTATAAAGGAACAA
CCTGAGACTGGTGTAGAACATAAGGACGTACAGTCTGGAGCTATTGTTGAACCCGCAATT
CAGCCTGAGTTGCCCGAAGCTGTAGTAAGTGACAAAGGCGAACCAGAAGTTCAACCTACA
TTACCCGAAGCAGTTGTGACCGACAAAGGTGAGACTGAGGTTCAACCAGAGTCGCCAGAT
ACTGTGGTAAGTGATAAAGGTGAACCAGAGCAGGTAGCACCGCTTCCAGAATATAAGGGT
AATATTGAGCAAGTAAAACCTGAAACTCCGGTTGAGAAGACCAAAGAACAAGGTCCAGAA
AAAACTGAAGAAGTTCCAGTAAAACCAACAGAAGAAACACCAGTAAATCCAAATGAAGGT
ACTACAGAAGGAACCTCAATTCAAGAAGCAGAAAATCCAGTTCAACCTGCAGAAGAATCA
ACAACGAATTCAGAGAAAGTATCACCAGATACATCTAGCAAAAATACTGGGGAAGTGTCC
AGTAATCCTAGTGATTCGACAACCTCAGTTGGAGAATCAAATAAACCAGAACATAATGAC
TCTAAAAATGAAAATTCAGAAAAAACTGTAGAAGAAGTTCCAGTAAATCCAAATGAAGGC
ACAGTAGAAGGTACCTCAAATCAAGAAACAGAAAAACCAGTTCAACCTGCAGAAGAAACA
CAAACAAACTCTGGGAAAATAGCTAACGAAAATACTGGAGAAGTATCCAATAAACCTAGT
GATTCAAAACCACCAGTTGAAGAATCAAATCAACCAGAAAAAAACGGAACTGCAACAAAA
CCAGAAAATTCAGGTAATACAACATCAGAGAATGGACAAACAGAACCAGAACCATCAAAC
GGAAATTCAACTGAGGATGTTTCAACCGAATCAAACACATCCAATTCAAATGGAAACGAA
GAAATTAAACAAGAAAATGAACTAGACCCTGATAAAAAGGTAGAAGAACCAGAGAAAACA
CTTGAATTAAGAAATGTTTCCGACCTAGAGTTATACAGTTTGTCAAATGGTACTTATAAA
CAACACATTTCGTTAGAGCAAGTTCCAAGCAATCCAAATAGCTACTTTGTTAAAGTGAAA
TCTTCTTCATTCAAAGATGTATACCTACCAGTAGCATCAATATCAGAGGAAAGAAAAAAT
GATAAAATCCTTTATAAAATCACAGCAAAAGTAGAGAAGCTTCAGCAGGAGATAGAAAGC
AGATATAAAGATAATTTTACCTTCTATCTAGCTAAGAAGGGAACAGAAGAAACAACAAAC
TTTACTTCCTTTAGTAATCTGGTCAAAGCTATAAACCAAAATCCCTCTGGAACCTATCAT
TTAGCGGCCAGCCTGAATGCTAACGAAGTGGAGCTTGGTCCTGATGAAAGATCCTATATC
AAGGACACCTTTACTGGTCGTTTAATCGGTGAAAAAGATGGCAAGAATTATGCTATCTAT
AATTTGAAAAAACCTCTGTTTGAAAACTTGAGTGGTGCTACAGTAGAAAAACTGAGTCTA
AAAAATGTTGCTATTTCAGGGAAAGATGATATCGGTTCACTGGCAAATGAAGCTCAGAAT
AACACAAAAATTAAGCAAGTTCACGTCGATGGTGTTCTGGCTGGTGAACGTGGTATCGGT
GGTTTGCTGGCTAAGGCTGAGCAATCAAGCATCACAGAGAGCAGTTTCAAGGGAAGAATT
ATCAACACTTATGAAACGACTGCTGCCTACAATATCGGTGGTATGGTCGGTCATTTGACA
GGTGACAAGGCTTTACTTACTAAGTCAAAAGCGACAGTAGCCATTTCATCTAACACAAAT
ACTTCAGATCAGACTGTGGGTGGACTTGCAGGCCTAGTAGACCGAGATGCACAGATCCAA
GATAGCTATGCTGAAGGTGATATCAACAATGTCAAGCACTTTGGTAGAGTCGCTGGAGTG
GCAGGCAATTTGTGGGATCGAACTTCTGGTGATGTTAGGCATGCTGGAAGTTTGACCAAT
GTTCTCAGCGATGTTAATGTAACCAACGGAAATGCCATCACTGGTTACCACTATAACGAA
ATGAAGGTAAAGGACACATTCAGCAGCAAGGCCAACAGAGTCTACAATGTCACCTTGGTC
AAGGATGAGGTCGTCAGCAAGGAATCCTTTGAAGAAAGAGGAACAATGCTAGATGCTTCT
CAAATTGCAAGCAAAAAAGCAGAAATCAATCCTCTCATTTTACCAACAGTGGAGCCACTT
TCAACAAGTGGCAAAAAAGACAGTGATTTTTCTAAGGTGGCCTATTATCAAGCTAAGCGC
AACTTGACTTATAAAAACATTGAAAAATTGCTACCTTTCTACAACAAGGCAACCATCGTC
AAATACGGAAACCTGGTCAATGAGAACAGTCTTTTATATCAAAAAGAACTCTTGTCAGCA
GTCATGATGAAGGACAACCAAGTCATCACAGACATTGTTTCTAACAAACAGACTGCAAAC
AAACTCTTGCTTCACTACAAGGATGATTTATCTGAGAAGCTGGATCTCAAATACCAGAAT
GATTTCGCCAAATTAGCAGAATATAGTCTGGGCAATACTGGACTTCTCTATACGCCAAAC
CAATTCCTGTATGACCAAACCTCTATCATCAAGCAAGTCTTACCTGACTTACAAAAGGTT
GACTATCATTCAGAAGCCATCAGAAAGACGCTGGGTATTTCTCCAAACGTCAAGCAAACT
GAGCTCTATCTAGAAGACCAGTTCGCCAAAACAAAACAACAACTGGAAGACAGTTTGAAA
AAACTCTTGTCAGCGGATGCTGGACTGGCTAGTGCTAACCCCGTCACTGAAGGTTATCTT
GTAGATAAAATCAAACGCAACAAGGAAGCCTTGCTACTTGGCTTGACCTATCTGGAACGG
TGGTATAACTTTAGCTATGGTCAGGTGAATGTCAAAGACCTAGTTCTGTACCATTTGGAC
TTCTTTGGTAAGGGGAATGCTTCACCATTAGATACTCTGATTGAGTTGGGTAAATCTGGC
TTTAACAATCTTCTAGCTAAGAATAATGTCGATACTTATGGTATCAGTCTTGCCAGTCAA
CATGGAACGACAGATTTGTTTAGCACGCTGGAACATTACCGAAAAGTCTTTTTACCAAAT
ACAAGCAATAATGACTGGTTTAAATCAGAGACTAAGGCTTACATTGTCGAAGAAAAATCC
ACTATCGAAGAGGTGAAAACGAAGCAAGGGTTAGCTGGCACCAAGTATTCTATCGGTGTT
TATGATCGTATCACGAGTGCCACATGGAAATACCGCAATATGGTCTTGCCTCTCCTGACC
TTGCCAGAGAGATCCGTATTTGTCATCTCGACCATGTCTAGTCTAGGATTTGGAGCTTAT
GATCGCTACCGCAGTAGTGACCATAAAGCGGGCAAGGCTCTCAATGATTTTGTTGAAGAA
AATGCGCGTGAAACAGCCAAACGTCAGCGAGATCACTACGATTATTGGTATCGTATTTTA
GACGACAATGCACGTGAAAAACTTTATAGAAATATTTTGCTTTACGATGCTTATAAATTT
GGCGATGATAATACCGTAGGGAAAGCTACAGAAGTGGCAGATTTTGATAATCCAAATCCT
GCAATGCAACATTTCTTTGGACCTGTTGGAAATAAAGTTGGGCATAATCAACACGGTGCT
TATGCTACAGGTGATGCAGTTTATTATATGGGTTATCGAATGTTGGATAAGGATGGAGCT
ATTACTTATACGCATGAGATGACACATGACTCAGATCAGGACATTTATCTTGGAGGATAT
GGTCGAAGAAGTGGCTTGGGACCAGAGTTCTTTGCTAAAGGATTATTACAAGCACCAGAC
CATCCAGATGATGCGACCATTACCATCAACTCCATCTTGAAACATTCAAAATCTGATAGT
ACAGAAAGTCGACGATTACAAGTACTTGATCCAACTACAAGATTTAATAATGCAGATGAT
TTGAAGCAATATGTCCACAACATGTTTGACGTTGTTTATATGTTGGAATATCTCGAAGGA
AATTCAATTCTTAAATTGGATACGAATCAAAAACAACAACTTCTTAGAAAAGTTACAAAT
GAGTACCATCCTGATCCTGATGGAAATAAGGTCTATGCAACAAATGTTGTCAGAAATCTA
ACAGTAGAAGAAGTTGAAAGACTACGTTCATTCAATGATTTGATTGATAATAATATTCTT
TCGTCTAGGGAATATGCCTCAGGTAAATACGAAAGAAATGGCTACTTCACTATTAAGTTA
TTTGCACCGATTTATGCTGCATTAAGTAATGATATAGGAACACCAGGTGACCTGATGGGA
CGTCGTATAGCCTATGAACTACTAGCTGCTAAAGGCTTTAAAGATGGTATGGTACCATAT
ATCTCAAACCAATACGAAGAAGAAGCCAAACAAAAGGGCAAGACAATCAATCTCTACGGT
AAAACAAGAGGTTTGGTTACAGATGACTTGGTTTTGGAAAAGGTATTTAATAACCAATAT
CATACTTGGAGTGAGTTTAAGAAAGCTATGTATCAAGAACGACAAGATCAGTTTGATAGA
TTGAACAAAGTTACTTTTAATGATACAACACAGCCTTGGCAAACATTTGCCAAGAAAACT
ACAAGCAGTGTAGATGAATTACAGAAATTAATGGACGTTGCTGTTCGTAAGGATGCAGAA
CACAATTACTACCATTGGAATAACTACAATCCAGACATAGATAGTGAAGTCCACAAGCTC
AAGAGAGCAATCTTTAAAGCCTATCTTGACCAAACAAATGATTTTAGAAGTTCAATTTTT
GAGAATAAAAAATAG
>vaccine3~~~lytA_R6~~~49~~~[Streptococcus_pneumoniae R6]
ATGGAAATTAATGTGAGTAAATTAAGAACAGATTTGCCTCAAGTCGGCGTGCAACCATAT
AGGCAAGTACACGCACACTCAACTGGGAATCCGCATTCAACCGTACAGAATGAAGCGGAT
TATCACTGGCGGAAAGACCCAGAATTAGGTTTTTTCTCGCACATTGTTGGGAACGGTTGC
ATCATGCAGGTAGGACCTGTTGATAATGGTGCCTGGGACGTTGGGGGCGGTTGGAATGCT
GAGACCTATGCAGCGGTTGAACTGATTGAAAGCCATTCAACCAAAGAAGAGTTCATGACG
GACTACCGCCTTTATATCGAACTCTTACGCAATCTAGCAGATGAAGCAGGTTTGCCGAAA
ACGCTTGATACAGGGAGTTTAGCTGGAATTAAAACGCACGAGTATTGCACGAATAACCAA
CCAAACAACCACTCAGACCACGTTGACCCTTATCCATATCTTGCTAAATGGGGCATTAGC
CGTGAGCAGTTTAAGCATGATATTGAGAACGGCTTGACGATTGAAACAGGCTGGCAGAAG
AATGACACTGGCTACTGGTACGTACATTCAGACGGCTCTTATCCAAAAGACAAGTTTGAG
AAAATCAATGGCACTTGGTACTACTTTGACAGTTCAGGCTATATGCTTGCAGACCGCTGG
AGGAAGCACACAGACGGCAACTGGTACTGGTTCGACAACTCAGGCGAAATGGCTACAGGC
TGGAAGAAAATCGCTGATAAGTGGTACTATTTCAACGAAGAAGGTGCCATGAAGACAGGC
TGGGTCAAGTACAAGGACACTTGGTACTACTTAGACGCTAAAGAAGGCGCCATGGTATCA
AATGCCTTTATCCAGTCAGCGGACGGAACAGGCTGGTACTACCTCAAACCAGACGGAACA
CTGGCAGACAGGCCAGAATTCACAGTAGAGCCAGATGGCTTGATTACAGTAAAATAA
>vaccine3~~~lytB_CGSP14~~~50~~~[Streptococcus_pneumoniae CGSP14]
ATGAATTTAGGAGAATTTTGGTACAATAAAATAAATAAGAACAGAGGAAGAAGGTTAATG
AAGAAAGTAAGATTTATTTTTTTAGCTCTGCTATTTTTCTTAGCTAGTCCAGAGGGTGCA
ATGGCTAGTGATGGTACTTGGCAAGGAAAACAGTATCTGAAAGAAGATGGCAGTCAAGCA
GCAAATGAGTGGGTTTTTGATACTCATTATCAATCTTGGTTCTATATAAAAGCAGATGCT
AACTATGCTGAAAATGAATGGCTAAAGCAAGGTGACGACTATTTTTACCTCAAATCTGGT
GGCTATATGGCCAAATCAGAATGGGTAGAAGACAAGGGAGCCTTTTATTATCTTGACCAA
GATGGAAAGATGAAAAGAAATGCTTGGGTAGGAACTTCCTATGTTGGTGCAACAGGTGCC
AAAGTAATAGAAGACTGGGTCTATGATTCTCAATACGATGCTTGGTTTTATATCAAAGCA
GATGGACAGCACGCAGAGAAAGAATGGCTCCAAATTAAAGGGAAGGACTATTATTTCAAA
TCCGGTGGTTATCTACTGACAAGTCAGTGGATTAATCAAGCTTATGTGAATGCTAGTGGT
GCCAAAGTACAGCAAGGTTGGCTTTTTGACAAACAATACCAATCTTGGTTTTACATCAAA
GAAAATGGAAACTATGCTGATAAAGAATGGATTTTCGAGAATGGTCACTATTATTATCTA
AAATCCGGTGGCTACATGGCAGCCAATGAATGGATTTGGGATAAGGAATCTTGGTTTTAT
CTCAAATTTGATGGGAAAATGGCTGAAAAAGAATGGGTCTACGATTCTCATAGTCAAGCT
TGGTACTACTTCAAATCCGGTGGTTACATGACAGCCAATGAATGGATTTGGGATAAGGAA
TCTTGGTTTTATCTCAAATCTGATGGGAAAATAGCTGAAAAAGAATGGGTCTACGATTCT
CATAGTCAAGCTTGGTACTACTTCAAATCCGGTGGTTACATGACAGCCAATGAATGGATT
TGGGATAAGGAATCTTGGTTTTACCTCAAATCTGATGGGAAAATAGCTGAAAAAGAATGG
GTCTACGATTCTCATAGTCAAGCTTGGTACTACTTCAAATCTGGTGGCTACATGGCGAAA
AATGAGACAGTAGATGGTTATCAGCTTGGAAGCGATGGTAAATGGCTTGGAGGAAAAACT
ACAAATGAAAATGCTGCTTACTATCAAGTAGTGCCTGTTACAGCCAATGTTTATGATTCA
GATGGTGAAAAGCTTTCCTATATATCGCAAGGTAGTGTCGTATGGCTAGATAAGGATAGA
AAAAGTGATGACAAGCGCTTGGCTATTACTATTTCTGGTTTGTCAGGCTATATGAAAACA
GAAGATTTACAAGCGCTAGATGCTAGTAAGGACTTTATCCCTTATTATGAGAGTGATGGC
CACCGTTTTTATCACTATGTGGCTCAGAATGCTAGTATCCCAGTAGCTTCTCATCTTTCT
GATATGGAAGTAGGCAAGAAATATTATTCGGCAGATGGCCTGCATTTTGATGGTTTTAAG
CTTGAGAATCCCTTCCTTTTCAAAGATTTAACAGAGGCTACAAACTACAGTGCTGAAGAA
TTGGATAAGGTATTTAGTTTGCTAAACATTAACAATAGCCTTTTGGAGAACAAGGGCGCT
ACTTTTAAGGAAGCCGAAGAACATTACCATATCAATGCTCTTTATCTCCTTGCCCATAGT
GCCCTAGAAAGTAACTGGGGAAGAAGTAAAATTGCCAAAGATAAGAATAATTTCTTTGGC
ATTACAGCCTATGATACGACCCCTTACCTTTCTGCTAAGACATTTGATGATGTGGATAAG
GGAATTTTAGGTGCAACCAAGTGGATTAAGGAAAATTATATCGATAGGGGAAGAACTTTC
CTTGGAAACAAGGCTTCTGGTATGAATGTGGAATATGCTTCAGACCCTTATTGGGGCGAA
AAAATTGCTAGTGTGATGATGAAAATCAATGAGAAGCTAGGTGGCAAAGATTAG
>vaccine3~~~lytB_D39~~~51~~~[Streptococcus_pneumoniae D39]
ATGAAGAAAGTAAGATTTATTTTTTTAGCTCTGCTATTTTTCTTAGCTAGTCCAGAGGGT
GCAATGGCTAGTGATGGTACTTGGCAAGGAAAACAGTATCTGAAAGAAGATGGCAGTCAA
GCAGCGAATGAGTGGGTTTTTGATACTCATTATCAATCTTGGTTCTATATAAAAGCAGAT
GCTAACTATGCTGAAAATGAATGGCTAAAGCAAGGTGACGACTATTTTTACCTCAAATCT
GGTGGCTATATGGCCAAATCAGAATGGGTAGAAGACAAGGGAGCCTTTTATTATCTTGAC
CAAGATGGAAAGATGAAAAGAAATGCTTGGGTAGGAACTTCCTATGTTGGTGCAACAGGT
GCCAAAGTAATAGAAGACTGGGTCTATGATTCTCAATACGATGCTTGGTTTTATATCAAA
GCAGATGGACAGCACGCAGAGAAAGAATGGCTCCAAATTAAAGGGAAGGACTATTATTTC
AAATCCGGTGGTTATCTACTGACAAGTCAGTGGATTAATCAAGCTTATGTGAATGCTAGT
GGTGCCAAAGTACAGCAAGGTTGGCTTTTTGACAAACAATACCAATCTTGGTTTTACATC
AAAGAAAATGGAAACTATGCTGATAAAGAATGGATTTTTGAGAATGGTCACTATTATTAT
CTAAAATCCGGTGGCTACATGGCAGCCAATGAATGGATTTGGGATAAGGAATCTTGGTTT
TATCTCAAATTTGATGGGAAAATAGCTGAAAAAGAATGGGTCTACGATTCTCATAGTCAA
GCTTGGTACTACTTCAAATCCGGTGGCTACATGGCAGCCAATGAATGGATTTGGGATAAG
GAATCTTGGTTTTACCTCAAGTTTGATGGCAAAATGGCTGAAAAAGAATGGGTCTACGAT
TCTCATAGTCAAGCCTGGTACTACTTCAAATCCGGTGGTTACATGACAGCCAATGAATGG
ATTTGGGATAAGGAATCTTGGTTTTATCTCAAATCTGATGGGAAAATAGCTGAAAAAGAA
TGGGTCTACGATTCTCATAGTCAAGCTTGGTACTACTTCAAATCCGGTGGTTACATGACA
GCCAATGAATGGATTTGGGATAAGGAATCTTGGTTTTACCTCAAGTCTGATGGCAAAATG
GCTGAAAAAGAATGGGTCTACGATTCTCATAGTCAAGCCTGGTACTACTTCAAATCTGGT
GGCTACATGGCGAAAAATGAGACAGTAGATGGTTATCAGCTTGGAAGCGATGGTAAATGG
CTTGGAGGAAAAGCTACAAATAAAAATGCTGCTTACTATCAAGTAGTGCCTGTCACAGCC
AATGTTTATGATTCAGATGGTGAAAAGCTTTCCTATATATCGCAAGGTAGTGTCGTATGG
CTAGATAAGGATAGAAAAAGTGATGACAAGCGCTTGGCTATTACTATTTCTGGTTTGTCA
GGCTATATGAAAACAGAAGATTTACAAGCGCTAGATGCTAGTAAGGACTTTATCCCTTAT
TATGAGAGTGATGGCCACCGTTTTTATCACTATGTGGCTCAGAATGCTAGTATCCCAGTA
GCTTCTCATCTTTCTGATATGGAAGTAGGCAAGAAATATTATTCGGCAGATGGCCTGCAT
TTTGATGGTTTTAAGCTTGAGAATCCCTTCCTTTTCAAAGATTTAACAGAGGCTACAAAC
TACAGTGCTGAAGAATTGGATAAGGTATTTAGTTTGCTAAACATTAATAATAGCCTTTTG
GAGAACAAGGGCGCTACTTTTAAGGAAGCCGAAGAACATTACCATATCAATGCCCTTTAT
CTCCTTGCCCATAGTGCCCTAGAAAGTAACTGGGGAAGAAGTAAAATTGCCAAAGATAAG
AATAATTTCTTTGGCATTACAGCCTATGATACGACCCCTTACCTTTCTGCCAAGACATTT
GATGATGTGGATAAGGGAATTTTAGGTGCAACCAAGTGGATTAAGGAAAATTATATCGAT
AGGGGAAGAACTTTCCTTGGAAACAAGGCTTCTGGTATGAATGTGGAATATGCTTCAGAC
CCTTATTGGGGCGAAAAAATTGCTAGTGTGATGATGAAAATCAATGAGAAGCTAGGTGGC
AAAGATTAG
>vaccine3~~~lytB_Hungary19A_6~~~52~~~[Streptococcus_pneumoniae Hungary19A_6]
ATGAAGAAAGTAAGATTTATTTTTTTAGCTCTGCTATTTTTCTTAGCTAGTCCAGAGGGT
GCAATGGCTAGTGATGGTACTTGGCAAGGAAAACAGTATCTGAAAGAAGATGGCAGTCAA
GCAGCGAATGAGTGGATTTTTGATACTCATTATCAATCTTGGTTCTATATAAAAGCAGAT
GCTAACTATGCTGAAAATGAATGGCTAAAGCAAGGTGACGACTATTTTTACCTCAAATCT
GGTGGCTATATGGCCAAATCAGAATGGGTAGAAGACAAGGGAGCCTTTTATTATCTTGAC
CAAGATGGAAAGATGAAAAGAAATGCTTGGGTAGGAACTTCCTATGTTGGTGCAACAGGT
GCCAAAGTAATAGAAGACTGGATCTATGATTCTCAATACGATGCTTGGTTTTATATCAAA
GCAGATGGACAGCACGCAGAGAAAGAATGGCTCCAAATTAAAGGGAAGGACTATTATTTC
AAATCCGGTGGTTATCTACTGACAAGTCAGTGGATTAATCAAGCTTATGTGAATGCTAGT
GGTGCCAAAGTACAGCAAGGTTGGCTTTTTGACAAACAATACCAATCTTGGTTTTACATC
AAAGAAAATGGAAACTATGCTGATAAAGAATGGATTTTCGAGAATGGTCACTATTATTAT
CTAAAATCCGGTGGCTACATGGCAGCCAATGAATGGATTTGGGATAAGGAATCTTGGTTT
TATCTCAAATTTGATGGGAAAATAGCTGAAAAAGAATGGGTCTACGATTCTCATAGTCAA
GCTTGGTACTACTTCAAATCCGGTGGCTACATGGCAGCCAATGAATGGATTTGGGATAAG
GAATCTTGGTTTTACCTCAAGTTTGATGGCAAAATGGCTGAAAAAGAATGGGTCTACGAT
TCTCATAGTCAAGCCTGGTACTACTTCAAATCCGGTGGTTACATGACAGCCAATGAATGG
ATTTGGGATAAGGAATCTTGGTTTTATCTCAAATCTGATGGGAAAATAGCTGAAAAAGAA
TGGGTCTACGATTCTCATAGTCAAGCTTGGTACTACTTCAAATCCGGTGGTTACATGACA
GCCAATGAATGGATTTGGGATAAGGAATCTTGGTTTTACCTCAAGTCTGATGGCAAAATG
GCTGAAAAAGAATGGGTCTACGATTCTCATAGTCAAGCCTGGTACTACTTCAAATCTGGT
GGCTACATGGCGAAAAATGAGACAGTAGATGGTTATCAGCTTGGAAGCGATGGTAAATGG
CTTGGAGGAAAAGCTACAAATAAAAATGCTGCTTACTATCAAGTAGTGCCTGTCACAGCC
AATGTTTATGATTCAGATGGTGAAAAGCTTTCCTATATATCGCAAGGTAGTGTCGTATGG
CTAGATAAGGATAGAAAAAGTGATGACAAGCGCTTGGCTATTACTATTTCTGGTTTGTCA
GGCTATATGAAAACAGAAGATTTACAAGCGCTAGATGCTAGTAAGGACTTTATCCCTTAT
TATGAGAGTGATGGCCACCGTTTTTATCACTATGTGGCTCAGAATGCTAGTATCCCAGTA
GCTTCTCATCTTTCTGATATGGAAGTAGGCAAGAAATATTATTCGGCAGATGGCCTGTAT
TTTGATGGTTTTAAGCTTGAGAATCCCTTCCTTTTCAAAGATTTAACAGAGGCTACAAAC
TACAGTGCTGAAGAATTGGATAAGGTATTTAGTTTGCTAAACATTAATAATAGCCTTTTG
GAGAACAAGGGCGCTACTTTTAAGGAAGCCGAAGAACATTACCATATCAATGCCCTTTAT
CTCCTTGCCCATAGTGCCCTAGAAAGTAACTGGGGAAGAAGTAAAATTGCCAAAGATAAG
AATAATTTCTTTGGCATTACAGCCTATGATACGACCCCTTACCTTTCTGCCAAGACATTT
GATGATGTGGATAAGGGAATTTTAGGTGCAACCAAGTGGATTAAGGAAAATTATATCGAT
AGGGGAAGAACTTTCCTTGGAAACAAGGCTTCTGGTATGAATGTGGAATATGCTTCAGAC
CCTTATTGGGGCGAAAAAATTGCTAGTGTGATGATGAAAATCAATGAGAAGCTAGGTGGC
AAAGATTAG
>vaccine3~~~lytB_R6~~~53~~~[Streptococcus_pneumoniae R6]
ATGAATTTAGGAGAATTTTGGTACAATAAAATAAATAAGAACAGAGGAAGAAGGTTGATG
AAGAAAGTAAGATTTATTTTTTTAGCTCTGCTATTTTTCTTAGCTAGTCCAGAGGGTGCA
ATGGCTAGTGATGGTACTTGGCAAGGAAAACAGTATCTGAAAGAAGATGGCAGTCAAGCA
GCGAATGAGTGGGTTTTTGATACTCATTATCAATCTTGGTTCTATATAAAAGCAGATGCT
AACTATGCTGAAAATGAATGGCTAAAGCAAGGTGACGACTATTTTTACCTCAAATCTGGT
GGCTATATGGCCAAATCAGAATGGGTAGAAGACAAGGGAGCCTTTTATTATCTTGACCAA
GATGGAAAGATGAAAAGAAATGCTTGGGTAGGAACTTCCTATGTTGGTGCAACAGGTGCC
AAAGTAATAGAAGACTGGGTCTATGATTCTCAATACGATGCTTGGTTTTATATCAAAGCA
GATGGACAGCACGCAGAGAAAGAATGGCTCCAAATTAAAGGGAAGGACTATTATTTCAAA
TCCGGTGGTTATCTACTGACAAGTCAGTGGATTAATCAAGCTTATGTGAATGCTAGTGGT
GCCAAAGTACAGCAAGGTTGGCTTTTTGACAAACAATACCAATCTTGGTTTTACATCAAA
GAAAATGGAAACTATGCTGATAAAGAATGGATTTTTGAGAATGGTCACTATTATTATCTA
AAATCCGGTGGCTACATGGCAGCCAATGAATGGATTTGGGATAAGGAATCTTGGTTTTAT
CTCAAATTTGATGGGAAAATAGCTGAAAAAGAATGGGTCTACGATTCTCATAGTCAAGCT
TGGTACTACTTCAAATCCGGTGGCTACATGGCAGCCAATGAATGGATTTGGGATAAGGAA
TCTTGGTTTTACCTCAAGTTTGATGGCAAAATGGCTGAAAAAGAATGGGTCTACGATTCT
CATAGTCAAGCCTGGTACTACTTCAAATCCGGTGGTTACATGACAGCCAATGAATGGATT
TGGGATAAGGAATCTTGGTTTTATCTCAAATCTGATGGGAAAATAGCTGAAAAAGAATGG
GTCTACGATTCTCATAGTCAAGCTTGGTACTACTTCAAATCCGGTGGTTACATGACAGCC
AATGAATGGATTTGGGATAAGGAATCTTGGTTTTACCTCAAGTCTGATGGCAAAATGGCT
GAAAAAGAATGGGTCTACGATTCTCATAGTCAAGCCTGGTACTACTTCAAATCTGGTGGC
TACATGGCGAAAAATGAGACAGTAGATGGTTATCAGCTTGGAAGCGATGGTAAATGGCTT
GGAGGAAAAGCTACAAATAAAAATGCTGCTTACTATCAAGTAGTGCCTGTCACAGCCAAT
GTTTATGATTCAGATGGTGAAAAGCTTTCCTATATATCGCAAGGTAGTGTCGTATGGCTA
GATAAGGATAGAAAAAGTGATGACAAGCGCTTGGCTATTACTATTTCTGGTTTGTCAGGC
TATATGAAAACAGAAGATTTACAAGCGCTAGATGCTAGTAAGGACTTTATCCCTTATTAT
GAGAGTGATGGCCACCGTTTTTATCACTATGTGGCTCAGAATGCTAGTATCCCAGTAGCT
TCTCATCTTTCTGATATGGAAGTAGGCAAGAAATATTATTCGGCAGATGGCCTGCATTTT
GATGGTTTTAAGCTTGAGAATCCCTTCCTTTTCAAAGATTTAACAGAGGCTACAAACTAC
AGTGCTGAAGAATTGGATAAGGTATTTAGTTTGCTAAACATTAATAATAGCCTTTTGGAG
AACAAGGGCGCTACTTTTAAGGAAGCCGAAGAACATTACCATATCAATGCCCTTTATCTC
CTTGCCCATAGTGCCCTAGAAAGTAACTGGGGAAGAAGTAAAATTGCCAAAGATAAGAAT
AATTTCTTTGGCATTACAGCCTATGATACGACCCCTTACCTTTCTGCCAAGACATTTGAT
GATGTGGATAAGGGAATTTTAGGTGCAACCAAGTGGATTAAGGAAAATTATATCGATAGG
GGAAGAACTTTCCTTGGAAACAAGGCTTCTGGTATGAATGTGGAATATGCTTCAGACCCT
TATTGGGGCGAAAAAATTGCTAGTGTGATGATGAAAATCAATGAGAAGCTAGGTGGCAAA
GATTAG
>vaccine3~~~lytB_TIGR4~~~54~~~[Streptococcus_pneumoniae TIGR4]
ATGAAGAAAGTAAGATTTATTTTTTTAGCTCTGCTATTTTTCTTAGCTAGTCCAGAGGGT
GCAATGGCTAGTGATGGTACTTGGCAAGGAAAACAGTATCTGAAAGAAGATGGCAGTCAA
GCAGCAAATGAGTGGGTTTTTGATACTCATTATCAATCTTGGTTCTATATAAAAGCAGAT
GCTAACTATGCTGAAAATGAATGGCTAAAGCAAGGTGACGACTATTTTTACCTCAAATCT
GGTGGCTATATGGCCAAATCAGAATGGGTAGAAGACAAGGGAGCCTTTTATTATCTTGAC
CAAGATGGAAAGATGAAAAGAAATGCTTGGGTAGGAACTTCCTATGTTGGTGCAACAGGT
GCCAAAGTAATAGAAGACTGGGTCTATGATTCTCAATACGATGCTTGGTTTTATATCAAA
GCAGATGGACAGCACGCAGAGAAAGAATGGCTCCAAATTAAAGGGAAGGACTATTATTTC
AAATCCGGTGGTTATCTACTGACAAGTCAGTGGATTAATCAAGCTTATGTGAATGCTAGT
GGTGCCAAAGTACAGCAAGGTTGGCTTTTTGACAAACAATACCAATCTTGGTTTTACATC
AAAGAAAATGGAAACTATGCTGATAAAGAATGGATTTTCGAGAATGGTCACTATTATTAT
CTAAAATCCGGTGGCTACATGGCAGCCAATGAATGGATTTGGGATAAGGAATCTTGGTTT
TATCTCAAATTTGATGGGAAAATGGCTGAAAAAGAATGGGTCTACGATTCTCATAGTCAA
GCTTGGTACTACTTCAAATCCGGTGGTTACATGACAGCCAATGAATGGATTTGGGATAAG
GAATCTTGGTTTTATCTCAAATCTGATGGGAAAATAGCTGAAAAAGAATGGGTCTACGAT
TCTCATAGTCAAGCTTGGTACTACTTCAAATCCGGTGGTTACATGACAGCCAATGAATGG
ATTTGGGATAAGGAATCTTGGTTTTACCTCAAATCTGATGGGAAAATAGCTGAAAAAGAA
TGGGTCTACGATTCTCATAGTCAAGCTTGGTACTACTTCAAATCTGGTGGCTACATGGCG
AAAAATGAGACAGTAGATGGTTATCAGCTTGGAAGCGATGGTAAATGGCTTGGAGGAAAA
ACTACAAATGAAAATGCTGCTTACTATCAAGTAGTGCCTGTTACAGCCAATGTTTATGAT
TCAGATGGTGAAAAGCTTTCCTATATATCGCAAGGTAGTGTCGTATGGCTAGATAAGGAT
AGAAAAAGTGATGACAAGCGCTTGGCTATTACTATTTCTGGTTTGTCAGGCTATATGAAA
ACAGAAGATTTACAAGCGCTAGATGCTAGTAAGGACTTTATCCCTTATTATGAGAGTGAT
GGCCACCGTTTTTATCACTATGTGGCTCAGAATGCTAGTATCCCAGTAGCTTCTCATCTT
TCTGATATGGAAGTAGGCAAGAAATATTATTCGGCAGATGGCCTGCATTTTGATGGTTTT
AAGCTTGAGAATCCCTTCCTTTTCAAAGATTTAACAGAGGCTACAAACTACAGTGCTGAA
GAATTGGATAAGGTATTTAGTTTGCTAAACATTAACAATAGCCTTTTGGAGAACAAGGGC
GCTACTTTTAAGGAAGCCGAAGAACATTACCATATCAATGCTCTTTATCTCCTTGCCCAT
AGTGCCCTAGAAAGTAACTGGGGAAGAAGTAAAATTGCCAAAGATAAGAATAATTTCTTT
GGCATTACAGCCTATGATACGACCCCTTACCTTTCTGCTAAGACATTTGATGATGTGGAT
AAGGGAATTTTAGGTGCAACCAAGTGGATTAAGGAAAATTATATCGATAGGGGAAGAACT
TTCCTTGGAAACAAGGCTTCTGGTATGAATGTGGAATATGCTTCAGACCCTTATTGGGGC
GAAAAAATTGCTAGTGTGATGATGAAAATCAATGAGAAGCTAGGTGGCAAAGATTAG
>vaccine3~~~lytC_R6~~~55~~~[Streptococcus_pneumoniae R6]
ATGTCTGTTACATTTTTTATAGGAGAGGAAAGATTGAAAATAAAAATTGGATTAGCAAGT
ATCTGTTTACTAGGCTTGGCAACTAGTCATGTCGCTGCAAATGAAACTGAAGTAGCAAAA
ACTTCGCAGGATACAACGACAGCTTCAAGTAGTTCAGAGCAAAATCAGTCTTCTAATAAA
ACGCAAACGAGCGCAGAAGTACAGACTAATGCTGCTGCCTACTGGGATGGGGATTATTAT
GTAAAGGATGATGGTTCTAAAGCTCAAAGTGAATGGATTTTTGACAACTACTATAAGGCT
TGGTTTTATATTAATTCAGATGGTCGTTACTCGCAGAATGAATGGCATGGAAATTACTAC
CTGAAATCAGGTGGATATATGGCCCAAAACGAGTGGATCTATGACAGTAATTACAAGAGT
TGGTTTTATCTCAAGTCAGATGGGGCTTATGCTCATCAAGAATGGCAATTGATTGGAAAT
AAGTGGTACTACTTCAAGAAGTGGGGTTACATGGCTAAAAGCCAATGGCAAGGAAGTTAT
TTCTTGAATGGTCAAGGAGCTATGATACAAAATGAATGGCTCTATGATCCAGCTTATTCT
GCTTATTTTTATCTAAAATCCGATGGAACTTATGCTAACCAAGAGTGGCAAAAAGTGGGC
GGCAAATGGTACTATTTCAAGAAGTGGGGCTATATGGCTCGGAATGAGTGGCAAGGCAAC
TACTATTTGACTGGAAGTGGTGCCATGGCGACTGACGAAGTGATTATGGATGGTGCTCGC
TATATCTTTGCGGCCTCTGGTGAGCTCAAAGAAAAGAAAGATTTGAATGTCGGCTGGGTT
CACAGAGATGGTAAACGCTATTTCTTTAATAATAGAGAAGAACAAGTGGGAACCGAACAT
GCTAAGAAAATCATTGATATTAGTGAGCACAATGGTCGTATCAATGATTGGAAAAAGGTT
ATTGATGAGAACAAGGTGGATGGTGTCATTGTTCGTCTAGGTTATAGCGGTAAAGAAGAC
AAGGAATTGGCGCATAACATTAAGGAGTTAAACCGTCTGGGAATTCCTTATGGTGTCTAT
CTCTATACCTATGCTGAAAATGAGACCGATGCTGAGAATGACGCTAAACAGACCATTGAA
CTTATAAAGAAATACAATATGAACCTGTCTTACCCTATCTATTATGATGTTGAGAACTGG
GAATATGTAAATAAGAGCAAGAGAGCTCCAAGTGATACAGACACTTGGGTTAAAATCATC
AACAAGTACATGGACACGATGAAGCAGGCGGGTTATCAAAATGTATATGTCTATAGCTAT
CGTAGTTTATTACAGACGCGTTTAAAACACCCAGATATTTTAAAACATGTAAACTGGGTA
GCGGCCTATACGAATGCTTTAGAATGGGAAAACCCTTATTATTCAGGAGAAAAAGGTTGG
CAATATACCTCTTCTGAATACATGAAAGGAATCCAAGGGCGCGTAGATGTCAGCGTTTGG
TATTAA
>vaccine3~~~pce_cbpE~~~56~~~[Streptococcus_pneumoniae R6]
ATGAAAAAGAAATTAACTAGTTTAGCACTTGTAGGCGCTTTTTTAGGTTTGTCATGGTAT
GGGAATGTTCAGGCTCAAGAAAGTTCAGGAAATAAAATCCACTTTATCAATGTTCAAGAA
GGTGGCAGTGATGCGATTATTCTTGAAAGCAATGGACATTTTGCCATGGTGGATACAGGA
GAAGATTATGATTTCCCAGATGGAAGTGATTCTCGTTATCCATGGAGAGAAGGAATTGAA
ACGTCTTATAAGCATGTTCTAACAGACCGTGTCTTTCGTCGTTTGAAGGAATTGAGTGTC
CAAAAACTTGATTTTATTTTGGTGACCCATACCCACAGTGATCATATTGGAAATGTTGAT
GAATTACTGTCTACCTATCCAGTTGACCGAGTCTATCTTAAGAAATATAGTGATAGTCGT
ATTACTAATTCTGAACGTCTATGGGATAATCTGTATGGCTATGATAAGGTTTTACAGACT
GCTACAGAAACAGGTGTTTCAGTTATTCAAAATATCACACAAGGGGATGCTCATTTTCAG
TTTGGGGACATGGATATTCAGCTCTATAATTATGAAAATGAAACTGATTCATCGGGTGAA
TTAAAGAAAATTTGGGATGACAATTCCAATTCCTTGATTAGCGTGGTGAAAGTCAATGGC
AAGAAAATTTACCTTGGGGGCGATTTAGATAATGTTCATGGAGCAGAAGACAAGTATGGT
CCTCTCATTGGAAAAGTTGATTTGATGAAGTTTAATCATCACCATGATACCAACAAATCA
AATACCAAGGATTTCATTAAAAATTTGAGTCCGAGTTTGATTGTTCAAACTTCGGATAGT
CTACCTTGGAAAAATGGTGTTGATAGTGAGTATGTTAATTGGCTCAAAGAACGAGGAATT
GAGAGAATCAACGCAGCCAGCAAAGACTATGATGCAACAGTTTTTGATATTCGAAAAGAC
GGTTTTGTCAATATTTCAACATCCTACAAGCCGATTCCAAGTTTTCAAGCTGGTTGGCAT
AAGAGTGCATATGGGAACTGGTGGTATCAAGCGCCTGATTCTACAGGAGAGTATGCTGTC
GGTTGGAATGAAATCGAAGGTGAATGGTATTACTTTAACCAAACGGGTATCTTGTTACAG
AATCAATGGAAAAAATGGAACAATCATTGGTTCTATTTGACAGACTCTGGTGCTTCTGCT
AAAAATTGGAAGAAAATTGATGGAATCTGGTATTATTTTAACAAAGAAAATCAGATGGAA
ATTGGTTGGGTTCAAGATAAAGAGCAGTGGTATTATTTGGATGTTGATGGTTCTATGAAG
ACAGGATGGCTTCAATATATGGGGCAATGGTATTACTTTGCTCCATCAGGGGAAATGAAA
ATGGGCTGGGTAAAAGATAAAGAAACCTGGTACTATATGGATTCTACTGGTGTCATGAAG
ACAGGTGAGATAGAAGTTGCTGGTCAACATTATTATCTGGAAGATTCAGGAGCTATGAAG
CAAGGCTGGCATAAAAAGGCAAATGATTGGTATTTCTACAAGACAGACGGTTCACGAGCT
GTGGGTTGGATCAAGGACAAGGATAAATGGTACTTCTTGAAAGAAAATGGTCAATTACTT
GTGAACGGTAAGACACCAGAAGGTTATACTGTGGATTCAAGTGGTGCCTGGTTAGTGGAT
GTTTCGATCGAGAAATCTGCTACAATTAAAACTACAAGTCATTCAGAAATAAAAGAATCC
AAAGAAGTAGTGAAAAAGGATCTTGAAAATAAAGAAACGAGTCAACATGAAAGTGTTACA
AATTTTTCAACTAGTCAAGATTTGACATCCTCAACTTCACAAAGCTCTGAAACGAGTGTA
AACAAATCGGAATCAGAACAGTAG
>vaccine3~~~psaA_R6~~~57~~~[Streptococcus_pneumoniae R6]
ATGAAAAAATTAGGTACATTACTCGTTCTCTTTCTTTCTGCAATCATTCTTGTAGCATGT
GCTAGCGGAAAAAAAGATACAACTTCTGGTCAAAAACTAAAAGTTGTTGCTACAAACTCA
ATCATCGCTGATATTACTAAAAATATTGCTGGTGACAAAATTGACCTTCATAGTATCGTT
CCGATTGGGCAAGACCCACACGAATACGAACCACTTCCTGAAGACGTTAAGAAAACTTCT
GAGGCTGATTTGATTTTCTATAACGGTATCAACCTTGAAACAGGTGGCAATGCTTGGTTT
ACAAAATTGGTAGAAAATGCCAAGAAAACTGAAAACAAAGACTACTTCGCAGTCAGCGAC
GGCGTTGATGTTATCTACCTTGAAGGTCAAAATGAAAAAGGAAAAGAAGACCCACACGCT
TGGCTTAACCTTGAAAACGGTATTATTTTTGCTAAAAATATCGCCAAACAATTGAGCGCC
AAAGACCCTAACAATAAAGAATTCTATGAAAAAAATCTCAAAGAATATACTGATAAGTTA
GACAAACTTGATAAAGAAAGTAAGGATAAATTTAATAAGATCCCTGCTGAAAAGAAACTC
ATTGTAACCAGCGAAGGAGCATTCAAATACTTCTCTAAAGCCTATGGTGTTCCAAGTGCC
TACATCTGGGAAATCAATACTGAAGAAGAAGGAACTCCTGAACAAATCAAGACCTTGGTT
GAAAAACTTCGCCAAACAAAAGTTCCATCACTCTTTGTAGAATCAAGTGTGGATGACCGT
CCAATGAAAACTGTTTCTCAAGACACAAACATCCCAATCTACGCACAAATCTTTACTGAC
TCTATCGCAGAACAAGGTAAAGAAGGCGACAGCTACTACAGCATGATGAAATACAACCTT
GACAAGATTGCTGAAGGATTGGCAAAATAA
>vaccine3~~~pspA_CGSP14~~~58~~~[Streptococcus_pneumoniae CGSP14]
ATGAATAAGAAAAAAATGATTTTAACAAGTCTAGCCAGCGTCGCTATCTTAGGGGCTGGT
TTTGTTGCGTCTCAGCCTACTGTTGTAAGAGCAGAAGAAGCTCCCGTAGCTAGTCAGTCT
AAAGCTGAGAAAGACTATGATGCAGCAATGGAAAAATATAAAGCTGCTGAGGAAGACTTA
AAAAAAGCAGAAGCTGCTCAGAGGAAATATGACGAGGATCAGAAGAAAACTGAGGAGAAA
GCGAAAGAAACAGAAGAAGCTTCTAAAAGACAACAAGCTGCAAATCTGAAATATCAACTA
AAGTTGCGTGAATATCTTAAATATATACAAGAAAAAAATAAGGAAAAAATAGCTAAAGCT
GAGAAAGAAATGAACGAAGCTAAGCAAGAGGAAGACAAAGAAAAGGCAAACCTTAATAAA
GTTCTCGCAAAAGTAATTCCTAGCGATAGAGAATTAGAAAAAACTAGACAAGAAGCAGAA
AAGGCTAAAAAAAATATACCAGAACTTAAGAAAAAAGTAGAAGAAGCCAAACAAAAAGTG
GATGCAGCCAAACAAAAAGTGGATGCAGAACATGCTAAAGAAGTTGCTCCTCAAGCTAAA
ATCGCTGAATTGGAAAATCAAGTTCATAGGCTAGAACAAGATCTCAAAGATATTAATGAG
TCTGACTCAGAAGATTATGTTAAAGAAGGTCTCCGTGCTCCTCTTCAATCTGAATTGGAT
ACCAAAAAAGCTAAACTATTGAAACTTGAAGAGTTGAGTGGTAAGATTGAAGAGTTAGAC
GCTGAAATTGCAGAACTTGAAGTTCAACTTAAAGATGCTGAAGGAAACAATAATGTAGAA
GCCTACTTTAAAGAAGGTTTAGAGAAAACTACTGCTGAGAAAAAAGCTGAATTAGAAAAA
GCTGAAGCTGACCTTAAGAAAGCAGTTGATGAGCCAGAAACTCCAGCTCCGGCTCCAGCC
CCAGCTCCAGCTCCAACTCCAGAAGCCCCAGCTCCAGCTCCAGCTCCAGCTCCGGCTCCT
AAACCAGCTCCGGCTCCTAAACCAGCTCCGGCTCCTAAACCAGCTCCGGCTCCTAAACCA
GCTCCGGCTCCTAAACCAGCTCCAGCTCCGGCTCCTAAACCAGAAAAGCCAGCAGAAAAA
CCAGCTCCAGCTCCTAAACCAGAAACTCCAAAAACAGGCTGGAAACAAGAAAATGGTATG
TGGTACTTCTACAATACGGATGGTTCAATGGCAACAGGCTGGCTACAAAATAATGGCTCA
TGGTACTACCTCAACGCTAATGGTGCTATGGCAACAGGTTGGGCTAAAGTCAACGGCTTA
TGGTATTACCTCAACAGCAATGGCGCTATGGCGACAGGATGGCTCCAATACAATGATTCA
TGGTACTACCTCAATACTAATGGTGCTATGGCGACAGGTTGGCTAGAATACAATGGTTCA
TGGTACTACCTCAACGCTAATGGTGCTATGGCGACAGGTTGGCTAGAATACAATGGCTCA
TGGTACTACCTCAACAGCAATGGCGCTATGGCGACAGGATGGCTCCAATACAATGGTTCA
TGGTACTATCTAAACGCTAACGGCGCTATGGCAACAGGTTGGGCTAAAGTCAACGGTTCA
TGGTACTACCTCAACGCTAACGGTTCAATGGCAACAGGTTGGGTGAAAGATGGAGATACC
TGGTACTATCTTGAAGCATCAGGTGCTATGAAAGCAAACCAATGGTTCAAAGTATCAGAT
AAATGGTACTATGTCAATGGCTTAGGTGCCCTTGCAGTCAACACAACTGTAGACGGATAT
ACTGTCAATGAAAACGGTGAATGGGTTTAA
>vaccine3~~~pspA_D39~~~59~~~[Streptococcus_pneumoniae D39]
ATGAATAAGAAAAAAATGATTTTAACAAGTCTAGCCAGCGTCGCTATCTTAGGGGCTGGT
TTTGTTGCGTCTCAGCCTACTGTTGTAAGAGCAGAAGAATCTCCCGTAGCCAGTCAGTCT
AAAGCTGAGAAAGACTATGATGCAGCGAAGAAAGATGCTAAGAATGCGAAAAAAGCAGTA
GAAGATGCTCAAAAGGCTTTAGATGATGCAAAAGCTGCTCAGAAAAAATATGACGAGGAT
CAGAAGAAAACTGAGGAGAAAGCCGCGCTAGAAAAAGCAGCGTCTGAAGAGATGGATAAG
GCAGTGGCAGCAGTTCAACAAGCGTATCTAGCCTATCAACAAGCTACAGACAAAGCCGCA
AAAGACGCAGCAGATAAGATGATAGATGAAGCTAAGAAACGCGAAGAAGAGGCAAAAACT
AAATTTAATACTGTTCGAGCAATGGTAGTTCCTGAGCCAGAGCAGTTGGCTGAGACTAAG
AAAAAATCAGAAGAAGCTAAACAAAAAGCACCAGAACTTACTAAAAAACTAGAAGAAGCT
AAAGCAAAATTAGAAGAGGCTGAGAAAAAAGCTACTGAAGCCAAACAAAAAGTGGATGCT
GAAGAAGTCGCTCCTCAAGCTAAAATCGCTGAATTGGAAAATCAAGTTCATAGACTAGAA
CAAGAGCTCAAAGAGATTGATGAGTCTGAATCAGAAGATTATGCTAAAGAAGGTTTCCGT
GCTCCTCTTCAATCTAAATTGGATGCCAAAAAAGCTAAACTATCAAAACTTGAAGAGTTA
AGTGATAAGATTGATGAGTTAGACGCTGAAATTGCAAAACTTGAAGATCAACTTAAAGCT
GCTGAAGAAAACAATAATGTAGAAGACTACTTTAAAGAAGGTTTAGAGAAAACTATTGCT
GCTAAAAAAGCTGAATTAGAAAAAACTGAAGCTGACCTTAAGAAAGCAGTTAATGAGCCA
GAAAAACCAGCTCCAGCTCCAGAAACTCCAGCCCCAGAAGCACCAGCTGAACAACCAAAA
CCAGCGCCGGCTCCTCAACCAGCTCCCGCACCAAAACCAGAGAAGCCAGCTGAACAACCA
AAACCAGAAAAAACAGATGATCAACAAGCTGAAGAAGACTATGCTCGTAGATCAGAAGAA
GAATATAATCGCTTGACTCAACAGCAACCGCCAAAAGCTGAAAAACCAGCTCCTGCACCA
AAAACAGGCTGGAAACAAGAAAACGGTATGTGGTACTTCTACAATACTGATGGTTCAATG
GCGACAGGATGGCTCCAAAACAACGGTTCATGGTACTACCTCAACAGCAATGGTGCTATG
GCTACAGGTTGGCTCCAATACAATGGTTCATGGTATTACCTCAACGCTAACGGCGCTATG
GCAACAGGTTGGGCTAAAGTCAACGGTTCATGGTACTACCTCAACGCTAATGGTGCTATG
GCTACAGGTTGGCTCCAATACAACGGTTCATGGTATTACCTCAACGCTAACGGCGCTATG
GCAACAGGTTGGGCTAAAGTCAACGGTTCATGGTACTACCTCAACGCTAATGGTGCTATG
GCTACAGGTTGGCTCCAATACAACGGTTCATGGTACTACCTCAACGCTAACGGTGCTATG
GCTACAGGTTGGGCTAAAGTCAACGGTTCATGGTACTACCTCAACGCTAATGGTGCTATG
GCAACAGGTTGGGTGAAAGATGGAGATACCTGGTACTATCTTGAAGCATCAGGTGCTATG
AAAGCAAGCCAATGGTTCAAAGTATCAGATAAATGGTACTATGTCAATGGTTTAGGTGCC
CTTGCAGTCAACACAACTGTAGATGGCTATAAAGTCAATGCCAATGGTGAATGGGTTTAA
>vaccine3~~~pspA_Hungary19A_6~~~60~~~[Streptococcus_pneumoniae Hungary19A_6]
ATGAATAAGAAAAAAATGATTTTAACAAGCCTAGCCAGCGTCGCTATCTTAGGGGCTGGT
TTTGTTACGTCTCAGCCTACTTTTGTAAGAGCAGAAGAAGCTCCCGTAGCTAGTCAGTCT
AAAGCTGAGAAAGACTATGATGCAGCAGTGAAAAAATCTGAAGCTGCTAAGAAACATTAC
GAAGAAGCTAAAAAGAAAGCAAAAGAAGCTCAGAAAAAATATGATGAGGATCAGAAGAAA
ACTGAAGATAAGGCAGAGGCAGTTAAGAAAGCTGATGAAGAACTTCAAAAAGCGAATTTG
GCAGTTCAAAAGGCGTATGTAGAATATAGAGAAGCGAAAGATAAAGCTAGCGCTGAGAAA
AAGATTGAAGAAGCAAAACGAAAACAAAAAGAAGCGAACAAAAAATTTAATGAGGAGCAA
GCAAAAGTAGTTCCTGAAGCAAAGGAGTTAGCTGCTACTAAACAAAAAGCGGAAAAAGCT
AAAAAAGACGCCGAAGTAGCTAAGGAAAAATATGATAAGGCAGTTCAAGAGGTAGAAGTA
GAGAAAAATAAAATACTTGAACAAGATGCTGAAAACGAAAAGAAAATTGACGTACTTCAA
AACAAAGTCGCTGATTTAGAAAAAGGAATTGCTCTTTATCAAAACAAAGTCGCTGAATTA
AATAAAGAAATTGCTAGACTTCAAAGCGATTTAAAAGATGCTGAAGAAAATAATGTAGAA
GACTATATTAAAGAAGGTTTAGAGCAAGCTATCGCTGATAAAAAAGCTGAATTAGCTACA
ACTCAACAAAACATAGATAAAACTCAAAAAGATTTAGAGGATGCTGAATTAGAACTTGAA
AAAGTATTAGCTACATTAGACCCTGAAGGTAAAACTCAAGATGAATTAGATAAAGAAGCT
GCAGAAGATGCTAATATTGAAGCTCTTCAAAACAAAGTTGCTGATCTAGAAAACAAGGTT
GCTGAATTAGATAAAGAAGTTACTAGACTTCAAAGCGATTTAAAAGATGCTGAAGAAAAC
AATGTAGAAGACTACGTTAAAGAAGGCTTAGAGAAAGCTCTTACTGATAAAAAAGTTGAA
TTAAATAATACTCAAAAAGCATTAGATACTGCTCAAAAAGCATTAGATACTGCTCTTAAT
GAATTAGGTCCTGACGGTGATGAAGAAGAAACTCCAGCTCCAGCACCAAAACCAGAGCAA
CCAGCTGAACAACCAAAACCAGCGCCGGCTCCTCAACCAGCTCCAGCACCAAAACCAGAA
AAAACAGATGATCAACAAGCTGAAGAAGACTATGCTCGTAGATCAGAAGAAGAATATAAC
CGCTTGCCCCAACAGCAACCGCCAAAAGCAGAAAAACCAGCTCCAGCACCAAAACCAGAG
CAACCAGTTCCTGCACCAAAACCAGGTTGGAAACAAGAAAACGGTATGTGGTACTTCTAC
AATACTGATGGTTCAATGGCTACAGGTTGGCTCCAAAACAACGGTTCATGGTATTACCTC
AACAGCAATGGCGCTATGGCTACAGGTTGGCTCCAATACAATGGTTCATGGTATTACCTA
AACGCTAACGGCGCTATGGCAACAGGTTGGGCTAAAGTCAACGGTTCATGGTACTACCTA
AACGCTAATGGTGCTATGGCTACAGGTTGGCTCCAATACAACGATTCATGGTATTACCTA
AACGCTAACGGCGCTATGGCGACAGGATGGCTCCAATACAACGGTTCATGGTACTACCTC
AACGCTAACGGTGCTATGGCTACAGGTTGGGCTAAAGTCAACGGTTCATGGTACTACCTC
AACGCTAATGGTGCTATGGCTACAGGTTGGCTCCAATACAACGGTTCATGGTATTACCTA
AACGCTAACGGTGCTATGGCTACAGGTTGGGCTAAAGTCAACGGTTCATGGTACTACCTC
AACGCTAACGGTTCAATGGCAACAGGTTGGGTGAAAGATGGAGATACCTGGTACTATCTT
GAAGCATCAGGTGCTATGAAAGCAAGCCAATGGTTCAAAGTATCAGATAAATGGTACTAT
GTCAATGGTTTAGGTGCCCTTGCAGTCAACACAACTGTAGATGGCTATAAAGTCAATGCC
AATGGTGAATGGGTTTAA
>vaccine3~~~pspA_R6~~~61~~~[Streptococcus_pneumoniae R6]
ATGAATAAGAAAAAAATGATTTTAACAAGTCTAGCCAGCGTCGCTATCTTAGGGGCTGGT
TTTGTTGCGTCTCAGCCTACTGTTGTAAGAGCAGAAGAATCTCCCGTAGCCAGTCAGTCT
AAAGCTGAGAAAGACTATGATGCAGCGAAGAAAGATGCTAAGAATGCGAAAAAAGCAGTA
GAAGATGCTCAAAAGGCTTTAGATGATGCAAAAGCTGCTCAGAAAAAATATGACGAGGAT
CAGAAGAAAACTGAGGAGAAAGCCGCGCTAGAAAAAGCAGCGTCTGAAGAGATGGATAAG
GCAGTGGCAGCAGTTCAACAAGCGTATCTAGCCTATCAACAAGCTACAGACAAAGCCGCA
AAAGACGCAGCAGATAAGATGATAGATGAAGCTAAGAAACGCGAAGAAGAGGCAAAAACT
AAATTTAATACTGTTCGAGCAATGGTAGTTCCTGAGCCAGAGCAGTTGGCTGAGACTAAG
AAAAAATCAGAAGAAGCTAAACAAAAAGCACCAGAACTTACTAAAAAACTAGAAGAAGCT
AAAGCAAAATTAGAAGAGGCTGAGAAAAAAGCTACTGAAGCCAAACAAAAAGTGGATGCT
GAAGAAGTCGCTCCTCAAGCTAAAATCGCTGAATTGGAAAATCAAGTTCATAGACTAGAA
CAAGAGCTCAAAGAGATTGATGAGTCTGAATCAGAAGATTATGCTAAAGAAGGTTTCCGT
GCTCCTCTTCAATCTAAATTGGATGCCAAAAAAGCTAAACTATCAAAACTTGAAGAGTTA
AGTGATAAGATTGATGAGTTAGACGCTGAAATTGCAAAACTTGAAGATCAACTTAAAGCT
GCTGAAGAAAACAATAATGTAGAAGACTACTTTAAAGAAGGTTTAGAGAAAACTATTGCT
GCTAAAAAAGCTGAATTAGAAAAAACTGAAGCTGACCTTAAGAAAGCAGTTAATGAGCCA
GAAAAACCAGCTCCAGCTCCAGAAACTCCAGCCCCAGAAGCACCAGCTGAACAACCAAAA
CCAGCGCCGGCTCCTCAACCAGCTCCCGCACCAAAACCAGAGAAGCCAGCTGAACAACCA
AAACCAGAAAAAACAGATGATCAACAAGCTGAAGAAGACTATGCTCGTAGATCAGAAGAA
GAATATAATCGCTTGACTCAACAGCAACCGCCAAAAGCTGAAAAACCAGCTCCTGCACCA
AAAACAGGCTGGAAACAAGAAAACGGTATGTGGTACTTCTACAATACTGATGGTTCAATG
GCGACAGGATGGCTCCAAAACAACGGTTCATGGTACTACCTCAACAGCAATGGTGCTATG
GCTACAGGTTGGCTCCAATACAATGGTTCATGGTATTACCTCAACGCTAACGGTGCTATG
GCAACAGGTTGGGCTAAAGTCAACGGTTCATGGTACTACCTCAACGCTAATGGTGCTATG
GCTACAGGTTGGCTCCAATACAACGGTTCATGGTATTACCTCAACGCTAACGGCGCTATG
GCAACAGGTTGGGCTAAAGTCAACGGTTCATGGTACTACCTCAACGCTAATGGTGCTATG
GCTACAGGTTGGCTCCAATACAACGGTTCATGGTACTACCTCAACGCTAACGGTGCTATG
GCTACAGGTTGGGCTAAAGTCAACGGTTCATGGTACTACCTCAACGCTAATGGTGCTATG
GCAACAGGTTGGGTGAAAGATGGAGATACCTGGTACTATCTTGAAGCATCAGGTGCTATG
AAAGCAAGCCAATGGTTCAAAGTATCAGATAAATGGTACTATGTCAATGGTTTAGGTGCC
CTTGCAGTCAACACAACTGTAGATGGCTATAAAGTCAATGCCAATGGTGAATGGGTTTAA
>vaccine3~~~pspA_TIGR4~~~62~~~[Streptococcus_pneumoniae TIGR4]
ATGAATAAGAAAAAAATGATTTTAACAAGTCTAGCCAGCGTCGCTATCTTAGGGGCTGGT
TTTGTTACGTCTCAGCCTACTTTTGTAAGAGCAGAAGAATCTCCACAAGTTGTCGAAAAA
TCTTCATTAGAGAAGAAATATGAGGAAGCAAAAGCAAAAGCTGATACTGCCAAGAAAGAT
TACGAAACGGCTAAAAAGAAAGCAGAAGACGCTCAGAAAAAGTATGAAGATGATCAGAAG
AGAACTGAGGAGAAAGCTCGAAAAGAAGCAGAAGCATCTCAAAAATTGAATGATGTGGCG
CTTGTTGTTCAAAATGCATATAAAGAGTACCGAGAAGTTCAAAATCAACGTAGTAAATAT
AAATCTGACGCTGAATATCAGAAAAAATTAACAGAGGTCGACTCTAAAATAGAGAAGGCT
AGGAAAGAGCAACAGGACTTGCAAAATAAATTTAATGAAGTAAGAGCAGTTGTAGTTCCT
GAACCAAATGCGTTGGCTGAGACTAAGAAAAAAGCAGAAGAAGCTAAAGCAGAAGAAAAA
GTAGCTAAGAGAAAATATGATTATGCAACTCTAAAGGTAGCACTAGCGAAGAAAGAAGTA
GAGGCTAAGGAACTTGAAATTGAAAAACTTCAATATGAAATTTCTACTTTGGAACAAGAA
GTTGCTACTGCTCAACATCAAGTAGATAATTTGAAAAAACTTCTTGCTGGTGCGGATCCT
GATGATGGCACAGAAGTTATAGAAGCTAAATTAAAAAAAGGAGAAGCTGAGCTAAACGCT
AAACAAGCTGAGTTAGCAAAAAAACAAACAGAACTTGAAAAACTTCTTGACAGCCTTGAT
CCTGAAGGTAAGACTCAGGATGAATTAGATAAAGAAGCAGAAGAAGCTGAGTTGGATAAA
AAAGCTGATGAACTTCAAAATAAAGTTGCTGATTTAGAAAAAGAAATTAGTAACCTTGAA
ATATTACTTGGAGGGGCTGATCCTGAAGATGATACTGCTGCTCTTCAAAATAAATTAGCT
GCTAAAAAAGCTGAGTTAGCAAAAAAACAAACAGAACTTGAAAAACTTCTTGACAGCCTT
GATCCTGAAGGTAAGACTCAGGATGAATTAGATAAAGAAGCAGAAGAAGCTGAGTTGGAT
AAAAAAGCTGATGAACTTCAAAATAAAGTTGCTGATTTAGAAAAAGAAATTAGTAACCTT
GAAATATTACTTGGAGGGGCTGATTCTGAAGATGATACTGCTGCTCTTCAAAATAAATTA
GCTACTAAAAAAGCTGAATTGGAAAAAACTCAAAAAGAATTAGATGCAGCTCTTAATGAG
TTAGGCCCTGATGGAGATGAAGAAGAAACTCCAGCGCCGGCTCCTCAACCAGAGCAACCA
GCTCCTGCACCAAAACCAGAGCAACCAGCTCCAGCTCCAAAACCAGAGCAACCAGCTCCT
GCACCAAAACCAGAGCAACCAGCTCCAGCTCCAAAACCAGAGCAACCAGCTCCAGCTCCA
AAACCAGAGCAACCAGCTAAGCCGGAGAAACCAGCTGAAGAGCCTACTCAACCAGAAAAA
CCAGCCACTCCAAAAACAGGCTGGAAACAAGAAAACGGTATGTGGTATTTCTACAATACT
GATGGTTCAATGGCAATAGGTTGGCTCCAAAACAACGGTTCATGGTACTACCTAAACGCT
AACGGCGCTATGGCAACAGGTTGGGTGAAAGATGGAGATACCTGGTACTATCTTGAAGCA
TCAGGTGCTATGAAAGCAAGCCAATGGTTCAAAGTATCAGATAAATGGTACTATGTCAAC
AGCAATGGCGCTATGGCGACAGGCTGGCTCCAATACAATGGCTCATGGTACTACCTCAAC
GCTAATGGTGATATGGCGACAGGATGGCTCCAATACAACGGTTCATGGTATTACCTCAAC
GCTAATGGTGATATGGCGACAGGATGGGCTAAAGTCAACGGTTCATGGTACTACCTAAAC
GCTAACGGTGCTATGGCTACAGGTTGGGCTAAAGTCAACGGTTCATGGTACTACCTAAAC
GCTAACGGTTCAATGGCAACAGGTTGGGTGAAAGATGGAGATACCTGGTACTATCTTGAA
GCATCAGGTGCTATGAAAGCAAGCCAATGGTTCAAAGTATCAGATAAATGGTACTATGTC
AATGGCTTAGGTGCCCTTGCAGTCAACACAACTGTAGATGGCTATAAAGTCAATGCCAAT
GGTGAATGGGTTTAA
>vaccine3~~~pspC_cbpA_CGSP14~~~63~~~[Streptococcus_pneumoniae CGSP14]
ATGTTTGCATCAAAAAGCGAAAGAAAAGTACATTATTCAATTCGTAAATTTAGTATTGGA
GTAGCTAGTGTAGCTGTTGCCAGTCTTTTTATGGGAAGTGTGGTTCATGCGACAGAGAAA
GAGGGAAGTACCCAAGCAGCCACTTCTTCTAATATGGCAAAGACAGAACATAGGAAAGCT
GCTAAACAATTCGATGAATATATAAACAAAATGATCCAATTAGATAGAAGAAAAGATACC
CAAAATCGCACCTTAATCATAAAGTTGAGCGCAATTAAAACGAAGTATTTGCGTGAATTA
AATGTTTTAGAAGAGAAGTCGAAAGATGAGTTGCCGCCAAAAATAAAAGAAGAGTTAACC
GCAGCTTTTGAGCAGTTTAAAAAAGATACATTACCAACAGAACCAGGAAAAAAGGTAGCA
GAAGCTAAGAAGAAGGTTGAAGAAGCTGAGAAGAAGGTAGCAGAAGCTAAGAAAAAAGCC
AAGGCTCAAAAAGAAGAAGATTACCGTAACTACCCAACCATTACTTACAAAACGCTTGAA
CTTGAAATTGCTGAGTTCGATGTGAAAGTTAAAGAAGCGGAGCTTGAACTAGTAAAAAAG
GAAGCTGACGAATCTCGAAACGAGGGCACAATTAACCAAGCAAAAGCGAAAGTTGAGAGT
GAAAAAGCTGAGGCTACAAGGTTAAAAAAAATCAAGACAGATCGTGAAAAAGCAGAAGAA
GAAGCTAAACGAAGAGCAGATGCTAAAGAGCAAGATGAATCAAAGAGGCGAAAGAGTCGG
GTAAAACGAGGAGATCTTGGAGAGCAAGCAACACCTGATAAAAAAGAAAATGATGCGAAG
TCTTCAGATTCTAGCGTAGGTGAAGAAACTCTTCCAAGCCCATCCCTGAAACCAGGAAAA
AAGGTAGCAGAAGCTCAGAAGAAGGTTGAAGAAGCTAAGAAAAAAGCCAAGGATCAAAAA
GAAGAAGATCGCCGTAACTACCCAACCAATACTTACAAAACGCTTGAACTTGAAATTGCT
GAGTCCGATGTGAAAGTTAAAGAAGCGGAGCTTGAACTAGTAAAAGAGGAAGCTAAGGAA
TCTCAAAACGAGGAAAAAATTAAGCAAGCAAAAGCGAAAGTTGAGAGTAAAAAAGCTGAG
GCTACAAGGTTAGAAAACATCAAGACAGATCGTAAAAAAGCAGAAGAAGAAGCTAAACGA
AAAGCAGCAGAAGAAGATAAAGTTAAAGAAAAACCAGCTGAACAACCACAACCAGCGCCG
GCTCCTCAACCAGAAAAACCAGCTCCAAAACCAGAGAATCCAGCTGAACAACCAAAAGCA
GAAAAACCAGCTGATCAACAAGCTGAAGAAGACTATGCTCGTAGATCAGAAGAAGAATAT
AATCGCTTGACTCAACAGCAACCGCCAAAAACTGAAAAACCAGCACAACCATCTACTCCA
AAAACAGGCTGGAAACAAGAAAACGGTATGTGGTACTTCTACAATACTGATGGTTCAATG
GCGACAGGATGGCTCCAAAACAATGGTTCATGGTACTACCTCAACAGCAATGGCGCTATG
GCGACAGGATGGCTCCAAAACAATGGTTCATGGTACTATCTAAACGCTAATGGTTCAATG
GCGACAGGATGGTTCCAATACAATGGTTCATGGTACTACCTCAACGCTAATGGTGATATG
GCGACAGGATGGCTCCAATACAATGGTTCATGGTACTACCTCAACGCTAATGGTGATATG
GCGACAGGATGGCTCCAATACAATGGTTCATGGTACTACCTCAACGCTAATGGTGATATG
GCGACAGGATGGCTCCAATACAATGGTTCATGGTACTACCTCAACGCTAATGGTGATATG
GCGACAGGATGGCTCCAATACAATGGTTCATGGTACTACCTCAACGCTAATGGTGATATG
GCGACAGGATGGCTCCAATACAATGGTTCATGGTACTACCTCAACGCTAACGGTTCAATG
GCAACAGATTGGGTGAAAGATGGAGATACCTGGTACTATCTTGAAGCATCAGGTGCTATG
AAAGCAAGCCAATGGTTCAAAGTATCAGATAAATGGTACTATGTCAATGGCTTAGGTGCC
CTTGCAGTCAACACAACTGTAGATGGCTATAGAGTCAATGCCAATGGTGAATGGGTAAAC
TAA
>vaccine3~~~pspC_cbpA_D39~~~64~~~[Streptococcus_pneumoniae D39]
ATGTTTGCATCAAAAAGCGAAAGAAAAGTACATTATTCAATTCGTAAATTTAGTATTGGA
GTAGCTAGTGTAGCTGTTGCCAGTCTTGTTATGGGAAGTGTGGTTCATGCGACAGAGAAC
GAGGGAAGTACCCAAGCAGCCACTTCTTCTAATATGGCAAAGACAGAACATAGGAAAGCT
GCTAAACAAGTCGTCGATGAATATATAGAAAAAATGTTGAGGGAGATTCAACTAGATAGA
AGAAAACATACCCAAAATGTCGCCTTAAACATAAAGTTGAGCGCAATTAAAACGAAGTAT
TTGCGTGAATTAAATGTTTTAGAAGAGAAGTCGAAAGATGAGTTGCCGTCAGAAATAAAA
GCAAAGTTAGACGCAGCTTTTGAGAAGTTTAAAAAAGATACATTGAAACCAGGAGAAAAG
GTAGCAGAAGCTAAGAAGAAGGTTGAAGAAGCTAAGAAAAAAGCCGAGGATCAAAAAGAA
GAAGATCGTCGTAACTACCCAACCAATACTTACAAAACGCTTGAACTTGAAATTGCTGAG
TTCGATGTGAAAGTTAAAGAAGCGGAGCTTGAACTAGTAAAAGAGGAAGCTAAAGAATCT
CGAAACGAGGGCACAATTAAGCAAGCAAAAGAGAAAGTTGAGAGTAAAAAAGCTGAGGCT
ACAAGGTTAGAAAACATCAAGACAGATCGTAAAAAAGCAGAAGAAGAAGCTAAACGAAAA
GCAGATGCTAAGTTGAAGGAAGCTAATGTAGCGACTTCAGATCAAGGTAAACCAAAGGGG
CGGGCAAAACGAGGAGTTCCTGGAGAGCTAGCAACACCTGATAAAAAAGAAAATGATGCG
AAGTCTTCAGATTCTAGCGTAGGTGAAGAAACTCTTCCAAGCTCATCCCTGAAATCAGGA
AAAAAGGTAGCAGAAGCTGAGAAGAAGGTTGAAGAAGCTGAGAAAAAAGCCAAGGATCAA
AAAGAAGAAGATCGCCGTAACTACCCAACCAATACTTACAAAACGCTTGACCTTGAAATT
GCTGAGTCCGATGTGAAAGTTAAAGAAGCGGAGCTTGAACTAGTAAAAGAGGAAGCTAAG
GAACCTCGAGACGAGGAAAAAATTAAGCAAGCAAAAGCGAAAGTTGAGAGTAAAAAAGCT
GAGGCTACAAGGTTAGAAAACATCAAGACAGATCGTAAAAAAGCAGAAGAAGAAGCTAAA
CGAAAAGCAGCAGAAGAAGATAAAGTTAAAGAAAAACCAGCTGAACAACCACAACCAGCG
CCGGCTACTCAACCAGAAAAACCAGCTCCAAAACCAGAGAAGCCAGCTGAACAACCAAAA
GCAGAAAAAACAGATGATCAACAAGCTGAAGAAGACTATGCTCGTAGATCAGAAGAAGAA
TATAATCGCTTGACTCAACAGCAACCGCCAAAAACTGAAAAACCAGCACAACCATCTACT
CCAAAAACAGGCTGGAAACAAGAAAACGGTATGTGGTACTTCTACAATACTGATGGTTCA
ATGGCAACAGGATGGCTCCAAAACAACGGTTCATGGTACTATCTAAACGCTAATGGTGCT
ATGGCGACAGGATGGCTCCAAAACAATGGTTCATGGTACTATCTAAACGCTAATGGTTCA
ATGGCAACAGGATGGCTCCAAAACAATGGTTCATGGTACTACCTAAACGCTAATGGTGCT
ATGGCGACAGGATGGCTCCAATACAATGGTTCATGGTACTACCTAAACAGCAATGGCGCT
ATGGCGACAGGATGGCTCCAATACAATGGCTCATGGTACTACCTCAACGCTAATGGTGAT
ATGGCGACAGGATGGCTCCAAAACAACGGTTCATGGTACTACCTCAACGCTAATGGTGAT
ATGGCGACAGGATGGCTCCAATACAACGGTTCATGGTATTACCTCAACGCTAATGGTGAT
ATGGCGACAGGTTGGGTGAAAGATGGAGATACCTGGTACTATCTTGAAGCATCAGGTGCT
ATGAAAGCAAGCCAATGGTTCAAAGTATCAGATAAATGGTACTATGTCAATGGCTCAGGT
GCCCTTGCAGTCAACACAACTGTAGATGGCTATGGAGTCAATGCCAATGGTGAATGGGTA
AACTAA
>vaccine3~~~pspC_cbpA_Hungary19A_6~~~65~~~[Streptococcus_pneumoniae Hungary19A_6]
ATGTTTGCATCAAAAAGCGAAAGAAAAGTACATTATTCAATTCGTAAATTTAGTATTGGA
GTAGCTAGTGTAGTAGTTGCTAGCTTGTTCTTAGGAGGAGTAGTTCATGCAGAAGGGGTT
AGAAGTGGGGATACCCCCAAGGTTACATCTAGTGGGGATGAAGTCGAGTCGCATCTAAAA
AAAATATTGAGTGAGATCCAAACACAATTAGATAGAAAACGACATGCCAAAACTGTAGCG
CTAATTAACAAGTTGCAAGACATTAAGAGAACGTATTCGTATAAATTAAATGTTTTAGAA
GAGAAGCCGAAAGCTGAGTTGACGTCAAAAGCTAAAGCAGAGTTAGACGCAGCTTTTGAG
CAGTTTAAAAAAGAACCAGAACTTACTAAAAAAGTAGCAGAAGCTCAGAAGAAGGTTGAA
GAAGCTAAGAAAAAAGCCGAGGATCAAAAAGAAGAAGATTTCCGTAACTACCCAACCAAT
ACTTACAAAACAATCGAACTTGAAATTGCTGAGTCCGATGTGAAAGTTAAAGAAGCGGAG
CTTGAACTATTGAAAGAGGAAGCTAAGGAACATCGAGACGAGGGCACAATTAAGCAAGTA
GAAGAGAAAGTTAAGAGTGAAAAAGCTGAGGCTACAAGGTTAGAAGAAATCAAGACAGAT
CGTGAAGAAGCTAAACGAAAAGCAGATGCTAAGTTGAAGGAAGCTGTTGAAAAGAATGTA
GCGACTTCAGAGCAAGATAAACTAAAGGGGCGGAGAAAACGAGGAGTTCTTGGAGAGCCA
GCAACACCTGATAAAAAAGAAAATGATGCGAAGTCTTCAGATTCTAGCGTAGGTGAAGAA
ACTCTTCCAAGCCCATCCCTGAAACCAGAAAAAAAGGTTGCAGAAGCTGAGAAGAAGGTT
GAAGAAGCTAAGAAAAAAGCCGAGGATCAAAAAGAAGAAGATCGTCGTAACTACCCAACC
AATACTTACAAAACGCTTGAACTTGAAATTGCTGAGTCCGATGTGGAAGTTAAAAAAGCG
GAGCTTGAACTAGTAAAAGAGGAAGCTAAGGAACCTCAAAACGAGGAAAAAGTTAAGCAA
GCAAAAGCGGAAGTTGAGAGTAAACAAGCTGAGGCTACAAGGTTAGAAAAAATCAAGACA
GATCGTAAAAAAGCAGAAGAAGAAGCTAAACGAAAAGCAGCAGAAGAAGATAAAGTTAAA
GAAAAACCAGCTGAACAACCACAACCAGCGCCGGCTCCTCAACCAGAAAAACCAGCTCCA
AAACCAGAAAAACCAGCTCCAGCTCCAAAACCAGAGAATCCAGCTGAACAACCAAAAGCA
GAAAAACCAGCTGATCAACAAGCTGAAGAAGACTATGCTCGTAGATCAGAAGAAGAATAT
AATCGCTTGACTCAACAGCAACCGCCAAAAACTGAAAAACCAGCACAACCATCTACTCCA
AAAACAGGCTGGAAACAAGAAAATGGTATGTGGTACTTCTACAATACTGATGGTTCAATG
GCGACAGGATGGCTCCAAAACAATGGCTCATGGTACTACCTCAACAGCAATGGCGCTATG
GCGACAGGATGGCTCCAAAACAATGGTTCATGGTACTATCTAAACGCTAATGGTTCAATG
GCAACAGGATGGCTCCAAAACAATGGTTCATGGTACTACCTCAACGCTAATGGTTCAATG
GCGACAGGATGGCTCCAATACAATGGTTCATGGTACTACCTCAACGCTAATGGTGATATG
GCGACAGGATGGCTCCAAAACAATGGCTCATGGTACTACCTAAACGCTAATGGTGATATG
GCGACAGGATGGCTCCAAAACAATGGCTCATGGTACTACCTAAACGCTAATGGTGATATG
GCGACAGGATGGCTCCAATACAATGGCTCATGGTACTACCTAAACGCTAATGGTGATATG
GCGACAGGTTGGGTGAAAGATGGAGATACCTGGTACTATCTTGAAGCATCAGGTGCTATG
AAAGCAAGCCAATGGTTCAAAGTATCAGATAAATGGTACTATGTCAATGGCTCAGGTGCC
CTTGCAGTCAACACAACTGTAGATGGCTATGGAGTCAATGCCAATGGTGAATGGGTAAAC
TAA
>vaccine3~~~pspC_cbpA_R6~~~66~~~[Streptococcus_pneumoniae R6]
ATGTTTGCATCAAAAAGCGAAAGAAAAGTACATTATTCAATTCGTAAATTTAGTATTGGA
GTAGCTAGTGTAGCTGTTGCCAGTCTTGTTATGGGAAGTGTGGTTCATGCGACAGAGAAC
GAGGGAAGTACCCAAGCAGCCACTTCTTCTAATATGGCAAAGACAGAACATAGGAAAGCT
GCTAAACAAGTCGTCGATGAATATATAGAAAAAATGTTGAGGGAGATTCAACTAGATAGA
AGAAAACATACCCAAAATGTCGCCTTAAACATAAAGTTGAGCGCAATTAAAACGAAGTAT
TTGCGTGAATTAAATGTTTTAGAAGAGAAGTCGAAAGATGAGTTGCCGTCAGAAATAAAA
GCAAAGTTAGACGCAGCTTTTGAGAAGTTTAAAAAAGATACATTGAAACCAGGAGAAAAG
GTAGCAGAAGCTAAGAAGAAGGTTGAAGAAGCTAAGAAAAAAGCCGAGGATCAAAAAGAA
GAAGATCGTCGTAACTACCCAACCAATACTTACAAAACGCTTGAACTTGAAATTGCTGAG
TTCGATGTGAAAGTTAAAGAAGCGGAGCTTGAACTAGTAAAAGAGGAAGCTAAAGAATCT
CGAAACGAGGGCACAATTAAGCAAGCAAAAGAGAAAGTTGAGAGTAAAAAAGCTGAGGCT
ACAAGGTTAGAAAACATCAAGACAGATCGTAAAAAAGCAGAAGAAGAAGCTAAACGAAAA
GCAGATGCTAAGTTGAAGGAAGCTAATGTAGCGACTTCAGATCAAGGTAAACCAAAGGGG
CGGGCAAAACGAGGAGTTCCTGGAGAGCTAGCAACACCTGATAAAAAAGAAAATGATGCG
AAGTCTTCAGATTCTAGCGTAGGTGAAGAAACTCTTCCAAGCTCATCCCTGAAATCAGGA
AAAAAGGTAGCAGAAGCTGAGAAGAAGGTTGAAGAAGCTGAGAAAAAAGCCAAGGATCAA
AAAGAAGAAGATCGCCGTAACTACCCAACCAATACTTACAAAACGCTTGACCTTGAAATT
GCTGAGTCCGATGTGAAAGTTAAAGAAGCGGAGCTTGAACTAGTAAAAGAGGAAGCTAAG
GAACCTCGAGACGAGGAAAAAATTAAGCAAGCAAAAGCGAAAGTTGAGAGTAAAAAAGCT
GAGGCTACAAGGTTAGAAAACATCAAGACAGATCGTAAAAAAGCAGAAGAAGAAGCTAAA
CGAAAAGCAGCAGAAGAAGATAAAGTTAAAGAAAAACCAGCTGAACAACCACAACCAGCG
CCGGCTACTCAACCAGAAAAACCAGCTCCAAAACCAGAGAAGCCAGCTGAACAACCAAAA
GCAGAAAAAACAGATGATCAACAAGCTGAAGAAGACTATGCTCGTAGATCAGAAGAAGAA
TATAATCGCTTGACTCAACAGCAACCGCCAAAAACTGAAAAACCAGCACAACCATCTACT
CCAAAAACAGGCTGGAAACAAGAAAACGGTATGTGGTACTTCTACAATACTGATGGTTCA
ATGGCAACAGGATGGCTCCAAAACAACGGTTCATGGTACTATCTAAACGCTAATGGTGCT
ATGGCGACAGGATGGCTCCAAAACAATGGTTCATGGTACTATCTAAACGCTAATGGTTCA
ATGGCAACAGGATGGCTCCAAAACAATGGTTCATGGTACTACCTAAACGCTAATGGTGCT
ATGGCGACAGGATGGCTCCAATACAATGGTTCATGGTACTACCTAAACAGCAATGGCGCT
ATGGCGACAGGATGGCTCCAATACAATGGCTCATGGTACTACCTCAACGCTAATGGTGAT
ATGGCGACAGGATGGCTCCAAAACAACGGTTCATGGTACTACCTCAACGCTAATGGTGAT
ATGGCGACAGGATGGCTCCAATACAACGGTTCATGGTATTACCTCAACGCTAATGGTGAT
ATGGCGACAGGTTGGGTGAAAGATGGAGATACCTGGTACTATCTTGAAGCATCAGGTGCT
ATGAAAGCAAGCCAATGGTTCAAAGTATCAGATAAATGGTACTATGTCAATGGCTCAGGT
GCCCTTGCAGTCAACACAACTGTAGATGGCTATGGAGTCAATGCCAATGGTGAATGGGTA
AACTAA
>vaccine3~~~pspC_cbpA_TIGR4~~~67~~~[Streptococcus_pneumoniae TIGR4]
ATGTTTGCATCAAAAAGCGAAAGAAAAGTACATTATTCAATTCGTAAATTTAGTGTTGGA
GTAGCTAGTGTAGTTGTTGCCAGTCTTGTTATGGGAAGTGTGGTTCATGCGACAGAGAAC
GAGGGAGCTACCCAAGTACCCACTTCTTCTAATAGGGCAAATGAAAGTCAGGCAGAACAA
GGAGAACAACCTAAAAAACTCGATTCAGAACGAGATAAGGCAAGGAAAGAGGTCGAGGAA
TATGTAAAAAAAATAGTGGGTGAGAGCTATGCAAAATCAACTAAAAAGCGACATACAATT
ACTGTAGCTCTAGTTAACGAGTTGAACAACATTAAGAACGAGTATTTGAATAAAATAGTT
GAATCAACCTCAGAAAGCCAACTACAGATACTGATGATGGAGAGTCGATCAAAAGTAGAT
GAAGCTGTGTCTAAGTTTGAAAAGGACTCATCTTCTTCGTCAAGTTCAGACTCTTCCACT
AAACCGGAAGCTTCAGATACAGCGAAGCCAAACAAGCCGACAGAACCAGGAGAAAAGGTA
GCAGAAGCTAAGAAGAAGGTTGAAGAAGCTGAGAAAAAAGCCAAGGATCAAAAAGAAGAA
GATCGTCGTAACTACCCAACCATTACTTACAAAACGCTTGAACTTGAAATTGCTGAGTCC
GATGTGGAAGTTAAAAAAGCGGAGCTTGAACTAGTAAAAGTGAAAGCTAACGAACCTCGA
GACGAGCAAAAAATTAAGCAAGCAGAAGCGGAAGTTGAGAGTAAACAAGCTGAGGCTACA
AGGTTAAAAAAAATCAAGACAGATCGTGAAGAAGCAGAAGAAGAAGCTAAACGAAGAGCA
GATGCTAAAGAGCAAGGTAAACCAAAGGGGCGGGCAAAACGAGGAGTTCCTGGAGAGCTA
GCAACACCTGATAAAAAAGAAAATGATGCGAAGTCTTCAGATTCTAGCGTAGGTGAAGAA
ACTCTTCCAAGCCCATCCCTGAAACCAGAAAAAAAGGTAGCAGAAGCTGAGAAGAAGGTT
GAAGAAGCTAAGAAAAAAGCCGAGGATCAAAAAGAAGAAGATCGCCGTAACTACCCAACC
AATACTTACAAAACGCTTGAACTTGAAATTGCTGAGTCCGATGTGGAAGTTAAAAAAGCG
GAGCTTGAACTAGTAAAAGAGGAAGCTAAGGAACCTCGAAACGAGGAAAAAGTTAAGCAA
GCAAAAGCGGAAGTTGAGAGTAAAAAAGCTGAGGCTACAAGGTTAGAAAAAATCAAGACA
GATCGTAAAAAAGCAGAAGAAGAAGCTAAACGAAAAGCAGCAGAAGAAGATAAAGTTAAA
GAAAAACCAGCTGAACAACCACAACCAGCGCCGGCTCCAAAAGCAGAAAAACCAGCTCCA
GCTCCAAAACCAGAGAATCCAGCTGAACAACCAAAAGCAGAAAAACCAGCTGATCAACAA
GCTGAAGAAGACTATGCTCGTAGATCAGAAGAAGAATATAATCGCTTGACTCAACAGCAA
CCGCCAAAAACTGAAAAACCAGCACAACCATCTACTCCAAAAACAGGCTGGAAACAAGAA
AACGGTATGTGGTACTTCTACAATACTGATGGTTCAATGGCGACAGGATGGCTCCAAAAC
AATGGCTCATGGTACTACCTCAACAGCAATGGCGCTATGGCGACAGGATGGCTCCAAAAC
AATGGTTCATGGTACTATCTAAACGCTAATGGTTCAATGGCAACAGGATGGCTCCAAAAC
AATGGTTCATGGTACTACCTAAACGCTAATGGTTCAATGGCGACAGGATGGCTCCAATAC
AATGGCTCATGGTACTACCTAAACGCTAATGGTTCAATGGCGACAGGATGGCTCCAATAC
AATGGCTCATGGTACTACCTAAACGCTAATGGTGATATGGCGACAGGTTGGGTGAAAGAT
GGAGATACCTGGTACTATCTTGAAGCATCAGGTGCTATGAAAGCAAGCCAATGGTTCAAA
GTATCAGATAAATGGTACTATGTCAATGGCTCAGGTGCCCTTGCAGTCAACACAACTGTA
GATGGCTATGGAGTCAATGCCAATGGTGAATGGGTAAACTAA
>vaccine3~~~rrgA_Hungary19A_6~~~68~~~[Streptococcus_pneumoniae Hungary19A_6]
ATGAAAAAAGTAAGAAAGATATTTCAGAAGGCAGTTGCAGGACTGTGCTGTATATCTCAG
TTGACAGCTTTTTCTTCGATAGTTGCTTTAGCAGAAACGCCTGAAACCAGTCCAGCGATA
GGAAAAGTAGTGATTAAGGAGACAGGCGAAGGAGGAGCGCTTCTAGGAGATGCCGTCTTT
GAGTTGAAAAACAATACGGATGGCACAACTGTTTCGCAAAGGACAGAGGCGCAAACAGGA
GAAGCGATATTTTCAAACATAAAACCTGGGACATACACCTTGACAGAAGCCCAACCTCCA
GTTGGTTATAAACCCTCTACTAAACAATGGACTGTTGAAGTTGAGAAGAATGGTCGGACG
ACTGTCCAAGGTGAACAGGTAGAAAATCGAGAAGAGGCTCTATCTGACCAGTATCCACAA
ACAGGGACTTATCCAGATGTTCAAACACCTTATCAGATTATTAAGGTAGATGGTTCGGAA
AAAAACGGACAGCACAAGGCGTTGAATCCGAATCCATATGAACGTGTGATTCCAGAAGGT
ACACTTTCAAAGAGAATTTATCAAGTGAATAATTTGGATGATAACCAATATGGAATCGAG
TTGACGGTTAGTGGTAAAACGACGGTTGAAACGAAAGAAGCCTCTACTCCGCTAGATGTT
GTTATTCTATTAGATAACTCCAATAGTATGAGTAATATTCGACATAATCATGCCCATCGA
GCGGAAAAAGCGGGAGAAGCGACACGAGCCCTTGTAGATAAGATTACCTCCAATCCAGAT
AATCGAGTAGCACTTGTGACTTATGGCTCAACTATCTTTGACGGTTCAGAAGCTACTGTG
GAAAAAGGGGTAGCAGATGCGAACGGAAAAATATTGAATGACTCAGCTTTATGGACGTTC
GATCGTACGACGTTTACAGCTAAAACTTATAATTATAGCTTTTTAAATCTCACATCAGAT
CCTACTGATATTCAAACTATTAAGGATAGGATTCCATCAGATGCAGAGGAATTGAACAAA
GACAAATTGATGTATCAATTCGGCGCGACTTTTACCCAGAAGGCTTTGATGACCGCTGAT
GATATCTTGACAAAGCAGGCAAGACCAAACAGTAAAAAGGTTATTTTCCACATTACAGAT
GGTGTTCCGACTATGTCATATCCAATTAATTTTAAATATACAGGAACGACGCAATCGTAC
AGAACTCAGCTGAATAATTTTAAAGCAAAAACTCCAAATAGTAGCGGGATATTACTGGAG
GACTTTGTTACATGGTCAGCAGATGGTGAACATAAGATTGTTCGTGGAGATGGTGAAAGT
TATCAGATGTTTACGAAGAAACCTGTAACAGACCAATACGGAGTTCATCAAATACTTTCA
ATCACCTCCATGGAGCAGAGAGCTAAATTAGTTTCAGCGGGATATAGGTTCTATGGAACT
GACTTGTATTTATATTGGCGTGATAGTATTCTAGCCTATCCATTTAACTCTAGTACCGAT
TGGATTACCAACCATGGTGACCCTACGACTTGGTATTATAACGGAAATATGGCTCAGGAT
GGCTATGATGTCTTCACTGTTGGGGTTGGTGTAAACGGGGATCCTGGTACGGATGAAGCA
ACGGCTACTAGATTTATGCAGAGCATCTCTAGTTCTCCTGACAACTACACTAACGTAGCA
GATCCATCTCAGATTTTACAAGAATTGAATCGCTACTTCTATACTATCGTCAATGAGAAG
AAATCTATCGAAAATGGTACGATTACAGACCCGATGGGTGAACTAATTGATTTCCAATTG
GGAGCAGATGGAAGGTTTGATCCAGCGGATTACACTTTAACTGCAAACGATGGTAGTTCG
TTGGTGAATAATGTCCCTACTGGGGGACCACAAAATGATGGTGGCTTGCTAAAAAATGCA
AAAGTGTTCTATGATACGACTGAGAAAAGGATTCGTGTAACAGGTTTGTACCTTGGAACG
GGTGAAAAAGTTACATTGACTTATAATGTTCGCTTGAATGACCAATTTGTAAGCAATAAA
TTCTATGACACGAATGGTCGAACAACCCTACACCCTAAGGAAGTAGAAAAGAACACAGTG
CGCGACTTCCCGATTCCTAAGATTCGTGATGTACGAAAGTATCCAGAAATCACAATTCCA
AAAGAGAAAAAACTTGGTGAAATTGAGTTTATTAAGATCAATAAGAATGATAAAAAACCA
CTGAGAGATGCGGTCTTTAGTCTTCAAAAACAACATCCGGATTATCCAGATATTTATGGA
GCTATTGATCAAAATGGCACTTATCAAAATGTGAGAACAGGTGAAGATGGTAAGTTGACC
TTTAAAAATCTGTCAGATGGGAAATATCGATTATTTGAAAATTCTGAACCAGCTGGTTAT
AAACCCGTTCAAAATAAGCCTATCGTTGCCTTCCAAATAGTAAATGGAGAAGTCAGAGAT
GTGACTTCAATCGTTCCACAAGATATACCAGCGGGTTACGAGTTTACGAATGATAAGCAC
TATATCACAAATGAGCCAATTCCTCCAAAAAGAGAATATCCTCGAACTGGTGGTATCGGA
ATGTTGCCATTCTATCTGATAGGTTGCATGATGATGGGAGGAGTTCTATTATACACACGG
AAAAATCCGTAA
>vaccine3~~~rrgA_TIGR4~~~69~~~[Streptococcus_pneumoniae TIGR4]
ATGCTTAACAGGGAGACACACATGAAAAAAGTAAGAAAGATATTTCAGAAGGCAGTTGCA
GGACTGTGCTGTATATCTCAGTTGACAGCTTTTTCTTCGATAGTTGCTTTAGCAGAAACG
CCTGAAACCAGTCCAGCGATAGGAAAAGTAGTGATTAAGGAGACAGGCGAAGGAGGAGCG
CTTCTAGGAGATGCCGTCTTTGAGTTGAAAAACAATACGGATGGCACAACTGTTTCGCAA
AGGACAGAGGCGCAAACAGGAGAAGCGATATTTTCAAACATAAAACCTGGGACATACACC
TTGACAGAAGCCCAACCTCCAGTTGGTTATAAACCCTCTACTAAACAATGGACTGTTGAA
GTTGAGAAGAATGGTCGGACGACTGTCCAAGGTGAACAGGTAGAAAATCGAGAAGAGGCT
CTATCTGACCAGTATCCACAAACAGGGACTTATCCAGATGTTCAAACACCTTATCAGATT
ATTAAGGTAGATGGTTCGGAAAAAAACGGACAGCACAAGGCGTTGAATCCGAATCCATAT
GAACGTGTGATTCCAGAAGGTACACTTTCAAAGAGAATTTATCAAGTGAATAATTTGGAT
GATAACCAATATGGAATCGAATTGACGGTTAGTGGGAAAACAGTGTATGAACAAAAAGAT
AAGTCTGTGCCGCTGGATGTCGTTATCTTGCTCGATAACTCAAATAGTATGAGTAACATT
CGAAACAAGAATGCTCGACGTGCGGAAAGAGCTGGTGAGGCGACACGTTCTCTTATTGAT
AAAATTACATCTGATTCAGAAAATAGGGTAGCGCTTGTGACTTATGCTTCCACTATCTTT
GATGGGACCGAGTTTACAGTAGAAAAAGGGGTAGCAGATAAAAACGGAAAGCGATTGAAT
GATTCTCTTTTTTGGAATTATGATCAGACGAGTTTTACAACCAATACCAAAGATTATAGT
TATTTAAAGCTGACTAATGATAAGAATGACATTGTAGAATTAAAAAATAAGGTACCTACC
GAGGCAGAAGACCATGATGGAAATAGATTGATGTACCAATTCGGTGCCACTTTTACTCAG
AAAGCTTTGATGAAGGCAGATGAGATTTTGACACAACAAGCGAGACAAAATAGTCAAAAA
GTCATTTTCCATATTACGGATGGTGTCCCAACTATGTCGTATCCGATTAATTTTAATCAT
GCTACGTTTGCTCCATCATATCAAAATCAACTAAATGCATTTTTTAGTAAATCTCCTAAT
AAAGATGGAATACTATTAAGTGATTTTATTACGCAAGCAACTAGTGGAGAACATACAATT
GTACGCGGAGATGGGCAAAGTTACCAGATGTTTACAGATAAGACAGTTTATGAAAAAGGT
GCTCCTGCAGCTTTCCCAGTTAAACCTGAAAAATATTCTGAAATGAAGGCGGCTGGTTAT
GCAGTTATAGGCGATCCAATTAATGGTGGATATATTTGGCTTAATTGGAGAGAGAGTATT
CTGGCTTATCCGTTTAATTCTAATACTGCTAAAATTACCAATCATGGTGACCCTACAAGA
TGGTACTATAACGGGAATATTGCTCCTGATGGGTATGATGTCTTTACGGTAGGTATTGGT
ATTAACGGAGATCCTGGTACGGATGAAGCAACGGCTACTAGTTTTATGCAAAGTATTTCT
AGTAAACCTGAAAACTATACCAATGTTACTGACACGACAAAAATATTGGAACAGTTGAAT
CGTTATTTCCACACCATCGTAACTGAAAAGAAATCAATTGAGAATGGTACGATTACAGAT
CCGATGGGTGAGTTAATTGATTTGCAATTGGGCACAGATGGAAGATTTGATCCAGCAGAT
TACACTTTAACTGCAAACGATGGTAGTCGCTTGGAGAATGGACAAGCTGTAGGTGGTCCA
CAAAATGATGGTGGTTTGTTAAAAAATGCAAAAGTGCTCTATGATACGACTGAGAAAAGG
ATTCGTGTAACAGGTCTGTACCTTGGAACGGATGAAAAAGTTACGTTGACCTACAATGTT
CGTTTGAATGATGAGTTTGTAAGCAATAAATTTTATGATACCAATGGTCGAACAACCTTA
CATCCTAAGGAAGTAGAACAGAACACAGTGCGCGACTTCCCGATTCCTAAGATTCGTGAT
GTGCGGAAGTATCCAGAAATCACAATTTCAAAAGAGAAAAAACTTGGTGACATTGAGTTT
ATTAAGGTCAATAAAAATGATAAAAAACCACTGAGAGGTGCGGTCTTTAGTCTTCAAAAA
CAACATCCGGATTATCCAGATATTTATGGAGCTATTGATCAAAATGGCACTTATCAAAAT
GTGAGAACAGGTGAAGATGGTAAGTTGACCTTTAAAAATCTGTCAGATGGGAAATATCGA
TTATTTGAAAATTCTGAACCAGCTGGTTATAAACCCGTTCAAAATAAGCCTATCGTTGCC
TTCCAAATAGTAAATGGAGAAGTCAGAGATGTGACTTCAATCGTTCCACAAGATATACCA
GCGGGTTACGAGTTTACGAATGATAAGCACTATATTACCAATGAACCTATTCCTCCAAAG
AGAGAATATCCTCGAACTGGTGGTATCGGAATGTTGCCATTCTATCTGATAGGTTGCATG
ATGATGGGAGGAGTTCTATTATACACACGGAAACATCCGTAA
>vaccine3~~~rrgB_Hungary19A_6~~~69~~~[Streptococcus_pneumoniae Hungary19A_6]
ATGAAATCAATCAACAAATTTTTAACAATGCTTGCTGCCTTATTACTGACAGCGAGTAGC
CTGTTTTCAGCTGCAACAGTTTTTGCGGCGGACAATGTTAGTACAGCACCAGATGCTGTT
ACTAAAACTTTAACAATCCATAAGTTACTGCTCTCAGAAGATGATTTAAAGACTTGGGAT
ACAAACGGTCCTAAAGGATATGATGGAACTCAATCTAGTTTAAAAGATTTAACTGGAGTT
GTAGCTGAGGAAATTCCAAATGTATACTTTGAATTACAAAAGTATAATTTGACTGATGGT
AAGGAAAAAGAAAATCTTAAAGATGATAGTAAATGGACAACAGTTCATGGTGGTTTGACA
ACTAAAGATGGACTTAAAATTGAAACCAGTACTCTTAAAGGTGTGTATCGTATTCGTGAG
GATAGAACAAAGACTACCTATGTTGGTCCTAATGGGCAAGTATTAACAGGTTCAAAAGCC
GTACCTGCTCTTGTAACTCTTCCACTTGTTAACAATAATGGTACAGTAATTGATGCACAT
GTTTTCCCTAAAAATTCATATAATAAACCAGTTGTAGATAAAAGAATTGCTGATACTTTG
AATTATAACGATCAAAATGGTCTGTCTATCGGTACTAAAATCCCATATGTTGTTAATACA
ACAATTCCAAGTAATGCAACATTTGCAACTTCATTTTGGTCAGATGAAATGACAGAAGGT
CTAACTTATAATGAAGATGTAACAATTACTTTGAATAATGTAGCTATGGATCAAGCTGAT
TATGAAGTCACTAAAGGAATTAATGGCTTTAACTTAAAATTAACAGAAGCAGGTTTAGCT
AAAATTAATGGTAAGGATGCAGACCAAAAAATCCAAATTACTTACTCAGCTACTTTGAAC
TCACTTGCTGTTGCAGACATTCCTGAAAGTAACGATATTACATATCATTACGGAAATCAT
CAAGATCATGGGAATACTCCAAAACCAACTAAACCTAATAATGGTCAAATTACAGTAACT
AAGACATGGGACAGTCAACCTGCTCCTGAGGGGGTGAAAGCGACTGTTCAACTTGTAAAT
GCCAAGACTGGTGAGAAAGTCGGTGCTCCTGTAGAACTTTCAGAAAATAATTGGACATAT
ACTTGGAGTGGTCTAGATAATTCTATTGAATACAAAGTTGAAGAAGAATATAATGGATAC
TCAGCTGAATACACAGTAGAGAGCAAAGGGAAGTTGGGGGTAAAAAACTGGAAAGATAAT
AACCCAGCTCCAATCAATCCTGAAGAACCACGTGTAAAAACATACGGTAAAAAGTTTGTC
AAAGTAGACCAAAAAGATACTCGTCTAGAAAATGCGCAGTTCGTTGTTAAAAAAGCAGAT
AGCAATAAATATATTGCCTTTAAGTCAACTGCACAACAAGCTGCAGATGAAAAAGCAGCA
GCAACTGCAAAACAAAAATTGGATGCAGCGGTAGCAGCTTACACAAATGCTGCAGATAAG
CAAGCCGCTCAAGCTCTAGTAGATCAAGCACAGCAAGAATACAATGTAGCTTACAAAGAA
GCCAAATTTGGTTATGTTGAAGTAGCTGGAAAAGATGAAGCAATGGTTCTTACTTCTAAT
ACGGATGGTCAATTCCAAATTTCAGGTCTTGCTGCTGGTACTTATAAATTAGAAGAAATT
AAAGCTCCAGAAGGTTTTGCGAAAATTGATGATGTAGAATTTGTTGTTGGAGCAGGTTCT
TGGAATCAAGGTGAGTTTAATTACTTAAAAGATGTTCAAAAGAATGACGCTACAAAAGTA
GTCAACAAAAAAATCACTATCCCACAAACGGGTGGTATTGGTACAATTATCTTTGCTGTA
GCGGGGGCTGCGATTATGGGTATTGCAGTGTACGCATATGTTAAAAACAACAAAGATGAG
GATCAACTTGCTTAA
>vaccine3~~~rrgB_TIGR4~~~70~~~[Streptococcus_pneumoniae TIGR4]
ATGAAATCAATCAACAAATTTTTAACAATGCTTGCTGCCTTATTACTGACAGCGAGTAGC
CTGTTTTCAGCTGCAACAGTTTTTGCGGCTGGGACGACAACAACATCTGTTACCGTTCAT
AAACTATTGGCAACAGATGGGGATATGGATAAAATTGCAAATGAGTTAGAAACAGGTAAC
TATGCTGGTAATAAAGTGGGTGTTCTACCTGCAAATGCAAAAGAAATTGCCGGTGTTATG
TTCGTTTGGACAAATACTAATAATGAAATTATTGATGAAAATGGCCAAACTCTAGGAGTG
AATATTGATCCACAAACATTTAAACTCTCAGGGGCAATGCCGGCAACTGCAATGAAAAAA
TTAACAGAAGCTGAAGGAGCTAAATTTAACACGGCAAATTTACCAGCTGCTAAGTATAAA
ATTTATGAAATTCACAGTTTATCAACTTATGTCGGTGAAGATGGAGCAACCTTAACAGGT
TCTAAAGCAGTTCCAATTGAAATTGAATTACCATTGAACGATGTTGTGGATGCGCATGTG
TATCCAAAAAATACAGAAGCAAAGCCAAAAATTGATAAAGATTTCAAAGGTAAAGCAAAT
CCAGATACACCACGTGTAGATAAAGATACACCTGTGAACCACCAAGTTGGAGATGTTGTA
GAGTACGAAATTGTTACAAAAATTCCAGCACTTGCTAATTATGCAACAGCAAACTGGAGC
GATAGAATGACTGAAGGTTTGGCATTCAACAAAGGTACAGTGAAAGTAACTGTTGATGAT
GTTGCACTTGAAGCAGGTGATTATGCTCTAACAGAAGTAGCAACTGGTTTTGATTTGAAA
TTAACAGATGCTGGTTTAGCTAAAGTGAATGACCAAAACGCTGAAAAAACTGTGAAAATC
ACTTATTCGGCAACATTGAATGACAAAGCAATTGTAGAAGTACCAGAATCTAATGATGTA
ACATTTAACTATGGTAATAATCCAGATCACGGGAATACTCCAAAGCCGAATAAGCCAAAT
GAAAACGGCGATTTGACATTGACCAAGACATGGGTTGATGCTACAGGTGCACCAATTCCG
GCTGGAGCTGAAGCAACGTTCGATTTGGTTAATGCTCAGACTGGTAAAGTTGTACAAACT
GTAACTTTGACAACAGACAAAAATACAGTTACTGTTAACGGATTGGATAAAAATACAGAA
TATAAATTCGTTGAACGTAGTATAAAAGGGTATTCAGCAGATTATCAAGAAATCACTACA
GCTGGAGAAATTGCTGTCAAGAACTGGAAAGACGAAAATCCAAAACCACTTGATCCAACA
GAGCCAAAAGTTGTTACATATGGTAAAAAGTTTGTCAAAGTTAATGATAAAGATAATCGT
TTAGCTGGGGCAGAATTTGTAATTGCAAATGCTGATAATGCTGGTCAATATTTAGCACGT
AAAGCAGATAAAGTGAGTCAAGAAGAGAAGCAGTTGGTTGTTACAACAAAGGATGCTTTA
GATAGAGCAGTTGCTGCTTATAACGCTCTTACTGCACAACAACAAACTCAGCAAGAAAAA
GAGAAAGTTGACAAAGCTCAAGCTGCTTATAATGCTGCTGTGATTGCTGCCAACAATGCA
TTTGAATGGGTGGCAGATAAGGACAATGAAAATGTTGTGAAATTAGTTTCTGATGCACAA
GGTCGCTTTGAAATTACAGGCCTTCTTGCAGGTACATATTACTTAGAAGAAACAAAACAG
CCTGCTGGTTATGCATTACTAACTAGCCGTCAGAAATTTGAAGTCACTGCAACTTCTTAT
TCAGCGACTGGACAAGGCATTGAGTATACTGCTGGTTCAGGTAAAGATGACGCTACAAAA
GTAGTCAACAAAAAAATCACTATCCCACAAACGGGTGGTATTGGTACAATTATCTTTGCT
GTAGCGGGGGCTGCGATTATGGGTATTGCAGTGTACGCATATGTTAAAAACAACAAAGAT
GAGGATCAACTTGCTTAA
>vaccine3~~~rrgC_Hungary19A_6~~~71~~~[Streptococcus_pneumoniae Hungary19A_6]
ATGACCTTCCTTGAGAATCAGATTGAAGTATCTCATATTCCAAATGGTCTTTACTATGTT
CGCTCTATTATCCAGACGGATGCGGTTTCTTATCCAGCTGAATTTCTTTTTGAAATGACA
GATCAAACGGTAGAGCCTTTGGTCATTGTAGCGAAAAAAACAGATACAATGACAACAAAG
GTGAAGCTGATAAAGGTGGATCAAGACCACAATCGCTTGGAGGGTGTCGGCTTTAAATTG
GTATCAGTAGCAAGAGATGGTTCTGAAAAAGAGGTTCCCTTGATTGGAGAATACCGTTAC
AGTTCTTCTGGTCAAGTAGGGAGAACTCTCTATACTGATAAAAATGGAGAGATTTTTGTG
ACAAATCTTCCTCTTGGGAACTATCGTTTCAAGGAGGTGGAGCCACTGGCAGGCTATGCT
GTTACGACGCTGGATACGGATGTCCAGCTGGTAGATCATCAGCTGGTGACGATTACGGTT
GTCAATCAGAAATTACCACGTGGCAATGTTGACTTTATGAAGGTGGATGGTCGGACCAAT
ACCTCTCTTCAAGGGGCAATGTTCAAAGTCATGAAAGAAGAAAGCGGACACTATACTCCT
GTTCTTCAAAATGGTAAGGAAGTAGTTGTAACATCAGGGAAAGATGGTCGTTTCCGAGTG
GAAGGTCTAGAGTATGGGACATACTATTTATGGGAGCTCCAAGCTCCAACTGGTTATGTT
CAATTAACATCGCCTGTTTCCTTTACAATCGGGAAAGATACTCGTAAGGAACTGGTAACA
GTGGTTAAAAATAACAAGCGACCACGGATTGATGTGCCAGATACAGGGGAAGAAACCTTG
TATATCTTGATGCTTGTTGCCATTTTGTTGTTTGGTAGTGGTTATTATCTTACGAAAAAA
CCAAATAACTGA
>vaccine3~~~rrgC_TIGR4~~~72~~~[Streptococcus_pneumoniae TIGR4]
ATGATTAGTCGTATCTTCTTTGTTATGGCTCTGTGTTTTTCTCTTGTATGGGGTGCACAT
GCAGTCCAAGCGCAAGAAGATCACACGTTGGTCTTGCAATTGGAGAACTATCAGGAGGTG
GTTAGTCAATTGCCATCTCGTGATGGTCATCGGTTGCAAGTATGGAAGTTGGATGATTCG
TATTCCTATGATGATCGGGTGCAAATTGTAAGAGACTTGCATTCGTGGGATGAGAATAAA
CTTTCTTCTTTCAAAAAGACTTCGTTTGAGATGACCTTCCTTGAGAATCAGATTGAAGTA
TCTCATATTCCAAATGGTCTTTACTATGTTCGCTCTATTATCCAGACGGATGCGGTTTCT
TATCCAGCTGAATTTCTTTTTGAAATGACAGATCAAACGGTAGAGCCTTTGGTCATTGTA
GCGAAAAAAACAGATACAATGACAACAAAGGTGAAGCTGATAAAGGTGGATCAAGACCAC
AATCGCTTGGAGGGTGTCGGCTTTAAATTGGTATCAGTAGCAAGAGATGTTTCTGAAAAA
GAGGTTCCCTTGATTGGAGAATACCGTTACAGTTCTTCTGGTCAAGTAGGGAGAACTCTC
TATACTGATAAAAATGGAGAGATTTTTGTGACAAATCTTCCTCTTGGGAACTATCGTTTC
AAGGAGGTGGAGCCACTGGCAGGCTATGCTGTTACGACGCTGGATACGGATGTCCAGCTG
GTAGATCATCAGCTGGTGACGATTACGGTTGTCAATCAGAAATTACCACGTGGCAATGTT
GACTTTATGAAGGTGGATGGTCGGACCAATACCTCTCTTCAAGGGGCAATGTTCAAAGTC
ATGAAAGAAGAAAGCGGACACTATACTCCTGTTCTTCAAAATGGTAAGGAAGTAGTTGTA
ACATCAGGGAAAGATGGTCGTTTCCGAGTGGAAGGTCTAGAGTATGGGACATACTATTTA
TGGGAGCTCCAAGCTCCAACTGGTTATGTTCAATTAACATCGCCTGTTTCCTTTACAATC
GGGAAAGATACTCGTAAGGAACTGGTAACAGTGGTTAAAAATAACAAGCGACCACGGATT
GATGTGCCAGATACAGGGGAAGAAACCTTGTATATCTTGATGCTTGTTGCCATTTTGTTG
TTTGGTAGTGGTTATTATCTTACGAAAAAACCAAATAACTGA
>VFDBB~~~piaA~~~29~~~iron_compound_ABC_transporter Streptococcus pneumoniae_TIGR4
ATGAAAAACAAATTTTTTCTAATAGCTATTTTAGCTATGTGTATAGTTTTTAGCGCTTGT
TCTTCTAATTCTGTTAAAAATGAAGAAAATACTTCTAAAGAGCATGCGCCTGATAAAATA
GTTTTAGATCATGCTTTCGGTCAAACTATATTAGATAAAAAACCTGAAAGAGTTGCAACT
ATTGCTTGGGGAAATCATGATGTAGCATTAGCTTTAGGAATAGTTCCTGTTGGATTTTCA
AAAGCAAATTACGGTGTAAGTGCTGATAAAGGAGTTTTACCATGGACAGAAGAAAAAATC
AAAGAACTAAATGGTAAAGCTAACCTATTTGACGATTTGGATGGACTTAACTTTGAAGCA
ATATCAAATTCTAAACCAGATGTTATCTTAGCAGGTTATTCTGGTATAACTAAAGAAGAT
TATGACACTCTATCAAAAATTGCTCCTGTAGCAGCATACAAATCTAAACCTTGGCAAACT
TTATGGAGAGATATGATTAAAATTGATTCAAAAGCCTTAGGTATGGAAAAAGAAGGTGAT
GAGTTAATCAAAAATACTGAAGCTCGTATATCCAAAGAATTAGAAAAACATCCAGAAATC
AAAGGAAAAATCAAAGGAAAAAAAGTATTATTTACTATGATTAATGCTGCAGATACATCA
AAATTCTGGATTTATACTAGCAAAGATCCAAGAGCAAATTATTTAACAGATTTAGGTCTA
GTTTTCCCTGAATCATTAAAAGAATTTGAGAGTGAAGATAGTTTTGCAAAGGAAATTTCT
GCAGAAGAAGCAAATAAGATAAATGATGCTGATGTAATCATAACTTATGGTGATGATAAA
ACTCTTGAAGCTTTACAAAAAGATCCTCTTTTAGGTAAAATAAATGCAATTAAAAATGGT
GCCGTTGCTGTAATTCCAGATAATACACCGTTAGCAGCCTCATGCACTCCAACACCACTT
TCAATAAACTATACTATTGAAGAATACCTAAATCTTTTAGGAAATGCATGCAAAAATGCG
AAATAA
>VFDBB~~~zmpB~~~30~~~zinc_metalloprotease Streptococcus_pneumoniae_TIGR4
ATGGCTCCTTCTGTAGTGGACGCAGCCACCTATCACTATGTAAATAAAGAGATTATTTCA
CAAGAAGCTAAAGATTTAATTCAGACAGGAAAGCCTGACAGGAATGAAGTTGTATATGGT
TTGGTGTATCAAAAAGATCAGTTGCCTCAAACAGGGACAGAAGCATCTGTTTTGACAGCT
TTTGGTTTGCTGACTGTTGGGAGCTTGCTTTTAATCTACAAGAGAAAGAAAATTGCTAGC
GTCTTTCTAGTTGGAGCTATGGGATTGGTAGTTCTTCCTAGTGCAGGGGCTGTAGACCCA
GTTGCGACCCTAGCGCTGGCTAGTCGAGAGGGTGTTGTTGAAATGGAGGGCTATCGCTAT
GTTGGTTATCTATCAGGTGACATCCTCAAAACGCTTGGCTTGGACACTGTTTTAGAAGAA
ACCTCAGCAAAACCTGGAGAGGTGACTGTGGTCGAAGTTGAGACTCCTCAATCAATAACA
AATCAGGAGCAAGCTAGGACAGAAAACCAAGTAGTAGAGACAGAGGAAGCTCCAAAAGAA
GAAGCACCTAAAACAGAAGAAAGTCCAAAGGAAGAACCAAAATCGGAGGTAAAACCTACT
GACGACACCCTTCCTAAAGTAGAAGAGGGGAAAGAAGATTCAGCAGAACCAGCTCCAGTT
GAAGAAGTAGGTGGAGAAGTTGAGTCAAAACCAGAGGAAAAAGTAGCAGTTAAGCCAGAA
AGTCAACCATCAGACAAACCAGCTGAGGAATCAAAAGTTGAACAAGCAGGTGAACCAGTC
GCGCCAAGAGAAGACGAAAAGGCACCAGTCGAGCCAGAAAAGCAACCAGAAGCTCCTGAA
GAAGAGAAGGCTGTAGAGGAAACACCGAAACAAGAAGAGTCAACTCCAGATACCAAGGCT
GAAGAAACTGTAGAACCAAAAGAGGAGACTGTTAATCAATCTATTGAACAACCAAAAGTT
GAAACGCCTGCTGTAGAAAAACAAACAGAACCAACAGAGGAACCAAAAGTTGAACAAGCA
GGTGAACCAGTCGCGCCAAGAGAAGACGAACAGGCACCAACGGCACCAGTTGAGCCAGAA
AAGCAACCAGAAGTTCCTGAAGAAGAGAAGGCTGTAGAGGAAACACCGAAACCAGAAGAT
AAAATAAAGGGTATTGGTACTAAAGAACCAGTTGATAAAAGTGAGTTAAATAATCAAATT
GATAAAGCTAGTTCAGTTTCTCCTACTGATTATTCTACAGCAAGTTACAATGCTCTTGGA
CCTGTTTTAGAAACTGCAAAAGGTGTCTATGCTTCAGAGCCTGTAAAACAGCCTGAGGTA
AATAGCGAGACAAATAAACTTAAAACGGCTATTGACGCTCTAAACGTTGATAAAACTGAA
TTAAACAATACGATTGCAGATGCAAAAACAAAGGTAAAAGAACATTACAGTGATAGAAGT
TGGCAAAACCTCCAAACTGAAGTTACAAAGGCTGAAAAAGTTGCAGCTAATACAGATGCT
AAACAAAGTGAAGTTAACGAAGCTGTTGAAAAATTAACTGCAACTATTGAAAAATTGGTT
GAATTATCTGAAAAGCCAATATTAACATTGACTAGTACCGATAAGAAAATATTGGAACGT
GAAGCTGTTGCTAAGTATACTCTAGAAAATCAAAACAAAACAAAAATCAAATCAATCACA
GCTGAATTGAAAAAAGGAGAAGAAGTTATTAATACTGTAGTCCTTACAGATGACAAGGTA
ACAACAGAAACTATAAGCGCTGCATTTAAGAACCTAGAGTACTACAAAGAATACACCCTA
TCTACAACTATGATTTACGACAGAGGTAACGGTGAAGAAACTGAAACTCTAGAAAATCAA
AATATTCAATTAGATCTTAAAAAAGTTGAGCTTAAAAATATTAAACGTACAGATTTAATC
AAATACGAAAATGGAAAAGAAACTAATGAATCACTGATAACAACTATTCCTGATGATAAG
AGCAATTATTATTTAAAAATAACTTCAAATAATCAGAAAACTACATTACTAGCTGTTAAA
AATATAGAAGAAACTACGGTTAACGGAACACCTGTATATAAAGTTACAGCAATCGCAGAC
AATTTAGTCTCTAGAACTGCTGATAATAAATTTGAAGAAGAATACGTTCACTATATTGAA
AAACCTAAAGTCCACGAAGATAATGTATATTATAATTTCAAAGAATTAGTGGAAGCTATT
CAAAACGATCCTTCAAAAGAATATCGTCTGGGACAATCAATGAGCGCTAGAAATGTTGTT
CCTAATGGAAAATCATATATCACTAAAGAATTCACAGGAAAACTTTTAAGTTCTGAAGGA
AAACAATTTGCTATTACTGAATTGGAACATCCATTATTTAATGTGATAACAAACGCAACG
ATAAATAATGTGAATTTTGAAAATGTAGAGATAGAACGTTCTGGTCAAGATAATATTGCA
TCATTAGCCAATACTATGAAAGGTTCTTCAGTTATTACAAATGTCAAAATTACAGGCACA
CTTTCAGGTCGTAATAATGTTGCTGGATTTGTAAATAATATGAATGATGGAACTCGTATT
GAAAATGTTGCTTTCTTTGGCAAACTACACTCTACAAGTGGAAATGGCTCTCATACAGGG
GGAATTGCAGGTACAAACTATAGAGGAATTGTTAGAAAAGCATATGTTGATGCTACTATT
ACAGGAAACAAAACACGCGCCAGCTTGTTAGTTCCTAAAGTAGATTATGGATTAACTCTA
GACCATCTTATTGGTACAAAAGCTCTCCTAACTGAGTCGGTTGTAAAAGGTAAAATAGAT
GTTTCAAATCCAGTAGAAGTTGGAGCAATAGCAAGTAAGACTTGGCCTGTAGGTACGGTA
AGTAATTCTGTCAGCTATGCTAAGATTATCCGTGGAGAGGAGTTATTCGGCTCTAACGAC
GTTGATGATTCTGATTATGCTAGTGCTCATATAAAAGATTTATATGCGGTAGAGGGATAT
TCGTCAGGTAATAGATCATTTAGGAAATCTAAAACATTTACTAAATTAACTAAAGAACAA
GCTGATGCTAAAGTTACTACTTTCAATATTACTGCTGATAAATTAGAAAGTGATCTATCT
CCTCTTGCAAAACTTAATGAAGAAAAAGCCTATTCTAGTATTCAAGATTATAACGCTGAA
TATAACCAAGCCTATAAAAATCTTGAAAAATTAATACCATTCTACAATAAAGATTATATT
GTATATCAAGGTAATAAATTAAATAAAGAACACCATCTAAATACTAAAGAAGTTCTTTCT
GTTACCGCGATGAACAACAATGAGTTTATCACAAACCTAGATGAAGCTAATAAAATTATT
GTTCACTATGCGGACGGTACAAAAGATTACTTTAACTTGTCTTCTAGCAGTGAAGGTTTA
AGTAATGTAAAAGAATATACTATAACTGACTTAGGAATTAAATATACACCTAATATCGTT
CAAAAAGATAACACTACTCTTGTTAATGATATAAAATCTATTTTAGAATCAGTAGAGCTT
CAGTCTCAAACGATGTATCAGCATCTAAATCGATTAGGTGACTATAGAGTTAATGCAATC
AAAGATTTATATTTAGAAGAAAGCTTCACAGATGTTAAAGAAAACTTAACAAACCTAATC
ACAAAATTAGTTCAAAACGAAGAACATCAACTAAATGATTCTCCAGCTGCTCGTCAAATG
ATTCGTGATAAAGTCGAGAAAAACAAAGCAGCTTTATTACTAGGTTTAACTTACCTAAAT
CGTTACTATGGAGTTAAATTTGGTGATGTTAATATTAAAGAATTAATGCTATTCAAACCA
GATTTCTATGGTGAAAAAGTTAGCGTATTAGACAGATTAATTGAAATCGGTTCTAAAGAG
AACAACATTAAAGGTTCACGTACATTCGACGCATTCGGTCAAGTATTGGCTAAATATACT
AAATCAGGTAATTTAGATGCATTTTTAAATTATAATAGACAATTGTTCACAAATATAGAC
AATATGAACGATTGGTTTATTGATGCTACAGAAGACCATGTCTACATCGCAGAACGCGCT
TCTGAGGTCGAAGAAATTAAAAATTCTAAACATCGTGCATTCGATAATTTAAAACGAAGT
CACCTTAGAAATACTATACTCCCACTACTGAATATTGATAAAGCACATCTTTATTTAATT
TCAAATTATAATGCAATTGCCTTTGGTAGTGCAGAGCGATTAGGTAAAAAATCATTAGAA
GATATTAAAGATATCGTTAACAAAGCTGCAGATGGTTATAGAAACTATTATGATTTCTGG
TATCGTCTAGCGTCTGATAACGTTAAACAACGACTACTAAGAGATGCTGTTATTCCTATT
TGGGAAGGTTATAACGCTCCTGGTGGATGGGTTGAAAAATATGGCCGCTATAATACCGAC
AAAGTATATACTCCTCTTAGAGAATTCTTTGGTCCTATGGATAAGTATTATAATTATAAT
GGAACAGGAGCTTATGCTGCTATATATCCTAACTCTGATGATATTAGAACTGATGTAAAA
TATGTTCATTTAGAAATGGTTGGTGAATACGGTATTTCAGTTTACACACATGAAACAACA
CACGTCAACGACCGTGCGATTTACTTAGGTGGCTTTGGACACCGTGAAGGTACTGATGCT
GAAGCATATGCTCAGGGTATGCTACAAACTCCTGTTACTGGTAGTGGATTTGATGAGTTT
GGTTCTTTAGGTATTAATATGGTATTTAAACGCAAAAATGATGGGAATCAGTGGTATATT
ACAGATCCAAAAACTCTAAAAACACGAGAAGATATTAATAGATATATGAAGGGTTATAAT
GACACTTTAACTCTTCTTGATGAAATTGAGGCTGAATCTGTGATTTCTCAACAAAATAAA
GATTTAAATAGTGCATGGTTCAAAAAAATAGATAGAGAATACCGTGATAACAATAAATTA
AATCAATGGGATAAAATTCGAAATCTAAGTCAAGAAGAGAAAAATGAATTAAATATTCAA
TCTGTTAATGATTTAGTTGATCAACAATTAATGACTAATCGCAATCCAGGTAATGGTATC
TATAAACCCGAAGCAATTAGCTATAACGATCAATCACCTTATGTAGGTGTTAGAATGATG
ACCGGTATCTACGGAGGTAATACTAGTAAAGGTGCTCCTGGAGCTGTTTCATTCAAACAT
AATGCTTTTAGATTATGGGGTTACTACGGATACGAAAATGGGTTCTTAGGTTATGCTTCA
AATAAATATAAACAACAATCTAAAACAGATGGTGAGTCTGTTCTAAGTGATGAATATATT
ATCAAGAAAATATCTAACAATACATTTAATACTATTGAAGAATTTAAAAAAGCTTACTTC
AAAGAAGTTAAAGATAAAGCAACGAAAGGATTAACAACATTCGAAGTAAATGGTTCTTCC
GTTTCATCATACGATGATTTACTGACATTGTTTAAAGAAGCTGTTAAAAAAGATGCCGAA
ACTCTTAAACAAGAAGCAAACGGTAATAAAACAGTATCTATGAATAATACAGTTAAATTA
AAAGAAGCTGTTTATAAGAAACTTCTTCAACAAACAAATAGCTTTAAAACTTCAATCTTT
AAATAA
>VFDBB~~~tig_ropA~~~31~~~trigger_factor Streptococcus_pneumoniae_TIGR4
ATGTCTGTATCATTTGAAAACAAAGAAACAAACCGTGGTGTCTTGACTTTCACTATCTCT
CAAGACCAAATCAAACCAGAATTGGACCGTGTCTTCAAGTCAGTGAAGAAATCTCTTAAT
GTTCCAGGTTTCCGTAAAGGTCACCTTCCACGCCCTATCTTCGACCAAAAATTTGGTGAA
GAAGCTCTTTATCAAGATGCAATGAACGCACTTTTGCCAAACGCTTATGAAGCAGCTGTA
AAAGAAGCTGGTCTTGAAGTGGTTGCCCAACCAAAAATTGACGTAACTTCAATGGAAAAA
GGTCAAGACTGGGTTATCACTGCTGAAGTCGTTACAAAACCTGAAGTAAAATTGGGTGAC
TACAAAAACCTTGAAGTATCAGTTGATGTAGAAAAAGAAGTAACTGACGCTGATGTCGAA
GAGCGTATCGAACGCGAACGCAACAACCTGGCTGAATTGGTTATCAAGGAAGCTGCTGCT
GAAAACGGCGACACTGTTGTGATCGACTTCGTTGGTTCTATCGACGGTGTTGAATTTGAC
GGTGGAAAAGGTGAAAACTTCTCACTTGGACTTGGTTCAGGTCAATTCATCCCTGGTTTC
GAAGACCAATTGGTAGGTCACTCAGCTGGCGAAACCGTTGATGTTATCGTAACATTCCCA
GAAGACTACCAAGCAGAAGACCTTGCAGGTAAAGAAGCTAAATTCGTGACAACTATCCAC
GAAGTAAAAGCTAAAGAAGTTCCGGCTCTTGACGATGAACTTGCAAAAGACATTGATGAA
GAAGTTGAAACACTTGCTGACTTGAAAGAAAAATACAGCAAAGAATTGGCTGCTGCTAAA
GAAGAAGCTTACAAAGATGCAGTTGAAGGTGCAGCAATTGATACAGCTGTAGAAAATGCT
GAAATCGTAGAACTTCCAGAAGAAATGATCCATGAAGAAGTTCACCGTTCAGTAAATGAA
TTCCTTGGGAATTTGCAACGTCAAGGGATCAACCCTGACATGTACTTCCAAATCACTGGA
ACTACTCAAGAAGACCTTCACAACCAATACCAAGCAGAAGCTGAGTCACGTACTAAGACT
AACCTTGTTATCGAAGCAGTTGCCAAAGCTGAAGGATTTGATGCTTCAGAAGAAGAAATC
CAAAAAGAAGTTGAGCAATTGGCAGCAGACTACAACATGGAAGTTGCACAAGTTCAAAAC
TTGCTTTCAGCTGACATGTTGAAACATGATATCACTATCAAAAAAGCTGTTGAATTGATC
ACAAGCACAGCAACAGTAAAATAA
>VFDBB~~~htrA_degP~~~32~~~serine_protease Streptococcus_pneumoniae_TIGR4
ATGAAACATCTAAAAACATTTTACAAAAAATGGTTTCAATTATTAGTCGTTATCGTCATT
AGCTTTTTTAGTGGAGCCTTGGGTAGTTTTTCAATAACTCAACTAACTCAAAAAAGTAGT
GTAAACAACTCTAACAACAATAGTACTATTACACAAACTGCCTATAAGAACGAAAATTCA
ACAACACAGGCTGTTAACAAAGTAAAAGATGCTGTTGTTTCTGTTATTACTTATTCGGCA
AACAGACAAAATAGCGTATTTGGCAATGATGATACTGACACAGATTCTCAGCGAATCTCT
AGTGAAGGATCTGGAGTTATTTATAAAAAGAATGATAAAGAAGCTTACATCGTCACCAAC
AATCACGTTATTAATGGCGCCAGCAAAGTAGATATTCGATTGTCAGATGGGACTAAAGTA
CCTGGAGAAATTGTCGGAGCTGACACTTTCTCTGATATTGCTGTCGTCAAAATCTCTTCA
GAAAAAGTGACAACAGTAGCTGAGTTTGGTGATTCTAGTAAGTTAACTGTAGGAGAAACT
GCTATTGCCATCGGTAGCCCGTTAGGTTCTGAATATGCAAATACTGTCACTCAAGGTATC
GTATCCAGTCTCAATAGAAATGTATCCTTAAAATCGGAAGATGGACAAGCTATTTCTACA
AAAGCCATCCAAACTGATACTGCTATTAACCCAGGTAACTCTGGCGGCCCACTGATCAAT
ATTCAAGGGCAGGTTATCGGAATTACCTCAAGTAAAATTGCTACAAATGGAGGAACATCT
GTAGAAGGTCTTGGTTTCGCAATTCCTGCAAATGATGCTATCAATATTATTGAACAGTTA
GAAAAAAACGGAAAAGTGACGCGTCCAGCTTTGGGAATCCAGATGGTTAATTTATCTAAT
GTGAGTACAAGCGACATCAGAAGACTCAATATTCCAAGTAATGTTACATCTGGTGTAATT
GTTCGTTCGGTACAAAGTAATATGCCTGCCAATGGTCACCTTGAAAAATACGATGTAATT
ACAAAAGTAGATGACAAAGAGATTGCTTCATCAACAGACTTACAAAGTGCTCTTTACAAC
CATTCTATCGGAGACACCATTAAGATAACCTACTATCGTAACGGGAAAGAAGAAACTACC
TCTATCAAACTTAACAAGAGTTCAGGTGATTTAGAATCTTAA
>VFDBB~~~iga~~~33~~~immunoglobulin_A1_protease Streptococcus_pneumoniae_TIGR4
ATGGAAAAGTATTTTGGTGAAAAACAAGAGCGTTTTTCATTTAGAAAATTATCAGTAGGA
CTTGTATCTGCAACGATTTCAAGTTTATTTTTTATGTCTGTATTAGCTAGTTCATCTGTG
GATGCTCAAGAAACTGCGGGAGTTCACTATAAATATGTGGCAGATTCAGAGCTATCATCA
GAAGAAAAGAAGCAGCTTGTCTATGATATTCCGACATACGTGGAGAATGATGATGAAACT
TATTATCTTGTTTATAAGTTAAATTCTCAAAATCAACTGGCGGAATTGCCAAATACTGGA
AGCAAGAATGAGAGGCAAGCCCTAGTTGCTGGTGCTAGCTTAGCTGCTATGGGAATTTTA
ATTTTTGCTGTTTCCAAGAAAAAGGTTAAGAATAAAACGGTATTACATTTAGTATTGGTT
GCAGGGATAGGAAATGGTGTCTTAGTTTCAGTCCATGCTTTAGAAAATCATCTTTTGCTA
AATTACAATACGGACTATGAATTGACCTCTGGAGAAAAATTACCTCTTCCTAAAGAGATT
TCAGGTTACACTTATATTGGATATATCAAAGAGGGAAAAACGACTTCTGAGTCTGAAGTA
AGTAATCAAAAGAGTTCAGTTGCCACTCCTACAAAACAACAAAAGGTGGATTATAATGTT
ACACCGAATTTTGTAGACCATCCATCAACAGTACAAGCTATTCAGGAACAAACACCTGTT
TCTTCAACTAAGCCGACAGAAGTTCAAGTAGTTGAAAAACCTTTCTCTACTGAATTAATC
AATCCAAGAAAAGAAGAGAAACAATCTTCAGATTCTCAAGAACAATTAGCCGAACATAAG
AATCTAGAAACGAAGAAAGAGGAGAAGATTTCTCCAAAAGAAAAGACTGGGGTAAATACA
TTAAATCCACAGGATGAAGTTTTATCAGGTCAATTGAACAAACCTGAACTCTTATATCGT
GAGGAAACTATGGAGACAAAAATAGATTTTCAAGAAGAAATTCAAGAAAATCCTGATTTA
GCTGAAGGAACTGTAAGAGTAAAACAAGAAGGTAAATTAGGTAAGAAAGTTGAAATCGTC
AGAATATTCTCTGTAAACAAGGAAGAAGTTTCGCGAGAAATTGTTTCAACTTCAACGACT
GCGCCTAGTCCAAGAATAGTCGAAAAAGGTACTAAAAAAACTCAAGTTATAAAGGAACAA
CCTGAGACTGGTGTAGAACATAAGGACGTACAGTCTGGAGCTATTGTTGAACCCGCAATT
CAGCCTGAGTTGCCCGAAGCTGTAGTAAGTGACAAAGGCGAACCAGAAGTTCAACCTACA
TTACCCGAAGCAGTTGTGACCGACAAAGGTGAGACTGAGGTTCAACCAGAGTCGCCAGAT
ACTGTGGTAAGTGATAAAGGTGAACCAGAGCAGGTAGCACCGCTTCCAGAATATAAGGGT
AATATTGAGCAAGTAAAACCTGAAACTCCGGTTGAGAAGACCAAAGAACAAGGTCCAGAA
AAAACTGAAGAAGTTCCAGTAAAACCAACAGAAGAAACACCAGTAAATCCAAATGAAGGT
ACTACAGAAGGAACCTCAATTCAAGAAGCAGAAAATCCAGTTCAACCTGCAGAAGAATCA
ACAACGAATTCAGAGAAAGTATCACCAGATACATCTAGCAAAAATACTGGGGAAGTGTCC
AGTAATCCTAGTGATTCGACAACCTCAGTTGGAGAATCAAATAAACCAGAACATAATGAC
TCTAAAAATGAAAATTCAGAAAAAACTGTAGAAGAAGTTCCAGTAAATCCAAATGAAGGC
ACAGTAGAAGGTACCTCAAATCAAGAAACAGAAAAACCAGTTCAACCTGCAGAAGAAACA
CAAACAAACTCTGGGAAAATAGCTAACGAAAATACTGGAGAAGTATCCAATAAACCTAGT
GATTCAAAACCACCAGTTGAAGAATCAAATCAACCAGAAAAAAACGGAACTGCAACAAAA
CCAGAAAATTCAGGTAATACAACATCAGAGAATGGACAAACAGAACCAGAACCATCAAAC
GGAAATTCAACTGAGGATGTTTCAACCGAATCAAACACATCCAATTCAAATGGAAACGAA
GAAATTAAACAAGAAAATGAACTAGACCCTGATAAAAAGGTAGAAGAACCAGAGAAAACA
CTTGAATTAAGAAATGTTTCCGACCTAGAGTTATACAGTTTGTCAAATGGTACTTATAAA
CAACACATTTCGTTAGAGCAAGTTCCAAGCAATCCAAATAGCTACTTTGTTAAAGTGAAA
TCTTCTTCATTCAAAGATGTATACCTACCAGTAGCATCAATATCAGAGGAAAGAAAAAAT
GATAAAATCCTTTATAAAATCACAGCAAAAGTAGAGAAGCTTCAGCAGGAGATAGAAAGC
AGATATAAAGATAATTTTACCTTCTATCTAGCTAAGAAGGGAACAGAAGAAACAACAAAC
TTTACTTCCTTTAGTAATCTGGTCAAAGCTATAAACCAAAATCCCTCTGGAACCTATCAT
TTAGCGGCCAGCCTGAATGCTAACGAAGTGGAGCTTGGTCCTGATGAAAGATCCTATATC
AAGGACACCTTTACTGGTCGTTTAATCGGTGAAAAAGATGGCAAGAATTATGCTATCTAT
AATTTGAAAAAACCTCTGTTTGAAAACTTGAGTGGTGCTACAGTAGAAAAACTGAGTCTA
AAAAATGTTGCTATTTCAGGGAAAGATGATATCGGTTCACTGGCAAATGAAGCTCAGAAT
AACACAAAAATTAAGCAAGTTCACGTCGATGGTGTTCTGGCTGGTGAACGTGGTATCGGT
GGTTTGCTGGCTAAGGCTGAGCAATCAAGCATCACAGAGAGCAGTTTCAAGGGAAGAATT
ATCAACACTTATGAAACGACTGCTGCCTACAATATCGGTGGTATGGTCGGTCATTTGACA
GGTGACAAGGCTTTACTTACTAAGTCAAAAGCGACAGTAGCCATTTCATCTAACACAAAT
ACTTCAGATCAGACTGTGGGTGGACTTGCAGGCCTAGTAGACCGAGATGCACAGATCCAA
GATAGCTATGCTGAAGGTGATATCAACAATGTCAAGCACTTTGGTAGAGTCGCTGGAGTG
GCAGGCAATTTGTGGGATCGAACTTCTGGTGATGTTAGGCATGCTGGAAGTTTGACCAAT
GTTCTCAGCGATGTTAATGTAACCAACGGAAATGCCATCACTGGTTACCACTATAACGAA
ATGAAGGTAAAGGACACATTCAGCAGCAAGGCCAACAGAGTCTACAATGTCACCTTGGTC
AAGGATGAGGTCGTCAGCAAGGAATCCTTTGAAGAAAGAGGAACAATGCTAGATGCTTCT
CAAATTGCAAGCAAAAAAGCAGAAATCAATCCTCTCATTTTACCAACAGTGGAGCCACTT
TCAACAAGTGGCAAAAAAGACAGTGATTTTTCTAAGGTGGCCTATTATCAAGCTAAGCGC
AACTTGACTTATAAAAACATTGAAAAATTGCTACCTTTCTACAACAAGGCAACCATCGTC
AAATACGGAAACCTGGTCAATGAGAACAGTCTTTTATATCAAAAAGAACTCTTGTCAGCA
GTCATGATGAAGGACAACCAAGTCATCACAGACATTGTTTCTAACAAACAGACTGCAAAC
AAACTCTTGCTTCACTACAAGGATGATTTATCTGAGAAGCTGGATCTCAAATACCAGAAT
GATTTCGCCAAATTAGCAGAATATAGTCTGGGCAATACTGGACTTCTCTATACGCCAAAC
CAATTCCTGTATGACCAAACCTCTATCATCAAGCAAGTCTTACCTGACTTACAAAAGGTT
GACTATCATTCAGAAGCCATCAGAAAGACGCTGGGTATTTCTCCAAACGTCAAGCAAACT
GAGCTCTATCTAGAAGACCAGTTCGCCAAAACAAAACAACAACTGGAAGACAGTTTGAAA
AAACTCTTGTCAGCGGATGCTGGACTGGCTAGTGCTAACCCCGTCACTGAAGGTTATCTT
GTAGATAAAATCAAACGCAACAAGGAAGCCTTGCTACTTGGCTTGACCTATCTGGAACGG
TGGTATAACTTTAGCTATGGTCAGGTGAATGTCAAAGACCTAGTTCTGTACCATTTGGAC
TTCTTTGGTAAGGGGAATGCTTCACCATTAGATACTCTGATTGAGTTGGGTAAATCTGGC
TTTAACAATCTTCTAGCTAAGAATAATGTCGATACTTATGGTATCAGTCTTGCCAGTCAA
CATGGAACGACAGATTTGTTTAGCACGCTGGAACATTACCGAAAAGTCTTTTTACCAAAT
ACAAGCAATAATGACTGGTTTAAATCAGAGACTAAGGCTTACATTGTCGAAGAAAAATCC
ACTATCGAAGAGGTGAAAACGAAGCAAGGGTTAGCTGGCACCAAGTATTCTATCGGTGTT
TATGATCGTATCACGAGTGCCACATGGAAATACCGCAATATGGTCTTGCCTCTCCTGACC
TTGCCAGAGAGATCCGTATTTGTCATCTCGACCATGTCTAGTCTAGGATTTGGAGCTTAT
GATCGCTACCGCAGTAGTGACCATAAAGCGGGCAAGGCTCTCAATGATTTTGTTGAAGAA
AATGCGCGTGAAACAGCCAAACGTCAGCGAGATCACTACGATTATTGGTATCGTATTTTA
GACGACAATGCACGTGAAAAACTTTATAGAAATATTTTGCTTTACGATGCTTATAAATTT
GGCGATGATAATACCGTAGGGAAAGCTACAGAAGTGGCAGATTTTGATAATCCAAATCCT
GCAATGCAACATTTCTTTGGACCTGTTGGAAATAAAGTTGGGCATAATCAACACGGTGCT
TATGCTACAGGTGATGCAGTTTATTATATGGGTTATCGAATGTTGGATAAGGATGGAGCT
ATTACTTATACGCATGAGATGACACATGACTCAGATCAGGACATTTATCTTGGAGGATAT
GGTCGAAGAAGTGGCTTGGGACCAGAGTTCTTTGCTAAAGGATTATTACAAGCACCAGAC
CATCCAGATGATGCGACCATTACCATCAACTCCATCTTGAAACATTCAAAATCTGATAGT
ACAGAAAGTCGACGATTACAAGTACTTGATCCAACTACAAGATTTAATAATGCAGATGAT
TTGAAGCAATATGTCCACAACATGTTTGACGTTGTTTATATGTTGGAATATCTCGAAGGA
AATTCAATTCTTAAATTGGATACGAATCAAAAACAACAACTTCTTAGAAAAGTTACAAAT
GAGTACCATCCTGATCCTGATGGAAATAAGGTCTATGCAACAAATGTTGTCAGAAATCTA
ACAGTAGAAGAAGTTGAAAGACTACGTTCATTCAATGATTTGATTGATAATAATATTCTT
TCGTCTAGGGAATATGCCTCAGGTAAATACGAAAGAAATGGCTACTTCACTATTAAGTTA
TTTGCACCGATTTATGCTGCATTAAGTAATGATATAGGAACACCAGGTGACCTGATGGGA
CGTCGTATAGCCTATGAACTACTAGCTGCTAAAGGCTTTAAAGATGGTATGGTACCATAT
ATCTCAAACCAATACGAAGAAGAAGCCAAACAAAAGGGCAAGACAATCAATCTCTACGGT
AAAACAAGAGGTTTGGTTACAGATGACTTGGTTTTGGAAAAGGTATTTAATAACCAATAT
CATACTTGGAGTGAGTTTAAGAAAGCTATGTATCAAGAACGACAAGATCAGTTTGATAGA
TTGAACAAAGTTACTTTTAATGATACAACACAGCCTTGGCAAACATTTGCCAAGAAAACT
ACAAGCAGTGTAGATGAATTACAGAAATTAATGGACGTTGCTGTTCGTAAGGATGCAGAA
CACAATTACTACCATTGGAATAACTACAATCCAGACATAGATAGTGAAGTCCACAAGCTC
AAGAGAGCAATCTTTAAAGCCTATCTTGACCAAACAAATGATTTTAGAAGTTCAATTTTT
GAGAATAAAAAATAG
>VFDBB~~~cppA~~~34~~~cppA_protein Streptococcus_pneumoniae_TIGR4
ATGAATGTAAATCAGATTGTACGGATTATTCCTACTTTAAAAGCTAATAATAGAAAATTA
AATGAAACATTTTATATTGAAACCCTTGGAATGAAGGCCTTGTTAGAAGAATCGGCCTTT
CTGTCACTAGGTGACCAAACGGGTCTTGAAAAGCTGGTTTTAGAAGAAGCTCCCAGTATG
CGTACTCGTAAGGTAGAGGGAAGAAAAAAACTAGCTAGATTGATTGTCAAGGTGGAAAAT
CCCTTAGAAATTGAAGGAATCTTATCTAAAACAGATTCGATTCATCGATTATATAAAGGT
CAAAATGGCTACGCTTTTGAAATTTTCTCACCAGAAGATGATTTGATTTTGATTCATGCG
GAAGATGACATAGCAAGTCTAGTAGAAGTAGGAGAAAAGCCTGAATTTCAAACAGATTTG
GCATCAATTTCTTTAAGTAAATTTGAGATTTCTATGGAATTACATCTCCCAACTGATATC
GAAAGTTTCTTGGAATCATCTGAAATTGGGGCATCCCTTGATTTTATTCCAGCTCAGGGG
CAGGATTTGACTGTGGACAATACGGTTACCTGGGACTTATCTATGCTCAAGTTCTTGGTC
AATGAATTAGACATAGCAAGTCTTCGCCAGAAGTTTGAGTCTACTGAATATTTTATTCCT
AAGTCTGAAAAATTCTTCCTTGGTAAAGATAGAAATAATGTTGAATTGTGGTTTGAAGAA
GTATGA
>VFDBB~~~piuA~~~35~~~iron_compound_ABC_transporter Streptococcus_pneumoniae_TIGR4
ATGAAAACATCCCTTAAACTTTATTTCACTGCCCTAGTGGCCAGCTTCTTGCTCCTACTT
GGTGCATGTAGTACAAACTCAAGCACTAGTCAGACAGAGACCAGTAGCTCTGCTCCAACA
GAGGTAACCATTAAAAGTTCACTGGACGAGGTCAAACTTTCCAAAGTTCCTGAAAAGATT
GTGACCTTTGACCTCGGCGCTGCGGATACTATTCGCGCTTTAGGATTTGAAAAAAATATC
GTCGGAATGCCTACAAAAACTGTTCCGACTTATCTAAAAGACCTAGTGGGAACTGTCAAA
AATGTTGGTTCTATGAAAGAACCTGATTTAGAAGCTATCGCCGCCCTTGAGCCTGATTTG
ATTATCGCTTCGCCACGTACACAAAAATTCGTAGACAAATTCAAAGAAATCGCCCCAACC
GTTCTCTTCCAAGCAAGCAAGGACGACTACTGGACTTCTACCAAGGCTAATATCGAATCC
TTAGCAAGTGCCTTCGGCGAAACTGGTACACAGAAAGCCAAGGAAGAATTGACCAAGCTA
GACAAGAGCATCCAAGAAGTCGCTACTAAAAATGAAAGCTCTGACAAAAAAGCCCTTGCG
ATCCTCCTTAATGAAGGAAAAATGGCAGCCTTTGGTGCCAAATCTCGTTTCTCTTTCTTG
TACCAAACCTTGAAATTCAAACCAACTGATACAAAATTTGAAGACTCACGCCACGGACAA
GAAGTCAGCTTTGAAAGTGTCAAAGAAATCAACCCTGACATCCTCTTTGTCATCAACCGT
ACCCTTGCCATCGGTGGGGACAACTCTAGCAACGACGGTGTCCTAGAAAATGCCCTTATC
GCTGAAACACCTGCTGCTAAAAATGGTAAGATTATCCAACTAACACCAGACCTCTGGTAT
CTAAGCGGAGGCGGACTTGAATCAACAAAACTCATGATTGAAGACATACAAAAAGCTTTG
AAATAA
>VFDBB~~~eno~~~36~~~phosphopyruvate_hydratase Streptococcus_pneumoniae_TIGR4
ATGTCAATTATTACTGATGTTTACGCTCGCGAAGTCCTAGACTCACGCGGTAACCCAACA
CTTGAAGTAGAAGTTTACACTGAATCAGGTGCTTTCGGACGTGGTATGGTTCCATCAGGA
GCTTCTACTGGTGAACACGAAGCAGTTGAACTTCGCGACGGTGACAAATCTCGTTACGGT
GGTCTTGGTACACAAAAAGCTGTTGACAACGTAAACAACATCATTGCTGAAGCTATCATT
GGCTACGATGTACGTGATCAACAAGCTATTGACCGTGCTATGATCGCACTTGACGGTACT
CCTAACAAAGGTAAATTGGGTGCGAATGCAATCCTCGGTGTGTCTATCGCTGTAGCTCGT
GCTGCTGCTGACTACCTTGAAATCCCACTTTACAGCTATCTTGGTGGATTCAACACTAAA
GTTCTTCCAACTCCAATGATGAACATCATCAACGGTGGTTCTCACTCTGACGCTCCAATC
GCTTTCCAAGAGTTCATGATCTTGCCAGTTGGTGCGCCAACATTTAAAGAAGCCCTTCGT
TACGGTGCTGAAATCTTCCACGCTCTTAAGAAAATCCTTAAATCACGTGGTTTGGAAACT
GCCGTAGGTGACGAAGGTGGATTCGCTCCTCGTTTCGAAGGAACTGAAGATGGTGTTGAA
ACTATCCTTGCTGCGATTGAAGCTGCTGGATATGTACCAGGTAAAGACGTATTTATCGGA
TTTGACTGTGCTTCATCAGAATTCTACGATAAAGAACGTAAAGTTTACGACTACACTAAA
TTTGAAGGTGAAGGTGCTGCTGTTCGTACATCTGCAGAACAAATCGACTACCTTGAAGAA
TTGGTTAACAAATACCCAATCATCACTATTGAAGATGGTATGGATGAAAACGACTGGGAT
GGTTGGAAAGCTCTTACTGAACGTCTTGGTAAGAAAGTACAACTTGTTGGTGACGACTTC
TTCGTAACAAACACTGACTACCTTGCACGTGGTATCCAAGAAGGTGCTGCTAACTCAATC
CTTATCAAAGTTAACCAAATCGGTACTCTTACTGAAACTTTTGAAGCTATCGAAATGGCT
AAAGAAGCTGGTTACACTGCTGTTGTATCACACCGTTCAGGTGAAACTGAAGATTCAACA
ATCGCTGATATTGCAGTTGCAACTAACGCAGGACAAATCAAGACTGGTTCACTTTCACGT
ACAGACCGCATCGCTAAATACAACCAATTGCTTCGTATCGAAGACCAACTTGGTGAAGTA
GCTGAATATCGTGGATTGAAATCATTCTACAACCTTAAAAAATAA
>VFDBB~~~plr_gapA~~~37~~~glyceraldehyde_3_phosphate_dehydrogenase Streptococcus_pneumoniae_TIGR4
ATGGTAGTTAAAGTTGGTATTAACGGTTTCGGACGTATCGGTCGTCTTGCTTTCCGTCGT
ATCCAAAACGTAGAAGGTGTTGAAGTTACACGCATCAACGACCTTACAGATCCAGTTATG
CTTGCACACTTGTTGAAATACGACACAACTCAAGGTCGTTTCGACGGTACTGTTGAAGTT
AAAGAAGGTGGATTTGAAGTTAACGGTAAATTCATCAAAGTTTCTGCTGAACGTGATCCA
GAACAAATCGACTGGGCTACTGACGGTGTAGAAATCGTTCTTGAAGCTACTGGTTTCTTT
GCTAAGAAAGAAGCAGCTGAAAAACACCTTAAAGGTGGAGCTAAAAAAGTTGTTATCACT
GCTCCTGGTGGAAACGACGTTAAAACAGTTGTATTCAACACTAACCACGACGTTCTTGAC
GGTACTGAAACAGTTATCTCAGGTGCTTCATGTACTACAAACTGCTTGGCTCCAATGGCT
AAAGCTCTTCAAGACAACTTTGGTGTTGTTGAAGGATTGATGACTACTATCCACGCTTAC
ACTGGTGACCAAATGATCCTTGACGGACCACACCGTGGTGGTGACCTTCGCCGTGCTCGC
GCTGGTGCTGCAAACATCGTTCCTAACTCAACTGGTGCTGCAAAAGCTATCGGTCTTGTA
ATCCCAGAATTGAATGGTAAACTTGACGGATCTGCACAACGCGTTCCAACTCCAACTGGA
TCAGTTACTGAATTGGTAGCAGTTCTTGAAAAGAACGTTACTGTTGATGAAGTGAACGCA
GCTATGAAAGCAGCTTCAAACGAATCATACGGTTACACAGAAGATCCAATCGTATCTTCA
GATATCGTAGGTATGTCTTACGGTTCATTGTTTGACGCAACTCAAACTAAAGTTCTTGAC
GTTGACGGTAAACAATTGGTTAAAGTTGTATCATGGTACGACAACGAAATGTCATACACT
GCACAACTTGTTCGTACTCTTGAATACTTCGCAAAAATTGCTAAATAA
>VFDBB~~~slrA~~~38~~~peptidyl_prolyl_cis_trans_isomerase Streptococcus_pneumoniae_TIGR4
ATGAAAAAACTAGCAACCCTTCTTTTACTGTCTACTGTAGCCCTAGCTGGGTGTAGCAGC
GTCCAACGCAGTCTGCGTGGTGATGATTATGTTGATTCCAGTCTTGCTGCTGAAGAAAGT
TCCAAAGTAGCTGCCCAATCTGCCAAGGAGTTAAACGATGCTTTAACAAACGAAAACGCC
AATTTCCCACAACTATCTAAGGAAGTTGCTGAAGATGAAGCCGAAGTGATTTTCCACACA
AGCCAAGGTGATATTCGCATTAAACTCTTCCCTAAACTCGCTCCTCTAGCGGTTGAAAAT
TTCCTCACTCACGCCAAAGAAGGCTACTATAACGGTATTACCTTCCACCGTGTCATCGAT
GGCTTTATGGTCCAAACTGGAGATCCAAAAGGGGACGGTACAGGTGGTCAGTCCATCTGG
CATGACAAGGATAAGACTAAAGACAAAGGAACTGGTTTCAAGAACGAGATTACTCCTTAT
TTGTATAACATCCGTGGTGCTCTTGCTATGGCTAATACTGGTCAACCAAACACCAATGGC
AGCCAGTTCTTCATCAACCAAAACTCTACAGATACCTCTTCTAAACTCCCTACAAGCAAG
TATCCACAGAAAATTATTGAAGCCTACAAAGAAGGTGGAAACCCTAGTCTAGATGGCAAA
CACCCAGTCTTTGGTCAAGTGATTGACGGTATGGATGTTGTGGATAAGATTGCTAAGGCC
GAAAAAGATGAAAAAGACAAGCCAACTACTGCTATCACAATCGACAGCATCGAAGTGGTG
AAAGACTACGATTTTAAATCTTAA
>VFDBB~~~srtA~~~39~~~Sortase Streptococcus_pneumoniae_R6
ATGTCTCAAAAAAATAATAAAAAGAAAAACAAGCGAAAAAATCTGCTGACAAATATCCTA
GCAGGATTTCTGATATTACTGTCACTGGCTTTGATTTTTAATACTCAAATTCGAAATATT
TTCATAGTCTGGAATACCAATAAGTATCAAGTTAGCCAGGTATCAAAAGAAAAATTAGAA
GAAAATCAGGATACAGAAGGCAATTTTGACTTTGATTCTGTCAAAGCTATCTCTTCGGAA
GCTGTTCTAACTTCTCAATGGGATGCTCAAAAATTACCAGTTATTGGGGGAATTGCAATT
CCTGAATTGGAAATGAATTTGCCGATTTTTAAAGGACTTGATAATGTTAATCTCTTCTAC
GGAGCTGGTACAATGAAACGCGAGCAAGTAATGGGAGAAGGAAATTATAGTCTAGCTAGT
CACCATATCTTTGGTGTTGATAATGCTAATAAAATGTTATTTTCTCCTTTAGATAATGCT
AAAAATGGCATGAAGATTTATCTAACCGATAAAAATAAAGTTTATACTTATGAAATACGT
GAAGTCAAACGTGTGACACCAGATCGTGTTGATGAAGTTGATGATAGAGATGGGGTCAAT
GAAATCACATTAGTAACCTGTGAAGACCTTGCTGCTACAGAACGTATTATTGTCAAAGGT
GATTTGAAAGAAACAAAAGATTATTCACAAACATCTGATGAAATCCTAACAGCTTTCAAT
CAACCATATAAACAATTTTATTAA
>VFDBB~~~lmb~~~40~~~adhesion_lipoprotein Streptococcus_pneumoniae_TIGR4
ATGAAGAAACAAAATTTATTTTTAGTCCTGTTAAGTGTCTTTCTTTTGTGCTTGGGGGCT
TGTGGTCAAAAGGAAAGTCAGACAGGAAAGGGGATGAAAATTGTGACCAGTTTTTATCCT
ATCTACGCTATGGTTAAGGAAGTATCTGGTGACTTGAATGATGTTCGGATGATTCAGTCA
AGTAGTGGTATTCACTCCTTTGAACCTTCGGCAAATGATATCGCAGCCATCTATGATGCA
GATGTCTTTGTTTACCATTCTCATACACTCGAATCTTGGGCAGGAAGTCTGGATCCAAAT
CTAAAAAAATCCAAAGTGAAGGTCTTAGAGGCTTCTGAGGGAATGACCTTGGAACGTGTC
CCTGGACTAGAGGATGTGGAAGCAGGGGATGGAGTTGATGAAAAAACGCTCTATGACCCT
CACACATGGCTAGATCCTGAAAAAGCTGGAGAAGAAGCCCAAATTATCGCTGATAAACTT
TCAGAGGTGGATAGTGAGCATAAAGAGACTTATCAAAAAAATGCGCAAGCCTTTATCAAA
AAAGCTCAGGAATTGACTAAGAAATTCCAACCAAAATTTGAAAAAGCGACTCAGAAAACA
TTTGTAACACAACATACAGCCTTTTCTTATCTAGCGAAGAGATTTGGGCTTAATCAACTT
GGTATTGCAGGTATCTCTCCTGAACAAGAACCAAGTCCACGACAACTAACAGAAATTCAG
GAATTTGTTAAGACCTATAAGGTTAAAACGATTTTTACAGAAAGTAACGCTTCTTCAAAA
GTAGCTGAAACTCTTGTCAAATCAACAGGTGTGGGTCTTAAAACTCTGAATCCTTTAGAG
TCAGACCCACAAAATGACAAGACCTATTTAGAAAATCTTGAAGAAAATATGAGTATTCTA
GCAGAAGAATTAAAGTGA
>VFDBC~~~phtA~~~41~~~Pneumococcal_histidine_triad_protein_A_precursor Streptococcus_pneumoniae_R6
ttagtttattttttccttacttacagatgaaggattacttccttttaacaacgcaagtaatttttctgcttctgccatgatactattgttatccataatttgaagagtcaaattatttcgtaaaccagctagagtttctgttgcattggctttcagactagaatccgttactttcgcaagcaaaacttctgcttctttgagttgggcttctactttttcagtctctacttgagggacttctggctcagcaggtgtttcctctactggctcttcatccgctttgaagttcttatttggatcttcactgtggtctttcttgcctaacacatgctcactggcattgccccatccatcattagaatgtggacgttcgtcagggtgttctacgtagtacttaatcgtcgcaaacaaatcttccaaggtatagccatttggagctttgtatgtgtgatcatcaaaccaagcaaatttaatattatggtaatgatccttatgaggaataatcaaattaccgtttttaacctcaactgtatgctcaaccatatatggaagtcgaacgagtggaattcgtttttcccctttcacacgattgtaaatagctgctgcactatctccagttggatttgctttaacatctgcgtctggagatggaggtaggatacctttttctttagtataggcttgagctgcaactttttccttatcagaaaggctgtcttttccaatccagtgactatggcccatatgaggcgttacatatgcatctccttcatcactgattatatcatgttcatcaaaaatgtaaccatctgacgttgtatacttatcagctaattgagcaatacgaacttcgtcttcagtatactcaatttgagaatttggcttgccaagtcgctctggatgggtaattggtgctaggaatgccaataaatcatctaccaatttttctttattagtcgattcatcattcaagcgttctaataatttgtctaaggcttggaaatcagaattacgacccttattttcaaacaaggctttatgagcctcagttaacagattatatgctttatcataaaattcttggtcacgaggagcaacattttcttttttagcagttaaagtgtgtgaaacactctcttgttttgataacttactttcaagatttttaacagtttcagatggtaaatctttcgcaaagacataacgagagatgcccttttcttcgaatacatatccttccccaacttttcgtaccagctgactaaccaaagaagaatttgagtctattttaagatttggtgcaggttgcgggcctggactaggttccggagtcggttgtggacttggttgttctggccttgaatctggtacccaatggtttgaacgataacgaaggggaataatacgagcgattcgttcttccaattcagacatttgagagtaagggatgaagtggtaatgatctccgtgtggcactgcaacacctctagctgttcgacttgtgatttgcgctgggtcgaaaacaaggccatcagattctacatgtcgttgactcaaaggcagtttgtagagctgtttcaagagactatcaatgtcattactttgacttgcttgactgttagtgttgctgttgttgcttgtgttagtatttgtagttcctggattgcttacagaaggtacccagtttgttcttgaagtgttatcgctattttgtcggcgataggttcttgaatttgacagatttccccgaccagataggaaggcttctgcagcagccaactcgctagctgataactcattcttaggaatgtaatggtaatgatctccatgaggaacgatataagcatcaccagtatcctctatgatatcagaagcattaaagatataaccatcatctgtagtatagcgtccttgcgaacgtgccaaggcaacagcaccatcgtttcttggagtcccaccttcacgatgttgactatgttcttgtttttgtcgattgatttcctcttttgtacggacgttatccgcgtgggcagcatccttaaggtaaacatagtattttccatctaccttgataacatatccacccttgacctcattaacaatatcctcatcttttagcttatagtttggatctttcatgagtaattcttcactgaaaatcgcatcataaggaaccttaccattgtaataatgatagtggtcgccatgtgaagtgacatagccttggtctgttatcttgatgacgatttgctcagcattgattccttcacgcttgctaacctcatcaggagtcaaattctccgttttttgcgtcgcttgttttccatctatataggaaacacgattattttccttaaccgttctagcttgatacagtcccaactcgtaagaacaaacacttaaaatcaaagctgccgcagaaccaacaaggtatttcttattaattttcatcgaaactctctttctatttgatatttctagttgcaa
>VFDBC~~~phtD~~~42~~~Pneumococcal_histidine_triad_protein_D_precursor Streptococcus_pneumoniae_R6
atgaaaatcaataaaaaatatctagcaggttcagtggcagtccttgccctaagtgtttgttcctatgaacttggtcgtcaccaagctggtcaggttaagaaagagtctaatcgagtttcttatatagatggtgatcaggctggtcaaaaggcagaaaatttgacaccagatgaagtcagtaagagagaggggatcaacgccgaacaaattgttatcaagattacggatcaaggttatgtgacctctcatggagaccattatcattactataatggcaaggttccttatgatgccatcatcagtgaagaacttctcatgaaagatccgaattatcagttgaaggattcagacattgtcaatgaaatcaagggtggctatgtgattaaggtagacggaaaatactatgtttaccttaaagatgcggcccatgcggacaatattcggacaaaagaagagattaaacgtcagaagcaggaacgcagtcataatcacaactcaagagcagataatgctgttgctgcagccagagcccaaggacgttatacaacggatgatgggtatatcttcaatgcttctgatatcattgaagatactggtgatgcttatatcgttcctcacggcgaccattaccattacattcctaagagtgatttgtctgccagtgaattagctgctgcccaagcctattggaatgggaagcagggatctcgtccttcttcaagttctagtcataatgcaaatccagctcaaccaagattgtcagagaaccacaatctgactgtcactccaacttatcatcaaaatcaaggggaaaacatttcaagccttttacgtgaattgtatgctaaacccttatcagaacgccatgtagaatctgatggccttattttcgacccagcgcaaatcacaagtcgaaccgccaatggtgttgctgtaccgcacggagaccattatcactttattccttattcacaactgtcacctttggaagaaaaattggctcgtattattccccttcgttatcgttcaaaccattgggtaccagattcaagaccagaacaaccaagtccacaatcgactccggaacctagtccaagtccgcaacctgcaccaaatcctcaaccagctccaagcaatccaattgatgagaaattggtcaaagaagctgttcgaaaagtaggcgatggttatgtctttgaggagaatggagttcctcgttatatcccagccaaggatctttcagcagaaacagcagcaggcattgatagcaaactggccaagcaggaaagtttatctcataagctaggagctaagaaaactgacctcccatctagtgatagagaattttacaataaggcttatgacttactagcaagaattcatcaagatttacttgataataaaggtcgacaagttgattttgaggctttggataacctgttggaacgactcaaggatgtctcaagtgataaagtcaagttagtggatgatattcttgccttcttagctccgattcgtcatccagaacgtttaggaaaaccaaatgcgcaaattacctacactgatgatgagattcaagtagccaagttggcaggcaagtacacaacagaagacggttatatctttgatcctcgtgatataaccagtgatgagggggatgcctatgtaactccacatatgacccatagccactggattaaaaaagatagtttgtctgaagctgagagagcggcagcccaggcttatgctaaagagaaaggtttgacccctccttcgacagaccatcaggattcaggaaatactgaggcaaaaggagcagaagctatctacaaccgcgtgaaagcagctaagaaggtgccacttgatcgtatgccttacaatcttcaatatactgtagaagtcaaaaacggtagtttaatcatacctcattatgaccattaccataacatcaaatttgagtggtttgacgaaggcctttatgaggcacctaaggggtatagtcttgaggatcttttggcgactgtcaagtactatgtcgaacatccaaacgaacgtccgcattcagataatggttttggtaacgctagcgaccatgttcaaagaaacaaaaatggtcaagctgataccaatcaaacggaaaaaccaaacgaggagaaacctcagacagaaaaacctgaggaagataaggaacatgatgaagtaagtgagccaactcaccctgaatctgatgaaaaagagaatcacgttggtttaaatccttcagcagataatctttataaaccaagcactgatacggaagagacagaggaagaagctgaagatactacagatgaggctgaaattcctcaagtagagcattctgttattaacgctaagatagcagaggcggaggccttgctagaaaaagtaacagattctagtattagacaaaatgctgtggagacattgactggtctaaaaagtagtcttcttctcggaacgaaagataataacactatttcagcagaagtagatagtctcttggctttgttaaaagaaagtcaaccgactcctatacagtag
>VFDBC~~~phtE~~~43~~~Pneumococcal_histidine_triad_protein_E_precursor Streptococcus_pneumoniae_R6
atgaaattcagtaaaaaatatatagcagctggatcagctgttatcgtatccttgagtctatgtgcctatgcactaaaccagcatcgttcgcaggaaaataaggacaataatcgtgtctcttatgtagatggcagccagtcaagtcagaaaagtgaaaacttgacaccagaccaggttagccagaaagaaggaattcaggccgagcaaattgtaatcaaaattacagatcagggctatgtaacgtcacacggtgaccactatcattactataatgggaaagttccttatgatgccctctttagtgaagaactcttgatgaaggatccaaactatcaacttaaagacgctgatattgtcaatgaagtcaagggtggttatatcatcaaggtcgatggaaaatattatgtctacctgaaagatgcagctcatgctgataatgttcgaactaaagatgaaatcaatcgtcaaaaacaagaacatgtcaaagataatgagaaggttaactctaatgttgctgtagcaaggtctcagggacgatatacgacaaatgatggttatgtctttaatccagctgatattatcgaagatacgggtaatgcttatatcgttcctcatggaggtcactatcactacattcccaaaagcgatttatctgctagtgaattagcagcagctaaagcacatctggctggaaaaaatatgcaaccgagtcagttaagctattcttcaacagctagtgacaataacacgcaatctgtagcaaaaggatcaactagcaagccagcaaataaatctgaaaatctccagagtcttttgaaggaactctatgattcacctagcgcccaacgttacagtgaatcagatggcctggtctttgaccctgctaagattatcagtcgtacaccaaatggagttgcgattccgcatggcgaccattaccactttattccttacagcaagctttctgccttagaagaaaagattgccagaagggtgcctatcagtggaactggttctacagtttctacaaatgcaaaacctaatgaagtagtgtctagtctaggcagtctttcaagcaatccttcttctttaacgacaagtaaggagctctcttcagcatctgatggttatatttttaatccaaaagatatcgttgaagaaacggctacagcttatattgtaagacatggtgatcatttccattacattccaaaatcaaatcaaattgggcaaccgactcttccaaacaatagtctagcaacaccttctccatctcttccaatcaatccaggaatttcacatgagaaacatgaagaagatggatacggatttgatgctaatcgtattatcgctgaagatgaatcaggatttatcatgagtcacggtaatcataatcattacttcttcaagaaggacttgacagaagagcaaattaaagctgcgcaaaaacatttagaggaagttaaaactagtcataatggattagattctttgtcatctcatgaacaggattatccaggtaatgccaaagaaatgaaagatttagataaaaaaatcgaagaaaaaattgctggcattatgaaacaatatggtgtcaaacgtgaaagtattgtcgtgaataaagaaaaaaatgcgattatttatccgcatggagatcatcatcatgcagatccgattgatgaacataaaccggttggaattggtcattctcacagtaactatgaactgtttaaacccgaagaaggagttgctaaaaaagaagggaataaagtttatactggagaagaattaacgaatgttgttaatttgttaaaaaatagtacgtttaataatcaaaactttactctagccaatggtcaaaaacgcgtttcttttagttttccgcctgaattggagaaaaaattaggtatcaatatgctagtaaaattaataacaccagatggaaaagtattggagaaagtatctggtaaagtatttggagaaggagtagggaatattgcaaactttgaattagatcagccttatttaccaggacaaacatttaagtatactatcgcttcaaaagattatccagaagtaagttatgatggtacatttacagttccaacctctttagcttacaaaatggccagtcaaacgattttctatcctttccatgcaggggatacttatttaagagtgaaccctcaatttgcagtgcctaaaggaactgatgctttagtcagagtgtttgatgaatttcatggaaatgcttatttagaaaataactataaagttggtgaaatcaaattaccgattccgaaattaaaccaaggaacaaccagaacggccggaaataaaattcctgtaaccttcatggcaaatgcttatttggacaatcaatcgacttatattgtggaagtacctatcttggaaaaagaaaatcaaactgataaaccaagtattctaccacaatttaaaaggaataaagcacaagaaaactcaaaacttgatgaaaaggtagaagaaccaaagactagtgagaaggtagaaaaagaaaaactttctgaaactgggaatagtactagtaattcaacgttagaagaagttcctacagtggatcctgtacaagaaaaagtagcaaaatttgctgaaagttatgggatgaagctagaaaatgtcttgtttaatatggacggaacaattgaattatatttaccatcgggagaagtcattaaaaagaatatggcagattttacaggagaagcacctcaaggaaatggtgaaaataaaccatctgaaaatggaaaagtatctactggaacagttgagaaccaaccaacagaaaataaaccagcagattctttaccagaggcaccaaacgaaaaacctgtaaaaccagaaaactcaacggataatggaatgttgaatccagaagggaatgtggggagtgaccctatgttagatccagcattagaggaagctccagcagtagatcctgtacaagaaaaattagaaaaatttacagctagttacggattaggcttagatagtgttatattcaatatggatggaacgattgaattaagattgccaagtggagaagtgataaaaaagaatttatctgatctcatagcgtaa
>VFDBC~~~phtB~~~44~~~Pneumococcal_histidine_triad_protein_B_precursor Streptococcus_pneumoniae_TIGR4
ttacttactctcctttaataaagccaatagtttttcagcttctgccataatagtattgttgtcctgggtgccaaatagtaaattattttttaatcctgtgagagtctctttggcattggacttgataattggatcctggatttttccaagtaaatcttcagcctctctcagtttttcttcaaccttttcagtctcgacctgaggttcttctgattcctctggtgattcttctggttcctctgttggttttggagactctggtttctcgctttgcggtttctcttctcgaggggtttcttcctcaggtttttctgtctgaggtttctcctcgcttggtttttccgtttgattggtatcagcttgaccatttttgtttctttgaacatggtcgctagcgttaccaaaaccattatctgaatgcggacgttcgtttggatgttcgacatagtacttgacagtcgccaaaagatcctcaagagtataccccttaggtgcctcataaaggccttcgtcaaaccactcaaatttgatgttatggtaatggtcataatgaggtatgattaaactaccgtttttgacttctacagtatattgaagattgtaaggcatacgatcaagtggcaccttcttagctgctttcacgcggttgtagatagcttctgctccttttgcctcagtatttcctgaatcctgatggtctgtcgaaggaggggtcaaacctttctctttagcataagcctgggctgccgctctctcagcttcagacaaactatcttttttaatccagtggctatgggtcatatgtggagttacataggcatccccctcatcactggttatatcacgaggatcaaagatataaccgtcttctgttgtgtacttgcctgccaacttggctacttgaatctcatcatcagtgtaggtaatttgcgcatttggttttcctaaacgttctggatgacgaatcggagctaagaaggcaagaatatcttccactaacttgactttatcacttgagacatccttgagtcgttccaacaggttatccaaagcctcaaaatcaacttgtcgacctttattatcaagtaaatcttggtgaattcttgctagtaagtcataagccttattgtaaaattctcgatcactagatgggaggtcagttttcttagttcctagcttatgagataaactttcctgcttggccagtttgctatcaatgcctgctgctgtttctgctgaaagatccttggctgggatataacgagaaactccattctcctcaaagacataaccatcgcctacttttcgaacagcttctttgaccaatttctcatcaattggattgcttggagctggttgcggacttggactaggttctggagtcggttgtggacttggttcttctggtcttgaatctggtacccaatggtttgaacgataacgaaggggaataatacgagcaattcgtttttccaattcagacatttgttcataagggataaagtggtaatggttaccatgagggacagctacacctctggcggttcgacttgtgatttgcgctgggtcgaaaataaggccatcagattccacatggcgttctgataagggtttagcatacaattcacgtaaaaggcttgaaatgttttccccttgattttgatgataagttggagtgacagtcagattgtggttctctgacaatcttggttgagctggatttgcattataactagaacttgaagaaggacgagatccctgcttcccattccaataggcttctgcagcagctaactcgctagctgataactcattcttaggaatgtaatggtaatggtcgccgtgaggaacgatataagcatcacccgtgtcctcaatgatatcagatgcattgaagatatacccatcatccgttgtataacgtccttgggctctggctgcagcaacagcattatctgctcttgagttatgattatgactgcgttcctgcttctgacgtttaatctcttcttttgtccgaatattatccgcatgagctgcatccttaaggtaaacatagtatttaccgtttaccttaatgacataaccacccttgatttcattgacaatgtctgaatccttcaactgataattcggatctttcatgaggagctcttcactgatgatggcatcataaggaaccttgccattatagtaatgataatggtctccatgagaggtcacataaccttgatccgtaatcttgataacaatttgttcggcgttgatcccctccctcttactgacttcatctggtgtcaagttttctgccttttgaccagcctgatcaccatctatataagcaactcgattagactctttcttatcctgaccagcttggtaacgtccaagctcataggaacaaacacttagggcaaggactgccactgaacctgctagatattttttattaattttcat
>VFDBC~~~prtA~~~45~~~Cell_wall_associated_serine_proteinase_precursor Streptococcus_pneumoniae_R6
atgaaaaaaagcacagtattgtcactaactacagctgcagttattttagcagcctatgcccctaatgaggtagtcttagcagacacatctagctctgaagatgctttaagcatctctgataaagaaaaagtagtagtagataaggaaacagaaaataaagagaaacataaagatattcataatgctatagaaacttcaaaggatactgaagaaaagaaaacaacaattattgaggaaaaagaagttgttagtaaaaatcctgtaatagacactaaaactagcaatgaagaagcaaaaatcaaagaagaaaattccaatcaatcccaaggagatcatacggactcatttgtgaataaaaacacagaaaatcccaaaaaagaagataaagttgtctatattgctgaatttaaagataaagaatctggagaaaaagcaatcaagggactatcaaatcttaagaatacaaaagttttatatacttatgatagaatttttaacggtagtgccatagaaacaactccagataacttggacaaaattaaacaaatagaaggtatttcatcgattgaaagggcacaaaaagtccaacccatgatgaatcatgccagaaaggaaattggagttgaggaagctattgattacctaaagtctatcaatgctccgtttgggaaaaattttgatggtagaggtatggtcatttcaaatatcgatactggaacagattatagacataaggctatgagaatcgatgatgatgccaaagcctcaatgagatttaaaaaagaagacttaaaaggaactgataaaaattattggttgagtgataaaatccctcatgcgttcaattattataatggtggcaaaatcactgtagaaaaatatgatgatggaagggattattttgacccacatgggatgcatattgcagggattcttgctggaaatgatactgaacaagatatcaaaaactttaacggcatagatggaattgcacctaatgcacaaattttctcttacaaaatgtattctgacgcaggatctgggtttgcgggtgatgaaacaatgtttcatgctattgaagattctatcaaacacaacgttgatgttgtttcggtatcatctggttttacaggaacaggtcttgtaggtgagaaatattggcaagctattcgggcattaagaaaagcaggcattccaatggttgtcgctacgggtaactatgcgacttctgcttcaagttcttcatgggatttagtagcaaataatcatctgaaaatgaccgacactggaaatgtaacacgaactgcagcacatgaggatgcgatagcggtcgcttctgctaaaaatcaaacagttgagtttgataaagttaacataggtggagaaagttttaaatacagaaatataggggcctttttcgataagaataaaatcacaacaaatgaagatggaacaaaagctcctagtaaattaaaatttgtatatataggcaaggggcaagaccaagatttgataggtttggatcttaggggcaaaattgcagtaatggatagaatttatacaaaggatttaaaaaatgcttttaaaaaagctatggataagggtgcacgcgccattatggttgtaaatactgtaaattactacaatagagataattggacagagcttccagctatgggatatgaagcggatgaaggtactaaaagtcaagtgttttcaatttcaggagatgatggtgtaaagctatggaacatgattaatcctgataaaaaaactgaagtcaaaagaaataataaagaagattttaaagataaattggagcaatactatccaattgatatggaaagttttaattccaacaaaccgaatgtaggtgacgaaaaagagattgactttaagtttgcacctgacacagacaaagaactctataaagaagatatcatcgttccagcaggatccacatcttgggggccaagaatagatttacttttaaaacccgatgtttcagcacctggtaaaaatattaaatctacgcttaatgttattaatggcaaatcaacttatggctatatgtcaggaactagtatggcgactccaatcgtggcagcttctactgttttgattagaccgaaattaaaggaaatgcttgaaagacctgtattgaaaaatcttaagggagatgacaaaatagatcttacaagtcttacaaaaattgccctacaaaatactgctcgacctatgatggatgcaacttcttggaaagaaaaaagtcaatactttgcatcacctagacaacagggagcaggcctaattaatgtggccaatgctttgagaaatgaagttgtagcaactttcaaaaacactgattctaaaggtttggtaaactcatatggttccatttctcttaaagaaataaaaggtgataaaaaatactttacaatcaagcttcacaatacatcaaacagacctttgacttttaaagtttcagcatcagcgataactacagattctctaactgacagattaaaacttgatgaaacatataaagatgaaaaatctccagatggtaagcaaattgttccagaaattcacccagaaaaagtcaaaggagcaaatatcacatttgagcatggtactttcactataggcgcaaattctagctttgatttgaatgcggttataaatgttggagaggccaaaaacaaaaataaatttgtagaatcatttattcattttgagtcagtggaagaaatggaagctctaaactccaacgggaagaaaataaacttccaaccttctttgtcgatgcctctaatgggatttgctgggaattggaaccacgaaccaatccttgataaatgggcttgggaagaagggtcaagatcaaaaacactgggaggttatgatgatgatggtaaaccgaaaattccaggaaccttaaataagggaattggtggagaacatggtatagataaatttaatccagcaggagttatacaaaatagaaaagataaaaatacaacatccctggatcaaaatccagaattatttgctttcaataaccaagggatcaacgctccatcatcaagtggttctaagattgctaacatttatcctttagattcaaatggaaatcctcaagatgctcaacttgaaagaggattaacaccttctccacttgtattaagaagtgcagaagaaggattgatttcaatagtaaatacaaataaagagggagaaaatcaaagagacttaaaagtcatttcgagagaacactttattagaggaattttaaattctaaaagcaatgatgcaaagggaatcaaatcatctaaactaaaagtttggggtgacttgaagtgggatggactcatctataatcctagaggtagagaagaaaatgcaccagaaagtaaggataatcaagatcctgctactaagataagaggtcaatttgaaccgattgcggaaggtcaatatttctataaatttaaatatagattaactaaagattacccatggcaggtttcctatattcctgtaaaaattgataacaccgcccctaagattgtttcggttgatttttcaaatcctgaaaaaattaagttgattacaaaggatacttatcataaggtaaaagatcagtataagaatgaaacgctatttgcgagagatcaaaaagaacatcctgaaaaatttgacgagattgcgaacgaagtttggtatgctggcgccgctcttgttaatgaagatggagaggttgaaaaaaatcttgaagtaacttacgcaggtgagggtcaaggaagaaatagaaaacttgacaaagacggaaataccatttatgaaattaaaggtgcaggagatttaagaggaaaaatcattgaagtcattgcattagatggttctagcaatttcacaaagattcatagaattaaatttgctgatcaggctgatgaaaaggggatgatttcttattacctagtagatcctgacaaagatgcttctaaatatgaaaaacttggtgaaatttctgaagataaactcaaaaatgcaaagagcccagaggaaaataccaataataatcaagctaaggatgaagattcaaaaccagatgaaaaaagttcagttgagggagaagctagccttgaaataaataaaactatttcaacaattagagagtttgaaaataaagacctaaagaaactcattaaaaagaaatttagagaagttaatgattttacaagtgaaactggtaagagaatagaggaatacgattataaatacgatgataagggaaatattattgcttatgacgatggtagtgccttacaatatgaaactgaaaaatttgacgaaataaaatcaaaaatttatggtgttctaagcccatctaaagatggacactttgaaattcttggaaagataagcaatgtttctaaaaatgccaaggtatattatggaaatagctataaatcgatagaaatcaaagcgactaagtatgattcacattcaaaaacgatgatatttgatttatacgctaatattaatgatattgtagatggattagcttttgctggagatatgagattatttgttaaagatgacaatcaaataaaagctgaaactaagattagaatgcctgaaaaaaataaggaaactaaagcagaatatccctatgtatcaagttatgggaatgtaatcgaattaggagaaggagatctttcaaagaacaaaccagacaatttaactaaaatggaatctggtaaaatctattctgattcagaaaaacaacaatatctgttaaaggataacatcattctaagaaaaggctatgcactaaaagtgactacctataatcctggaaaaacggatatgttagaaggaaatggagtctatagcaaggaagatatagcaaaaatacaaaaggccaatcctaatctaagagtcctttcagaaacaacaatttatgctgatagtagaaatgttgaagatggaagaagtacccaagctgtattaatgtcggctttggacggctttaacattataaggtatcaagtgtttacatttaaaatgaacgataaaggggaagctatcgataaagacggaaatcttgtgacagattcttctaaacttgtattatttggtaaggatgataaagaatacactggagaggataagtccaatgtagaagctataaaagaagatggctccatgttatttattgataccaaaccagtaaacctttcaatggataagaactactttaatccatctaaatctaataaaatttatgtacgaaatccagaattttatttaagaggtaagatttctgataagggtggttttaactgggaattgagagttaatgaatcggttgtagataattatttaatctacggagatttacacattgataacactagagattttaatattaagctgaatgttaaagacggtgacatcatggactggggaatgaaagactataaagcaaacggatttccagataaggtaacagatatggatggaaatgtttatcttcaaactggctatagcgatttgaatgctaaagcagttggagtccactatcagtttttatatgataatgttaaacctgaagtaaacattgatcctaagggaaatactagtatcgaatatgctgatggaaaatctgtagtctttaacatcaatgataaaagaaataatggattcgatggtgagattcaagaacaacatatttatgtaaatggaaaagaatatacatcatttgatgatattaaacaaataacagacaagacactaaacattaagattgttgtaaaagattttgcaagaaatacaaccgtaaaagaattcattttaaataaagatacgggagaggtaagtgaattaaaacctcatagggtaactgtgaccattcaaaatggaaaagaaatgagttcaacgatagtgtcggaagaagattttattttacctgtttataagggtgaattagaaaaaggataccaatttgatggttgggaaatttctggtttcgaaggtaaaaaagacgctggctatgttattaatctatcaaaagatacctttataaaacctgtattcaagaaaatagaggagaaaaaggaggaagagaataaacctacttttgatgtatcgaaaaagaaagataacccacaagtaaatcatagtcaattaaatgaaagtcacagaaaagaggatttacaaagagaagatcattcacaaaaatctgattcaactaaggatgttacagctacagttcttgataaaaacaatatcagtagtaaatcaactactaacaatcctaataagttgccaaaaactggaacagcaagcggagcccagacactattagctgccggaataatgtttatagtaggaatttttcttggattgaagaaaaaaaatcaagattaa
>VFDBC~~~gndA~~~46~~~NADP_dependent_phosphogluconate_dehydrogenase Streptococcus_pneumoniae_R6
atgacaaaagctaactttggtgtcgtaggtatggccgtaatgggtcgtaaccttgcccttaatattgaatctcgtggttacacagttgctatctacaaccgtagtaaagaaaaaacggaagatgtgattgcttgccatcctgaaaagaactttgtaccaagctatgacgttgaaagttttgtaaactcaatcgaaaaacctcgtcgtatcatgctgatggttcaagctggacctggtacagatgctactatccaagcccttcttccacaccttgacaagggtgatatcttgattgacggaggaaatactttctacaaagataccatccgtcgtaatgaagaattggcaaactctggtatcaactttatcggtactggggtttctggtggtgaaaaaggtgcccttgaaggtccttctatcatgcctggtggacaaaaagaagcctacgaattggttgcggatgttcttgaagaaatctcagctaaagcaccagaagatggcaaaccatgtgtgacttacatcggtcctgatggagctggtcactatgtgaaaatggttcacaatggtattgagtacggtgatatgcaattgatcgcagaaagctatgacttgatgcaacacttgctaggcctttctgcagaagatatggctgaaatctttactgagtggaacaagggtgaattagacagctacttgattgaaatcacagctgatatcttgagccgtaaagacgatgaaggccaagatggaccaatcgtagactacatccttgatgctgcaggtaacaagggaactggtaaatggactagccaatcatctcttgaccttggtgtaccattgtcactgattactgagtcagtgtttgcacgctacatttcaacttacaaagaagaacgtgtacatgctagcaaggtgcttccaaaaccagctgccttcaactttgaaggagacaaggctgaattgattgaaaagatccgtcaagccctttacttctcaaaaatcatttcatacgcacaaggatttgctcaattgcgtgtagcctctaaagaaaacaactggaacttgccatttgcagatatcgcatctatctggcgtgatggctgtatcatccgttctcgtttcttgcaaaagattacagatgcttacaaccgcgatgcagatcttgccaaccttcttttggacgagtacttcttggatgttactgctaagtaccaacaagcagtacgtgatatcgtagctcttgcggttcaagcaggtgtgccagtgccaactttctcagcagctattacttactttgatagctaccgttcagctgaccttccagctaacttgatccaagcacaacgtgactactttggtgctcacacttaccaacgtaaagacaaagaaggaaccttccactactcttggtatgacgaaaaataa
>VFDBC~~~clpP~~~47~~~ATP_dependent_CLP_protease_proteolytic_subunit Streptococcus_pneumoniae_R6
atgattcctgtagttattgaacaaacaagccgtggagaacgttcttacgatatttactcacgtcttctcaaagaccgcatcattatgctgacaggtccggttgaagacaatatggctaactctgttattgcccaactgcttttcttggatgcccaagatagtacaaaagatatttacctttatgtcaatacaccaggtggttctgtttcagctggtttggcaatcgtagataccatgaactttatcaaggcagatgtccaaaccattgttatgggaatggctgcatctatgggaacagtcatcgcatcaagtggagcaaaaggcaaacgtttcatgcttccaaatgctgaatacatgattcaccaaccaatgggcggtacaggtggtggtacccaacaaactgatatggctatcgctgcagaacacttgctcaaaactcgtaataccttggaaaaaatcttggctgaaaattcaggtcagtcaatggaaaaagtccatgcagatgcagaacgtgataactggatgagcgcccaggaaacacttgaatatggctttattgatgaaattatggccaacaattcattgaactaa
>VFDBC~~~ppmA~~~48~~~Proteinase_maturation_protein Streptococcus_pneumoniae_R6
atgaagaaaaaattattggcaggtgccatcacactattatcagtagcaactttagcagcttgttcgaaagggtcagaaggagcagaccttatcagcatgaaaggggatgtcatcacagaacatcaattttatgagcaagtgaaaaacaacccttcagcccaacaagtcttgttaaatatgaccatccaaaaagtttttgaaaaacaatatggctcagagcttgatgataaagaggttgatgatactattgccgaagaaaaaaaacaatatggcgaaaactaccaacgtgtcttgtcacaagcaggtatgactcttgaaacacgtaaagctcaaattcgtacaagtaaattagttgagttggcagttaagaaggtagcagaagctgaattgacagatgaagcctataagaaagcctttgatgagtacactccagatgtaacggctcaaatcatccgtcttaataatgaagataaggccaaagaagttctcgaaaaagccaaggcagaaggtgctgattttgctcaattagccaaagataattcaactgatgaaaaaacaaaagaaaatggtggagaaattacctttgattctgcttcaacagaagtacctgagcaagtcaaaaaagccgctttcgctttagatgtggatggtgtttctgatgtgattacagcaactggcacacaagcctacagtagccaatattacattgtaaaactcactaagaaaacagaaaaatcatctaatattgatgactacaaagaaaaattaaaaactgttatcttgactcaaaaacaaaatgattcaacatttgttcaaagcattatcggaaaagaattgcaagcagccaatatcaaggttaaggaccaagccttccaaaatatctttacccaatatatcggtggtggagattcaagctcaagcagtagtacatcaaacgaatag
>VFDBC~~~pvaA~~~50~~~Conserved_hypothetical_protein Streptococcus_pneumoniae_R6
atgtttaaacgaattcgaagagtgcttgtactagcagtcttcctttttgctggctataaagcttaccgcgttcatcaagatgtcaaacaagtcatgacctatcaacccatggtgcgagaaatgttgagtgaaaaagacaccccagcaaacgaagagcttgtgcttgctatgatttatactgaaacaaaaggaaaagaaggcgatgttatgcagtctagtgagtctgcaagtggttccaccaacaccatcaatgataatgcctctagcattcggcaaggcattcaaactctgacaggcaatctctatctggcgcagaagaagggtgtagatatctggacagctgttcaagcctataattttggacctgcctatatcgattttatcgcccaaaatggcaaggaaaataccttggctctagccaaacagtactctcgtgagactgttgcccccttgcttggtaataggactggaaagacttatagttatattcaccccatttccatttttcacggtgctgaactctatgtaaatggaggaaactattattattctagacaggtacgacttaacctttacatcatcaaatgtttcactctcttttcaacatctggctag
>VFDBC~~~eng~~~51~~~LPXTG_motif Streptococcus_pneumoniae_TIGR4
atgaataaaggattatttgaaaaacgttgtaaatatagtattcggaaattttcattaggtgttgcttctgttatgattggagctgcattctttgggacaagtccggttcttgcagatagcgtgcagtctggttccacggcgaacttaccagctgatttagctactgctcttgcaacagcaaaagagaatgatgggcgtgattttgaagcgcctaaggtgggagaagaccaaggttctccagaagttacagatggacctaagacagaagaagaactattagcacttgaaaaagaaaaaccggctgaagaaaaaccaaaagaggataaacctgcagctgctaaacctgaaacacctaagacggtaacccctgaatggcaaacggtagcgaataaagagcaacagggaacagtcactatccgagaagaaaaaggtgtccgctacaaccaactatcctcaactgctcaaaatgataacgcaggcaaaccagccctgtttgaaaagaagggcttgaccgttgatgccaatggaaatgcaactgttgatttaaccttcaaagatgattctgaaaagggcaaatcacgctttggtgtctttttgaaatttaaagataccaagaataatgtttttgtcggttatgacaaggatggctggttctgggagtataaatctccaacaactagcacttggtatagaggtagtcgtgttgctgctcctgaaacaggatcaacaaaccgtctctctatcactctcaagtcagacggtcagctaaatgccagcaataatgatgtcaatctctttgacacagtgactctaccagctgcggtcaatgaccatcttaaaaatgagaagaagattcttctcaaggcgggctcttatgacgatgagcgaacagttgttagcgttaaaacggataaccaagagggggtaaaaacagaggatacccctgctgaaaaagaaacaggtcctgaagttgatgatagcaaggtgacttatgacacgattcagtctaaggtcctcaaagcagtgattgaccaagccttccctcgtgtcaaggaatacagcttgaacgggcatactttgccaggacaggtgcaacagttcaaccaagtctttatcaataaccaccgaatcacccctgaagtcacttataagaaaatcaatgagacaacagcagagtacttgatgaagcttcgcgatgatgctcacttaatcaatgcggaaatgacagtacgcttgcaagttgtagacaatcaattgcactttgatgtgactaagattgtcaaccacaatcaagtcactccaggtcaaaagattgatgacgaaagcaaactactttcttctattagtttcctcggcaatgctttagtctctgtttctagtaatcaaactggtgctaagtttgatggggcaaccatgtcaaacaatacgcatgtcagcggagatgatcatatcgatgtaaccaatccaatgaaggatttggctaagggttacatgtatggatttgtttctacagataagcttgctgctggtgtttggagtaactctcaaaacagctatggtggtggttcgaatgactggactcgtttgacagcttataaagaaacagtcggaaatgccaactatgtaggaatccacagctctgaatggcaatgggaaaaagcttataagggcattgttttcccagaatacacgaaggaacttccaagtgctaaggttgttatcactgaagatgccaatgcagacaagaacgttgattggcaagatggtgccattgcttatcgtagcattatgaacaatcctcaaggttgggaaaaagttaaggatatcacagcttaccgtatcgcgatgaactttggttctcaagcacaaaacccattccttatgaccttggatggtatcaagaaaatcaatctccatacagatggtcttgggcaaggtgttctccttaaaggatatggtagcgaaggccatgactctggtcacttgaactatgctgatattggtaagcgtatcggtggtgtcgaagacttcaagaccctaattgagaaggctaagaaatatggagctcatctaggtatccacgttaacgcttcagaaacttatcctgagtctaaatacttcaatgaaaaaattctccgtaagaatccagatggaagctatagctatggttggaactggctagatcaaggtatcaacattgatgctgcctatgacctagctcatggtcgtttggcacgttgggaagatttgaagaaaaaacttggtgacggtctcgactttatctatgtggacgtttggggtaatggtcaatcaggtgataacggtgcctgggctacccacgttcttgctaaagaaattaacaaacaaggctggcgctttgcgatcgagtggggccatggtggtgagtacgactctaccttccatcactgggcagctgacttgacctacggtggctacaccaataaaggtatcaacagtgccatcacccgctttatccgtaaccaccaaaaagatgcttgggtaggggactacagaagttatggtggtgcagccaactatccactgctaggtggctacagcatgaaagactttgaaggctggcagggaagaagtgactacaatggctatgtaaccaacttatttgcccatgacgtcatgactaagtacttccaacacttcactgtaagtaaatgggaaaatggtacaccggtgactatgaccgataacggtagcacctataaatggactccagaaatgcgagtggaattggtagatgctgacaataataaagtagttgtaactcgtaagtcaaatgatgtcaatagtccacaatatcgcgaacgtacagtaacgctcaacggacgtgtcatccaagatggttcagcttacttgactccttggaactgggatgcaaatggtaagaaactttctactgataaggaaaagatgtactacttcaatacgcaggccggtgcaacaacttggacccttccaagcgattgggcaaagagcaaggtttacctttacaagctaactgaccaaggtaagacagaagagcaagaactaactgtaaaagatggtaaaattaccctagatcttctagcaaatcaaccatacgttctctatcgttcgaaacaaactaatcctgaaatgtcatggagtgaaggcatgcacatctatgaccaaggatttaatagcggtaccttgaaacattggaccatttcaggcgatgcttctaaggcagaaattgtcaagtctcaaggggcaaacgatatgcttcgtattcaaggaaacaaagaaaaagttagtctcactcagaaattaactggcttgaaaccaaataccaagtatgccgtttatgttggtgtagataaccgtagtaatgccaaggcaagtatcactgtgaatactggtgaaaaagaagtgactacttataccaataagtctctcgcgctcaactatgttaaggcctacgcccacaatacacgtcgtgacaatgctacagttgacgatacaagttacttccaaaacatgtacgccttctttacaactggagcggacgtctcaaatgttactctgacattgagtcgtgaagctggtgatcaagcaacttactttgatgaaattcgtacctttgaaaacaattcaagcatgtacggagacaagcatgatacaggtaaaggcaccttcaagcaagactttgaaaatgttgctcagggtatcttcccatttgtagtgggtggtgtcgaaggtgttgaagataaccgcactcacttgtctgaaaaacacaatccatatacacaacgtggttggaatggtaagaaagtcgatgatgttatcgaaggaaattggtcactcaagacaaatggactagtgagccgtcgtaacttggtttaccaaaccatcccacaaaacttccgttttgaagcaggtaagacctaccgtgtaacctttgaatacgaagcaggatcagacaatacctatgcttttgtagtcggtaagggagaattccagtcaggtcgtcgtggtactcaagcaagcaacttggaaatgcatgaattgccaaatacttggacagattctaagaaagccaagaaggcaaccttccttgtgacaggtgcagaaacaggcgatacttgggtaggtatctactcaactggaaatgcaagtaatactcgtggtgattctggtggaaatgccaacttccgtggttataacgacttcatgatggataatcttcaaatcgaagaaattaccctaacaggtaagatgttgacagaaaatgctctgaagaactacttgccaacggttgccatgactaactacaccaaagagtctatggatgctttgaaagaggcggtctttaacctcagtcaggccgatgatgatatcagtgtggaagaagcgcgtgcagagattgccaagattgaagctttgaagaatgctttggttcagaagaagacggctttggtagcagatgactttgcaagtcttacagctcctgctcaggctcaagaaggtcttgcaaatgcctttgatggcaatgtgtctagtctatggcatacatcttggaatggtggagatgtaggcaagcctgcaactatggtcttgaaagaaccaactgaaatcacaggacttcgctatgttccgcgtggatcaggttcaaatggtaacttgcgagatgtgaaacttgttgtgacagatgagtctggcaaggagcatacctttactgcaactgattggccaaataacaacaaaccaaaagatattgactttggtaagacaatcaaggctaagaaaattgtccttactggtaccaagacatacggagatggtggagataaataccaatctgcagcggaacttatctttactcgtccacaggtagcagaaacacctcttgacttgtcaggctatgaagcagctttggttaaggctcagaaattaacagacaaagacaatcaagaggaagtagctagcgttcaggcaagcatgaaatatgcgacggataaccatctcttgacggaaagaatggtggaatactttgcagattatctcaaccaattaaaagattctgctacgaaaccagatgctccaactgtagagaaacctgagtttaaacttagatctttagcttccgagcaaggtaagacgccagattataagcaagaaatagctagaccagaaacacctgaacaaatcttgccagcaacaggtgagagtcaatctgacacagccctcatcctagcaagtgttagtctagccctatctgctctctttgtagtaaaaacgaagaaagactag
>VFDBC~~~StkP/pknB~~~52~~~Stk1_family_PASTA_domain_containing_Ser/Thr_kinase Streptococcus_pneumoniae_TIGR4
ttaaggagtagctgaagttgttttaggtttgtagattgaaatcttgactctagtcttattgaggtctaccttttcacctgctctaggactttgttcaacaaccatgccttctgcactacctgcaggcgctgtcgtcacttctacaacttctatattagcttccttaatcccaacaatttgaatcaaattgttcttagtaaactccaagctagaaccaatgtaactcggcatggcaacacttgtaacttttttagctactgtcaagacaatttgagtaggtttactcacatcataagtcgttccggcacctggactttgtttcataatcgttcctggttcgctttcgctggactcttcttcctctatcttaatcaaattctcaggaaccttcttctgcttgagttctgagattacttctgtagagttccgtccaatatagttccctaattgaatcgtcgtagcttttttagctactgtcaaaacaatttgagttgccttgctcaagtcataggtcgtaccttctggtagactttgcttcaggaccgttccagcctcactctcattcgactcttcttcctcaattttaatcaaattatctggaacttttttctcttttaattccgcaatgacatcagaggatttccgaccgacataattactaatttggaaagattgcttgcctgatgagacaaccaaattgattttcgttccttcttttcgaccagttccagcgccaggatctgtacggataatccgcccttcttccaccttttcactagcctctgtcttctcctcaccaatctcaaaattggcttttttgagcgttgccttggcctctgcaactgtctgacctgccacatctggaatggcaatggttgcaggagttctggatagtatccaaataagagaagctgccaccaatacaaggctggccaacaaaatcaggtaacgcatcttaaatctatgttttttcggtgcttgtggttggtaagtttcctctgtcacagcctggcttgggtttttgattgatttgtgttctgtttgcgcttgaaccttaggaatagatgtcaaggtactctgagaaaccttcggcaaggtcttggtatctgccttgctcgtttcatcaaagattaacttactttcatttctacgattgtaggacaagctactagacaagtccacatacatctctgaaaccgagcggtagcgattggtcaactttttagcagttgccttgataataacattttctaaagcctgaggtacagatggattttctgcaataacggacggcaggggtttctggaaatgctggagggcaatggtcaccgcgctatccccgtcataagggatatggcctgtcagcatctcatagaaaataatccccatggcatagatatcactctgcacagtcgccttcgaaccacgcgcctgctctggtgacaagtaatgaactgagcccaacatcgagttagtctgggtcagacttgtctctgcaaaggctacagcaatcccaaagtctgtgaccttggcagtcccatctggtgtcaagaggatattttgaggtttcaagtccctgtgaacaattcctcgagtatgggccaagcgcatagccaagagaatttgtcccatgatacggactgcttcttcattagaaagaggataatgttccttgatatagcgtttgaggtccagtccagccacatactccatagctaggtactgttgaccgtcttcctcgccaatatctgttatccgaacgatatgaggatggtctagatctgccatagctctcgcttcacgctgaaaacgagctacagctatcgggtccgtctggtagttggtcctcagaaccttcactgccacttcttccccatctaagattaagtctttggctaggtagacatccgccatacctcctcgaccaatctgtttgacaatccgatagcgtccggcaaaaatcttgccgatttggatcat
>VFDBC~~~pcpA~~~53~~~choline_binding_protein_PcpA Streptococcus_pneumoniae_TIGR4
ctatcctacccactcaccgttagcattgactcgatagccatcgggtgtagtcgtgtttactaataaatctcctgaattataggtatagtaccatttaccagaaactgtaacccaaccagtagccattgaacctgattcatttaagtaataccataagcctttgtctttaacccaaccagtagccattgaacctgattcatttaagtagtaccataagcctttgtctttaacccaaccagtagccattgaacctgattcgtttaagtaataccataagcctttgtctttaacccaaccagtagccattgaacctgattcatttaagtagtaccataagcctttgtctttaacccaaccagtagccattgaacctgattcgtttaagtaataccataaacctttgtctttaacccaaccagtagccattgaacctgattcgtttaagtaataccataaacctttgtctttaacccaaccaactactccctgattagaattctttttaggtttagctacatcagtttcttgttttatattatctactttttcaacaatgatatcattactagtagataaatttgatttaagaacatcttttatatgttctgatgttacatagaacttaacagtttcaggaattgcaaatgtatcttttttcacagaaaactctgtacttttattcttaatatgaatttcctttaatgaatctaagacgccacttaggaagaaggacggcaatgagttgatattattaccaattgttaaactttttaattttggtaaaccgttcataacgtgtttaccaaaatttttaacattatctggtaatataagttcttttaattctaaattaccgtaaaaggctaaacgttcaatagtttctaaactatttggtaagctaatttcttcaagtttaatcgcatctgcaaatgcaaaagtaccgattttttctaaaccttcattcaattcgagttttttcaagtaagaatttttattaaacgaatatgatgcaagttcttttgtctccttaggcgttttataactttcgtcatttttttgacttggataataaattaattgggttttatcttttgaaaacaaaacaccatcaactgaggcaaacgattcatttccttcttcaacatcaacatgttttaagctagtagtgagtctaaatagattacttcctaatgttttaaccgattttggtaatgttagtttctctaaatttgataaattagcaaaagcctcatgtgatattaattctaattttgaacttgaggaaaaggttagctttttcaatttttgactaaaagaaaatgcacttgttccaatatattctagagatgcaggcaattcaatctcttctaattcagaaaaatcaaaagctctatcttcaattttctccagctgactgcctttgtcaaaaataatagttttagctttacttccatggaagccttttttttgtattttttttatgcttgatgggatagtaatagagctaggatagtagacaattctacctgtttcatctggataataactaaaagcttgactagctacttcagtaacggtaaatactttatcacctactgtgatttttgtaggaatcgtgaatggttttccatcttgaccagcttcaaactctacaggagtaactccattacccacttgaacagttcctatgttaccttctacagttagaaccttatatttgatattattttgttgaataatacttccaactttagtctctttgattacttccgaactaggagtatctgctaggattggttcattagggacatatgctgctaaaataaccgcagctgtagttaatgataatattgtagtttttttcat
>VFDBC~~~pcsB~~~54~~~CHAP_domain_containing_protein Streptococcus_pneumoniae_TIGR4
ttaatctgcataaatatatgtaacaaaaccttcagaagttgttgttggattgaaccatccacggtgatttccaattgtacgattacctgcataatttgattctgatacttggatacgtgttgttgattcaacagctgtaacaaccgctacgtgaccatatccaccatcattccaacatgcaattgctccaacttgaggtgttgaacctgtacggaaacctgctgctgctgcacttgtagcccactgtgctccattaccccagtagtctccagcccaaggtgccaatgtttttactccccatgtacattctccaattggataacttgaagcgtttgtactgtatgttggacgaacttttgcacggacaggtgctgctgcagattcagatactgcttgcacttgagctgttaagttagtgtttgctgaagcaagtactgattgttgttggctagctcgtttttctttataagctgcttctgctaccgcagctgcacgagcctctgcctcagctgctgctttttgctctaatagacttgctttttccccttcagctgtcgctttctcagcagcaagacttaattcagcagcttttagttctgcctgtttcgtagtcaatgcttgagcatcatcagccaatttttgttgattagcaattacagtattgatagcatcattatttgctacttgtttttcagaaatagcttttttatctgccttttgttgttctaacattttgttgtttgcagatacgatttcactcattgcagcaacacgtgaaatagcttctgtaattgattttgagtttacaatggtattgatatagctagttacggctccatttgtttgagcactacgagcttgtttttccaacgattggttacgagaaacaatgtttttagaaagttctgtaatctcaccctcgagtttcttagattctgcttgtaatctatcattttcagcttgcaagttagactgctcagcttgaatagctgatacttgctcctgaatttggtcaacttgtttttgggcttcttgttgttgtgctgttaagttactaattttattatcttgagcagcaattttgtcatcagtcgtttctgcatgcgcagttgttaaaacagctacttgagaaaccattactgtacttaataaaagtgacgctaagatttttttcttcat
>VFDBC~~~potD~~~55~~~ABC_transporter_substrate_binding_protein Streptococcus_pneumoniae_TIGR4
ctacttccgatacattttaaactgtaggaagaggtcgctatatttccctgtccatttatggtcaaatttctcataaacttctaggtgtttcatggtttcaacatcgggatagaaggccttatcttcctttgtttcctctgggagcaattccttcgctggtaggtttggtgttgaatagccgacatactccgcattttggagagcattttcaggtttcaacataaagttgataaaggcataggctgagttttggtttttaactgttttgggaatgaccatattgtcaaaccaaagattgctggcctctgtcggtaccacataacgtagattttcatttttttctaacatttggctggcttcaccagagaaggtcacgccgattgcaacattattctgaatcatatagcccttcatctcgtccgcaacgatagccttgatatttggagtcagtttgtagagcttatccactgtctcttccaactgctgcagatccttggagttgaggctgtagccgagggaattgagtcctagtcccagcacctcacgcgccccatcaaagagcatgatagaattcttatactccggcttccaaaggtcatcccaatgctcaggcgcttcatctaccatggtttcgttgtagacaattcctaaggttccccagaagtaagggatggagaatttattacctgggtcaaaggactggttgagaaactctggtccgatattttcgattccttcaatttttgaataatcaagcggaaccaagaggtcttcgtccttcatcttgttaatcatgtattcacttggaatggcaatatcgtaggtcgttccaccctgctttatcttagtgtacatggcttcgttggagtcaaaagtctcgtactgaacttgaattcctgtttcttctgtaaactgagtcaagagttcaggatcgatatagtctccccagttatagataaccaatttttgactatctcgactattgattttactatctaaatgagtcgcaattccccacaagacaaggataatcgctgcaattcctgctaaaaatgaatagatttttttcat
>VFDBC~~~pgdA~~~56~~~polysaccharide_deacetylase_family_protein Streptococcus_pneumoniae_TIGR4
ttattcatcacgactatagtacagctcatgagcttttaggcgagtattgagcatctctggtatggtcacaaaggtataaccttgatttttcaaatactcaatgacccttggcaaggcattgactgtcggactgtgaatatcatgcatcaaaacgatagagccattagctacttgatactgaatttctgtcaaaatagatgcttcatttttactcttccagtccagactatccacatcccacatgataaagctcaaatccaagctattgcgaatatcatctgtaatagcaccataaggtggacgcatgagtttagaactagaacccagcactttagttagcacatcctcagtatcagtaatctgctttttagcttcatcaagagagagttgcgagagaatcggatggctccagctatggtttccaacaacatgaccttcagattttatcctcttcaccaagtcctcattcccagaaacatttttcccaagcacaaagaaagtcgctttaatatcatatttagctagggtctctaatacctgcggggtcgttgctggatttggaccatcatcaaaggttagagcgacaactttttgatgtttcttatcaaagtaagattggtacaaggccgcatctttttcgagtaagtacgaagattggataacatcaaagaaagcagatactggcaaggctatctcttctaaattttcaaccacaggacttggataaaggataatctgactatccttgtaatcaaaattccatgcagacaagtcttggtcagagaagttttttacaatctgctcactctggtcttgctctatttttttatcctctatgaaggaggtcaactcttttatcagctgttccttagccttactagcatctgaaaacagttggtcaagtgtaaaaggttgcccatcttctgttaagtgaacctttcctagactggtcttttcagtctcttcaatcttaaaagcaactaaatcatagatttgtttggtcacattacgattaacgactccctttaaacctgactcttcttgctctgtatagtagaaaacaagattgtccttactttctagcttgtccttaacatcttgatttatcagctccctaacagaggaaatcactttctccccttggagaggataataggcaatcacttcggcttgcccctgacgaaaatgctccttctgatttccctcactcaattgatcatctttctcttttttgagcgattcaatcttttgctcaaaacttttttgctggtagatcttaaaagcaataaatccgcctaataggcaaatagaaattgctaaaataccaatcaaagccaa
>VFDBC~~~strH~~~57~~~beta_N_acetylhexosaminidase Streptococcus_pneumoniae_TIGR4
ttagtcttcttttcttttagtgagtccataggctgctagtgtggacatgagtcctgcgactactagtcctgcagaatcgtgagttcctgtttcaggaagttttttctctgttaccacaggagctggatcttgaggaagaactttgctttcctcagcaggagcagttgatggagctggttggcttgggatttctagttttggtttttcttcagcaatagcggcttgtccgttttcatcgcctacatgtgttaccatagttccgacttcgactatttgagtaacggcttcctgtgctacgacactatttacaagtgttttcacttccttaccatcggcagaagtgctcacagagtagaagttgctacgatgtccattgacgcccttagtaatgacttgtgtttttcctttgagtaagagtggattttcacaagtcactgtggtaaatggaatttcttcttcttggatatccagtctaggttttacctcagtagttggtgcaagaccactttcatcacccttgtgagttacaggagcgccaacttcaaccacttggtttataacttctttggttacctggctatcaaggactgtttctgttgtttttccattttcagtgagtacagagatgtaatgagttcgttcacctttgactcctgctgtgataatattttcctgaccggctgggaggttaggattttctttcttgataacttcaaatggaatttcttcagttcttgtgatgagttctggtctggtttcaacattggcagccacttcattttcatctaggcttcctgaatgagttacagctggtttgaggccttgaagagcggcttttaggttggctacaagcgtgtcaagctcagcttgtttattacggttgaggttgtaatttagagctgttttagctgcgtcaagggcctcaagactttctttactatatccttctaagtttgtaggaattttagctaattcttcgcggagagcattataattagcacgaaagtagtctttgttgtggtctgcaaaggcagtcatgagttcaaagatttcctcttccttgtattcagcgcttggtctatctgcccagattgaaagcatacttccgactgttggaagatctacttcaggatatttggtagaagctagttgattgaatggtgtttttccagtattctcaatagctttcttgaggaaaccaccaccatcttctggtttttgaccaagaatgtagtaccagtcaccgttggtattcaagaatttatagcctttgcttgctaggtattgaggtgatgcgaggttatatccccaccagcctttagaccagtaagaaatcaagacatctttgtcaaactgaacatcgtccttgtcttcatagtagaagccatcgttgaaggccattggttgaagccctctttctttggccatagctgcgagggtgttggcatattcggcaaatttgccatagagttgataccacttgaggtagtaccagccttgggcactagtcgcatcgttggcgtattcgtcagtaccaaagttgaaaatctttgttttacctgcaaagaagtccatgtatttaccgatgagggcttttacaaagttcatcgcttcttcgtttttcaagtccatagttgtttttgaaactttatcaaagtgggcttgaggatttttaatacctaatttttccatggcaaccagcatagcatccatgtgacctggactgttaatagctgggatgagaccgatgtccttagatttagcgtattcaattagctctgttacttctgcctgtgttagtgcagtaccgtttggatcgtcgtagtaagctttagttccttcgataatagcttttttaacgtcatcactagcataggtttttccgttggcagtaatggtcatatcatcgagtagaaagcgaagtccgtcatttcctagaaggagatggacatcagaatatccgagctcactggccttgtctacgatgcgtttgagctggttcagagtaaagtatttgcgtccagcatcgattgagattaccttgtttttggcaagtttttcaacctcacgtttagcttcttcttctttttgagcttcaggcgtgagggtcaagttgttgacagtttcttgaagtttagcaatggcttgatcaatcgtatcttgttgggcacggctaaggttgctatcgagagagcgaatagctttttcagcttcttttacggccgtgacgctttctgcagtataacggttcaggtcttttggtacctcgttaagtgcttgctctgcagattcataatcagctgcgaagtattcagcgttggcatttgcaaaatgacgcatgagtttgaagaggcgtgatggtgaataacgtgcagatggagtgtcagcccaagcagctaccataccaccgatgattgggatatcagctccttctgtttttggtacagaagtgattggtgtgtttttaataccattgagcccctgatcgagattgtaccagccttggccatcagcgtttcgtccaagaacgtagtaccaagcatcattggtattaaggatttggtgacctttttcagctagtagtttagaagaagcgacatcgtagcctccccaaccaccagtccacatagaaacgatgatgtctttgtcaaaactaccaaagcttgtgtcgctattgtagtagataccgtcgttaaaagccattggtttgagaccgtgcgattttacaatacgagcgaggtcattggcgtaggcaataaatttttcatagccttttacagggtagccttcgtttggatagtatttatcagcttgaagcacactccaacctttagcatctgtcgcatcattggcatattcatcaagtccgatgttgaagatttcagtctttttcgcgaaataagcagcatacttgtcgataagggcttttgtaaaagcgacagcttgttcgttgtcaagatcgacagtacgggctgatttcttcccaaaatagctaaagttagggttttggattcccaattctttcatggcattgagaatcgcatccatgtgtccaggactatttactgtcggaatgagaccgatacctttatctttggcatagttaatcagatctgtcatttgactttctgttaagtgattgccgtttggatcgttgtaataatcatttgtacctttttcaatggcgcgtttgacatcgtcactggcataggtcttgccgttagctgtgatgctcatatcgtccaacatgaaacggagtccatcatttccgactaataggtgtaaatcagtgtagccataatgtttcgctttatcgatgatttccttgagctgttctggtgagaaatatttacgtccagcatcaatagaaacaattttctttttcgctagtttttcatttacagttgcagcacgttcctttcctgcctctgttgccggtttgtcagcctctgctttcgcttcatcttttttagctggtttatccttgtcagtcttgtctgtatttgactctttagaatcaacctctttcgcttcttcctttttagggctagcttcttctgcctttttattagcagtttctttttcagcagaagttggagttaccacttctgctttatcactaggagttgaactaacttcctcttgtggtttttcttctgtttttggaagactagctaccttatcagtagctggagtttctgtttctacagtttttggagcttctggttgaagcactgctttaggtgtttcctcagtccgattttcggatgattgaggggaatcagaaaccgtatggatggtcggttggttttctgtagtagtaggagtaactccatcggctgcaacagtctgtgcttggaaggcaaatccaattagaacagaagctgctcctacagcgtatttacgaatagaaaaacgctgttgtttttcatgtttcat
>VFDBC~~~bgaA~~~58~~~Ig_like_domain_containing_protein Streptococcus_pneumoniae_TIGR4
atggggaaaggccattggaatcggaaaagagtttatagcattcgtaagtttgctgtgggagcttgctcagtaatgattgggacttgtgcagttttattaggaggaaatatagctggagaatctgtagtttatgcggatgaaacacttattactcatactgctgagaaacctaaagaggaaaaaatgatagtagaagaaaaggctgataaagctttggaaactaaaaatatagttgaaaggacagaacaaagtgaacctagttcaactgaggctattgcatctgagaagaaagaagatgaagccgtaactccaaaagaggaaaaagtgtctgctaaaccggaagaaaaagctccaaggatagaatcacaagcttcaaatcaagaaaaaccgctcaaggaagatgctaaagctgtaacaaatgaagaagtgaatcaaatgattgaagacaggaaagtggattttaatcaaaattggtactttaaactcaatgcaaattctaaggaagccattaaacctgatgcagacgtatctacgtggaaaaaattagatttaccgtatgactggagtatctttaacgatttcgatcatgaatctcctgcacaaaatgaaggtggacagctcaacggtggggaagcttggtatcgcaagactttcaaactagatgaaaaagacctcaagaaaaatgttcgccttacttttgatggcgtctacatggattctcaagtttatgtcaatggtcagttagtggggcattatccaaatggttataaccagttctcatatgatatcaccaaataccttcaaaaagatggtcgtgagaatgtgattgctgtccatgcagtcaacaaacagccaagtagccgttggtattcaggaagtggtatctatcgtgatgtgactttacaagtgacagataaggtgcatgttgagaaaaatgggacaactattttaacaccaaaacttgaagaacaacaacatggcaaggttgaaactcatgtgaccagcaaaatcgtcaatacggacgacaaagaccatgaacttgtagccgaatatcaaatcgttgaacgaggtggtcatgctgtaacaggcttagttcgtacagcgagtcgtaccttaaaagcacatgaatcaacaagcctagatgcgattttagaagttgaaagaccaaaactctggactgttttaaatgacaaacctgccttgtacgaattgattacgcgtgtttaccgtgacggtcaattggttgatgctaagaaggatttgtttggttaccgttactatcactggactccaaatgaaggtttctctttgaatggtgaacgtattaaattccatggagtatccttgcaccacgaccatggggcgcttggagcagaagaaaactataaagcagaatatcgccgtctcaaacaaatgaaggagatgggagttaactccatccgtacaacccacaaccctgctagtgagcaaaccttgcaaatcgcagcagaactaggtttactcgttcaggaagaggcctttgatacgtggtatggtggcaagaaaccttatgactatggacgtttctttgaaaaagatgccactcacccagaagctcgaaaaggtgaaaaatggtctgattttgacctacgtaccatggtcgaaagaggcaaaaacaaccctgctatcttcatgtggtcaattggtaatgaaataggtgaagctaatggtgatgcccactctttagcaactgttaaacgtttggttaaggttatcaaggatgttgataagactcgctatgttaccatgggagcagataaattccgtttcggtaatggtagcggagggcatgagaaaattgctgatgaactcgatgctgttggatttaactattctgaagataattacaaagcccttagagctaagcatccaaaatggttgatttatggatcagaaacatcttcagctacccgtacacgtggaagttactatcgccctgaacgtgaattgaaacatagcaatggacctgagcgtaattatgaacagtcagattatggaaatgatcgtgtgggttgggggaaaacagcaaccgcttcatggacttttgaccgtgacaacgctggctatgctggacagtttatctggacaggtacggactatattggtgaacctacaccatggcacaaccaaaatcaaactcctgttaagagctcttactttggtatcgtagatacagccggcattccaaaacatgacttctatctctaccaaagccaatgggtttctgttaagaagaaaccgatggtacaccttcttcctcactggaactgggaaaacaaagaattagcatccaaagtagctgactcagaaggtaagattccagttcgtgcttattcgaatgcttctagtgtagaattgttcttgaatggaaaatctcttggtcttaagactttcaataaaaaacaaaccagcgatgggcggacttaccaagaaggtgcaaatgctaatgaactttatcttgaatggaaagttgcctatcaaccaggtaccttggaagcaattgctcgtgatgaatctggcaaggaaattgctcgagataagattacgactgctggtaagccagcggcagttcgtcttattaaggaagaccatgcgattgcagcagatggaaaagacttgacttacatctactatgaaattgttgacagccaggggaatgtggttccaactgctaataatctggttcgcttccaattgcatggccaaggtcaactggtcggtgtagataacggagaacaagccagccgtgaacgctataaggcgcaagcagatggttcttggattcgtaaagcatttaatggtaaaggtgttgccattgtcaaatcaactgaacaagcagggaaattcaccctgactgcccactctgatctcttgaaatcgaaccaagtcactgtctttactggtaagaaagaaggacaagagaagactgttttggggacagaagtgccaaaagtacagaccattattggagaggcacctgaaatgcctaccactgttccgtttgtatacagtgatggtagccgtgcagaacgtcctgtaacctggtcttcagtagatgtgagcaagcctggtattgtaacggtgaaaggtatggctgacggacgagaagtagaagctcgtgtagaagtgattgctcttaaatcagagctaccagttgtgaaacgtattgctccaaatactgacttgaattctgtagacaaatctgtttcctatgttttgattgatggaagtgttgaagagtatgaagtggacaagtgggagattgccgaagaagataaagctaagttagcaattccaggttctcgtattcaagcgaccggttatttagaaggtcaaccaattcatgcaacccttgtggtagaagaaggcaatcctgcggcacctgcagtaccaactgtaacggttggtggtgaggcagtaacaggtcttactagtcaaaaaccaatgcaataccgcactcttgcttatggagctaagttgccagaagtcacagcaagtgctaaaaatgcagctgttacagttcttcaagcaagcgcagcaaacggcatgcgtgcgagcatctttattcagcctaaagatggtggccctcttcaaacctatgcaattcaattccttgaagaagcgccaaaaattgctcacttgagcttgcaagtggaaaaagctgacagtctcaaagaagaccaaactgtcaaattgtcggttcgagctcactatcaagatggaacgcaagctgtattaccagctgataaagtaaccttctctacaagtggtgaaggggaagtcgcaattcgtaaaggaatgcttgagttgcataagccaggagcagtcactctgaacgctgaatatgagggagctaaagaccaagttgaactcactatccaagccaatactgagaagaagattgcgcaatccatccgtcctgtaaatgtagtgacagatttgcatcaggaaccaagtcttccagcaacagtaacagttgagtatgacaaaggtttccctaaaactcataaagtcacttggcaagctattccgaaagaaaaactagactcctatcaaacatttgaagtactaggtaaagttgaaggaattgaccttgaagcgcgtgcaaaagtctctgtagaaggtatcgtttcagttgaagaagtcagtgtgacaactccaatcgcagaagcaccacaattaccagaaagtgttcggacatatgattcaaatggtcacgtttcatcagctaaggttgcatgggatgcgattcgtccagagcaatacgctaaggaaggtgtctttacagttaatggtcgcttagaaggtacgcaattaacaactaaacttcatgttcgcgtatctgctcaaactgagcaaggtgcaaacatttctgaccaatggaccggttcagaattgccacttgcctttgcttcagactcaaatccaagcgacccagtttcaaatgttaatgacaagctcatttcctacaataaccaaccagccaatcgttggacaaactggaatcgtactaatccagaagcttcagtcggtgttctgtttggagattcaggtatcttgagcaaacgctccgttgataatctaagtgtcggattccatgaagaccatggagttggtgtaccgaagtcttatgtgattgagtattatgttggtaagactgtcccaacagctcctaaaaaccctagttttgttggtaatgaggaccatgtctttaatgattctgccaactggaaaccagttactaatctaaaagcccctgctcaactcaaggctggagaaatgaaccactttagctttgataaagttgaaacctatgctgttcgtattcgcatggttaaagcagataacaagcgtggaacgtctatcacagaggtacaaatctttgcgaaacaagttgcggcagccaagcaaggacaaacaagaatccaagttgacggcaaagacttagcaaacttcaaccctgatttgacagactactaccttgagtctgtagatggaaaagttccggcagtcacagcaagtgttagcaacaatggtctcgctaccgtcgttccaagcgttcgtgaaggtgagccagttcgtgtcatcgcgaaagctgaaaatggcgacatcttaggagaataccgtctgcacttcactaaggataagagcttactttctcataaaccagttgctgcggttaaacaagctcgcttgctacaagtaggtcaagcacttgaattgccgactaaggttccagtttacttcacaggtaaagacggctacgaaacaaaagacctgacagttgaatgggaagaagttccagcggaaaatctgacaaaagcaggtcaatttactgttcgaggccgtgtccttggtagtaaccttgttgctgagatcactgtacgagtgacagacaaacttggtgagactctttcagataaccctaactatgatgaaaacagtaaccaggcctttgcttcagcaaccaatgatattgacaaaaactctcatgaccgcgttgactatctcaatgacggagatcattcagaaaatcgtcgttggacaaactggtcaccaacaccatcttctaatccagaagtatcagcgggtgtgattttccgtgaaaatggtaagattgtagaacggactgttacacaaggaaaagttcagttctttgcagatagtggtacggatgcaccatctaaactcgttttagaacgctatgtcggtccagagtttgaagtgccaacctactattcaaactaccaagcctacgacgcagaccatccattcaacaatccagaaaattgggaagctgttccttatcgtgcggataaagacattgcagctggtgatgaaatcaacgtaacatttaaagctatcaaagccaaagctatgagatggcgtatggagcgtaaagcagataagagcggtgttgcgatgattgagatgaccttccttgcaccaagtgaattgcctcaagaaagcactcaatcaaagattcttgtagatggaaaagaacttgctgatttcgctgaaaatcgtcaagactatcaaattacctataaaggtcaacggccaaaagtctcagttgaagaaaacaatcaagtagcttcaactgtggtagatagtggagaagatagctttccagtacttgttcgcctcgtttcagaaagtggaaaacaagtcaaggaataccgtatccacttgactaaggaaaaaccagtttctgagaagacagttgctgctgtacaagaagatcttccaaaaatcgaatttgttgaaaaagatttggcatacaagacagttgagaaaaaagattcaacactgtatctaggtgaaactcgtgtagaacaagaaggaaaagttggaaaagaacgtatctttacagcgattaatcctgatggaagtaaggaagaaaaactccgtgaagtggtagaagttccgacagaccgcatcgtcttggttggaaccaaaccagtagctcaagaagctaaaaaaccacaagtgtcagaaaaagcagatacaaaaccaattgattcaagtgaagctagtcaaactaataaagcccagttaccaagtacaggtagtgcggcaagccaagcagcagtagcagcaggtttaactcttctaggtttgagtgcaggattagtagttactaaaggtaaaaaagaagactag
>VFDBC~~~pppA~~~59~~~DNA_starvation/stationary_phase_protection_protein Streptococcus_pneumoniae_TIGR4
ttacaaaccaggtgcttgtccaagttcggctgcaagcatccaaattgttttatctgtttcagttttagcgcctgcaaagataccgtttgtcacatcgtcaccttcttcatcagtgacatccaaacctttttggaaaagttctgacaagtaacggtagataacaagaacacgttccaagctttcttcaacattacggtattcaccagcttcttcttcgatttcactattttgaaggaactctgtcaatgtagagaatgggcttccaccgagtgtaatcaagcgttcactgatttcatccaattgaccgtcaagagcttccatgtactcatccatttttggatgccatacaaggaaaccacgaccatgcatataccagtgcacttggtgcaaagcaacgtgagctacatacaaatcagcaacagcttggttcaagacttcctttgtttttgccaatgctactggcgctgcttttgtcaatgatgttacgtcttttactgcttcttttttcaattctaccat
>VFDBC~~~pavB/pfbB~~~60~~~cell_wall_surface_anchor_family_protein Streptococcus_pneumoniae_R6
ATGAAATTCAATCCAAATCAAAGATATACTCGTTGGTCTATTCGCCGTCTCAGTGTCGGTGTTGCCTCAGTTGTTGTGGCTAGTGGCTTCTTTGTCCTAGTTGGTCAACCAAGTTCTGTACGTGCCGATGTGGTCAATCCGACCCCAGGTCAAGTCTTACCTGAAGAGACATCGGGAACGAAAGAGGGTGACTTATCAGAAAAACCAGGAGACACCGTTCTCACTCAAGCGAAACCTGAGGGCGTTACTGGAAATACAAATTCACTTCCGACACCTACAGAAAGAACTGAAGTGAGCGAGGAAACAAACTCTTCTAGTCTGGATACACTTTTTGAAAAAGATGAAGAAGCTCAAAAAAATCCAGAGCTAACAGATGTCTTAAAAGAAACTGTAGATACAGCTGATGTGGATGGGACACAAGCAAGTCCAGCAGAAACTACTCCTGAACAAGTAAAAGGTGGAGTGAAAGAAAATACAAAAGACAGCATCGATGTTCCTGCTGCTTATCTTGAAAAAGCTGAAGGGAAAGGTCCATTCACTGCCGGTGTAAACCAAGTAATTCCTTATGAACTATTCGCTGGTGATGGTATGTTAACTCGTCTATTACTAAAAGCTTCGGATAATGCTCCTTGGTCTGACAATGGTACTGCTAAAAATCCTGCTTTACCTCCTCTTGAAGGATTAACAAAAGGGAAATACTTCTATGAAGTAGACTTAAATGGCAATACTGTTGGTAAACAAGGTCAAGCTTTAATTGATCAACTTCGCGCTAATGGTACTCAAACTTATAAAGCTACTGTTAAAGTTTACGGAAATAAAGACGGTAAAGCTGACTTGACTAATCTAGTTGCTACTAAAAATGTAGACATCAACATCAATGGATTAGTTGCTAAAGAAACTGTCGAAAAAGCCGTTGCAGACAACGTTAAAGACAGTATCGATGTTCCAGCAGCCTACCTAGAAAAAGCCAAGGGTGAAGGTCCATTCACAGCAGGTGTCAACCATGTGATTCCATACGAACTCTTCGCAGGTGATGGCATGTTGACTCGTCTCTTGCTCAAGGCATCTGACAAGGCACCATGGTCAGATAACGGTGACGCTAAAAACCCAGCTCTATCTCCACTAGGCGAAAACGTGAAGACCAAAGGTCAATACTTCTATCAAGTAGCCTTGGACGGAAATGTAGCTGGCAAAGAAAAACAAGCGCTCATTGACCAGTTCCGAGCAAATGGTACTCAAACTTACAGCGCTACAGTCAATGTCTATGGTAACAAAGACGGTAAACCAGACTTGGACAACATCGTAGCAACTAAAAAAGTCACTATTAACATAAACGGTTTAATTTCTAAAGAAACAGTTCAAAAAGCCGTTGCAGACAACGTTAAAGACAGTATCGATGTTCCAGCAGCCTACCTAGAAAAAGCCAAGGGTGAAGGTCCATTCACAGCAGGTGTCAACCATGTGATTCCATACGAACTCTTCGCAGGTGATGGCATGTTGACTCGTCTCTTGCTCAAGGCATCTGACAAGGCACCATGGTCAGATAACGGTGACGCTAAAAACCCAGCTCTATCTCCACTAGGCGAAAACGTGAAGACCAAAGGTCAATACTTCTATCAAGTAGCCTTGGACGGAAATGTAGCTGGCAAAGAAAAACAAGCGCTCATTGACCAGTTCCGAGCAAATGGTACTCAAACTTACAGCGCTACAGTCAATGTCTATGGTAACAAAGACGGTAAACCAGACTTGGACAACATCGTAGCAACTAAAAAAGTCACTATTAACATAAACGGTTTAATTTCTAAAGAAACAGTTCAAAAAGCCGTTGCAGACAACGTTAAGGACAGTATCGATGTTCCAGCAGCCTACCTAGAAAAAGCCAAGGGTGAAGGTCCATTCACAGCAGGTGTCAACCATGTGATTCCATACGAACTCTTCGCAGGTGATGGCATGTTGACTCGTCTCTTGCTCAAGGCATCTGACAAGGCACCATGGTCAGATAACGGTGACGCTAAAAACCCAGCTCTATCTCCACTAGGCGAAAACGTGAAGACCAAAGGTCAATACTTCTATCAAGTAGCCTTGGACGGAAATGTAGCTGGCAAAGAAAAACAAGCGCTCATTGACCAGTTCCGAGCAAATGGTACTCAAACTTACAGCGCTACAGTCAATGTCTATGGTAACAAAGACGGTAAACCAGACTTGGACAACATCGTAGCAACTAAAAAAGTCACTATTAACATAAACGGTTTAATTTCTAAAGAAACAGTTCAAAAAGCCGTTGCAGACAACGTTAAGGACAGTATCGATGTTCCAGCAGCCTACCTAGAAAAAGCCAAGGGTGAAGGTCCATTCACAGCAGGTGTCAACCATGTGATTCCATACGAACTCTTCGCAGGTGGTGGTATGTTGACTCGTCTCTTGCTCAAGGCATCTGACAAGGCACCATGGTCAGATAACGGTGACGCTAAAAACCCAGCCCTATCTCCACTAGGTGAAAACGTGAAGACCAAAGGTCAATACTTCTATCAATTAGCCTTGGACGGAAATGTAGCTGGCAAAGAAAAACAAGCGCTCATTGACCAGTTCCGAGCAAATGGTACTCAAACTTACAGCGCTACAGTCAATGTCTATGGTAACAAAGACGGTAAACCAGATTTGGACAACATCGTAGCAACTAAAAAAGTCACTATTAACATAAACGGTTTAATTTCTAAAGAAACTGTCGAAAAAGCCGTTGCAGACAACGTTAAGGACAGTATCGATGTTCCAGCAGCCTACTTAGAAAAAGCCAAGGGTGAAGGTCCATTCACAGCAGGTGTCAACCATGTGATTCCATACGAACTCTTCGCAGGTGATGGTATGTTGACTCGTCTCTTGCTCAAGGCATCTGACAAGGCACCATGGTCAGATAACGGTGACGCTAAAAACCCAGCCCTATCTCCACTAGGTGAAAACGTGAAGACCAAAGGTCAATACTTCTATCAATTAGCCTTGGACGGAAATGTAGCTGGCAAAGAAAAACAAGCGCTCATTGACCAGTTCCGAGCAAACGGTACTCAAACTTACAGCGCTACAGTCAATGTCTATGGTAACAAAGATGGTAAACCAGACTTGGACAACATCGTAGCAACTAAAAAAGTCACTATTAAGATAAATGTTAAAGAAACATCAGACACAGCAAATGGTTCATTATCACCTTCTAACTCTGGTTCTGGCGTGACTCCGATGAATCACAATCATGCTACAGGTACTACAGATAGCATGCCTGCTGACACCATGACAAGTTCTACCAACACGATGGCAGGTGAAAACATGGCTGCTTCTGCTAACAAGATGTCTGATACGATGATGTCAGAGGATAAAGCTATGCTACCAAATACTGGTGAGACTCAAACATCAATGGCAAGTATTGGTTTCCTTGGGCTTGCGCTTGCAGGTTTACTCGGTGGTCTAGGTTTGAAAAACAAAAAAGAAGAAAACTAA
>VFDBC~~~pspA~~~61~~~pneumococcal_surface_protein_A Streptococcus_pneumoniae_TIGR4
atgaataagaaaaaaatgattttaacaagtctagccagcgtcgctatcttaggggctggttttgttacgtctcagcctacttttgtaagagcagaagaatctccacaagttgtcgaaaaatcttcattagagaagaaatatgaggaagcaaaagcaaaagctgatactgccaagaaagattacgaaacggctaaaaagaaagcagaagacgctcagaaaaagtatgaagatgatcagaagagaactgaggagaaagctcgaaaagaagcagaagcatctcaaaaattgaatgatgtggcgcttgttgttcaaaatgcatataaagagtaccgagaagttcaaaatcaacgtagtaaatataaatctgacgctgaatatcagaaaaaattaacagaggtcgactctaaaatagagaaggctaggaaagagcaacaggacttgcaaaataaatttaatgaagtaagagcagttgtagttcctgaaccaaatgcgttggctgagactaagaaaaaagcagaagaagctaaagcagaagaaaaagtagctaagagaaaatatgattatgcaactctaaaggtagcactagcgaagaaagaagtagaggctaaggaacttgaaattgaaaaacttcaatatgaaatttctactttggaacaagaagttgctactgctcaacatcaagtagataatttgaaaaaacttcttgctggtgcggatcctgatgatggcacagaagttatagaagctaaattaaaaaaaggagaagctgagctaaacgctaaacaagctgagttagcaaaaaaacaaacagaacttgaaaaacttcttgacagccttgatcctgaaggtaagactcaggatgaattagataaagaagcagaagaagctgagttggataaaaaagctgatgaacttcaaaataaagttgctgatttagaaaaagaaattagtaaccttgaaatattacttggaggggctgatcctgaagatgatactgctgctcttcaaaataaattagctgctaaaaaagctgagttagcaaaaaaacaaacagaacttgaaaaacttcttgacagccttgatcctgaaggtaagactcaggatgaattagataaagaagcagaagaagctgagttggataaaaaagctgatgaacttcaaaataaagttgctgatttagaaaaagaaattagtaaccttgaaatattacttggaggggctgattctgaagatgatactgctgctcttcaaaataaattagctactaaaaaagctgaattggaaaaaactcaaaaagaattagatgcagctcttaatgagttaggccctgatggagatgaagaagaaactccagcgccggctcctcaaccagagcaaccagctcctgcaccaaaaccagagcaaccagctccagctccaaaaccagagcaaccagctcctgcaccaaaaccagagcaaccagctccagctccaaaaccagagcaaccagctccagctccaaaaccagagcaaccagctaagccggagaaaccagctgaagagcctactcaaccagaaaaaccagccactccaaaaacaggctggaaacaagaaaacggtatgtggtatttctacaatactgatggttcaatggcaataggttggctccaaaacaacggttcatggtactacctaaacgctaacggcgctatggcaacaggttgggtgaaagatggagatacctggtactatcttgaagcatcaggtgctatgaaagcaagccaatggttcaaagtatcagataaatggtactatgtcaacagcaatggcgctatggcgacaggctggctccaatacaatggctcatggtactacctcaacgctaatggtgatatggcgacaggatggctccaatacaacggttcatggtattacctcaacgctaatggtgatatggcgacaggatgggctaaagtcaacggttcatggtactacctaaacgctaacggtgctatggctacaggttgggctaaagtcaacggttcatggtactacctaaacgctaacggttcaatggcaacaggttgggtgaaagatggagatacctggtactatcttgaagcatcaggtgctatgaaagcaagccaatggttcaaagtatcagataaatggtactatgtcaatggcttaggtgcccttgcagtcaacacaactgtagatggctataaagtcaatgccaatggtgaatgggtttaa
>VFDBC~~~zmpC~~~62~~~zinc_metalloprotease_ZmpC Streptococcus_pneumoniae_TIGR4
atgagccgaaaaagcattggtgagaaacgccatagtttctcgatgagaaagttgtcagtgggattggtatcagttactgtatctagtttctttttgatgagtcaagggattcaatcggtatcggccgataatatggaaagtccaattcattataagtatatgaccgagggtaaattgacagacgaggaaaaatccttgctggtagaggcccttccacaactggctgaagaatcagatgatacttattacttggtttatagatctcaacagtttttaccgaatacaggttttaacccaactgttggtactttcctttttactgcaggattgagcttgttagttttattggtttctaaaagggaaaatggaaagaaacgacttgttcattttctgctgttgactagcatgggagttcaattgttgccggccagtgcttttgggttgaccagccagattttatctgcctataatagtcagctttctatcggagtcggggaacatttaccagagcctctgaaaatcgaaggttatcaatatattggttatatcaaaactaagaaacaggataatacagagctttcaaggacagttgatgggaaatactctgctcaaagagatagtcaaccaaactctacaaaaacatcagatgtagttcattcagctgatttagaatggaaccaaggacaggggaaggttagtttacaaggtgaagcatcaggggatgatggactttcagaaaaatcttctatagcagcagacaatctatcttctaatgattcattcgcaagtcaagttgagcagaatccggatcacaaaggagaatctgtagttcgaccaacagtgccagaacaaggaaatcctgtgtctgctacaacggtgcagagtgcggaagaggaagtattggcgacgacaaatgatcgaccagagtataaacttccattggaaaccaaaggcacgcaagaacccggtcatgagggtgaagccgcagtccgtgaagacttaccagtctacactaagccactagaaaccaaaggtacacaaggacccggacatgaaggtgaagctgcagttcgcgaggaagaaccagcttacacagaaccgttagcaacgaaaggcacgcaagagccaggtcatgagggcaaagctacagtccgcgaagagactctagagtacacggaaccggtagcgacaaaaggcacacaagaacccgaacatgagggcgaagcggcagtagaagaagaacttccggctttagaggtcactacacgaaatagaacggaaatccagaatattccttatacaacagaagaaattcaggatccaacacttctgaaaaatcgtcgtaagattgaacgacaagggcaagcagggacacgtacaattcaatatgaagactacatcgtaaatggtaatgtcgtagaaactaaagaagtgtcacgaactgaagtagctccggtcaacgaagtcgttaaagtaggaacacttgtgaaagttaaacctacagtagaaattacaaacttaacaaaagttgagaacaaaaaatctataactgtaagttataacttaatagacactacctcagcatatgtttctgcaaaaacgcaagttttccatggagacaagctagttaaagaggtggatatagaaaatcctgccaaagagcaagtaatatcaggtttagattactacacaccgtatacagttaaaacacacctaacttataatttgggtgaaaataatgaggaaaatactgaaacatcaactcaagatttccaattagagtataagaaaatagagattaaagatattgattcagtagaattatacggtaaagaaaatgatcgttatcgtagatatttaagtctaagtgaagcgccgactgatacggctaaatactttgtaaaagtgaaatcagatcgcttcaaagaaatgtacctacctgtaaaatctattacagaaaatacggatggaacgtataaagtgacggtagccgttgatcaacttgtcgaagaaggtacagacggttacaaagatgattacacatttactgtagctaaatctaaagcagagcaaccaggagtttacacatcctttaaacagctggtaacagccatgcaaagcaatctgtctggtgtctatacattggcttcagatatgaccgcagatgaggtgagcttaggcgataagcagacaagttatctcacaggtgcatttacagggagcttgatcggttctgatggaacaaaatcgtatgccatttatgatttgaagaaaccattatttgatacattaaatggtgctacagttagagatttggatattaaaactgtttctgctgatagtaaagaaaatgtcgcagcgctggcgaaggcagcgaatagcgcgaatattaataatgttgcagtagaaggaaaaatctcaggtgcgaaatctgttgcgggattagtagcgagcgcaacaaatacagtgatagaaaacagctcgtttacagggaaacttatcgcaaatcaccaggacagtaataaaaatgatactggaggaatagtaggtaatataacaggaaatagttcgagagttaataaagttagggtagatgccttaatctctactaatgcacgcaataataaccaaacagctggagggatagtaggtagattagaaaatggtgcattgatatctaattcggttgctactggagaaatacgaaatggtcaaggatattctagagtcggaggaatagtaggatctacgtggcaaaacggtcgagtaaataatgttgtgagtaacgtagatgttggagatggttatgttatcaccggtgatcaatacgcagcagcagatgtgaaaaatgcaagtacatcagttgataatagaaaagcagacagattcgctacaaaattatcaaaagaccaaatagacgcgaaagttgctgattatggaatcacagtaactcttgatgatactgggcaagatttaaaacgtaatctaagagaagttgattatacaagactaaataaagcagaagctgaaagaaaagtagcttatagcaacatagaaaaactgatgccattctacaataaagacctagtagttcactatggtaacaaagtagcgacaacagataaactttacactacagaattgttagatgttgtgccgatgaaagatgatgaagtagtaacggatattaataataagaaaaattcaataaataaagttatgttacatttcaaagataatacagtagaatacctagatgtaacattcaaagaaaacttcataaacagtcaagtaatcgaatacaatgttacaggaaaagaatatatattcacaccagaagcatttgtttcagactatacagcgataacgaataacgtactaagcgacttgcaaaatgtaacacttaactcagaagctactaaaaaagtactaggagcagcgaatgatgcagccttagataacctatacttagatagacaatttgaagaagttaaagctaatatagcagaacacctaagaaaagtattagcgatggataaatcaatcaatactacaggagacggtgtagttgaatacgtaagtgagaaaatcaaaaataacaaagaagcatttatgctaggtcttacttatatgaaccgttggtacgatattaattatggtaaaatgaatacaaaagatttatctacgtacaagtttgactttaacggaaataatgagacttcaacgttggatactattgtcgcattaggaaatagtggactagataacctgagagcttcaaatactgtaggtttatatgcgaataaacttgcatcggtaaaaggagaagattcagtctttgacttcgtagaagcgtatagaaaactgttcttaccaaacaaaacaaataacgagtggtttaaagaaaatacaaaggcatatatagtcgaaatgaagtctgatattgcagaagtacgagaaaaacaagaatcaccaacagccgatagaaaatattcattaggagtttacgatagaatatcagcaccaagttgggggcataagagtatgttattaccactactaactttacctgaagaatctgtgtatatttcatcgaatatgtctacacttgcattcggttcgtatgaaagatatcgtgatagtgtggatggagttattctttcaggagatgctttacgaacttatgtaagaaatagagttgatatagcagcgaaaaggcatagagaccattatgatatttggtacaatcttcttgacagtgcttcaaaagaaaaacttttccgttctgtgatagtttatgatggattcaatgtaaaagatgagacaggaagaacttattgggcaaggttaacggataaaaacatcggctctattaaagaattcttcggacctgttgggaaatggtatgagtataatagtagtgcaggagcgtatgcgaatggaagtttaacgcactttgtgttagatagattattagatgcttatggaacgtcggtttatactcatgaaatggttcataattctgattctgcaatctactttgaaggaaatggtagacgtgaaggattgggagcggagttatacgcacttggtttactgcaatctgtagatagtgtaaattctcatattttagctttaaatacgttatataaagcagaaaaagatgatttgaatagattgcatacatataatccggtggaacgtttcgattcggatgaggcgcttcaaagttatatgcatggatcatatgatgtaatgtatacacttgatgcgatggaagcaaaagcgatattagctcaaaataatgatgttaagaaaaaatggtttagaaaaatagaaaattattacgttcgtgatactagacataataaagatacacatgcaggaaataaagtccgtccattaacagatgaagaagtagctaacttaacatcgttaaactcattaatcgacaacgacatcataaatagacgtagctatgatgatagtagagaatataaacgaaatggctactatactataagtatgttctctcctgtatacgcagcgctaagcaattcgaaaggtgctcctggagatattatgtttagaaaaatagcttatgaattacttgcggaaaaaggttatcacaaaggattcctaccttatgtttctaatcagtacggagcagaagcatttgccagcggaagcaaaacattctcatcatggcatggaagagatgttgctttagtgacagatgatttagtatttaagaaagtattcaatggtgagtactcatcatgggctgatttcaaaaaagcaatgtttaaacaacgtatagataaacaagataatctgaaaccaataacaattcaatacgaattaggtaatcctaatagtacaaaagaagtaactataacaacggctgcacaaatgcaacaattaattaatgaagcggctgcgaaagatattactaatatagatcgtgcaacgagtcataccccagcaagttgggtgcatttattaaaacaaaaaatctataatgcatatcttcgcactacagatgactttagaaattctatatataaataa
>VFDBC~~~hysA~~~63~~~Hyaluronate_lyase_precursor Streptococcus_pneumoniae_R6
ttgattttacaatatgtttattggagtgtatacatgcaaacaaaaacaaagaagctcattgtgagtttgtcttcacttgttttatcaggatttttattaaaccattatatgacagttggagcggaagaaacgactacgaataccattcagcaaagccagaaggaagttcagtatcagcaaagggatacaaaaaatttagttgaaaatggtgattttggtcagacggaggacggaagcagtccgtggacaggaagcaaagctcaggggtggtcagcttgggtagaccagaagaatagttctgcagatgcctcaactcgagtcattgaggctaaggatggggctatcactatctcaagccctgagaaattaagggcagcggttcaccgtatggttcctattgaagctaagaaaaagtataaactgcgtttcaagattaaaacagataataaagtcgggattgccaaagttcgtatcattgaggaaagtggtaaggacaagcgattgtggaattctgcaacgacgtcaggaacaaaggactggcagaccattgaagcagactatagcccgactttagatgttgataaaatcaagctggagttattctatgaaacaggaactgggactgtttcctttaaggatattgagctggtagaggtagcagaccagccttctgaggattctcaaacagataaacaacttgaggaaaagattgatttaccaattggaaaaaaacatgttttttctcttgcggactatacttataaggtagaaaatcctgacgttgcttcagtcaaaaatggaattttagaacctcttaaggaagggacaaccaatgtcattgtcagtaaagatggcaaggaagtgaaaaagattcctttgaagattctagcctctgttaaggatacatacacagaccgtttggatgactggaatggcatcatcgctgggaatcaatactatgattctaaaaatgaacagatggccaaattaaaccaggaattggaaggaaaggtagctgatagcctatccagtatttcaagtcaggcggaccgcatctatttgtgggaaaaattttcaaattataaaacgtctgcaaatctgactgccacttatcggaaattggaggagatggccaagcaagtgaccaatccttcttctcgttattatcaagatgaaactgtcgttcgaacagtcagggattccatggaatggatgcataaacatgtctacaatagtgaaaagagcattgttgggaactggtgggattatgaaatcggtacacctcgtgccatcaacaataccttgtctctgatgaaagaatacttctctgatgaggaaattaaaaaatatacagatgtgattgaaaaatttgtaccagatcccgaacatttccgaaagacgactgataacccattcaaggctctaggtggaaacttagttgatatgggaagggtaaaagtaatagctggtttactgcgtaaggatgatcaagaaatttcttctaccattcgctcgattgagcaagtgttcaagttggtagaccaaggtgaaggtttttatcaagatggatcctatatcgaccacaccaatgttgcctatacgggtgcttatgggaatgttttgattgatggcctgtctcaactgttgccagtcattcaaaagaccaagaatccaatcgataaagataaaatgcaaaccatgtaccactggattgataaatcgtttgctcctttgctggtgaatggagagctgatggatatgagtcgtggacgctcgatcagtcgtgcaaatagcgaggggcacgtggccgcagtagaagtactaagagggattcaccgaatagcggatatgtctgaaggagaaaccaaacaacgtttgcagagtcttgtgaagaccattgttcaatcggatagttattatgatgtctttaagaatttgaagacttataaggatatcagtttgatgcaatccttgttaagtgatgcaggagtcgcaagtgttccaagaacaagttacctatctgcctttaacaagatggataaaacagccatgtacaatgcagagaaagggtttggatttggcttgtcactcttttccagtcgtaccttgaattacgaacacatgaacaaggaaaataaacgtggttggtatacgagtgatgggatgttctatctttacaatggcgatttgagtcactatagcgatggctactggccaacagttaatccatataagatgcctggtacaacagagacggatgctaagagagcggatagcgatacaggtaaagttttaccgtctgctttcgttggaacgagcaaactagatgatgccaatgcgacagcaaccatggatttcaccaactggaatcaaacattgactgctcataagagctggtttatgctaaaggataagattgcctttttaggaagcaatatccaaaacacttcaacagatactgctgcaactacaattgaccagagaaaactggaatcaagtaatccatataaagtctatgtcaatgataaagaagcctcccttacagaacaagaaaaggattatcctgaaacccaaagtgtctttttagaatcgtccgattcgaaaaagaatattggttactttttctttaagaagagttcaatcagtatgagtaaggctttgcaaaagggagcctggaaggatatcaatgaaggacagtcagacaaggaagttgaaaatgaatttcttacgattagtcaggctcataagcaaaatggagattcttatggctatatgctcattcctaacgtggatcgtgccaccttcaatcaaatgataaaagagttagaaagtagcctcatcgaaaataacgaaacccttcagtctgtttatgatgccaaacaaggagtttggggcattgtgaaatatgatgattctgtctctactatttccaaccaattccaagttttgaaacgtggagtctatactattcgaaaagaaggggatgaatataagattgcctactataatcctgaaacccaggaatcagctccagatcaggaagtctttaaaaagctagagcaagcagctcagccacaagtacagaattcaaaagaaaaggaaaaatctgaagaggaaaagaaccattcggatcaaaagaatctccctcagacaggagaaggtcagtcaatcttggcaagtctagggttcttgctacttggggcgttttatttattccgtagaggaaagaacaactaa
