# Supplementary material for: Molecular Characterization Based on Whole-Genome Sequencing of Streptococcus pneumoniae in Children Living in Southwest China During 2017-2019
Source: Front Cell Infect Microbiol. 2021 Nov 2;11:726740. doi: 10.3389/fcimb.2021.726740 (PMC8593041; doi:10.3389/fcimb.2021.726740)
Supplement: Supplementary Table 1 — Association of β-lactams resistant, serotypes, STs and amino acid substitutions in PBPs. The sequences were aligned according to the corresponding amino acid sequences of R6. Catalytic motifs in PBP1a: Ser370-Thr371-Met372-Lys373 (STMK). Frequent substitutions in PBP1a conferring high MIC values: Glu397, Asn405, Pro432, Thr540, Asn546, Ala550, Thr574-Ser575-Gln576-Phe577 (TSQF), Leu583 and Ala585. Catalytic motifs in PBP2b: Ser386-Val387-Val388-Lys389 (SVVK). Frequent substitutions in PBP2b conferring high MIC values: Gln427, Thr446, Glu476, Thr489 and Ala619. Catalytic motifs in PBP2x: Ser370-Thr371-Met372-Lys373 (STMK). Frequent substitutions in PBP2x conferring high MIC values: Arg254, Met256, Ile371, Gly382, Arg384, Thr401, Asn444, Ser531, Leu546, Leu565 and Ser576. No amino acid substitution in SXN or KXG catalytic motifs was observed in this study. a. According to the Performance Standards for Antimicrobial Susceptibility Testing M100, 2020. The phenotype of penicillin resistance varies depending on the source of the strain. b. The concentration unit is μg/mL. c. Gaps were observed in this alignment. CSF, cerebrospinal fluid; BALP, bronchoalveolar lavage fluid; PEN, penicillin; CRO, ceftriaxone; CTX, cefotaxime; CXM, cefuroxime; FEP cefepime. [file Table_1.xlsx]

## Sheet: Sheet1
Strains	β-lactams resistant phenotype a	PEN MIC b	Strains sources	Serotypes	STs	PBP1a																		PBP2b														PBP2x
						No. (%) of altered amino acids		370	371	372	373	397	405	432	540	546	550	574	575	576	577	583	585	No. (%) of altered amino acids		386	387	388	389	427	446	476	489	615	616	617	619	No. (%) of altered amino acids		254	256	337	338	339	340	371	382	384	401
						Full length	316-695 AA	S	T	M	K	E	N	P	T	N	A	T	S	Q	F	L	A	Full length	224-678 AA	S	V	V	K	Q	T	E	T	K	T	G	A	Full length	254-715 AA	R	M	S	T	M	K	I	G	R	T
H2	Sensitive	≤0.03	blood	18C	870	3 (0.42)	3 (0.79)	-	-	-	-	-	-	-	-	-	-	-	-	-	-	-	-	1 (0.15)	0 (0.00)	-	-	-	-	-	-	-	-	-	-	-	-	1 (0.13)	1 (0.22)	-	-	-	-	-	-	-	-	-	-
H5	Sensitive	≤0.03	CSF	12F	4648	2 (0.28)	2 (0.53)	-	-	-	-	-	-	-	-	-	-	-	-	-	-	-	-	15 (2.21)	13 (2.86)	-	-	-	-	-	A	G	A	-	-	-	-	49 (6.53)	42 (9.09)	Q	V	-	-	-	-	-	T	-	S
L5	Sensitive	≤0.03	pleural fluid	3	4655	1 (0.14)	0 (0.00)	-	-	-	-	-	-	-	-	-	-	-	-	-	-	-	-	2 (0.29)	1 (0.22)	-	-	-	-	-	-	-	-	-	-	-	-	3 (0.40)	3 (0.65)	-	-	-	-	-	-	-	-	-	-
JT24	Sensitive	≤0.03	sputum	10A	9234	0 (0.00)	0 (0.00)	-	-	-	-	-	-	-	-	-	-	-	-	-	-	-	-	1 (0.15)	0 (0.00)	-	-	-	-	-	-	-	-	-	-	-	-	3 (0.40)	2 (0.43)	-	-	-	-	-	-	-	-	-	-
JT26	Sensitive	≤0.03	BALP	10B	2754	3 (0.42)	2 (0.53)	-	-	-	-	-	-	-	-	-	-	-	-	-	-	-	-	1 (0.15)	0 (0.00)	-	-	-	-	-	-	-	-	-	-	-	-	24 (3.20)	24 (5.19)	Q	V	-	-	-	-	-	-	-	-
JT36	Sensitive	≤0.03	sputum	3	180	1 (0.14)	0 (0.00)	-	-	-	-	-	-	-	-	-	-	-	-	-	-	-	-	2 (0.29)	0 (0.00)	-	-	-	-	-	-	-	-	-	-	-	-	1 (0.13)	1 (0.22)	-	-	-	-	-	-	-	-	-	-
J4	Sensitive	≤0.06	CSF	14	876	64 (9.04) c	54 (15.30) c	-	S	-	-	V	D	T	-	G	P	N	T	G	Y	M	V	20 (2.90)	15 (3.30)	-	-	-	-	L	A	G	A	-	-	-	-	92 (12.27)	68 (14.72)	Q	V	-	A	-	-	T	T	G	S
JJ08	Sensitive	≤0.06	sputum	16F	8250	4 (0.56)	4 (1.05)	-	-	-	-	-	-	-	-	-	-	-	-	-	-	-	-	3 (0.44)	1 (0.22)	-	-	-	-	-	-	-	-	-	-	-	-	3 (0.40)	3 (0.65)	-	-	-	-	-	-	-	-	-	-
JJ10	Sensitive	≤0.06	sputum	6C	2754	1 (0.14)	1 (0.26)	-	-	-	-	-	-	-	-	-	-	-	-	-	-	-	-	1 (0.15)	0 (0.00)	-	-	-	-	-	-	-	-	-	-	-	-	24 (3.20)	24 (5.19)	Q	V	-	-	-	-	-	-	-	-
JJ14	Sensitive	≤0.06	sputum	19F	271	50 (7.06) c	42 (12.07) c	-	S	-	-	V	D	T	-	G	P	N	T	G	Y	M	V	51 (7.50)	41 (9.01)	-	-	-	-	L	A	G	A	-	-	-	G	96 (12.80)	35 (7.58)	Q	V	-	A	F	-	T	T	G	S
ZY04	Sensitive	≤0.06	blood	24	2572	3 (0.42)	3 (0.79)	-	-	-	-	-	-	-	-	-	-	-	-	-	-	-	-	2 (0.29)	0 (0.00)	-	-	-	-	-	-	-	-	-	-	-	-	2 (0.27)	1 (0.22)	-	-	-	-	-	-	-	-	-	-
ZY08	Sensitive	≤0.06	blood	18B	3594	2 (0.28)	2 (0.53)	-	-	-	-	-	-	-	-	-	-	-	-	-	-	-	-	2 (0.29)	1 (0.22)	-	-	-	-	-	-	-	-	-	-	-	-	3 (0.40)	3 (0.65)	-	-	-	-	-	-	-	-	-	-
ZY34	Sensitive	≤0.06	CSF	15A	16424	0 (0.00)	0 (0.00)	-	-	-	-	-	-	-	-	-	-	-	-	-	-	-	-	3 (0.44)	1 (0.22)	-	-	-	-	-	-	-	-	-	-	-	-	4 (0.53)	4 (0.87)	-	-	-	-	-	-	-	-	-	-
Average in strains which PEN MIC below 0.06 μg/mL						10.31 (1.45)	8.69 (2.45)																	8.00 (1.17)	5.62 (1.23)													23.46 (3.13)	16.23 (3.51)
No. (%) of altered SXXK								2 (15.38)																		0 (0.00)														2 (15.38)
H8	PEN (R)	0.12	CSF	19A	320	74 (10.45) c	42 (12.07) c	-	S	-	-	V	D	T	-	G	P	N	T	G	Y	M	V	48 (7.06)	43 (9.45)	-	-	-	-	L	A	G	A	-	-	-	G	70 (9.33)	62 (13.42)	Q	V	-	A	-	-	T	T	G	S
J1	PEN (R)	0.25	CSF	23F	14095	53 (7.49) c	50 (14.29)	-	A	-	-	I	S	T	A	G	P	N	T	G	Y	M	V	27 (3.97)	21 (4.62)	-	-	-	-	L	A	G	A	-	-	-	-	61 (8.13)	56 (12.12)	Q	V	-	A	-	-	T	T	G	S
K0	PEN (R)	0.5	CSF	29	16211	54 (7.63) c	51 (14.57)	-	A	-	-	I	S	T	A	G	P	N	T	G	Y	M	V	19 (2.79)	18 (3.96)	-	-	-	-	L	A	G	A	-	-	-	-	73 (9.73)	65 (14.07)	Q	V	-	A	-	-	T	T	G	S
J5	PEN (R) + CRO (R) + CTX (R)	0.5	CSF	19A	320	74 (10.45) c	42 (12.07) c	-	S	-	-	V	D	T	-	G	P	N	T	G	Y	M	V	48 (7.06)	43 (9.45)	-	-	-	-	L	A	G	A	-	-	-	G	70 (9.33)	62 (13.42)	Q	V	-	A	-	-	T	T	G	S
K4	PEN (R) + CRO (R) + CTX (R) + CXM (R) +FEP (R)	1	CSF	19F	16327	74 (10.45) c	42 (12.07) c	-	S	-	-	V	D	T	-	G	P	N	T	G	Y	M	V	17 (2.50)	14 (3.08)	-	-	-	-	L	A	G	A	-	-	-	-	91 (12.1)	69 (14.94)	Q	V	-	A	F	-	T	T	G	S
K2	PEN (R) + CRO (I) + CTX (I)	2	CSF	6B	90	53 (7.49) c	50 (14.29)	-	A	-	-	I	S	T	A	G	P	N	T	G	Y	M	V	19 (2.79)	18 (3.96)	-	-	-	-	L	A	G	A	-	-	-	-	73 (9.73)	65 (14.07)	Q	V	-	A	-	-	T	T	G	S
JT04	PEN (I) + CRO (R) + CTX (R) + CXM (I)	4	sputum	6A	11968	45 (6.36) c	45 (12.93) c	-	A	-	-	I	S	T	A	G	P	N	T	G	Y	M	V	14 (2.06)	13 (2.86)	-	-	-	-	L	A	G	A	-	-	-	-	75 (10.0)	67 (14.50)	Q	V	-	A	-	-	T	T	G	S
JT05	PEN (I) + CTX (I)	4	sputum	19F	271	74 (10.45) c	42 (12.07) c	-	S	-	-	V	D	T	-	G	P	N	T	G	Y	M	V	51 (7.50)	41 (9.01)	-	-	-	-	L	A	G	A	-	-	-	G	91 (12.1)	69 (14.94)	Q	V	-	A	F	-	T	T	G	S
JT06	PEN (I) + CRO (I) + CTX (R) + CXM (I)	4	sputum	19F	271	74 (10.45) c	42 (12.07) c	-	S	-	-	V	D	T	-	G	P	N	T	G	Y	M	V	51 (7.50)	41 (9.01)	-	-	-	-	L	A	G	A	-	-	-	G	91 (12.1)	69 (14.94)	Q	V	-	A	F	-	T	T	G	S
JT02	PEN (R) + CRO (I) + CTX (R) + CXM (I)	8	sputum	19F	271	74 (10.45) c	42 (12.07) c	-	S	-	-	V	D	T	-	G	P	N	T	G	Y	M	V	51 (7.50)	41 (9.01)	-	-	-	-	L	A	G	A	-	-	-	G	91 (12.1)	69 (14.94)	Q	V	-	A	F	-	T	T	G	S
JJ18	CRO (R)	2	sputum	6B	90	53 (7.49) c	50 (14.29)	-	A	-	-	I	S	T	A	G	P	N	T	G	Y	M	V	19 (2.79)	18 (3.96)	-	-	-	-	L	A	G	A	-	-	-	-	73 (9.73)	65 (14.07)	Q	V	-	A	-	-	T	T	G	S
JJ20	CRO (I)	2	sputum	19A	320	74 (10.45) c	42 (12.07) c	-	S	-	-	V	D	T	-	G	P	N	T	G	Y	M	V	48 (7.06)	43 (9.45)	-	-	-	-	L	A	G	A	-	-	-	G	70 (9.33)	62 (13.42)	Q	V	-	A	-	-	T	T	G	S
JT01	CRO (R) + CTX (R) + CXM (I)	2	sputum	19F	271	74 (10.45) c	42 (12.07) c	-	S	-	-	V	D	T	-	G	P	N	T	G	Y	M	V	51 (7.50)	41 (9.01)	-	-	-	-	L	A	G	A	-	-	-	G	91 (12.1)	69 (14.94)	Q	V	-	A	F	-	T	T	G	S
JT07	CXM (R) + FEP (I)	1	sputum	19A	320	74 (10.45) c	42 (12.07) c	-	S	-	-	V	D	T	-	G	P	N	T	G	Y	M	V	48 (7.06)	43 (9.45)	-	-	-	-	L	A	G	A	-	-	-	G	70 (9.33)	62 (13.42)	Q	V	-	A	-	-	T	T	G	S
JT08	CXM (R) + CRO (I)	1	sputum	6B	902	73 (10.31) c	41 (11.78) c	-	S	-	-	V	D	T	-	G	P	N	T	G	Y	M	V	12 (1.76) c	11 (2.40) c	-	-	-	-	-	S	G	S	-	-	-	-	68 (9.07)	64 (13.85)	-	-	-	A	-	-	T	T	G	S
JT09	CRO (R) + CTX (I) + CXM (R) + FEP (I)	2	sputum	19F	271	74 (10.45) c	42 (12.07) c	-	S	-	-	V	D	T	-	G	P	N	T	G	Y	M	V	51 (7.50)	41 (9.01)	-	-	-	-	L	A	G	A	-	-	-	G	91 (12.1)	69 (14.94)	Q	V	-	A	F	-	T	T	G	S
JT11	CXM (R)	2	sputum	19A	320	74 (10.45) c	42 (12.07) c	-	S	-	-	V	D	T	-	G	P	N	T	G	Y	M	V	48 (7.06)	43 (9.45)	-	-	-	-	L	A	G	A	-	-	-	G	70 (9.33)	62 (13.42)	Q	V	-	A	-	-	T	T	G	S
JT12	CXM (I)	1	sputum	19A	320	74 (10.45) c	42 (12.07) c	-	S	-	-	V	D	T	-	G	P	N	T	G	Y	M	V	48 (7.06)	43 (9.45)	-	-	-	-	L	A	G	A	-	-	-	G	75 (10.0)	65 (14.07)	Q	V	-	A	-	-	T	T	G	S
JT15	CXM (R) + CTX (I)	2	sputum	19F	271	74 (10.45) c	42 (12.07) c	-	S	-	-	V	D	T	-	G	P	N	T	G	Y	M	V	51 (7.50)	41 (9.01)	-	-	-	-	L	A	G	A	-	-	-	G	91 (12.1)	69 (14.94)	Q	V	-	A	F	-	T	T	G	S
JT16	CXM (R)	2	sputum	19A	320	74 (10.45) c	42 (12.07) c	-	S	-	-	V	D	T	-	G	P	N	T	G	Y	M	V	48 (7.06)	43 (9.45)	-	-	-	-	L	A	G	A	-	-	-	G	70 (9.33)	62 (13.42)	Q	V	-	A	-	-	T	T	G	S
JT18	CXM (I)	1	sputum	6B	90	53 (7.49) c	50 (14.29)	-	A	-	-	I	S	T	A	G	P	N	T	G	Y	M	V	19 (2.79)	18 (3.96)	-	-	-	-	L	A	G	A	-	-	-	-	73 (9.73)	65 (14.07)	Q	V	-	A	-	-	T	T	G	S
JT20	CXM (R)	1	sputum	6B	90	53 (7.49) c	50 (14.29)	-	A	-	-	I	S	T	A	G	P	N	T	G	Y	M	V	19 (2.79)	18 (3.96)	-	-	-	-	L	A	G	A	-	-	-	-	73 (9.73)	65 (14.07)	Q	V	-	A	-	-	T	T	G	S
JT21	CXM (R)	2	sputum	6B	902	73 (10.31) c	41 (11.78) c	-	S	-	-	V	D	T	-	G	P	N	T	G	Y	M	V	12 (1.76) c	11 (2.40) c	-	-	-	-	-	S	G	S	-	-	-	-	68 (9.07)	64 (13.85)	-	-	-	A	-	-	T	T	G	S
JT23	CXM (R)	2	sputum	6C	13025	74 (10.45) c	42 (12.07) c	-	S	-	-	V	D	T	-	G	P	N	T	G	Y	M	V	24 (3.53)	19 (4.18)	-	-	-	-	L	A	G	A	-	-	-	-	73 (9.73)	62 (13.42)	Q	V	-	A	-	-	T	T	G	S
JT25	CXM (R)	2	sputum	19A	320	74 (10.45) c	42 (12.07) c	-	S	-	-	V	D	T	-	G	P	N	T	G	Y	M	V	48 (7.06)	43 (9.45)	-	-	-	-	L	A	G	A	-	-	-	G	70 (9.33)	62 (13.42)	Q	V	-	A	-	-	T	T	G	S
JT27	CRO (R) + CTX (R) + CXM (R) +FEP (I)	2	sputum	19F	271	74 (10.45) c	42 (12.07) c	-	S	-	-	V	D	T	-	G	P	N	T	G	Y	M	V	51 (7.50)	41 (9.01)	-	-	-	-	L	A	G	A	-	-	-	G	91 (12.1)	69 (14.94)	Q	V	-	A	F	-	T	T	G	S
JT31	CXM (R)	2	sputum	3	16330	52 (7.34) c	50 (14.37) c	-	A	-	-	I	S	T	A	G	P	N	T	G	Y	M	V	19 (2.79)	18 (3.96)	-	-	-	-	L	A	G	A	-	-	-	-	73 (9.73)	65 (14.07)	Q	V	-	A	-	-	T	T	G	S
JT37	CXM (R) +FEP (I)	2	sputum	19A	320	74 (10.45) c	42 (12.07) c	-	S	-	-	V	D	T	-	G	P	N	T	G	Y	M	V	48 (7.06)	43 (9.45)	-	-	-	-	L	A	G	A	-	-	-	G	70 (9.33)	62 (13.42)	Q	V	-	A	-	-	T	T	G	S
JT39	CXM (R)	2	sputum	19A	320	74 (10.45) c	42 (12.07) c	-	S	-	-	V	D	T	-	G	P	N	T	G	Y	M	V	48 (7.06)	43 (9.45)	-	-	-	-	L	A	G	A	-	-	-	G	70 (9.33)	62 (13.42)	Q	V	-	A	-	-	T	T	G	S
JT40	CXM (R) +FEP (I)	2	sputum	34	320	74 (10.45) c	42 (12.07) c	-	S	-	-	V	D	T	-	G	P	N	T	G	Y	M	V	48 (7.06)	43 (9.45)	-	-	-	-	L	A	G	A	-	-	-	G	70 (9.33)	62 (13.42)	Q	V	-	A	-	-	T	T	G	S
K8	CRO (R) + CTX (R) + CXM (R) +FEP (R)	1	blood	19F	271	74 (10.45) c	42 (12.07) c	-	S	-	-	V	D	T	-	G	P	N	T	G	Y	M	V	51 (7.50)	41 (9.01)	-	-	-	-	L	A	G	A	-	-	-	G	91 (12.1)	69 (14.94)	Q	V	-	A	F	-	T	T	G	S
L6	CXM (R)	2	pleural fluid	19A	320	74 (10.45) c	42 (12.07) c	-	S	-	-	V	D	T	-	G	P	N	T	G	Y	M	V	48 (7.06)	43 (9.45)	-	-	-	-	L	A	G	A	-	-	-	G	70 (9.33)	62 (13.42)	Q	V	-	A	-	-	T	T	G	S
ZY05	CRO (R)	0.75	blood	14	876	63 (8.90) c	53 (15.01) c	-	S	-	-	V	D	T	-	G	P	N	T	G	Y	M	V	20 (2.94)	15 (3.30)	-	-	-	-	L	A	G	A	-	-	-	-	91 (12.1)	67 (14.50)	Q	V	-	A	-	-	T	T	G	S
ZY09	CTX (I)	0.5	blood	19A	320	74 (10.45) c	42 (12.07) c	-	S	-	-	V	D	T	-	G	P	N	T	G	Y	M	V	48 (7.06)	43 (9.45)	-	-	-	-	L	A	G	A	-	-	-	G	70 (9.33)	62 (13.42)	Q	V	-	A	-	-	T	T	G	S
ZY22	CTX (I)	0.5	blood	14	876	63 (8.90) c	53 (15.01) c	-	S	-	-	V	D	T	-	G	P	N	T	G	Y	M	V	20 (2.94)	15 (3.30)	-	-	-	-	L	A	G	A	-	-	-	-	91 (12.1)	67 (14.50)	Q	V	-	A	-	-	T	T	G	S
ZY27	CRO (R) + CTX (R)	1.5	blood	19F	271	74 (10.45) c	42 (12.07) c	-	S	-	-	V	D	T	-	G	P	N	T	G	Y	M	V	51 (7.50)	41 (9.01)	-	-	-	-	L	A	G	A	-	-	-	G	91 (12.1)	69 (14.94)	Q	V	-	A	F	-	T	T	G	S
ZY28	CRO (R) + CTX (R)	1	blood	19F	271	74 (10.45) c	42 (12.07) c	-	S	-	-	V	D	T	-	G	P	N	T	G	Y	M	V	51 (7.50)	41 (9.01)	-	-	-	-	L	A	G	A	-	-	-	G	91 (12.1)	69 (14.94)	Q	V	-	A	F	-	T	T	G	S
ZY31	CRO (R) + CTX (R)	0.5	ascites	19F	271	74 (10.45) c	42 (12.07) c	-	S	-	-	V	D	T	-	G	P	N	T	G	Y	M	V	51 (7.50)	41 (9.01)	-	-	-	-	L	A	G	A	-	-	-	G	91 (12.1)	69 (14.94)	Q	V	-	A	F	-	T	T	G	S
ZY32	CRO (R) + CTX (R)	1	secretions	19F	271	74 (10.45) c	42 (12.07) c	-	S	-	-	V	D	T	-	G	P	N	T	G	Y	M	V	51 (7.50)	41 (9.01)	-	-	-	-	L	A	G	A	-	-	-	G	91 (12.1)	69 (14.94)	Q	V	-	A	F	-	T	T	G	S
ZY33	CRO (R) + CTX (R)	0.5	secretions	19F	271	74 (10.45) c	42 (12.07) c	-	S	-	-	V	D	T	-	G	P	N	T	G	Y	M	V	51 (7.50)	41 (9.01)	-	-	-	-	L	A	G	A	-	-	-	G	91 (12.1)	69 (14.94)	Q	V	-	A	F	-	T	T	G	S
ZY35	CRO (R) + CTX (R)	0.5	secretions	19F	271	74 (10.45) c	42 (12.07) c	-	S	-	-	V	D	T	-	G	P	N	T	G	Y	M	V	51 (7.50)	41 (9.01)	-	-	-	-	L	A	G	A	-	-	-	G	91 (12.1)	69 (14.94)	Q	V	-	A	F	-	T	T	G	S
Average in strains which resistant to β-lactams						69.12 (9.76)	43.95 (12.61)																	38.98 (5.73)	33.17 (7.29)													79.15 (10.54)	65.39 (14.16)
No. (%) of altered SXXK								41 (100.00)																		0 (0.00)														41 (100.00)
P value						0.008	0.141	0.000																0.001	0.001	-												0.018	0.003	0.000
Note: The sequences were aligned according to the corresponding amino acid sequences of R6. Catalytic motifs in PBP1a: Ser370-Thr371-Met372-Lys373 (STMK). Frequent substitutions in PBP1a conferring high MIC values: Glu397, Asn405, Pro432, Thr540, Asn546, Ala550, Thr574-Ser575-Gln576-Phe577 (TSQF), Leu583 and Ala585. Catalytic motifs in PBP2b: Ser386-Val387-Val388-Lys389 (SVVK). Frequent substitut…
[truncated: 5 more columns]
